# Supplementary material
Source: publisher figshare collection journal article supplement (https://frontiersin.figshare.com/ndownloader/files/13292702)
Supplement: Supplementary file 1 [file 13292702]

## Sheet: MetaData
Supplementary data for the article:
Replacing imports of crop based commodities by domestic production in Finland: potential to reduce virtual water imports
Vilma Sandström, Elina Lehikoinen and Pirjo Peltonen-Sainio
This file shows the data for crop imports in Finland (t) and the respective green and blue virtual water imports (m3) together with the average green-blue water scarcity in the production country.
The units for the green-blue water scarcity are:
< 0.5 critical GBW scarcity
> 0.5-1 high scarcity
> 1-1.5 moderate
> 1.5-2 approaching
>>2 no scarcity
It should be noted that the green blue water scarcity has been calculated only for the year 2000 and therefore the temporal dynamics of water scarcity are not accounted here.
Food trade analysis: updated data from Kastner, Thomas, Karl-Heinz Erb, and Helmut Haberl. (2014) Rapid growth in agricultural trade: effects on global area efficiency and the role of management. Environmental Research Letters 9.3 : 034015.
Virtual water imports have been calculated using the water use coefficients from Mekonnen, M.M. and Hoekstra, A.Y. (2011) The green, blue and grey water footprint of crops and derived crop products, Hydrology and Earth System Sciences, 15(5): 1577-1600.
Available on http://waterfootprint.org
Green-Blue water scarcity data is aggregated from FPU to country level using weighted averages by food production.
The original green-blue water scarcity data retrieved from Kummu, M., Gerten, D., Heinke, J., Konzmann, M., & Varis, O. (2014). Climate-driven interannual variability of water scarcity in food production potential: a global analysis. Hydrology and Earth System Sciences, 18(2), 447-461.

## Sheet: 2011
Year	CountryCode	CountryName	ProductCode	ProductName	Imports	BlueWaterImports	GreenWaterImports	GBScarcity
2011	256	Luxembourg	103	Grain, mixed	0.0289755	0	16.6609	1.954
2011	54	Denmark	103	Grain, mixed	0.0109	0	0	7.856
2011	68	France	103	Grain, mixed	48.6323	5398.19	46443.9	5.064
2011	126	Lithuania	103	Grain, mixed	0.608172	6.08172	1366.56	8.15
2011	255	Belgium	103	Grain, mixed	0.427448	10.6862	359.056	2.037
2011	79	Germany	103	Grain, mixed	17.2321	86.1607	15836.3	3.061
2011	210	Sweden	103	Grain, mixed	0.353627	3.18264	381.563	20.223
2011	229	United Kingdom	103	Grain, mixed	251.41	5782.43	205151	5.868
2011	167	Czech Republic	103	Grain, mixed	0.658589	23.0506	1519.37	3.932
2011	33	Canada	103	Grain, mixed	0.0476687	1.09638	63.733	110.909
2011	203	Spain	103	Grain, mixed	1.00264	2075.47	1868.93	2.701
2011	173	Poland	103	Grain, mixed	2.14151	2.14151	3674.83	3.103
2011	11	Austria	103	Grain, mixed	0.0221826	0.798574	24.8667	2.873
2011	223	Turkey	103	Grain, mixed	4.912	5024.98	10835.9	1.801
2011	119	Latvia	103	Grain, mixed	20.2523	20.2523	36089.5	8.345
2011	63	Estonia	103	Grain, mixed	5.23608	10.4722	11262.8	8.345
2011	216	Thailand	108	Cereals, nes	37.5443	1914.76	81358.5	3.613
2011	126	Lithuania	108	Cereals, nes	96.5836	386.334	184378	8.15
2011	183	Romania	108	Cereals, nes	5.50004	187.002	7304.06	4.002
2011	185	Russia	108	Cereals, nes	0.334912	36.8404	1640.07	12.681
2011	202	South Africa	108	Cereals, nes	0.0101444	13.0559	15.2572	2.449
2011	198	Slovenia	108	Cereals, nes	5.03094	25.1547	4583.19	4.224
2011	167	Czech Republic	108	Cereals, nes	88.1215	704.972	79133.1	3.932
2011	11	Austria	108	Cereals, nes	5799.52	5799.52	1.1657e+06	2.873
2011	173	Poland	108	Cereals, nes	5040.74	0	6.21019e+06	3.103
2011	222	Tunisia	108	Cereals, nes	0.336881	901.494	642.433	0.869
2011	256	Luxembourg	108	Cereals, nes	15.4876	0	6257.01	1.954
2011	27	Bulgaria	108	Cereals, nes	0.373076	34.696	742.421	4.006
2011	138	Mexico	108	Cereals, nes	0.0826136	0	0	4.236
2011	230	Ukraine	108	Cereals, nes	0.205901	7.41244	398.831	4.3
2011	9	Argentina	108	Cereals, nes	6.29019	1000.14	11196.5	13.678
2011	199	Slovak Republic	108	Cereals, nes	11.1052	888.418	17912.7	3.987
2011	106	Italy	108	Cereals, nes	41.7144	3837.73	26280.1	2.273
2011	108	Kazakhstan	108	Cereals, nes	1.31182	3673.09	2172.37	11.614
2011	57	Belarus	108	Cereals, nes	11.1539	11.1539	24047.8	5.092
2011	84	Greece	108	Cereals, nes	1.74208	0	0	4.259
2011	41	China	108	Cereals, nes	0.71143	12.8057	882.884	1.508
2011	104	Ireland	108	Cereals, nes	9.33438	0	0	19.74
2011	156	New Zealand	108	Cereals, nes	0.187898	0	66.7038	58.852
2011	170	Peru	108	Cereals, nes	0.023513	27.6748	45.0039	7.61
2011	97	Hungary	108	Cereals, nes	34.3291	2094.07	72125.4	4.007
2011	272	Serbia	108	Cereals, nes	1.71174	NA	NA	4.37
2011	68	France	108	Cereals, nes	3483.55	0	0	5.064
2011	211	Switzerland	108	Cereals, nes	4.71837	0	0	1.642
2011	234	Uruguay	116	Potatoes	2.06974	82.7896	480.18	14.962
2011	79	Germany	116	Potatoes	8154	65232	684936	3.061
2011	105	Israel	116	Potatoes	212.012	21837.3	9328.54	0.486
2011	165	Pakistan	116	Potatoes	0.0987227	12.8339	5.2323	0.594
2011	40	Chile	116	Potatoes	2.70066	283.569	240.359	21.914
2011	33	Canada	116	Potatoes	7.63977	0	1046.65	110.909
2011	41	China	116	Potatoes	9.41405	65.8983	2024.02	1.508
2011	50	Cyprus	116	Potatoes	77.786	4433.8	5211.66	NA
2011	143	Morocco	116	Potatoes	23.88	764.159	3199.92	0.939
2011	112	Jordan	116	Potatoes	0.0628258	8.92126	1.63347	0.108
2011	59	Egypt	116	Potatoes	80.2827	23201.7	1685.94	1.681
2011	63	Estonia	116	Potatoes	604.16	0	119624	8.345
2011	80	Bosnia and Herzegovina	116	Potatoes	0.354579	2.83663	165.588	4.4
2011	162	Norway	116	Potatoes	0.565407	8.4811	71.8066	55.393
2011	194	Saudi Arabia	116	Potatoes	0.305362	80.921	4.27507	0.479
2011	3	Albania	116	Potatoes	0.018448	1.14377	2.69341	4.4
2011	21	Brazil	116	Potatoes	0.0636852	1.46476	13.8197	16.749
2011	84	Greece	116	Potatoes	21.0189	2017.82	1807.63	4.259
2011	170	Peru	116	Potatoes	0.355634	59.0353	35.5634	7.61
2011	216	Thailand	116	Potatoes	0.03529	0	13.4455	3.613
2011	57	Belarus	116	Potatoes	1.18	1.18	259.6	5.092
2011	183	Romania	116	Potatoes	30.7548	184.529	8180.77	4.002
2011	230	Ukraine	116	Potatoes	3.22115	12.8846	1075.86	4.3
2011	272	Serbia	116	Potatoes	0.432552	NA	NA	4.37
2011	27	Bulgaria	116	Potatoes	0.722241	10.1114	211.616	4.006
2011	154	NA	116	Potatoes	0.255847	NA	NA	NA
2011	124	Libya	116	Potatoes	0.39609	52.2838	24.5576	1.143
2011	68	France	116	Potatoes	3055.04	48880.6	241348	5.064
2011	134	Malta	116	Potatoes	8.14851	977.822	537.802	NA
2011	54	Denmark	116	Potatoes	11078.7	177259	841978	7.856
2011	198	Slovenia	116	Potatoes	6.9601	13.9202	1426.82	4.224
2011	237	Vietnam	116	Potatoes	0.596531	0	287.528	3.809
2011	113	Kyrgyz Republic	116	Potatoes	0.0164646	0.296363	1.39949	1.352
2011	110	Japan	116	Potatoes	0.26188	0.523761	28.545	3.555
2011	4	Algeria	116	Potatoes	0.194394	39.6564	12.0524	0.85
2011	174	Portugal	116	Potatoes	23.7392	4629.14	4890.28	2.74
2011	167	Czech Republic	116	Potatoes	46.6631	93.3263	6812.82	3.932
2011	44	Colombia	116	Potatoes	0.0280998	0	6.85636	9.648
2011	9	Argentina	116	Potatoes	0.338293	17.2529	49.0524	13.678
2011	121	Lebanon	116	Potatoes	0.172267	51.6801	4.1344	0.544
2011	102	Iran	116	Potatoes	0.156106	NA	NA	0.976
2011	225	United Arab Emirates	116	Potatoes	0.0156937	1.17703	2.88765	0.37
2011	256	Luxembourg	116	Potatoes	4.89908	0	578.092	1.954
2011	119	Latvia	116	Potatoes	211.022	0	46424.9	8.345
2011	185	Russia	116	Potatoes	3.71098	7.42196	1105.87	12.681
2011	173	Poland	116	Potatoes	3248.1	3248.1	623636	3.103
2011	98	Croatia	116	Potatoes	0.0864033	0.345613	37.1534	4.398
2011	211	Switzerland	116	Potatoes	35.3208	0	3461.44	1.642
2011	100	India	116	Potatoes	0.959243	34.5328	211.993	0.881
2011	106	Italy	116	Potatoes	378.976	17432.9	48887.9	2.273
2011	229	United Kingdom	116	Potatoes	678.75	8823.75	44797.5	5.868
2011	202	South Africa	116	Potatoes	1.50612	102.416	135.551	2.449
2011	97	Hungary	116	Potatoes	4.24059	33.9247	682.735	4.007
2011	126	Lithuania	116	Potatoes	271.084	0	57198.7	8.15
2011	99	Iceland	116	Potatoes	0.0512728	0	8.71638	NA
2011	138	Mexico	116	Potatoes	0.0949985	10.6398	13.1098	4.236
2011	255	Belgium	116	Potatoes	10087.8	0	807023	2.037
2011	11	Austria	116	Potatoes	61.188	917.82	6975.43	2.873
2011	199	Slovak Republic	116	Potatoes	1.18511	14.2213	287.981	3.987
2011	231	United States	116	Potatoes	18.845	1677.2	923.405	22
2011	150	Netherlands	116	Potatoes	23206.5	69619.6	1.7637e+06	3.277
2011	203	Spain	116	Potatoes	680.03	52362.3	61202.7	2.701
2011	222	Tunisia	116	Potatoes	4.49837	548.801	512.814	0.869
2011	210	Sweden	116	Potatoes	5662.68	50964.1	554943	20.223
2011	16	Bangladesh	116	Potatoes	1.7579	137.116	318.18	2.294
2011	223	Turkey	116	Potatoes	0.199311	15.1476	11.3607	1.801
2011	10	Australia	116	Potatoes	1.06459	105.394	54.294	53.268
2011	156	New Zealand	116	Potatoes	4.731	0	378.48	58.852
2011	104	Ireland	116	Potatoes	31.9073	31.9073	3126.92	19.74
2011	41	China	122	Sweet potatoes	262.144	1048.57	63438.8	1.508
2011	106	Italy	122	Sweet potatoes	2.51699	100.68	714.826	2.273
2011	29	Burundi	122	Sweet potatoes	0.0388177	0	25.2315	0.42
2011	107	Cote d'Ivoire	122	Sweet potatoes	0.0455694	NA	NA	2.937
2011	21	Brazil	122	Sweet potatoes	93.2155	652.508	39803	16.749
2011	10	Australia	122	Sweet potatoes	0.197444	6.12075	47.9788	53.268
2011	131	Malaysia	122	Sweet potatoes	0.064103	0.128206	29.231	25.815
2011	117	South Korea	122	Sweet potatoes	0.0739613	NA	NA	1.14
2011	138	Mexico	122	Sweet potatoes	1.21664	55.9655	282.261	4.236
2011	170	Peru	122	Sweet potatoes	4.1827	196.587	895.098	7.61
2011	169	Paraguay	122	Sweet potatoes	0.408836	0	387.168	15.566
2011	195	Senegal	122	Sweet potatoes	0.351508	3.86659	142.009	1.544
2011	81	Ghana	122	Sweet potatoes	5.63729	5.63729	14206	2.981
2011	105	Israel	122	Sweet potatoes	127.501	23970.2	6757.56	0.486
2011	251	Zambia	122	Sweet potatoes	0.119805	0.23961	39.0565	5.161
2011	84	Greece	122	Sweet potatoes	0.190266	22.2612	23.4028	4.259
2011	202	South Africa	122	Sweet potatoes	113.28	79069.3	135030	2.449
2011	95	Honduras	122	Sweet potatoes	115.639	462.555	83491.1	4.51
2011	143	Morocco	122	Sweet potatoes	0.0135348	0.866225	3.39723	0.939
2011	32	Cameroon	122	Sweet potatoes	0.87625	1.7525	773.729	4.848
2011	56	Dominican Republic	122	Sweet potatoes	5.5105	71.6365	4871.28	1.03
2011	214	Taiwan	122	Sweet potatoes	0.104903	NA	NA	2
2011	237	Vietnam	122	Sweet potatoes	7.4139	7.4139	5085.94	3.809
2011	48	Costa Rica	122	Sweet potatoes	3.491	0	0	4.51
2011	89	Guatemala	122	Sweet potatoes	0.0312504	0	0	4.459
2011	109	Jamaica	122	Sweet potatoes	1.76734	5.30203	512.53	1.94
2011	234	Uruguay	122	Sweet potatoes	10.8241	184.009	6093.95	14.962
2011	38	Sri Lanka	122	Sweet potatoes	0.03468	8.18447	22.0911	2.1
2011	226	Uganda	122	Sweet potatoes	1.57314	0	1249.07	1.578
2011	101	Indonesia	122	Sweet potatoes	0.0357597	0.607915	20.1685	16.287
2011	203	Spain	122	Sweet potatoes	25.8108	4078.11	4852.44	2.701
2011	174	Portugal	122	Sweet potatoes	16.882	3140.05	7225.49	2.74
2011	129	Madagascar	122	Sweet potatoes	0.0757897	0.0757897	87.3855	5.758
2011	207	Suriname	122	Sweet potatoes	2.37577	0	743.616	121.744
2011	100	India	122	Sweet potatoes	0.0504962	0.605954	29.6413	0.881
2011	9	Argentina	122	Sweet potatoes	0.103666	4.14663	40.8443	13.678
2011	59	Egypt	122	Sweet potatoes	96.708	11798.4	5995.9	1.681
2011	19	Bolivia	122	Sweet potatoes	0.0322595	1.74201	37.7436	11.75
2011	58	Ecuador	122	Sweet potatoes	0.0922852	25.3784	141.935	2.575
2011	159	Nigeria	122	Sweet potatoes	0.0223251	0.0223251	28.7324	2.328
2011	231	United States	122	Sweet potatoes	944.566	53840.2	198359	22
2011	115	Cambodia	125	Cassava	41.8758	0	26549.2	9.505
2011	197	Sierra Leone	125	Cassava	0.0149774	0	24.6977	2.658
2011	129	Madagascar	125	Cassava	0.0264482	0	29.4103	5.758
2011	81	Ghana	125	Cassava	14.4077	0	7780.15	2.981
2011	38	Sri Lanka	125	Cassava	2.2123	0	1747.72	2.1
2011	233	Burkina Faso	125	Cassava	0.080791	0	215.389	0.973
2011	95	Honduras	125	Cassava	0.0730731	0	114.067	4.51
2011	120	Lao	125	Cassava	1.17916	NA	NA	8.865
2011	226	Uganda	125	Cassava	0.0771407	0	35.4847	1.578
2011	159	Nigeria	125	Cassava	0.169587	0	88.0155	2.328
2011	166	Panama	125	Cassava	0.0256057	0	15.3634	4.505
2011	58	Ecuador	125	Cassava	2.3682	0	1783.26	2.575
2011	101	Indonesia	125	Cassava	2.70184	0	1134.77	16.287
2011	9	Argentina	125	Cassava	5.10969	0	12467.6	13.678
2011	237	Vietnam	125	Cassava	151.712	0	85565.5	3.809
2011	90	Guinea	125	Cassava	0.0931911	0	86.5746	2.492
2011	21	Brazil	125	Cassava	998.084	998.084	432170	16.749
2011	44	Colombia	125	Cassava	0.456453	0	273.415	9.648
2011	216	Thailand	125	Cassava	997.477	0	433903	3.613
2011	100	India	125	Cassava	3.93386	0	1014.94	0.881
2011	171	Philippines	125	Cassava	0.535756	0	476.823	3.939
2011	28	Myanmar	125	Cassava	0.0517819	0	37.5936	9.429
2011	41	China	125	Cassava	3.32746	0	1101.39	1.508
2011	107	Cote d'Ivoire	125	Cassava	2.50019	NA	NA	2.937
2011	32	Cameroon	125	Cassava	1.96726	0	1247.24	4.848
2011	157	Nicaragua	125	Cassava	0.278796	0	198.782	4.51
2011	89	Guatemala	125	Cassava	0.0271458	0	76.8497	4.459
2011	48	Costa Rica	125	Cassava	100.146	0	52276	4.51
2011	169	Paraguay	125	Cassava	30.5052	0	16289.8	15.566
2011	66	Fiji	125	Cassava	0.16594	NA	NA	NA
2011	170	Peru	125	Cassava	0.195179	0	113.789	7.61
2011	217	Togo	125	Cassava	0.250599	0	186.446	1.598
2011	207	Suriname	125	Cassava	0.506144	0	161.966	121.744
2011	21	Brazil	137	Yams	4.12736	28.8915	1877.95	16.749
2011	171	Philippines	149	Roots and tubers, nes	0.11447	0.22894	67.9952	3.939
2011	44	Colombia	149	Roots and tubers, nes	1.07375	9.66376	266.29	9.648
2011	66	Fiji	149	Roots and tubers, nes	9.5629	NA	NA	NA
2011	216	Thailand	149	Roots and tubers, nes	8.578	85.78	2221.7	3.613
2011	91	Guyana	149	Roots and tubers, nes	0.0264639	0	8.4949	127.073
2011	217	Togo	149	Roots and tubers, nes	2.63202	0	1129.14	1.598
2011	107	Cote d'Ivoire	149	Roots and tubers, nes	4.87495	NA	NA	2.937
2011	207	Suriname	149	Roots and tubers, nes	0.560077	0	222.35	121.744
2011	101	Indonesia	149	Roots and tubers, nes	1.69161	60.8981	879.639	16.287
2011	114	Kenya	149	Roots and tubers, nes	0.102774	0.616642	29.9071	1.018
2011	63	Estonia	149	Roots and tubers, nes	9.88126	0	790.501	8.345
2011	203	Spain	149	Roots and tubers, nes	3.01187	240.95	243.961	2.701
2011	165	Pakistan	149	Roots and tubers, nes	0.398198	25.4847	11.5478	0.594
2011	47	Cook Is	149	Roots and tubers, nes	0.0105998	NA	NA	NA
2011	110	Japan	149	Roots and tubers, nes	3.91124	3.91124	637.532	3.555
2011	244	Samoa	149	Roots and tubers, nes	0.025691	0	9.58273	NA
2011	59	Egypt	149	Roots and tubers, nes	0.297373	188.535	31.5216	1.681
2011	198	Slovenia	149	Roots and tubers, nes	14.1663	0	0	4.224
2011	250	Congo, Dem. Rep.	149	Roots and tubers, nes	0.0262077	NA	NA	7.345
2011	41	China	149	Roots and tubers, nes	34.1924	205.155	6086.26	1.508
2011	138	Mexico	149	Roots and tubers, nes	0.360068	9.36177	32.7662	4.236
2011	95	Honduras	149	Roots and tubers, nes	0.03318	0.3318	13.4047	4.51
2011	81	Ghana	149	Roots and tubers, nes	26.5833	26.5833	11803	2.981
2011	130	Malawi	149	Roots and tubers, nes	0.177549	0	0	1.342
2011	157	Nicaragua	149	Roots and tubers, nes	0.299613	0.599227	206.434	4.51
2011	58	Ecuador	149	Roots and tubers, nes	0.485308	168.887	379.025	2.575
2011	48	Costa Rica	149	Roots and tubers, nes	12.6516	37.9548	4301.54	4.51
2011	109	Jamaica	149	Roots and tubers, nes	1.04631	3.13893	170.549	1.94
2011	19	Bolivia	149	Roots and tubers, nes	0.399748	20.7869	328.992	11.75
2011	32	Cameroon	149	Roots and tubers, nes	4.47407	4.47407	2474.16	4.848
2011	170	Peru	149	Roots and tubers, nes	3.95706	530.246	1741.11	7.61
2011	28	Myanmar	15	Wheat	0.0164643	11.6897	32.2206	9.429
2011	185	Russia	15	Wheat	1181.06	35431.7	2.71407e+06	12.681
2011	27	Bulgaria	15	Wheat	767.107	0	1.12841e+06	4.006
2011	159	Nigeria	15	Wheat	0.0151816	31.5018	10.3387	2.328
2011	165	Pakistan	15	Wheat	26.0997	38340.4	16703.8	0.594
2011	19	Bolivia	15	Wheat	0.11681	0	641.752	11.75
2011	84	Greece	15	Wheat	321.499	9323.47	477747	4.259
2011	230	Ukraine	15	Wheat	988.629	18783.9	1.70538e+06	4.3
2011	143	Morocco	15	Wheat	0.293085	71.8059	808.329	0.939
2011	97	Hungary	15	Wheat	1339.29	2678.57	1.25491e+06	4.007
2011	54	Denmark	15	Wheat	25647.8	153887	1.35933e+07	7.856
2011	113	Kyrgyz Republic	15	Wheat	0.24037	150.472	358.873	1.352
2011	138	Mexico	15	Wheat	53.6407	29931.5	17862.4	4.236
2011	211	Switzerland	15	Wheat	286.502	0	199119	1.642
2011	199	Slovak Republic	15	Wheat	862.388	3449.55	803746	3.987
2011	33	Canada	15	Wheat	1591.03	7955.17	2.12562e+06	110.909
2011	98	Croatia	15	Wheat	20.6613	0	26177.9	4.398
2011	231	United States	15	Wheat	1777.69	163547	3.32249e+06	22
2011	102	Iran	15	Wheat	7.2778	NA	NA	0.976
2011	40	Chile	15	Wheat	3.81738	813.101	3893.73	21.914
2011	100	India	15	Wheat	44.067	51602.4	27938.5	0.881
2011	110	Japan	15	Wheat	1.7308	8.65398	1865.8	3.555
2011	234	Uruguay	15	Wheat	22.3753	22.3753	42401.1	14.962
2011	238	Ethiopia	15	Wheat	3.86799	NA	NA	0.815
2011	79	Germany	15	Wheat	52156.8	0	3.12419e+07	3.061
2011	214	Taiwan	15	Wheat	0.0101009	NA	NA	2
2011	3	Albania	15	Wheat	0.0570987	0.799382	63.3796	4.4
2011	251	Zambia	15	Wheat	0.136439	95.9165	24.9683	5.161
2011	59	Egypt	15	Wheat	1.10439	998.371	237.444	1.681
2011	80	Bosnia and Herzegovina	15	Wheat	5.59269	0	9535.53	4.4
2011	203	Spain	15	Wheat	2219.06	106515	3.09337e+06	2.701
2011	184	Rwanda	15	Wheat	0.0294201	0	155.485	0.362
2011	170	Peru	15	Wheat	0.0887949	0	310.871	7.61
2011	63	Estonia	15	Wheat	12152.8	0	2.09027e+07	8.345
2011	117	South Korea	15	Wheat	0.0646637	NA	NA	1.14
2011	169	Paraguay	15	Wheat	7.37386	0	14976.3	15.566
2011	105	Israel	15	Wheat	1.50488	36.117	3169.27	0.486
2011	57	Belarus	15	Wheat	65.1186	0	79249.3	5.092
2011	21	Brazil	15	Wheat	18.4439	18.4439	36684.9	16.749
2011	134	Malta	15	Wheat	0.10586	0	96.2266	NA
2011	194	Saudi Arabia	15	Wheat	0.98487	1076.46	234.399	0.479
2011	255	Belgium	15	Wheat	2945.14	0	1.18689e+06	2.037
2011	44	Colombia	15	Wheat	0.0110153	0	24.4209	9.648
2011	11	Austria	15	Wheat	1261.81	0	865599	2.873
2011	9	Argentina	15	Wheat	86.702	953.722	153463	13.678
2011	126	Lithuania	15	Wheat	4854.98	0	6.10272e+06	8.15
2011	250	Congo, Dem. Rep.	15	Wheat	0.0309778	NA	NA	7.345
2011	106	Italy	15	Wheat	4618.85	73901.5	5.48719e+06	2.273
2011	174	Portugal	15	Wheat	9.12636	1651.87	31057	2.74
2011	183	Romania	15	Wheat	414.742	18663.4	690961	4.002
2011	114	Kenya	15	Wheat	0.023177	0	34.58	1.018
2011	4	Algeria	15	Wheat	0.0666745	4.33384	219.359	0.85
2011	162	Norway	15	Wheat	327.41	0	226895	55.393
2011	156	New Zealand	15	Wheat	38.3798	0	27595.1	58.852
2011	173	Poland	15	Wheat	9034.93	0	1.00739e+07	3.103
2011	141	Mongolia	15	Wheat	0.102924	0	134.213	8.853
2011	10	Australia	15	Wheat	581.238	9299.81	1.16131e+06	53.268
2011	68	France	15	Wheat	42504.9	42504.9	2.46953e+07	5.064
2011	108	Kazakhstan	15	Wheat	777.754	18666.1	2.62881e+06	11.614
2011	212	Syria	15	Wheat	0.900085	396.037	1308.72	0.976
2011	256	Luxembourg	15	Wheat	114.537	0	84986.3	1.954
2011	150	Netherlands	15	Wheat	4949.32	0	2.5291e+06	3.277
2011	52	Azerbaijan	15	Wheat	0.0182141	2.75033	17.6312	1.916
2011	146	Moldova	15	Wheat	64.8204	3629.94	118881	4.089
2011	119	Latvia	15	Wheat	3346.94	0	4.61878e+06	8.345
2011	223	Turkey	15	Wheat	159.091	20681.8	329954	1.801
2011	216	Thailand	15	Wheat	0.26416	0	1102.6	3.613
2011	158	Niger	15	Wheat	0.0199829	11.8499	43.5828	1.614
2011	215	Tanzania	15	Wheat	0.0396334	NA	NA	2.006
2011	121	Lebanon	15	Wheat	0.381499	37.0054	593.613	0.544
2011	104	Ireland	15	Wheat	1069.54	0	440651	19.74
2011	229	United Kingdom	15	Wheat	10237.4	0	4.21783e+06	5.868
2011	16	Bangladesh	15	Wheat	0.422114	142.674	431.4	2.294
2011	167	Czech Republic	15	Wheat	4483.89	0	3.21944e+06	3.932
2011	41	China	15	Wheat	618.638	288285	507902	1.508
2011	210	Sweden	15	Wheat	23291.7	0	1.08772e+07	20.223
2011	202	South Africa	15	Wheat	0.633975	145.814	659.334	2.449
2011	149	Nepal	15	Wheat	0.407221	759.06	527.351	0.716
2011	198	Slovenia	15	Wheat	18.8662	18.8662	21262.3	4.224
2011	272	Serbia	15	Wheat	55.06	NA	NA	4.37
2011	50	Cyprus	15	Wheat	2.18853	308.582	3600.13	NA
2011	222	Tunisia	15	Wheat	0.985943	70.9879	2341.62	0.869
2011	154	NA	15	Wheat	4.74135	NA	NA	NA
2011	101	Indonesia	161	Sugar crops, nes	455.106	0	1.17326e+06	16.287
2011	9	Argentina	162	Sugar Raw Centrifugal	339.573	4584.24	15111	13.678
2011	210	Sweden	162	Sugar Raw Centrifugal	6855.35	10283	246793	20.223
2011	56	Dominican Republic	162	Sugar Raw Centrifugal	52.6786	2633.93	7058.94	1.03
2011	11	Austria	162	Sugar Raw Centrifugal	545.642	1091.28	16369.3	2.873
2011	16	Bangladesh	162	Sugar Raw Centrifugal	0.0164851	0.403885	2.43155	2.294
2011	197	Sierra Leone	162	Sugar Raw Centrifugal	0.147186	2.35497	7.94803	2.658
2011	100	India	162	Sugar Raw Centrifugal	1886.43	132993	115072	0.881
2011	251	Zambia	162	Sugar Raw Centrifugal	309.122	14065.1	5718.76	5.161
2011	44	Colombia	162	Sugar Raw Centrifugal	509.931	2039.72	31870.7	9.648
2011	250	Congo, Dem. Rep.	162	Sugar Raw Centrifugal	0.974172	NA	NA	7.345
2011	59	Egypt	162	Sugar Raw Centrifugal	378.679	59073.9	5490.85	1.681
2011	14	Barbados	162	Sugar Raw Centrifugal	15.9602	0	1907.24	NA
2011	146	Moldova	162	Sugar Raw Centrifugal	101.551	1269.39	8174.87	4.089
2011	10	Australia	162	Sugar Raw Centrifugal	392.659	10405.5	14332.1	53.268
2011	137	Mauritius	162	Sugar Raw Centrifugal	285.662	714.156	19996.4	NA
2011	32	Cameroon	162	Sugar Raw Centrifugal	0.04069	0	23.5392	4.848
2011	60	El Salvador	162	Sugar Raw Centrifugal	200.971	502.429	14771.4	4.51
2011	215	Tanzania	162	Sugar Raw Centrifugal	17.6298	NA	NA	2.006
2011	28	Myanmar	162	Sugar Raw Centrifugal	0.0152582	0.0381456	1.86913	9.429
2011	21	Brazil	162	Sugar Raw Centrifugal	93855.2	234638	5.72516e+06	16.749
2011	130	Malawi	162	Sugar Raw Centrifugal	1103.67	37524.8	35317.4	1.342
2011	95	Honduras	162	Sugar Raw Centrifugal	88.4909	309.718	6592.57	4.51
2011	66	Fiji	162	Sugar Raw Centrifugal	189.425	NA	NA	NA
2011	1	Armenia	162	Sugar Raw Centrifugal	1.2559	0	101.1	1.896
2011	133	Mali	162	Sugar Raw Centrifugal	0.0191128	1.9495	0.745398	3.605
2011	57	Belarus	162	Sugar Raw Centrifugal	1517.09	0	91784.2	5.092
2011	19	Bolivia	162	Sugar Raw Centrifugal	25.4826	114.672	1923.94	11.75
2011	209	Swaziland	162	Sugar Raw Centrifugal	408.517	13481	11234.2	1.163
2011	214	Taiwan	162	Sugar Raw Centrifugal	5.32606	NA	NA	2
2011	110	Japan	162	Sugar Raw Centrifugal	15.2219	38.0548	1697.24	3.555
2011	212	Syria	162	Sugar Raw Centrifugal	0.483055	15.6993	32.3647	0.976
2011	183	Romania	162	Sugar Raw Centrifugal	32.7121	49.0681	3254.85	4.002
2011	101	Indonesia	162	Sugar Raw Centrifugal	97.0996	2233.29	7913.62	16.287
2011	40	Chile	162	Sugar Raw Centrifugal	7.24802	260.929	141.336	21.914
2011	144	Mozambique	162	Sugar Raw Centrifugal	222.225	15222.4	50889.5	3.451
2011	173	Poland	162	Sugar Raw Centrifugal	3949.65	1974.83	181684	3.103
2011	49	Cuba	162	Sugar Raw Centrifugal	206.338	5158.44	36934.4	2.817
2011	48	Costa Rica	162	Sugar Raw Centrifugal	463.259	5559.11	32428.1	4.51
2011	38	Sri Lanka	162	Sugar Raw Centrifugal	0.0229735	1.42436	2.22843	2.1
2011	58	Ecuador	162	Sugar Raw Centrifugal	12.152	449.625	3609.15	2.575
2011	126	Lithuania	162	Sugar Raw Centrifugal	3211.89	0	162201	8.15
2011	23	Belize	162	Sugar Raw Centrifugal	104.475	104.475	12954.9	5.148
2011	33	Canada	162	Sugar Raw Centrifugal	22.9815	0	919.262	110.909
2011	102	Iran	162	Sugar Raw Centrifugal	3.30116	NA	NA	0.976
2011	226	Uganda	162	Sugar Raw Centrifugal	6.3203	0	401.339	1.578
2011	84	Greece	162	Sugar Raw Centrifugal	12.4601	336.423	292.812	4.259
2011	167	Czech Republic	162	Sugar Raw Centrifugal	625.02	0	25625.8	3.932
2011	255	Belgium	162	Sugar Raw Centrifugal	1757.93	0	44827.2	2.037
2011	106	Italy	162	Sugar Raw Centrifugal	122.157	732.943	5497.07	2.273
2011	157	Nicaragua	162	Sugar Raw Centrifugal	140.894	1127.15	10214.8	4.51
2011	165	Pakistan	162	Sugar Raw Centrifugal	53.7716	6210.62	5323.39	0.594
2011	171	Philippines	162	Sugar Raw Centrifugal	116.91	993.731	9469.67	3.939
2011	97	Hungary	162	Sugar Raw Centrifugal	67.4094	33.7047	3201.95	4.007
2011	170	Peru	162	Sugar Raw Centrifugal	23.7102	723.162	569.046	7.61
2011	237	Vietnam	162	Sugar Raw Centrifugal	8.37479	142.371	912.852	3.809
2011	120	Lao	162	Sugar Raw Centrifugal	6.47134	NA	NA	8.865
2011	52	Azerbaijan	162	Sugar Raw Centrifugal	4.47847	181.378	212.727	1.916
2011	185	Russia	162	Sugar Raw Centrifugal	7153.81	46499.8	590190	12.681
2011	199	Slovak Republic	162	Sugar Raw Centrifugal	261.001	1435.51	11745.1	3.987
2011	98	Croatia	162	Sugar Raw Centrifugal	61.5409	0	3538.6	4.398
2011	166	Panama	162	Sugar Raw Centrifugal	50.0198	425.169	5452.16	4.505
2011	234	Uruguay	162	Sugar Raw Centrifugal	1.67506	0.837529	155.78	14.962
2011	114	Kenya	162	Sugar Raw Centrifugal	12.0296	12.0296	571.407	1.018
2011	115	Cambodia	162	Sugar Raw Centrifugal	4.93834	365.437	1424.71	9.505
2011	230	Ukraine	162	Sugar Raw Centrifugal	382.308	573.462	34981.2	4.3
2011	195	Senegal	162	Sugar Raw Centrifugal	0.0752362	2.25709	1.46711	1.544
2011	211	Switzerland	162	Sugar Raw Centrifugal	144.257	0	3678.55	1.642
2011	79	Germany	162	Sugar Raw Centrifugal	21782.2	32673.3	653465	3.061
2011	138	Mexico	162	Sugar Raw Centrifugal	653.757	10787	51646.8	4.236
2011	150	Netherlands	162	Sugar Raw Centrifugal	3535.54	0	97227.5	3.277
2011	181	Zimbabwe	162	Sugar Raw Centrifugal	238.087	9285.41	4880.79	1.66
2011	131	Malaysia	162	Sugar Raw Centrifugal	0.68696	10.9914	67.6655	25.815
2011	158	Niger	162	Sugar Raw Centrifugal	8.41501	1220.18	420.751	1.614
2011	113	Kyrgyz Republic	162	Sugar Raw Centrifugal	0.0351528	0.843666	1.45884	1.352
2011	91	Guyana	162	Sugar Raw Centrifugal	745.832	4847.91	63395.7	127.073
2011	53	Benin	162	Sugar Raw Centrifugal	0.0837585	3.18282	10.7211	2.331
2011	203	Spain	162	Sugar Raw Centrifugal	207.34	14721.1	10678	2.701
2011	238	Ethiopia	162	Sugar Raw Centrifugal	0.0789557	NA	NA	0.815
2011	41	China	162	Sugar Raw Centrifugal	158.895	476.686	25184.9	1.508
2011	223	Turkey	162	Sugar Raw Centrifugal	97.6779	4297.83	2734.98	1.801
2011	54	Denmark	162	Sugar Raw Centrifugal	3790.29	0	108023	7.856
2011	231	United States	162	Sugar Raw Centrifugal	1967.94	61990.1	239105	22
2011	123	Liberia	162	Sugar Raw Centrifugal	0.0373374	0	23.3172	5.57
2011	68	France	162	Sugar Raw Centrifugal	6563.87	3281.94	141123	5.064
2011	236	Venezuela	162	Sugar Raw Centrifugal	8.15812	NA	NA	17.1
2011	109	Jamaica	162	Sugar Raw Centrifugal	100.852	1361.51	10438.2	1.94
2011	207	Suriname	162	Sugar Raw Centrifugal	1.49976	0	217.465	121.744
2011	107	Cote d'Ivoire	162	Sugar Raw Centrifugal	0.0518787	NA	NA	2.937
2011	108	Kazakhstan	162	Sugar Raw Centrifugal	0.908793	108.146	54.982	11.614
2011	229	United Kingdom	162	Sugar Raw Centrifugal	1544.43	772.215	50966.2	5.868
2011	149	Nepal	162	Sugar Raw Centrifugal	0.461963	16.8617	69.5255	0.716
2011	89	Guatemala	162	Sugar Raw Centrifugal	493.247	3206.11	31567.8	4.459
2011	202	South Africa	162	Sugar Raw Centrifugal	913.476	12788.7	54351.8	2.449
2011	143	Morocco	162	Sugar Raw Centrifugal	13.0716	1477.1	562.081	0.939
2011	129	Madagascar	162	Sugar Raw Centrifugal	2489.79	47306.1	357285	5.758
2011	154	NA	162	Sugar Raw Centrifugal	0.0177244	NA	NA	NA
2011	272	Serbia	162	Sugar Raw Centrifugal	128.442	NA	NA	4.37
2011	169	Paraguay	162	Sugar Raw Centrifugal	125.769	1446.34	14023.2	15.566
2011	216	Thailand	162	Sugar Raw Centrifugal	1138.39	24475.5	118962	3.613
2011	59	Egypt	176	Beans, dry	0.133322	252.245	41.9963	1.681
2011	173	Poland	176	Beans, dry	0.162281	0	185.649	3.103
2011	84	Greece	176	Beans, dry	0.0734393	22.1052	53.3169	4.259
2011	158	Niger	176	Beans, dry	0.116938	0	583.168	1.614
2011	104	Ireland	176	Beans, dry	3.15177	0	1150.4	19.74
2011	63	Estonia	176	Beans, dry	0.260397	0	261.179	8.345
2011	101	Indonesia	176	Beans, dry	0.046048	4.83504	154.215	16.287
2011	129	Madagascar	176	Beans, dry	0.339492	0	546.583	5.758
2011	126	Lithuania	176	Beans, dry	4.44544	0	4934.44	8.15
2011	210	Sweden	176	Beans, dry	3.09997	0	4132.26	20.223
2011	238	Ethiopia	176	Beans, dry	4.96463	NA	NA	0.815
2011	113	Kyrgyz Republic	176	Beans, dry	2.43746	233.997	2149.84	1.352
2011	9	Argentina	176	Beans, dry	4.02834	116.822	4459.37	13.678
2011	95	Honduras	176	Beans, dry	0.0195973	0.0587919	83.3277	4.51
2011	60	El Salvador	176	Beans, dry	0.0286343	0	118.718	4.51
2011	138	Mexico	176	Beans, dry	0.151291	26.3246	660.99	4.236
2011	255	Belgium	176	Beans, dry	0.0922764	0	66.6236	2.037
2011	157	Nicaragua	176	Beans, dry	0.0250297	6.83312	182.342	4.51
2011	119	Latvia	176	Beans, dry	3.14521	0	3321.34	8.345
2011	72	Djibouti	176	Beans, dry	0.02365	34.9311	154.671	0.92
2011	226	Uganda	176	Beans, dry	0.271957	0	1534.38	1.578
2011	57	Belarus	176	Beans, dry	0.399786	0.399786	557.702	5.092
2011	106	Italy	176	Beans, dry	0.214813	0	273.887	2.273
2011	116	North Korea	176	Beans, dry	0.0368504	NA	NA	1.141
2011	100	India	176	Beans, dry	0.736908	123.064	6485.52	0.881
2011	97	Hungary	176	Beans, dry	0.032138	3.50304	59.4231	4.007
2011	102	Iran	176	Beans, dry	0.0329538	NA	NA	0.976
2011	21	Brazil	176	Beans, dry	0.108728	6.74115	300.199	16.749
2011	216	Thailand	176	Beans, dry	1.44997	0	6047.84	3.613
2011	183	Romania	176	Beans, dry	0.0303499	0	53.7194	4.002
2011	41	China	176	Beans, dry	32.0332	0	60734.9	1.508
2011	68	France	176	Beans, dry	0.174887	6.64572	150.578	5.064
2011	150	Netherlands	176	Beans, dry	4.86659	0	2992.96	3.277
2011	165	Pakistan	176	Beans, dry	0.0108021	13.8807	50.2623	0.594
2011	203	Spain	176	Beans, dry	0.911998	196.08	1784.78	2.701
2011	40	Chile	176	Beans, dry	0.436949	11.3607	373.591	21.914
2011	231	United States	176	Beans, dry	8.95531	3832.87	10889.7	22
2011	58	Ecuador	176	Beans, dry	0.0238329	13.2749	99.8122	2.575
2011	237	Vietnam	176	Beans, dry	0.0259887	0	108.191	3.809
2011	10	Australia	176	Beans, dry	0.568137	0	1935.64	53.268
2011	19	Bolivia	176	Beans, dry	0.169478	0	245.912	11.75
2011	28	Myanmar	176	Beans, dry	3.06541	0	11050.8	9.429
2011	215	Tanzania	176	Beans, dry	3.09949	NA	NA	2.006
2011	223	Turkey	176	Beans, dry	4.46108	753.923	4394.17	1.801
2011	114	Kenya	176	Beans, dry	0.0158356	0	131.737	1.018
2011	230	Ukraine	176	Beans, dry	0.221842	0	304.146	4.3
2011	23	Belize	176	Beans, dry	0.0580132	0	228.572	5.148
2011	174	Portugal	176	Beans, dry	0.0366686	0	118.953	2.74
2011	234	Uruguay	176	Beans, dry	0.0129863	0	32.8034	14.962
2011	170	Peru	176	Beans, dry	1.13753	1002.16	1861	7.61
2011	121	Lebanon	176	Beans, dry	0.038782	0	17.0253	0.544
2011	33	Canada	176	Beans, dry	8.6245	0	9780.18	110.909
2011	11	Austria	181	Broad beans, horse beans, dry	1.69294	0	1361.12	2.873
2011	126	Lithuania	181	Broad beans, horse beans, dry	0.0797853	0	0	8.15
2011	79	Germany	181	Broad beans, horse beans, dry	42.1746	0	21213.8	3.061
2011	41	China	181	Broad beans, horse beans, dry	0.613695	0	776.324	1.508
2011	19	Bolivia	181	Broad beans, horse beans, dry	0.0218694	0	34.0944	11.75
2011	97	Hungary	181	Broad beans, horse beans, dry	0.0294488	4.27008	51.5355	4.007
2011	150	Netherlands	181	Broad beans, horse beans, dry	1.31348	0	370.402	3.277
2011	229	United Kingdom	181	Broad beans, horse beans, dry	7.45115	0	5446.79	5.868
2011	10	Australia	181	Broad beans, horse beans, dry	2.66011	0	3069.76	53.268
2011	138	Mexico	181	Broad beans, horse beans, dry	0.0171686	2.47227	58.6994	4.236
2011	223	Turkey	181	Broad beans, horse beans, dry	1.93953	186.195	1518.65	1.801
2011	255	Belgium	181	Broad beans, horse beans, dry	0.0350329	0	0	2.037
2011	68	France	181	Broad beans, horse beans, dry	0.515572	14.436	228.914	5.064
2011	106	Italy	181	Broad beans, horse beans, dry	0.0539459	0	62.3615	2.273
2011	121	Lebanon	181	Broad beans, horse beans, dry	0.153461	0	66.1415	0.544
2011	230	Ukraine	181	Broad beans, horse beans, dry	0.0228218	0	31.3115	4.3
2011	173	Poland	181	Broad beans, horse beans, dry	0.0751014	0	0	3.103
2011	59	Egypt	181	Broad beans, horse beans, dry	0.301392	465.952	73.2382	1.681
2011	143	Morocco	181	Broad beans, horse beans, dry	0.178658	88.9716	384.293	0.939
2011	167	Czech Republic	181	Broad beans, horse beans, dry	0.151632	0	188.175	3.932
2011	203	Spain	181	Broad beans, horse beans, dry	0.0399543	5.75341	70.1197	2.701
2011	170	Peru	181	Broad beans, horse beans, dry	1.4381	1209.44	1721.4	7.61
2011	89	Guatemala	181	Broad beans, horse beans, dry	0.0100945	0	47.5045	4.459
2011	23	Belize	187	Peas, dry	0.0328129	0	75.6666	5.148
2011	158	Niger	187	Peas, dry	0.033765	0	254.351	1.614
2011	106	Italy	187	Peas, dry	3.3136	0	2723.78	2.273
2011	146	Moldova	187	Peas, dry	6.02751	385.761	11681.3	4.089
2011	130	Malawi	187	Peas, dry	0.302131	0	513.019	1.342
2011	27	Bulgaria	187	Peas, dry	0.0163239	0	21.9883	4.006
2011	167	Czech Republic	187	Peas, dry	48.1745	0	50342.3	3.932
2011	215	Tanzania	187	Peas, dry	0.138174	NA	NA	2.006
2011	198	Slovenia	187	Peas, dry	0.422015	0	327.484	4.224
2011	183	Romania	187	Peas, dry	1.72387	0	2573.73	4.002
2011	119	Latvia	187	Peas, dry	3.97042	0	5471.24	8.345
2011	129	Madagascar	187	Peas, dry	0.189053	0	91.8795	5.758
2011	199	Slovak Republic	187	Peas, dry	9.12673	0	11298.9	3.987
2011	63	Estonia	187	Peas, dry	137.141	0	202969	8.345
2011	255	Belgium	187	Peas, dry	6.04418	0	3197.37	2.037
2011	41	China	187	Peas, dry	0.780925	0	1579.81	1.508
2011	156	New Zealand	187	Peas, dry	73.0094	0	33438.3	58.852
2011	84	Greece	187	Peas, dry	0.0129834	2.28508	10.971	4.259
2011	185	Russia	187	Peas, dry	52.1179	2918.6	87089	12.681
2011	57	Belarus	187	Peas, dry	0.391184	0.391184	548.831	5.092
2011	256	Luxembourg	187	Peas, dry	0.119993	0	90.7145	1.954
2011	173	Poland	187	Peas, dry	0.853445	0	958.419	3.103
2011	28	Myanmar	187	Peas, dry	0.683078	0	2864.14	9.429
2011	222	Tunisia	187	Peas, dry	0.0118263	0.650448	34.2845	0.869
2011	11	Austria	187	Peas, dry	10.4152	0	8498.82	2.873
2011	170	Peru	187	Peas, dry	0.205112	169.832	294.95	7.61
2011	223	Turkey	187	Peas, dry	0.0115565	1.01698	10.0658	1.801
2011	9	Argentina	187	Peas, dry	3.5952	82.6897	4601.86	13.678
2011	203	Spain	187	Peas, dry	15.6541	1455.83	28631.4	2.701
2011	33	Canada	187	Peas, dry	55.5432	0	66596.3	110.909
2011	10	Australia	187	Peas, dry	8.9087	0	13238.3	53.268
2011	210	Sweden	187	Peas, dry	140.815	0	111526	20.223
2011	231	United States	187	Peas, dry	11.6845	560.857	12350.5	22
2011	97	Hungary	187	Peas, dry	63.8505	4916.49	72406.5	4.007
2011	79	Germany	187	Peas, dry	209.473	0	153963	3.061
2011	162	Norway	187	Peas, dry	0.951742	0	0	55.393
2011	211	Switzerland	187	Peas, dry	1.74615	0	1148.96	1.642
2011	108	Kazakhstan	187	Peas, dry	4.70939	0	10031	11.614
2011	68	France	187	Peas, dry	417.286	10849.4	203636	5.064
2011	126	Lithuania	187	Peas, dry	42.8068	0	62241.1	8.15
2011	229	United Kingdom	187	Peas, dry	53.1068	0	30801.9	5.868
2011	238	Ethiopia	187	Peas, dry	0.336808	NA	NA	0.815
2011	100	India	187	Peas, dry	0.0634786	5.3322	255.565	0.881
2011	150	Netherlands	187	Peas, dry	6.64352	0	3374.91	3.277
2011	272	Serbia	187	Peas, dry	0.0217648	NA	NA	4.37
2011	54	Denmark	187	Peas, dry	90.5471	0	51249.7	7.856
2011	104	Ireland	187	Peas, dry	0.924184	0	442.684	19.74
2011	230	Ukraine	187	Peas, dry	23.8902	0	37842.1	4.3
2011	100	India	191	Chick peas	9.59898	825.512	30505.5	0.881
2011	170	Peru	191	Chick peas	0.0163629	4.59797	14.563	7.61
2011	106	Italy	191	Chick peas	1.46469	0	2613.01	2.273
2011	130	Malawi	191	Chick peas	0.336649	0	629.198	1.342
2011	143	Morocco	191	Chick peas	0.0882672	15.535	270.451	0.939
2011	138	Mexico	191	Chick peas	6.19271	297.25	8106.26	4.236
2011	80	Bosnia and Herzegovina	191	Chick peas	0.0214274	0	29.0127	4.4
2011	102	Iran	191	Chick peas	0.148822	NA	NA	0.976
2011	223	Turkey	191	Chick peas	26.864	2847.59	57892	1.801
2011	33	Canada	191	Chick peas	3.20251	0	5508.32	110.909
2011	212	Syria	191	Chick peas	0.0107172	0.750203	22.1631	0.976
2011	174	Portugal	191	Chick peas	0.0240817	0	80.481	2.74
2011	231	United States	191	Chick peas	4.00156	0	7274.83	22
2011	121	Lebanon	191	Chick peas	0.367561	0	370.869	0.544
2011	185	Russia	191	Chick peas	14.1525	651.013	28828.6	12.681
2011	9	Argentina	191	Chick peas	4.45665	57.9364	4933.51	13.678
2011	41	China	191	Chick peas	0.0356746	0	22.0112	1.508
2011	215	Tanzania	191	Chick peas	0.397501	NA	NA	2.006
2011	108	Kazakhstan	191	Chick peas	0.0452104	0	82.5543	11.614
2011	10	Australia	191	Chick peas	8.34035	0	10125.2	53.268
2011	203	Spain	191	Chick peas	1.76479	79.4157	5347.33	2.701
2011	28	Myanmar	191	Chick peas	0.0672677	0	176.309	9.429
2011	222	Tunisia	191	Chick peas	0.0556466	0.8347	163.657	0.869
2011	238	Ethiopia	191	Chick peas	1.28341	NA	NA	0.815
2011	68	France	201	Lentils	1.50148	235.732	3346.79	5.064
2011	33	Canada	201	Lentils	67.2067	0	162035	110.909
2011	223	Turkey	201	Lentils	52.9367	19745.4	85916.2	1.801
2011	238	Ethiopia	201	Lentils	0.0428358	NA	NA	0.815
2011	41	China	201	Lentils	7.2256	0	22536.6	1.508
2011	59	Egypt	201	Lentils	0.0107749	50.351	7.1222	1.681
2011	130	Malawi	201	Lentils	0.324398	0	515.469	1.342
2011	9	Argentina	201	Lentils	0.25144	8.29753	471.953	13.678
2011	84	Greece	201	Lentils	0.0113793	7.37378	17.911	4.259
2011	230	Ukraine	201	Lentils	0.0327846	0	177.299	4.3
2011	102	Iran	201	Lentils	0.0226054	NA	NA	0.976
2011	185	Russia	201	Lentils	1.31776	216.113	5504.29	12.681
2011	231	United States	201	Lentils	13.2576	0	23625	22
2011	121	Lebanon	201	Lentils	0.260358	0	258.535	0.544
2011	212	Syria	201	Lentils	0.219868	64.2015	347.831	0.976
2011	106	Italy	201	Lentils	0.300281	0	1388.2	2.273
2011	203	Spain	201	Lentils	1.56682	687.835	6671.53	2.701
2011	28	Myanmar	201	Lentils	0.196471	0.196471	2234.46	9.429
2011	100	India	201	Lentils	0.783293	264.753	6008.64	0.881
2011	10	Australia	201	Lentils	3.48976	0	8919.82	53.268
2011	59	Egypt	211	Pulses, nes	0.0348736	87.742	16.7742	1.681
2011	170	Peru	211	Pulses, nes	0.0503582	13.6974	132.341	7.61
2011	27	Bulgaria	211	Pulses, nes	0.0436907	0	0	4.006
2011	54	Denmark	211	Pulses, nes	26.8252	0	15719.6	7.856
2011	68	France	211	Pulses, nes	21.9667	856.703	12608.9	5.064
2011	79	Germany	211	Pulses, nes	58.0565	0	69087.3	3.061
2011	256	Luxembourg	211	Pulses, nes	0.116603	0.116603	127.913	1.954
2011	11	Austria	211	Pulses, nes	47.6562	0	65003	2.873
2011	230	Ukraine	211	Pulses, nes	0.0430861	0	85.1381	4.3
2011	143	Morocco	211	Pulses, nes	0.115005	51.9821	275.781	0.939
2011	158	Niger	211	Pulses, nes	0.792757	0	757.083	1.614
2011	203	Spain	211	Pulses, nes	48.4425	11044.9	168095	2.701
2011	198	Slovenia	211	Pulses, nes	0.570511	0	674.915	4.224
2011	154	NA	211	Pulses, nes	0.0486138	NA	NA	NA
2011	126	Lithuania	211	Pulses, nes	50.9488	0	61597.1	8.15
2011	185	Russia	211	Pulses, nes	0.0796862	8.92486	222.245	12.681
2011	41	China	211	Pulses, nes	1.16911	0	1719.76	1.508
2011	222	Tunisia	211	Pulses, nes	0.0438251	1.88448	74.3712	0.869
2011	223	Turkey	211	Pulses, nes	0.333679	85.7555	682.374	1.801
2011	84	Greece	211	Pulses, nes	1.35799	472.58	1739.58	4.259
2011	229	United Kingdom	211	Pulses, nes	184.436	0	105313	5.868
2011	165	Pakistan	211	Pulses, nes	0.0434252	12.8973	50.243	0.594
2011	106	Italy	211	Pulses, nes	3.83264	0	0	2.273
2011	173	Poland	211	Pulses, nes	431.64	0	458834	3.103
2011	199	Slovak Republic	211	Pulses, nes	0.377222	0	541.314	3.987
2011	100	India	211	Pulses, nes	2.41851	831.967	5061.94	0.881
2011	167	Czech Republic	211	Pulses, nes	8.47321	0	14031.6	3.932
2011	21	Brazil	216	Brazil nuts, with shell	1.58206	0	0	16.749
2011	170	Peru	216	Brazil nuts, with shell	2.74272	0	71316.2	7.61
2011	19	Bolivia	216	Brazil nuts, with shell	67.8519	0	0	11.75
2011	215	Tanzania	217	Cashew nuts, with shell	16.6872	NA	NA	2.006
2011	107	Cote d'Ivoire	217	Cashew nuts, with shell	50.474	NA	NA	2.937
2011	175	Guinea-Bissau	217	Cashew nuts, with shell	13.2363	NA	NA	5.398
2011	90	Guinea	217	Cashew nuts, with shell	2.0518	84.124	18408.8	2.492
2011	60	El Salvador	217	Cashew nuts, with shell	0.0777903	0	864.173	4.51
2011	100	India	217	Cashew nuts, with shell	64.3441	135058	741373	0.881
2011	38	Sri Lanka	217	Cashew nuts, with shell	0.27364	0	11318	2.1
2011	144	Mozambique	217	Cashew nuts, with shell	10.1663	0	54501.4	3.451
2011	217	Togo	217	Cashew nuts, with shell	25.0834	1956.51	190233	1.598
2011	81	Ghana	217	Cashew nuts, with shell	12.1224	0	270900	2.981
2011	129	Madagascar	217	Cashew nuts, with shell	0.347303	0	6705.73	5.758
2011	237	Vietnam	217	Cashew nuts, with shell	351.326	18268.9	1.5497e+06	3.809
2011	114	Kenya	217	Cashew nuts, with shell	0.226459	4.52917	255.898	1.018
2011	216	Thailand	217	Cashew nuts, with shell	0.18545	155.593	1754.17	3.613
2011	133	Mali	217	Cashew nuts, with shell	0.28415	0	0	3.605
2011	171	Philippines	217	Cashew nuts, with shell	0.0453097	0	287.309	3.939
2011	21	Brazil	217	Cashew nuts, with shell	19.5974	97712.8	539772	16.749
2011	233	Burkina Faso	217	Cashew nuts, with shell	29.8849	27374.6	482313	0.973
2011	41	China	217	Cashew nuts, with shell	0.0353349	39.0804	700.267	1.508
2011	95	Honduras	217	Cashew nuts, with shell	0.0631697	23.6255	397.085	4.51
2011	131	Malaysia	217	Cashew nuts, with shell	0.0857539	0	570.864	25.815
2011	159	Nigeria	217	Cashew nuts, with shell	2.06737	97.1662	9735.22	2.328
2011	138	Mexico	217	Cashew nuts, with shell	0.022908	75.0467	143.84	4.236
2011	101	Indonesia	217	Cashew nuts, with shell	11.5454	0	719373	16.287
2011	53	Benin	217	Cashew nuts, with shell	11.464	57.3198	427354	2.331
2011	195	Senegal	217	Cashew nuts, with shell	1.73519	5306.21	28399.9	1.544
2011	28	Myanmar	217	Cashew nuts, with shell	0.122828	0	0	9.429
2011	170	Peru	217	Cashew nuts, with shell	0.0182446	10.4542	18.5548	7.61
2011	75	Gambia	217	Cashew nuts, with shell	2.37528	0	0	2.186
2011	68	France	220	Chestnut	0.734754	449.669	2447.46	5.064
2011	173	Poland	220	Chestnut	0.0119355	0	0	3.103
2011	117	South Korea	220	Chestnut	0.0686947	NA	NA	1.14
2011	27	Bulgaria	220	Chestnut	0.0108048	0.49702	10.3186	4.006
2011	3	Albania	220	Chestnut	0.0344006	40.0767	76.8854	4.4
2011	154	NA	220	Chestnut	0.01352	NA	NA	NA
2011	223	Turkey	220	Chestnut	0.142494	112	538.626	1.801
2011	203	Spain	220	Chestnut	0.837775	1027.95	3018.5	2.701
2011	174	Portugal	220	Chestnut	0.376608	242.912	2318.4	2.74
2011	106	Italy	220	Chestnut	2.0678	1038.04	5295.64	2.273
2011	41	China	220	Chestnut	11.5954	626.154	15479.9	1.508
2011	84	Greece	220	Chestnut	0.0183992	14.6458	48.4083	4.259
2011	80	Bosnia and Herzegovina	220	Chestnut	0.039696	0	0	4.4
2011	107	Cote d'Ivoire	221	Almonds, with shell	0.0546065	NA	NA	2.937
2011	203	Spain	221	Almonds, with shell	170.763	170763	2.23341e+06	2.701
2011	106	Italy	221	Almonds, with shell	154.112	116046	707990	2.273
2011	27	Bulgaria	221	Almonds, with shell	0.0125043	1.43799	171.346	4.006
2011	102	Iran	221	Almonds, with shell	0.177253	NA	NA	0.976
2011	222	Tunisia	221	Almonds, with shell	0.140334	273.651	2492.75	0.869
2011	165	Pakistan	221	Almonds, with shell	0.0427094	49.8846	54.1129	0.594
2011	2	Afghanistan	221	Almonds, with shell	0.0318614	162.716	63.5636	0.853
2011	40	Chile	221	Almonds, with shell	2.39788	4198.69	10627.4	21.914
2011	41	China	221	Almonds, with shell	0.189798	19.5492	595.966	1.508
2011	84	Greece	221	Almonds, with shell	0.212014	181.696	592.156	4.259
2011	223	Turkey	221	Almonds, with shell	0.284142	105.133	567.717	1.801
2011	212	Syria	221	Almonds, with shell	0.565251	270.755	478.202	0.976
2011	174	Portugal	221	Almonds, with shell	0.838528	965.985	10790.2	2.74
2011	10	Australia	221	Almonds, with shell	12.0715	16187.8	29514.7	53.268
2011	143	Morocco	221	Almonds, with shell	2.39872	3108.74	20489.8	0.939
2011	231	United States	221	Almonds, with shell	614.319	1.25198e+06	719367	22
2011	235	Uzbekistan	221	Almonds, with shell	0.0464416	127.807	81.7372	1.147
2011	124	Libya	221	Almonds, with shell	0.0109814	124.519	71.5551	1.143
2011	121	Lebanon	221	Almonds, with shell	0.0183166	12.2355	15.0929	0.544
2011	68	France	221	Almonds, with shell	1.29771	290.687	2072.44	5.064
2011	50	Cyprus	222	Walnuts, with shell	0.0170872	229.55	104.283	NA
2011	79	Germany	222	Walnuts, with shell	22.082	198.738	38356.4	3.061
2011	84	Greece	222	Walnuts, with shell	0.0220444	14.3729	47.5717	4.259
2011	165	Pakistan	222	Walnuts, with shell	0.0134899	6.97428	6.59656	0.594
2011	11	Austria	222	Walnuts, with shell	0.434314	44.3	1000.66	2.873
2011	223	Turkey	222	Walnuts, with shell	0.56805	321.516	1546.8	1.801
2011	230	Ukraine	222	Walnuts, with shell	10.2038	0	13060.8	4.3
2011	113	Kyrgyz Republic	222	Walnuts, with shell	0.266534	247.876	371.548	1.352
2011	57	Belarus	222	Walnuts, with shell	0.831446	0	1844.98	5.092
2011	10	Australia	222	Walnuts, with shell	0.087914	0	0	53.268
2011	199	Slovak Republic	222	Walnuts, with shell	0.0649319	12.1423	356.022	3.987
2011	9	Argentina	222	Walnuts, with shell	0.361942	326.833	1098.85	13.678
2011	97	Hungary	222	Walnuts, with shell	1.41309	161.092	6809.67	4.007
2011	27	Bulgaria	222	Walnuts, with shell	0.268625	20.6841	2011.2	4.006
2011	68	France	222	Walnuts, with shell	23.8436	14139.3	76895.6	5.064
2011	106	Italy	222	Walnuts, with shell	2.97768	1057.08	5392.58	2.273
2011	121	Lebanon	222	Walnuts, with shell	0.0151235	14.2312	16.651	0.544
2011	198	Slovenia	222	Walnuts, with shell	0.0232642	0.162849	4.74589	4.224
2011	102	Iran	222	Walnuts, with shell	0.190373	NA	NA	0.976
2011	41	China	222	Walnuts, with shell	2.83752	462.516	11367.1	1.508
2011	173	Poland	222	Walnuts, with shell	2.48859	2.48859	5853.16	3.103
2011	203	Spain	222	Walnuts, with shell	1.35597	1054.94	3097.03	2.701
2011	183	Romania	222	Walnuts, with shell	1.06106	3.18319	390.471	4.002
2011	138	Mexico	222	Walnuts, with shell	5.56067	17060.1	32296.4	4.236
2011	21	Brazil	222	Walnuts, with shell	0.091162	10.5748	674.143	16.749
2011	73	Georgia	222	Walnuts, with shell	0.117258	44.089	438.545	2.01
2011	272	Serbia	222	Walnuts, with shell	0.0140279	NA	NA	4.37
2011	40	Chile	222	Walnuts, with shell	18.576	60464.9	81827.3	21.914
2011	146	Moldova	222	Walnuts, with shell	6.48607	395.65	14048.8	4.089
2011	255	Belgium	222	Walnuts, with shell	0.0174277	0.174277	43.4995	2.037
2011	235	Uzbekistan	222	Walnuts, with shell	0.322009	619.545	367.09	1.147
2011	231	United States	222	Walnuts, with shell	81.9938	162266	112659	22
2011	100	India	222	Walnuts, with shell	9.32898	14655.8	83373.1	0.881
2011	167	Czech Republic	222	Walnuts, with shell	0.0424189	4.28431	151.011	3.932
2011	2	Afghanistan	223	Pistachios	2.02004	20014.6	5730.86	0.853
2011	106	Italy	223	Pistachios	0.234986	369.632	1488.4	2.273
2011	212	Syria	223	Pistachios	0.275329	490.912	586.727	0.976
2011	84	Greece	223	Pistachios	0.26998	230.833	571.817	4.259
2011	223	Turkey	223	Pistachios	0.660916	491.722	1841.97	1.801
2011	41	China	223	Pistachios	1.96692	357.98	6412.17	1.508
2011	102	Iran	223	Pistachios	42.5607	NA	NA	0.976
2011	231	United States	223	Pistachios	182.966	394840	174000	22
2011	106	Italy	225	Hazelnuts, with shell	25.7598	19371.4	98866.3	2.273
2011	203	Spain	225	Hazelnuts, with shell	1.44087	3087.79	9065.99	2.701
2011	52	Azerbaijan	225	Hazelnuts, with shell	2.07206	5088.97	12306	1.916
2011	102	Iran	225	Hazelnuts, with shell	0.177227	NA	NA	0.976
2011	98	Croatia	225	Hazelnuts, with shell	0.0126682	0.114014	60.8327	4.398
2011	68	France	225	Hazelnuts, with shell	1.45605	815.389	4438.04	5.064
2011	173	Poland	225	Hazelnuts, with shell	5.27448	10.549	23487.3	3.103
2011	231	United States	225	Hazelnuts, with shell	0.109894	279.35	196.38	22
2011	73	Georgia	225	Hazelnuts, with shell	20.0472	7938.68	79005.9	2.01
2011	223	Turkey	225	Hazelnuts, with shell	81.3335	62870.8	302479	1.801
2011	90	Guinea	234	Nuts, nes	0.223498	0	0	2.492
2011	2	Afghanistan	234	Nuts, nes	0.0620107	584.203	195.83	0.853
2011	238	Ethiopia	234	Nuts, nes	0.0160653	NA	NA	0.815
2011	105	Israel	234	Nuts, nes	6.79507	36815.7	15424.8	0.486
2011	230	Ukraine	234	Nuts, nes	0.0790486	0	441.328	4.3
2011	171	Philippines	234	Nuts, nes	58.6789	0	685370	3.939
2011	3	Albania	234	Nuts, nes	1.01349	2874.25	5512.35	4.4
2011	185	Russia	234	Nuts, nes	52.0719	0	94198	12.681
2011	89	Guatemala	234	Nuts, nes	5.66956	85.0434	13368.8	4.459
2011	231	United States	234	Nuts, nes	230.361	548720	475926	22
2011	141	Mongolia	234	Nuts, nes	2.04355	1452.97	4207.68	8.853
2011	10	Australia	234	Nuts, nes	58.7343	84224.9	108600	53.268
2011	44	Colombia	234	Nuts, nes	0.137154	8.64073	530.925	9.648
2011	102	Iran	234	Nuts, nes	5.66806	NA	NA	0.976
2011	235	Uzbekistan	234	Nuts, nes	0.132042	279.137	165.449	1.147
2011	48	Costa Rica	234	Nuts, nes	0.0635962	67.8572	1204.7	4.51
2011	237	Vietnam	234	Nuts, nes	1.54452	94.2154	10422.4	3.809
2011	216	Thailand	234	Nuts, nes	58.1473	41517.2	567344	3.613
2011	202	South Africa	234	Nuts, nes	123.067	248964	243057	2.449
2011	114	Kenya	234	Nuts, nes	17.0821	563.708	33754.2	1.018
2011	41	China	234	Nuts, nes	250.35	24534.3	601590	1.508
2011	81	Ghana	234	Nuts, nes	0.1114	0	8450.28	2.981
2011	21	Brazil	234	Nuts, nes	14.1655	16701.1	196149	16.749
2011	195	Senegal	234	Nuts, nes	0.120378	100.155	577.815	1.544
2011	133	Mali	234	Nuts, nes	0.0878207	172.831	835.526	3.605
2011	143	Morocco	234	Nuts, nes	0.464631	0	0	0.939
2011	223	Turkey	234	Nuts, nes	1102.79	491842	2.36217e+06	1.801
2011	198	Slovenia	234	Nuts, nes	0.188013	2.06815	415.134	4.224
2011	138	Mexico	234	Nuts, nes	80.3852	194452	482874	4.236
2011	73	Georgia	234	Nuts, nes	2.11739	1092.57	10889.7	2.01
2011	181	Zimbabwe	234	Nuts, nes	5.04769	4669.11	32991.7	1.66
2011	203	Spain	234	Nuts, nes	52.6262	41416.8	121514	2.701
2011	52	Azerbaijan	234	Nuts, nes	9.90893	17201.9	41587.8	1.916
2011	174	Portugal	234	Nuts, nes	175.011	129683	1.23838e+06	2.74
2011	215	Tanzania	234	Nuts, nes	3.25809	NA	NA	2.006
2011	101	Indonesia	234	Nuts, nes	77.5195	0	2.70504e+06	16.287
2011	106	Italy	234	Nuts, nes	6.93951	5260.15	26869.8	2.273
2011	117	South Korea	234	Nuts, nes	0.312234	NA	NA	1.14
2011	59	Egypt	234	Nuts, nes	7.38004	36974	7453.84	1.681
2011	116	North Korea	234	Nuts, nes	9.83962	NA	NA	1.141
2011	32	Cameroon	234	Nuts, nes	0.082519	0	0	4.848
2011	57	Belarus	234	Nuts, nes	2.4642	0	8346.25	5.092
2011	170	Peru	234	Nuts, nes	1.13744	2355.64	4859.14	7.61
2011	159	Nigeria	234	Nuts, nes	0.0803077	3.69415	400.655	2.328
2011	173	Poland	234	Nuts, nes	0.176414	0	0	3.103
2011	121	Lebanon	234	Nuts, nes	46.0606	66603.6	77796.3	0.544
2011	27	Bulgaria	234	Nuts, nes	5.45104	174.433	16789.2	4.006
2011	146	Moldova	234	Nuts, nes	1.53896	116.961	4125.95	4.089
2011	222	Tunisia	234	Nuts, nes	0.0413445	0	0	0.869
2011	212	Syria	234	Nuts, nes	5.93555	4867.15	8066.41	0.976
2011	40	Chile	234	Nuts, nes	1.42009	0	0	21.914
2011	165	Pakistan	234	Nuts, nes	8.55138	23807	22524.3	0.594
2011	107	Cote d'Ivoire	234	Nuts, nes	0.646078	NA	NA	2.937
2011	113	Kyrgyz Republic	234	Nuts, nes	0.105094	345.863	519.372	1.352
2011	129	Madagascar	234	Nuts, nes	0.0105992	0	0	5.758
2011	130	Malawi	234	Nuts, nes	14.975	26266.1	99763.4	1.342
2011	110	Japan	236	Soybeans	0.739388	0	2185.63	3.555
2011	80	Bosnia and Herzegovina	236	Soybeans	0.332818	0	811.078	4.4
2011	202	South Africa	236	Soybeans	2.39807	211.03	6568.3	2.449
2011	84	Greece	236	Soybeans	0.629787	35.2681	788.494	4.259
2011	100	India	236	Soybeans	619.032	14237.7	2.62593e+06	0.881
2011	173	Poland	236	Soybeans	0.460562	0	1751.52	3.103
2011	102	Iran	236	Soybeans	0.23256	NA	NA	0.976
2011	185	Russia	236	Soybeans	232.264	0	930681	12.681
2011	117	South Korea	236	Soybeans	0.153949	NA	NA	1.14
2011	230	Ukraine	236	Soybeans	531.587	0	1.54479e+06	4.3
2011	237	Vietnam	236	Soybeans	0.0796169	0	226.032	3.809
2011	11	Austria	236	Soybeans	171.059	0	277287	2.873
2011	101	Indonesia	236	Soybeans	2.20975	464.047	8701.98	16.287
2011	272	Serbia	236	Soybeans	69.6736	NA	NA	4.37
2011	223	Turkey	236	Soybeans	1.07894	0	1060.59	1.801
2011	21	Brazil	236	Soybeans	84871.6	84871.6	1.85105e+08	16.749
2011	115	Cambodia	236	Soybeans	3.22855	0	12588.1	9.505
2011	120	Lao	236	Soybeans	0.0130867	NA	NA	8.865
2011	98	Croatia	236	Soybeans	14.0173	0	26843	4.398
2011	157	Nicaragua	236	Soybeans	0.0707607	0	98.9235	4.51
2011	130	Malawi	236	Soybeans	0.0459147	0	0	1.342
2011	159	Nigeria	236	Soybeans	0.0187211	0	106.523	2.328
2011	41	China	236	Soybeans	164.796	41034.3	420066	1.508
2011	238	Ethiopia	236	Soybeans	0.044047	NA	NA	0.815
2011	106	Italy	236	Soybeans	307.232	40247.4	354238	2.273
2011	167	Czech Republic	236	Soybeans	12.6192	0	30765.5	3.932
2011	138	Mexico	236	Soybeans	0.358056	156.829	1120.36	4.236
2011	68	France	236	Soybeans	76.8142	34336	115145	5.064
2011	217	Togo	236	Soybeans	0.0271099	0	0	1.598
2011	198	Slovenia	236	Soybeans	0.112371	0	218	4.224
2011	9	Argentina	236	Soybeans	72547.2	362736	1.51914e+08	13.678
2011	169	Paraguay	236	Soybeans	8765.89	0	2.18446e+07	15.566
2011	59	Egypt	236	Soybeans	0.0196526	30.4811	6.48535	1.681
2011	231	United States	236	Soybeans	14559.3	1.33946e+06	2.27125e+07	22
2011	108	Kazakhstan	236	Soybeans	33.5266	0	48881.8	11.614
2011	216	Thailand	236	Soybeans	61.2145	0	156709	3.613
2011	211	Switzerland	236	Soybeans	0.926312	0	1297.76	1.642
2011	183	Romania	236	Soybeans	15.8635	10216.1	31679.4	4.002
2011	19	Bolivia	236	Soybeans	11.0819	0	33301	11.75
2011	234	Uruguay	236	Soybeans	1720.71	10324.3	5.35485e+06	14.962
2011	10	Australia	236	Soybeans	1.08983	0	2064.14	53.268
2011	251	Zambia	236	Soybeans	0.0983457	0	315.493	5.161
2011	116	North Korea	236	Soybeans	0.0201922	NA	NA	1.141
2011	146	Moldova	236	Soybeans	18.4904	18.4904	55397.2	4.089
2011	79	Germany	236	Soybeans	9.76102	0	19043.7	3.061
2011	33	Canada	236	Soybeans	10790.6	0	1.5463e+07	110.909
2011	27	Bulgaria	236	Soybeans	0.0259704	0.207764	127.307	4.006
2011	97	Hungary	236	Soybeans	57.9324	347.595	110187	4.007
2011	199	Slovak Republic	236	Soybeans	10.8372	1636.42	27916.8	3.987
2011	149	Nepal	236	Soybeans	0.0109523	0	77.1369	0.716
2011	203	Spain	236	Soybeans	0.455463	1195.13	314.725	2.701
2011	121	Lebanon	242	Groundnuts, with shell	0.250026	490.051	51.2553	0.544
2011	10	Australia	242	Groundnuts, with shell	0.0502615	36.7914	85.3943	53.268
2011	215	Tanzania	242	Groundnuts, with shell	0.169909	NA	NA	2.006
2011	50	Cyprus	242	Groundnuts, with shell	0.0185989	0	0	NA
2011	59	Egypt	242	Groundnuts, with shell	0.506696	938.909	131.234	1.681
2011	90	Guinea	242	Groundnuts, with shell	0.0876078	0	369.617	2.492
2011	231	United States	242	Groundnuts, with shell	770.548	194949	968579	22
2011	157	Nicaragua	242	Groundnuts, with shell	60.6158	0	58373	4.51
2011	32	Cameroon	242	Groundnuts, with shell	0.016299	0	106.09	4.848
2011	171	Philippines	242	Groundnuts, with shell	0.0578038	0	0	3.939
2011	81	Ghana	242	Groundnuts, with shell	0.194895	0	844.285	2.981
2011	214	Taiwan	242	Groundnuts, with shell	0.160821	NA	NA	2
2011	129	Madagascar	242	Groundnuts, with shell	0.209216	0	1262.62	5.758
2011	138	Mexico	242	Groundnuts, with shell	0.217594	0	633.852	4.236
2011	19	Bolivia	242	Groundnuts, with shell	2.07263	0	8261.49	11.75
2011	169	Paraguay	242	Groundnuts, with shell	65.5641	0	372863	15.566
2011	143	Morocco	242	Groundnuts, with shell	0.0107652	12.2077	8.70905	0.939
2011	202	South Africa	242	Groundnuts, with shell	189.958	82631.6	419806	2.449
2011	110	Japan	242	Groundnuts, with shell	0.0187284	0	0	3.555
2011	58	Ecuador	242	Groundnuts, with shell	0.0165188	0	53.1408	2.575
2011	130	Malawi	242	Groundnuts, with shell	16.1668	0	93476.4	1.342
2011	233	Burkina Faso	242	Groundnuts, with shell	0.109102	0	562.202	0.973
2011	9	Argentina	242	Groundnuts, with shell	1738.25	78221.5	5.83532e+06	13.678
2011	195	Senegal	242	Groundnuts, with shell	179.867	0	691410	1.544
2011	234	Uruguay	242	Groundnuts, with shell	0.18792	0	1408.08	14.962
2011	203	Spain	242	Groundnuts, with shell	0.334288	0	271.442	2.701
2011	84	Greece	242	Groundnuts, with shell	0.111123	0	69.1186	4.259
2011	107	Cote d'Ivoire	242	Groundnuts, with shell	0.0101817	NA	NA	2.937
2011	41	China	242	Groundnuts, with shell	308.696	26239.2	426927	1.508
2011	21	Brazil	242	Groundnuts, with shell	605.957	1817.87	1.68274e+06	16.749
2011	120	Lao	242	Groundnuts, with shell	0.422889	NA	NA	8.865
2011	217	Togo	242	Groundnuts, with shell	14.5252	0	107763	1.598
2011	216	Thailand	242	Groundnuts, with shell	5.22904	0	15979.9	3.613
2011	194	Saudi Arabia	242	Groundnuts, with shell	0.129149	188.17	14.5938	0.479
2011	159	Nigeria	242	Groundnuts, with shell	0.014792	0	41.0625	2.328
2011	237	Vietnam	242	Groundnuts, with shell	0.105942	0	318.674	3.809
2011	223	Turkey	242	Groundnuts, with shell	0.038363	47.762	23.4782	1.801
2011	226	Uganda	242	Groundnuts, with shell	0.0108815	0	57.8241	1.578
2011	133	Mali	242	Groundnuts, with shell	0.0108249	0.140724	52.3494	3.605
2011	101	Indonesia	242	Groundnuts, with shell	0.737995	0	1915.84	16.287
2011	102	Iran	242	Groundnuts, with shell	0.0147061	NA	NA	0.976
2011	27	Bulgaria	242	Groundnuts, with shell	0.261018	0	1126.55	4.006
2011	158	Niger	242	Groundnuts, with shell	0.0913297	41.829	542.498	1.614
2011	174	Portugal	242	Groundnuts, with shell	0.0139444	0	15.4782	2.74
2011	20	Botswana	242	Groundnuts, with shell	0.488734	0	5703.52	7.297
2011	144	Mozambique	242	Groundnuts, with shell	3.407	0	36461.7	3.451
2011	181	Zimbabwe	242	Groundnuts, with shell	2.52874	123.908	6225.76	1.66
2011	75	Gambia	242	Groundnuts, with shell	11.3347	0	41451	2.186
2011	105	Israel	242	Groundnuts, with shell	0.401462	297.885	33.7228	0.486
2011	100	India	242	Groundnuts, with shell	42.7408	14531.9	122709	0.881
2011	238	Ethiopia	242	Groundnuts, with shell	0.0494315	NA	NA	0.815
2011	38	Sri Lanka	249	Coconuts	30.1602	0	87886.8	2.1
2011	114	Kenya	249	Coconuts	0.0254996	0	50.8463	1.018
2011	58	Ecuador	249	Coconuts	1.06337	0	1434.48	2.575
2011	215	Tanzania	249	Coconuts	6.041	NA	NA	2.006
2011	66	Fiji	249	Coconuts	0.587488	NA	NA	NA
2011	41	China	249	Coconuts	0.0811782	0	64.212	1.508
2011	216	Thailand	249	Coconuts	10.7854	0	26240.8	3.613
2011	83	Kiribati	249	Coconuts	0.224703	0	612.54	NA
2011	171	Philippines	249	Coconuts	2418.71	0	7.89225e+06	3.939
2011	237	Vietnam	249	Coconuts	5.14682	0	9290.01	3.809
2011	129	Madagascar	249	Coconuts	0.0663018	0	266.533	5.758
2011	53	Benin	249	Coconuts	0.0248773	0	142.82	2.331
2011	70	French Polynesia	249	Coconuts	8.23806	0	25200.2	NA
2011	107	Cote d'Ivoire	249	Coconuts	61.6525	NA	NA	2.937
2011	200	Singapore	249	Coconuts	0.018683	0	29.2016	NA
2011	91	Guyana	249	Coconuts	0.786661	0	1928.89	127.073
2011	100	India	249	Coconuts	37.0828	0	91260.8	0.881
2011	56	Dominican Republic	249	Coconuts	12.1606	0	35885.8	1.03
2011	217	Togo	249	Coconuts	0.0168948	0	49.62	1.598
2011	207	Suriname	249	Coconuts	0.0157225	0	23.1907	121.744
2011	244	Samoa	249	Coconuts	0.257199	0	524.429	NA
2011	101	Indonesia	249	Coconuts	1024.64	0	2.54419e+06	16.287
2011	81	Ghana	249	Coconuts	0.0976655	0	169.84	2.981
2011	21	Brazil	249	Coconuts	1.37238	31.5648	1666.07	16.749
2011	48	Costa Rica	249	Coconuts	5.8439	0	14925.3	4.51
2011	214	Taiwan	249	Coconuts	0.0128946	NA	NA	2
2011	49	Cuba	249	Coconuts	0.835624	0	3241.38	2.817
2011	138	Mexico	249	Coconuts	0.211921	0	329.961	4.236
2011	166	Panama	249	Coconuts	0.781299	0	2389.99	4.505
2011	144	Mozambique	249	Coconuts	0.0154357	0	25.7931	3.451
2011	168	Papua New Guinea	249	Coconuts	145.604	0	515583	118.694
2011	131	Malaysia	249	Coconuts	174.392	0	729134	25.815
2011	170	Peru	249	Coconuts	0.690122	0	405.102	7.61
2011	171	Philippines	254	Oil, palm fruit	6.5952	0	6687.53	3.939
2011	89	Guatemala	254	Oil, palm fruit	120.939	0	68330.7	4.459
2011	170	Peru	254	Oil, palm fruit	1.11835	0	384.713	7.61
2011	90	Guinea	254	Oil, palm fruit	0.116225	0.697348	425.731	2.492
2011	131	Malaysia	254	Oil, palm fruit	46523.8	0	3.83356e+07	25.815
2011	216	Thailand	254	Oil, palm fruit	1823.17	0	1.2434e+06	3.613
2011	236	Venezuela	254	Oil, palm fruit	0.360794	NA	NA	17.1
2011	32	Cameroon	254	Oil, palm fruit	0.619693	0	317.283	4.848
2011	195	Senegal	254	Oil, palm fruit	0.153159	0	100.626	1.544
2011	168	Papua New Guinea	254	Oil, palm fruit	3296.23	0	2.6238e+06	118.694
2011	48	Costa Rica	254	Oil, palm fruit	135.986	0	102126	4.51
2011	197	Sierra Leone	254	Oil, palm fruit	0.0610458	0	77.7724	2.658
2011	21	Brazil	254	Oil, palm fruit	170.756	0	192101	16.749
2011	215	Tanzania	254	Oil, palm fruit	0.0802811	NA	NA	2.006
2011	44	Colombia	254	Oil, palm fruit	1098.62	0	699820	9.648
2011	166	Panama	254	Oil, palm fruit	26.8142	0	29066.6	4.505
2011	159	Nigeria	254	Oil, palm fruit	20.7463	62.2389	77757.1	2.328
2011	123	Liberia	254	Oil, palm fruit	9.77698	0	11575.9	5.57
2011	157	Nicaragua	254	Oil, palm fruit	2.33137	0	927.887	4.51
2011	58	Ecuador	254	Oil, palm fruit	400.738	0	286928	2.575
2011	101	Indonesia	254	Oil, palm fruit	35467.6	0	3.20627e+07	16.287
2011	56	Dominican Republic	254	Oil, palm fruit	0.517278	0	379.682	1.03
2011	41	China	254	Oil, palm fruit	0.0297841	0	14.1772	1.508
2011	95	Honduras	254	Oil, palm fruit	508.953	0	365428	4.51
2011	107	Cote d'Ivoire	254	Oil, palm fruit	194.816	NA	NA	2.937
2011	169	Paraguay	254	Oil, palm fruit	0.701387	0	965.108	15.566
2011	75	Gambia	254	Oil, palm fruit	0.0341709	0	23.988	2.186
2011	74	Gabon	254	Oil, palm fruit	0.597963	0	762.403	43.224
2011	53	Benin	254	Oil, palm fruit	0.0859329	0	64.7934	2.331
2011	217	Togo	254	Oil, palm fruit	0.169814	0	182.72	1.598
2011	81	Ghana	254	Oil, palm fruit	21.2013	0	26734.8	2.981
2011	103	Iraq	260	Olives	0.0187526	51.082	12.3579	0.675
2011	59	Egypt	260	Olives	12.1993	19323.7	4123.36	1.681
2011	103	Iraq	260	Olives	0.0187526	51.082	12.3579	0.675
2011	103	Iraq	260	Olives	0.0187526	51.082	12.3579	0.675
2011	3	Albania	260	Olives	1.40421	242.929	6908.73	4.4
2011	299	NA	260	Olives	0.794379	167.614	2708.04	NA
2011	231	United States	260	Olives	0.0934362	50.9227	42.42	22
2011	103	Iraq	260	Olives	0.0187526	51.082	12.3579	0.675
2011	170	Peru	260	Olives	0.737473	345.875	942.49	7.61
2011	102	Iran	260	Olives	0.0101291	NA	NA	0.976
2011	121	Lebanon	260	Olives	1.1227	1342.75	2069.14	0.544
2011	154	NA	260	Olives	0.149772	NA	NA	NA
2011	68	France	260	Olives	5.6655	1631.66	26367.2	5.064
2011	10	Australia	260	Olives	13.8483	6896.44	19913.8	53.268
2011	222	Tunisia	260	Olives	130.516	42417.6	1.14723e+06	0.869
2011	106	Italy	260	Olives	2577.38	324750	4.56711e+06	2.273
2011	174	Portugal	260	Olives	365.196	47110.3	2.68821e+06	2.74
2011	112	Jordan	260	Olives	0.115075	126.007	200.001	0.108
2011	84	Greece	260	Olives	1933.25	421447	2.56348e+06	4.259
2011	50	Cyprus	260	Olives	7.21039	8335.21	13721.4	NA
2011	203	Spain	260	Olives	6388.1	3.43041e+06	1.41369e+07	2.701
2011	223	Turkey	260	Olives	35.0729	9469.68	76178.3	1.801
2011	105	Israel	260	Olives	0.653174	557.81	1224.7	0.486
2011	143	Morocco	260	Olives	102.877	142280	366244	0.939
2011	212	Syria	260	Olives	1.8188	2198.93	4670.68	0.976
2011	198	Slovenia	260	Olives	0.0178089	0	37.3631	4.224
2011	98	Croatia	260	Olives	0.0760269	0.0760269	263.889	4.398
2011	9	Argentina	260	Olives	2.94279	2928.07	4855.6	13.678
2011	40	Chile	260	Olives	4.39973	3251.4	7849.12	21.914
2011	216	Thailand	265	Castor oil seed	12.6459	15642.9	212615	3.613
2011	41	China	265	Castor oil seed	0.878311	273.155	6336.14	1.508
2011	165	Pakistan	265	Castor oil seed	0.0946034	657.399	577.554	0.594
2011	21	Brazil	265	Castor oil seed	68.1673	105046	688626	16.749
2011	129	Madagascar	265	Castor oil seed	0.030913	0	823.305	5.758
2011	100	India	265	Castor oil seed	4658.81	6.62483e+06	3.55188e+07	0.881
2011	169	Paraguay	265	Castor oil seed	0.946322	0	8338.99	15.566
2011	101	Indonesia	265	Castor oil seed	38.4148	0	2.19537e+06	16.287
2011	211	Switzerland	267	Sunflower seed	0.986226	0	1172.62	1.642
2011	11	Austria	267	Sunflower seed	154.96	0	237089	2.873
2011	106	Italy	267	Sunflower seed	72.7174	4944.78	128782	2.273
2011	10	Australia	267	Sunflower seed	0.483763	0	1969.4	53.268
2011	234	Uruguay	267	Sunflower seed	0.918198	21.1186	3411.11	14.962
2011	59	Egypt	267	Sunflower seed	0.150135	135.872	68.6116	1.681
2011	19	Bolivia	267	Sunflower seed	3.04691	0	15594.1	11.75
2011	203	Spain	267	Sunflower seed	154.246	139284	384227	2.701
2011	169	Paraguay	267	Sunflower seed	8.66874	0	36547.4	15.566
2011	154	NA	267	Sunflower seed	0.187584	NA	NA	NA
2011	185	Russia	267	Sunflower seed	555.673	4445.39	1.93763e+06	12.681
2011	100	India	267	Sunflower seed	0.794193	482.075	6741.11	0.881
2011	144	Mozambique	267	Sunflower seed	0.0826433	0	734.533	3.451
2011	231	United States	267	Sunflower seed	1002.67	114305	3.15039e+06	22
2011	98	Croatia	267	Sunflower seed	7.95097	0	16553.9	4.398
2011	183	Romania	267	Sunflower seed	942.028	109275	2.83268e+06	4.002
2011	215	Tanzania	267	Sunflower seed	2.67438	NA	NA	2.006
2011	216	Thailand	267	Sunflower seed	4.00012	0	25372.7	3.613
2011	173	Poland	267	Sunflower seed	8.87044	0	20082.7	3.103
2011	27	Bulgaria	267	Sunflower seed	11860.6	118606	3.64595e+07	4.006
2011	199	Slovak Republic	267	Sunflower seed	138.097	7319.15	287656	3.987
2011	84	Greece	267	Sunflower seed	26.0841	16719.9	57671.9	4.259
2011	138	Mexico	267	Sunflower seed	0.18793	0	664.145	4.236
2011	108	Kazakhstan	267	Sunflower seed	0.10032	0	456.756	11.614
2011	146	Moldova	267	Sunflower seed	387.136	4258.49	1.10256e+06	4.089
2011	40	Chile	267	Sunflower seed	0.191063	0	388.43	21.914
2011	226	Uganda	267	Sunflower seed	0.170905	0	750.786	1.578
2011	202	South Africa	267	Sunflower seed	0.25822	18.3336	745.224	2.449
2011	79	Germany	267	Sunflower seed	73.0634	0	116901	3.061
2011	3	Albania	267	Sunflower seed	0.0174024	5.81239	41.5742	4.4
2011	21	Brazil	267	Sunflower seed	7.26158	0	30338.9	16.749
2011	223	Turkey	267	Sunflower seed	12.1955	3170.84	19756.8	1.801
2011	230	Ukraine	267	Sunflower seed	7258.26	174198	2.26167e+07	4.3
2011	272	Serbia	267	Sunflower seed	84.5308	NA	NA	4.37
2011	57	Belarus	267	Sunflower seed	0.061717	0	124.545	5.092
2011	68	France	267	Sunflower seed	1599.16	17590.8	1.97017e+06	5.064
2011	33	Canada	267	Sunflower seed	9.60748	12239.9	24691.2	110.909
2011	143	Morocco	267	Sunflower seed	0.0757122	215.25	225.471	0.939
2011	20	Botswana	267	Sunflower seed	0.0167894	0	52.2991	7.297
2011	80	Bosnia and Herzegovina	267	Sunflower seed	0.0733086	0	524.229	4.4
2011	167	Czech Republic	267	Sunflower seed	33.5785	0	58493.7	3.932
2011	198	Slovenia	267	Sunflower seed	0.259693	0	711.299	4.224
2011	174	Portugal	267	Sunflower seed	2.13175	7363.06	12078.5	2.74
2011	52	Azerbaijan	267	Sunflower seed	0.126876	0	241.825	1.916
2011	102	Iran	267	Sunflower seed	0.0944426	NA	NA	0.976
2011	97	Hungary	267	Sunflower seed	1109.54	2219.08	2.0937e+06	4.007
2011	105	Israel	267	Sunflower seed	0.367405	1239.99	210.891	0.486
2011	114	Kenya	267	Sunflower seed	0.0713678	0	279.191	1.018
2011	41	China	267	Sunflower seed	85.6191	29196.1	192985	1.508
2011	9	Argentina	267	Sunflower seed	1356.58	14922.4	3.62479e+06	13.678
2011	231	United States	27	Rice, paddy	178.032	150793	75129.6	22
2011	27	Bulgaria	27	Rice, paddy	7.08048	5189.99	4474.86	4.006
2011	59	Egypt	27	Rice, paddy	185.293	185849	10932.3	1.681
2011	158	Niger	27	Rice, paddy	0.198698	381.102	255.128	1.614
2011	115	Cambodia	27	Rice, paddy	362.647	68177.7	879057	9.505
2011	16	Bangladesh	27	Rice, paddy	1.30574	245.48	1760.14	2.294
2011	68	France	27	Rice, paddy	119.399	94444.7	60535.4	5.064
2011	91	Guyana	27	Rice, paddy	177.785	72536.3	237343	127.073
2011	171	Philippines	27	Rice, paddy	0.0457163	9.46328	90.7469	3.939
2011	110	Japan	27	Rice, paddy	3.95284	675.935	2276.83	3.555
2011	97	Hungary	27	Rice, paddy	2.29456	1775.99	1863.19	4.007
2011	166	Panama	27	Rice, paddy	0.0197985	0.25738	35.2809	4.505
2011	38	Sri Lanka	27	Rice, paddy	2.89994	1824.06	3674.22	2.1
2011	230	Ukraine	27	Rice, paddy	0.0410736	32.407	26.78	4.3
2011	106	Italy	27	Rice, paddy	11498.2	5.0822e+06	6.68045e+06	2.273
2011	10	Australia	27	Rice, paddy	2.88506	3317.81	729.919	53.268
2011	102	Iran	27	Rice, paddy	2.48157	NA	NA	0.976
2011	107	Cote d'Ivoire	27	Rice, paddy	0.0195535	NA	NA	2.937
2011	101	Indonesia	27	Rice, paddy	3.80655	692.792	5667.95	16.287
2011	183	Romania	27	Rice, paddy	11.5336	9838.17	10437.9	4.002
2011	100	India	27	Rice, paddy	665.956	301012	928343	0.881
2011	58	Ecuador	27	Rice, paddy	0.156363	58.3235	214.687	2.575
2011	117	South Korea	27	Rice, paddy	0.834227	NA	NA	1.14
2011	169	Paraguay	27	Rice, paddy	10.129	5692.49	15193.5	15.566
2011	234	Uruguay	27	Rice, paddy	435.688	269255	327202	14.962
2011	143	Morocco	27	Rice, paddy	9.55902	12216.4	2800.79	0.939
2011	237	Vietnam	27	Rice, paddy	168.319	27099.4	172695	3.809
2011	195	Senegal	27	Rice, paddy	0.420386	388.437	526.744	1.544
2011	21	Brazil	27	Rice, paddy	452.543	161105	879292	16.749
2011	214	Taiwan	27	Rice, paddy	0.2251	NA	NA	2
2011	130	Malawi	27	Rice, paddy	0.0109897	2.0221	38.5079	1.342
2011	28	Myanmar	27	Rice, paddy	44.6282	3927.28	87694.5	9.429
2011	56	Dominican Republic	27	Rice, paddy	13.8695	11470	10679.5	1.03
2011	149	Nepal	27	Rice, paddy	0.128021	25.0922	228.774	0.716
2011	129	Madagascar	27	Rice, paddy	0.121561	95.3038	309.494	5.758
2011	84	Greece	27	Rice, paddy	229.123	135641	57051.7	4.259
2011	9	Argentina	27	Rice, paddy	375.203	168091	414974	13.678
2011	176	Timor-Leste	27	Rice, paddy	0.0165157	3.46829	42.9242	1.562
2011	154	NA	27	Rice, paddy	0.592995	NA	NA	NA
2011	174	Portugal	27	Rice, paddy	43.9108	47687.1	14666.2	2.74
2011	165	Pakistan	27	Rice, paddy	643.571	1.41071e+06	429905	0.594
2011	185	Russia	27	Rice, paddy	19.4648	33323.7	15591.3	12.681
2011	108	Kazakhstan	27	Rice, paddy	2.94642	9661.32	1075.44	11.614
2011	216	Thailand	27	Rice, paddy	5008.33	1.88313e+06	9.1402e+06	3.613
2011	41	China	27	Rice, paddy	16.1029	3961.32	8840.51	1.508
2011	120	Lao	27	Rice, paddy	4.76007	NA	NA	8.865
2011	131	Malaysia	27	Rice, paddy	0.233183	131.748	543.317	25.815
2011	170	Peru	27	Rice, paddy	0.0301066	12.133	15.2942	7.61
2011	223	Turkey	27	Rice, paddy	9.68239	8568.92	2924.08	1.801
2011	207	Suriname	27	Rice, paddy	42.2322	15245.8	39318.2	121.744
2011	203	Spain	27	Rice, paddy	5828.33	7.02314e+06	1.99329e+06	2.701
2011	229	United Kingdom	270	Rapeseed	15206	0	1.59055e+07	5.868
2011	231	United States	270	Rapeseed	184.042	3864.88	516790	22
2011	162	Norway	270	Rapeseed	0.716573	0	1291.27	55.393
2011	100	India	270	Rapeseed	117.109	176600	193698	0.881
2011	156	New Zealand	270	Rapeseed	0.748209	0	1640.82	58.852
2011	173	Poland	270	Rapeseed	9025.52	0	1.32404e+07	3.103
2011	198	Slovenia	270	Rapeseed	15.5136	0	25938.7	4.224
2011	203	Spain	270	Rapeseed	44.0369	3126.62	88161.9	2.701
2011	104	Ireland	270	Rapeseed	202.156	0	227223	19.74
2011	40	Chile	270	Rapeseed	5.35847	0	5347.75	21.914
2011	234	Uruguay	270	Rapeseed	2.0901	0	3465.39	14.962
2011	41	China	270	Rapeseed	16.7817	0	23276.3	1.508
2011	80	Bosnia and Herzegovina	270	Rapeseed	1.55903	0	3303.59	4.4
2011	9	Argentina	270	Rapeseed	318.182	0	1.11364e+06	13.678
2011	106	Italy	270	Rapeseed	33.9123	0	112758	2.273
2011	255	Belgium	270	Rapeseed	382.643	0	379582	2.037
2011	68	France	270	Rapeseed	26865.2	134326	3.14323e+07	5.064
2011	79	Germany	270	Rapeseed	63330.1	0	6.38367e+07	3.061
2011	185	Russia	270	Rapeseed	13173.8	0	4.50412e+07	12.681
2011	150	Netherlands	270	Rapeseed	55.1563	0	48316.9	3.277
2011	108	Kazakhstan	270	Rapeseed	4014.45	0	1.86873e+07	11.614
2011	146	Moldova	270	Rapeseed	399.995	0	1.33918e+06	4.089
2011	210	Sweden	270	Rapeseed	1291	0	1.50531e+06	20.223
2011	97	Hungary	270	Rapeseed	3782.37	170207	8.32121e+06	4.007
2011	167	Czech Republic	270	Rapeseed	4857.24	0	7.58701e+06	3.932
2011	223	Turkey	270	Rapeseed	1.0354	0	1319.1	1.801
2011	84	Greece	270	Rapeseed	0.275115	0	0	4.259
2011	57	Belarus	270	Rapeseed	1206.45	0	5.6522e+06	5.092
2011	98	Croatia	270	Rapeseed	22.2075	0	48656.7	4.398
2011	63	Estonia	270	Rapeseed	26168.6	0	6.07373e+07	8.345
2011	230	Ukraine	270	Rapeseed	7071.87	0	2.71984e+07	4.3
2011	272	Serbia	270	Rapeseed	45.7727	NA	NA	4.37
2011	21	Brazil	270	Rapeseed	10.1793	0	28787	16.749
2011	10	Australia	270	Rapeseed	12970.8	0	2.73036e+07	53.268
2011	199	Slovak Republic	270	Rapeseed	819.629	4098.14	1.51385e+06	3.987
2011	126	Lithuania	270	Rapeseed	17178	0	3.66063e+07	8.15
2011	256	Luxembourg	270	Rapeseed	113.175	0	116910	1.954
2011	102	Iran	270	Rapeseed	29.3633	NA	NA	0.976
2011	33	Canada	270	Rapeseed	5017.71	0	1.36331e+07	110.909
2011	119	Latvia	270	Rapeseed	10443.9	0	2.04492e+07	8.345
2011	27	Bulgaria	270	Rapeseed	3177.83	0	9.38732e+06	4.006
2011	211	Switzerland	270	Rapeseed	23.5973	0	26617.7	1.642
2011	202	South Africa	270	Rapeseed	0.202047	0	763.133	2.449
2011	169	Paraguay	270	Rapeseed	156.125	0	541441	15.566
2011	154	NA	270	Rapeseed	0.0226073	NA	NA	NA
2011	11	Austria	270	Rapeseed	486.419	0	807942	2.873
2011	141	Mongolia	270	Rapeseed	0.445518	0	0	8.853
2011	16	Bangladesh	270	Rapeseed	0.161645	63.3648	625.565	2.294
2011	238	Ethiopia	270	Rapeseed	0.297856	NA	NA	0.815
2011	183	Romania	270	Rapeseed	4006.85	0	1.23972e+07	4.002
2011	54	Denmark	270	Rapeseed	5594.83	0	6.84807e+06	7.856
2011	231	United States	280	Safflower seed	0.0823742	68.7825	110.876	22
2011	138	Mexico	280	Safflower seed	0.462057	340.998	1520.63	4.236
2011	215	Tanzania	280	Safflower seed	0.0728206	NA	NA	2.006
2011	203	Spain	280	Safflower seed	0.0129528	23.4056	30.7887	2.701
2011	9	Argentina	280	Safflower seed	1.46178	365.444	10168.1	13.678
2011	201	Somalia	289	Sesame seed	0.0587809	33.9166	423.81	1.984
2011	107	Cote d'Ivoire	289	Sesame seed	0.0105603	NA	NA	2.937
2011	59	Egypt	289	Sesame seed	1.27293	2491.12	1591.16	1.681
2011	44	Colombia	289	Sesame seed	0.265741	8.23797	1481.24	9.648
2011	95	Honduras	289	Sesame seed	0.032274	0.258192	156.4	4.51
2011	169	Paraguay	289	Sesame seed	15.7877	15.7877	103488	15.566
2011	144	Mozambique	289	Sesame seed	0.422997	13.9589	3347.6	3.451
2011	217	Togo	289	Sesame seed	0.574282	0.574282	8750.34	1.598
2011	114	Kenya	289	Sesame seed	0.0804939	16.4208	581.327	1.018
2011	194	Saudi Arabia	289	Sesame seed	1.78943	6706.8	3131.51	0.479
2011	233	Burkina Faso	289	Sesame seed	26.2605	210.084	243802	0.973
2011	115	Cambodia	289	Sesame seed	0.368484	0	2947.87	9.505
2011	102	Iran	289	Sesame seed	0.817287	NA	NA	0.976
2011	28	Myanmar	289	Sesame seed	0.428071	15.4106	5848.74	9.429
2011	117	South Korea	289	Sesame seed	0.0291782	NA	NA	1.14
2011	41	China	289	Sesame seed	4.36683	227.075	18628.9	1.508
2011	121	Lebanon	289	Sesame seed	0.0915277	5.40014	100.589	0.544
2011	158	Niger	289	Sesame seed	0.194619	227.51	1872.63	1.614
2011	133	Mali	289	Sesame seed	5.27888	395.916	60606.8	3.605
2011	84	Greece	289	Sesame seed	0.529392	1333.54	1721.05	4.259
2011	238	Ethiopia	289	Sesame seed	49.2828	NA	NA	0.815
2011	166	Panama	289	Sesame seed	0.0121254	0	88.1274	4.505
2011	249	Yemen	289	Sesame seed	0.324473	548.683	1120.08	0.408
2011	106	Italy	289	Sesame seed	0.429339	18.4616	165.725	2.273
2011	165	Pakistan	289	Sesame seed	8.82363	26956.2	29118	0.594
2011	212	Syria	289	Sesame seed	0.0323754	295.717	112.893	0.976
2011	138	Mexico	289	Sesame seed	9.56405	4667.26	71625.2	4.236
2011	89	Guatemala	289	Sesame seed	7.9897	15.9794	53195.4	4.459
2011	159	Nigeria	289	Sesame seed	23.5183	94.0733	193673	2.328
2011	60	El Salvador	289	Sesame seed	0.184051	205.401	791.052	4.51
2011	100	India	289	Sesame seed	369.91	74352	5.20427e+06	0.881
2011	154	NA	289	Sesame seed	0.0159179	NA	NA	NA
2011	38	Sri Lanka	289	Sesame seed	0.0890863	168.551	532.024	2.1
2011	214	Taiwan	289	Sesame seed	0.0213847	NA	NA	2
2011	195	Senegal	289	Sesame seed	0.181248	0	1554.38	1.544
2011	16	Bangladesh	289	Sesame seed	0.0482484	0	226.333	2.294
2011	237	Vietnam	289	Sesame seed	0.0251685	0.0503369	199.536	3.809
2011	223	Turkey	289	Sesame seed	0.48217	895.872	2640.36	1.801
2011	120	Lao	289	Sesame seed	0.232265	NA	NA	8.865
2011	215	Tanzania	289	Sesame seed	0.82145	NA	NA	2.006
2011	216	Thailand	289	Sesame seed	9.67901	706.568	65197.8	3.613
2011	226	Uganda	289	Sesame seed	2.2523	0	13795.4	1.578
2011	2	Afghanistan	289	Sesame seed	0.244256	1350.25	605.999	0.853
2011	90	Guinea	289	Sesame seed	0.100589	0	2231.86	2.492
2011	236	Venezuela	289	Sesame seed	19.975	NA	NA	17.1
2011	157	Nicaragua	289	Sesame seed	1.55156	0	12595.6	4.51
2011	79	Germany	292	Mustard seed	90.6514	0	100442	3.061
2011	183	Romania	292	Mustard seed	21.8737	0	60021.6	4.002
2011	68	France	292	Mustard seed	78.9079	0	82616.6	5.064
2011	38	Sri Lanka	292	Mustard seed	0.0645742	0	201.472	2.1
2011	27	Bulgaria	292	Mustard seed	0.0387	0	102.439	4.006
2011	33	Canada	292	Mustard seed	723.429	0	1.52065e+06	110.909
2011	231	United States	292	Mustard seed	13.679	0	29492	22
2011	41	China	292	Mustard seed	2.18904	80.9944	6586.82	1.508
2011	199	Slovak Republic	292	Mustard seed	4.6396	0	10527.2	3.987
2011	185	Russia	292	Mustard seed	30.0547	0	108227	12.681
2011	272	Serbia	292	Mustard seed	3.87141	NA	NA	4.37
2011	108	Kazakhstan	292	Mustard seed	0.130008	0	976.227	11.614
2011	97	Hungary	292	Mustard seed	28.7129	0	35977.3	4.007
2011	126	Lithuania	292	Mustard seed	11.5645	0	26147.3	8.15
2011	149	Nepal	292	Mustard seed	5.75975	0	15488	0.716
2011	54	Denmark	292	Mustard seed	0.300825	0	435.896	7.856
2011	230	Ukraine	292	Mustard seed	1156.99	0	3.12966e+06	4.3
2011	138	Mexico	292	Mustard seed	0.0138991	0	1.02853	4.236
2011	167	Czech Republic	292	Mustard seed	257.126	0	400603	3.932
2011	97	Hungary	296	Poppy seed	0.512779	0	656.357	4.007
2011	203	Spain	296	Poppy seed	2.32422	0	643.808	2.701
2011	150	Netherlands	296	Poppy seed	1.24919	0	433.469	3.277
2011	79	Germany	296	Poppy seed	0.163402	0	133.009	3.061
2011	223	Turkey	296	Poppy seed	32.504	0	89808.4	1.801
2011	11	Austria	296	Poppy seed	0.0690662	0	48.2082	2.873
2011	68	France	296	Poppy seed	4.29667	0	8305.46	5.064
2011	199	Slovak Republic	296	Poppy seed	0.0141502	0	26.5742	3.987
2011	27	Bulgaria	296	Poppy seed	0.0469152	0	0	4.006
2011	154	NA	296	Poppy seed	0.026274	NA	NA	NA
2011	167	Czech Republic	296	Poppy seed	4.23394	0	4801.29	3.932
2011	108	Kazakhstan	328	Seed cotton	0.34527	626.319	370.474	11.614
2011	223	Turkey	328	Seed cotton	1.94932	4541.92	927.877	1.801
2011	181	Zimbabwe	328	Seed cotton	0.198072	4.55564	506.073	1.66
2011	203	Spain	328	Seed cotton	2.14774	4630.53	856.95	2.701
2011	84	Greece	328	Seed cotton	5.04834	5987.34	2695.82	4.259
2011	235	Uzbekistan	328	Seed cotton	0.348108	1163.03	122.186	1.147
2011	213	Turkmenistan	328	Seed cotton	0.200883	958.616	200.683	2.688
2011	113	Kyrgyz Republic	328	Seed cotton	0.0134854	16.2769	10.6939	1.352
2011	212	Syria	328	Seed cotton	0.056946	117.536	3.81538	0.976
2011	133	Mali	328	Seed cotton	0.0832222	0	394.473	3.605
2011	159	Nigeria	328	Seed cotton	0.0550328	0.935558	129.162	2.328
2011	215	Tanzania	328	Seed cotton	0.0941877	NA	NA	2.006
2011	39	Chad	328	Seed cotton	0.210899	0	1739.71	4.791
2011	41	China	328	Seed cotton	1.79342	442.974	2582.52	1.508
2011	21	Brazil	328	Seed cotton	13.6959	246.526	30240.5	16.749
2011	107	Cote d'Ivoire	328	Seed cotton	0.306756	NA	NA	2.937
2011	249	Yemen	328	Seed cotton	0.0199606	120.003	37.2864	0.408
2011	32	Cameroon	328	Seed cotton	0.0933676	0	390.463	4.848
2011	105	Israel	328	Seed cotton	0.115042	121.485	33.3623	0.486
2011	102	Iran	328	Seed cotton	0.0256684	NA	NA	0.976
2011	59	Egypt	328	Seed cotton	0.327099	1244.61	50.3732	1.681
2011	144	Mozambique	328	Seed cotton	0.0532952	0	528.048	3.451
2011	231	United States	328	Seed cotton	27.2881	24641.2	57687.1	22
2011	9	Argentina	328	Seed cotton	1.51615	145.55	8708.74	13.678
2011	251	Zambia	328	Seed cotton	0.162209	0.486627	320.85	5.161
2011	53	Benin	328	Seed cotton	0.110038	0	523.012	2.331
2011	226	Uganda	328	Seed cotton	0.134211	0	1800.84	1.578
2011	95	Honduras	328	Seed cotton	0.0119919	0.527646	37.187	4.51
2011	195	Senegal	328	Seed cotton	0.0620769	0	399.279	1.544
2011	138	Mexico	328	Seed cotton	0.0795103	166.972	63.6083	4.236
2011	169	Paraguay	328	Seed cotton	0.0373046	0	300.153	15.566
2011	158	Niger	328	Seed cotton	0.0259902	49.8232	50.0831	1.614
2011	165	Pakistan	328	Seed cotton	1.43868	3101.78	1412.78	0.594
2011	208	Tajikistan	328	Seed cotton	0.21263	819.688	116.309	1.08
2011	217	Togo	328	Seed cotton	0.118773	0	567.5	1.598
2011	233	Burkina Faso	328	Seed cotton	0.609957	0	3022.34	0.973
2011	10	Australia	328	Seed cotton	1.44797	2645.43	1211.95	53.268
2011	130	Malawi	328	Seed cotton	0.0245439	0	152.368	1.342
2011	37	Central African Republic	328	Seed cotton	0.0443623	0	315.061	5.028
2011	100	India	328	Seed cotton	1.15725	2159.43	7510.54	0.881
2011	81	Ghana	328	Seed cotton	0.0195143	0	113.573	2.981
2011	54	Denmark	333	Linseed	0.0577013	0.173104	325.666	7.856
2011	170	Peru	333	Linseed	0.0226061	15.9825	96.1213	7.61
2011	150	Netherlands	333	Linseed	1.69606	33.9213	5010.17	3.277
2011	230	Ukraine	333	Linseed	12.5525	1594.17	104951	4.3
2011	79	Germany	333	Linseed	5.38342	21.5337	17431.5	3.061
2011	106	Italy	333	Linseed	0.204408	122.44	1044.53	2.273
2011	119	Latvia	333	Linseed	0.365388	0.365388	3653.88	8.345
2011	108	Kazakhstan	333	Linseed	128.391	454760	496872	11.614
2011	167	Czech Republic	333	Linseed	0.283115	8.21034	1334.61	3.932
2011	21	Brazil	333	Linseed	0.0684251	0.0684251	259.331	16.749
2011	199	Slovak Republic	333	Linseed	0.121321	51.8039	435.056	3.987
2011	59	Egypt	333	Linseed	0.0197796	25.4762	16.9116	1.681
2011	255	Belgium	333	Linseed	11.6766	338.623	49637.4	2.037
2011	173	Poland	333	Linseed	0.093854	0.093854	590.623	3.103
2011	68	France	333	Linseed	8.84795	2849.04	45505	5.064
2011	203	Spain	333	Linseed	0.280925	844.461	1178.76	2.701
2011	185	Russia	333	Linseed	283.851	31791.3	1.61965e+06	12.681
2011	234	Uruguay	333	Linseed	0.463682	39.8766	1979.46	14.962
2011	100	India	333	Linseed	1.01592	147.308	13439.6	0.881
2011	63	Estonia	333	Linseed	0.557618	0.557618	2815.41	8.345
2011	156	New Zealand	333	Linseed	0.0353698	7.21545	72.5789	58.852
2011	126	Lithuania	333	Linseed	2.85006	19.9504	26126.5	8.15
2011	41	China	333	Linseed	2.76406	185.192	13983.4	1.508
2011	27	Bulgaria	333	Linseed	0.0791116	24.841	531.63	4.006
2011	57	Belarus	333	Linseed	0.116655	0.583277	1846.89	5.092
2011	229	United Kingdom	333	Linseed	45.5931	775.083	95244.1	5.868
2011	231	United States	333	Linseed	19.3824	18549	46692.2	22
2011	11	Austria	333	Linseed	0.24272	10.9224	750.975	2.873
2011	183	Romania	333	Linseed	0.526789	54.786	2307.33	4.002
2011	210	Sweden	333	Linseed	233.017	1165.08	644525	20.223
2011	33	Canada	333	Linseed	332.7	9981	902615	110.909
2011	10	Australia	333	Linseed	0.0341925	14.566	96.6963	53.268
2011	97	Hungary	333	Linseed	0.0507391	4.76948	158.306	4.007
2011	9	Argentina	333	Linseed	31.4076	19441.3	200632	13.678
2011	41	China	339	Oilseeds nes	1273.21	0	0	1.508
2011	114	Kenya	339	Oilseeds nes	15.4608	6524.46	99644.9	1.018
2011	107	Cote d'Ivoire	339	Oilseeds nes	49.7729	NA	NA	2.937
2011	165	Pakistan	339	Oilseeds nes	213.252	0	0	0.594
2011	97	Hungary	339	Oilseeds nes	90.9317	10457.1	193594	4.007
2011	143	Morocco	339	Oilseeds nes	3.3434	12915.6	3447.05	0.939
2011	33	Canada	339	Oilseeds nes	71.9898	14110	687863	110.909
2011	235	Uzbekistan	339	Oilseeds nes	0.0361912	101.046	34.5626	1.147
2011	21	Brazil	339	Oilseeds nes	428.864	0	0	16.749
2011	215	Tanzania	339	Oilseeds nes	40.26	NA	NA	2.006
2011	27	Bulgaria	339	Oilseeds nes	48.9703	6464.08	94463.6	4.006
2011	144	Mozambique	339	Oilseeds nes	0.0125694	1.70943	165.815	3.451
2011	131	Malaysia	339	Oilseeds nes	510.381	190372	4.05191e+06	25.815
2011	226	Uganda	339	Oilseeds nes	2.22294	0	0	1.578
2011	106	Italy	339	Oilseeds nes	229.564	0	0	2.273
2011	214	Taiwan	339	Oilseeds nes	9.10258	NA	NA	2
2011	171	Philippines	339	Oilseeds nes	0.593731	61.1543	5458.17	3.939
2011	37	Central African Republic	339	Oilseeds nes	0.110947	0	0	5.028
2011	53	Benin	339	Oilseeds nes	4.23562	16.9425	15989.5	2.331
2011	52	Azerbaijan	339	Oilseeds nes	0.63646	318.867	463.343	1.916
2011	81	Ghana	339	Oilseeds nes	47.0578	0	0	2.981
2011	68	France	339	Oilseeds nes	218.913	0	0	5.064
2011	117	South Korea	339	Oilseeds nes	24.3542	NA	NA	1.14
2011	16	Bangladesh	339	Oilseeds nes	67.5148	67.5148	241095	2.294
2011	174	Portugal	339	Oilseeds nes	157.691	0	0	2.74
2011	211	Switzerland	339	Oilseeds nes	0.949103	0	0	1.642
2011	115	Cambodia	339	Oilseeds nes	0.665952	0	912.354	9.505
2011	105	Israel	339	Oilseeds nes	14.0879	79357.1	13073.6	0.486
2011	108	Kazakhstan	339	Oilseeds nes	17.1859	36159.1	18440.5	11.614
2011	149	Nepal	339	Oilseeds nes	67.3757	1414.89	511718	0.716
2011	181	Zimbabwe	339	Oilseeds nes	0.505456	305.801	4170.01	1.66
2011	119	Latvia	339	Oilseeds nes	49.4219	49.4219	103045	8.345
2011	185	Russia	339	Oilseeds nes	38.7781	5312.6	165854	12.681
2011	167	Czech Republic	339	Oilseeds nes	18.8211	922.233	71407.2	3.932
2011	11	Austria	339	Oilseeds nes	94.6605	5206.33	199923	2.873
2011	238	Ethiopia	339	Oilseeds nes	1116.3	NA	NA	0.815
2011	170	Peru	339	Oilseeds nes	62.3323	0	0	7.61
2011	173	Poland	339	Oilseeds nes	117.503	352.509	477179	3.103
2011	48	Costa Rica	339	Oilseeds nes	8.44728	0	0	4.51
2011	159	Nigeria	339	Oilseeds nes	0.99962	0	0	2.328
2011	32	Cameroon	339	Oilseeds nes	0.146689	0	0	4.848
2011	199	Slovak Republic	339	Oilseeds nes	19.7981	10611.8	49633.9	3.987
2011	158	Niger	339	Oilseeds nes	17.2403	0	0	1.614
2011	98	Croatia	339	Oilseeds nes	6.8724	0	0	4.398
2011	202	South Africa	339	Oilseeds nes	61.6973	123826	168310	2.449
2011	129	Madagascar	339	Oilseeds nes	0.0327908	0	0	5.758
2011	230	Ukraine	339	Oilseeds nes	45.2227	5019.72	183062	4.3
2011	102	Iran	339	Oilseeds nes	0.102427	NA	NA	0.976
2011	126	Lithuania	339	Oilseeds nes	40.3269	0	0	8.15
2011	100	India	339	Oilseeds nes	2068.01	1.07123e+06	2.89728e+07	0.881
2011	41	China	358	Cabbages and other brassicas	0.415619	1.66248	98.5017	1.508
2011	272	Serbia	358	Cabbages and other brassicas	22.7543	NA	NA	4.37
2011	216	Thailand	358	Cabbages and other brassicas	0.0127682	0.344742	5.784	3.613
2011	230	Ukraine	358	Cabbages and other brassicas	0.010793	0.194274	2.16939	4.3
2011	3	Albania	358	Cabbages and other brassicas	16.3197	1762.53	2039.97	4.4
2011	79	Germany	358	Cabbages and other brassicas	470.308	4703.08	31980.9	3.061
2011	59	Egypt	358	Cabbages and other brassicas	3.63881	760.511	120.081	1.681
2011	231	United States	358	Cabbages and other brassicas	0.105697	12.5779	13.0007	22
2011	210	Sweden	358	Cabbages and other brassicas	105.391	1053.91	7482.76	20.223
2011	202	South Africa	358	Cabbages and other brassicas	0.426988	25.6193	37.575	2.449
2011	11	Austria	358	Cabbages and other brassicas	4.30719	111.987	327.346	2.873
2011	68	France	358	Cabbages and other brassicas	11.3689	454.755	1659.85	5.064
2011	174	Portugal	358	Cabbages and other brassicas	121.471	9474.77	17370.4	2.74
2011	126	Lithuania	358	Cabbages and other brassicas	0.188381	0.376763	27.8804	8.15
2011	119	Latvia	358	Cabbages and other brassicas	0.671719	0	112.849	8.345
2011	173	Poland	358	Cabbages and other brassicas	216.272	216.272	19032	3.103
2011	27	Bulgaria	358	Cabbages and other brassicas	0.123181	4.06496	19.8321	4.006
2011	63	Estonia	358	Cabbages and other brassicas	11.2278	11.2278	2189.41	8.345
2011	211	Switzerland	358	Cabbages and other brassicas	0.28591	0.28591	48.6047	1.642
2011	198	Slovenia	358	Cabbages and other brassicas	0.143297	0.286594	18.4853	4.224
2011	143	Morocco	358	Cabbages and other brassicas	4.17612	576.305	292.328	0.939
2011	255	Belgium	358	Cabbages and other brassicas	52.7512	158.254	6804.9	2.037
2011	84	Greece	358	Cabbages and other brassicas	1.77188	164.785	173.645	4.259
2011	199	Slovak Republic	358	Cabbages and other brassicas	0.700551	42.0331	131.003	3.987
2011	102	Iran	358	Cabbages and other brassicas	0.0418578	NA	NA	0.976
2011	222	Tunisia	358	Cabbages and other brassicas	0.034235	6.847	5.99112	0.869
2011	203	Spain	358	Cabbages and other brassicas	1745.58	153611	141392	2.701
2011	114	Kenya	358	Cabbages and other brassicas	1.11351	28.9511	242.744	1.018
2011	183	Romania	358	Cabbages and other brassicas	1.0415	16.6639	163.515	4.002
2011	138	Mexico	358	Cabbages and other brassicas	0.0191493	1.12981	0.919165	4.236
2011	104	Ireland	358	Cabbages and other brassicas	0.0264278	0	1.79709	19.74
2011	229	United Kingdom	358	Cabbages and other brassicas	2.40197	16.8138	307.452	5.868
2011	54	Denmark	358	Cabbages and other brassicas	0.488665	2.93199	47.8891	7.856
2011	167	Czech Republic	358	Cabbages and other brassicas	53.8336	538.336	5329.53	3.932
2011	106	Italy	358	Cabbages and other brassicas	224.066	15012.4	41228.2	2.273
2011	80	Bosnia and Herzegovina	358	Cabbages and other brassicas	2.50953	35.1334	908.45	4.4
2011	97	Hungary	358	Cabbages and other brassicas	1557.18	45158.1	202433	4.007
2011	223	Turkey	358	Cabbages and other brassicas	0.858451	77.2606	79.836	1.801
2011	165	Pakistan	358	Cabbages and other brassicas	0.0366001	6.91742	2.56201	0.594
2011	154	NA	358	Cabbages and other brassicas	29.6211	NA	NA	NA
2011	150	Netherlands	358	Cabbages and other brassicas	881.624	2644.87	92570.5	3.277
2011	134	Malta	358	Cabbages and other brassicas	0.0211431	2.02973	2.76974	NA
2011	162	Norway	358	Cabbages and other brassicas	0.42133	2.10665	44.2397	55.393
2011	98	Croatia	358	Cabbages and other brassicas	0.0813856	0.244157	24.5785	4.398
2011	106	Italy	366	Artichokes	5.28789	872.501	3040.53	2.273
2011	105	Israel	366	Artichokes	0.0288937	40.769	11.0085	0.486
2011	222	Tunisia	366	Artichokes	0.140947	14.9404	86.5414	0.869
2011	48	Costa Rica	366	Artichokes	0.012383	0	0	4.51
2011	203	Spain	366	Artichokes	66.415	10227.9	20455.8	2.701
2011	143	Morocco	366	Artichokes	0.393121	85.3072	100.246	0.939
2011	68	France	366	Artichokes	27.4874	7916.38	25865.7	5.064
2011	59	Egypt	366	Artichokes	0.196638	166.355	12.1915	1.681
2011	79	Germany	367	Asparagus	21.8786	3763.12	26385.6	3.061
2011	58	Ecuador	367	Asparagus	0.347329	223.333	838.106	2.575
2011	231	United States	367	Asparagus	0.216672	289.691	206.489	22
2011	216	Thailand	367	Asparagus	0.679083	203.725	1656.96	3.613
2011	106	Italy	367	Asparagus	6.29877	2418.73	5265.77	2.273
2011	229	United Kingdom	367	Asparagus	0.0326476	3.428	65.6544	5.868
2011	170	Peru	367	Asparagus	114.931	54937.1	66889.9	7.61
2011	138	Mexico	367	Asparagus	6.30822	4491.45	8061.9	4.236
2011	154	NA	367	Asparagus	0.147535	NA	NA	NA
2011	199	Slovak Republic	367	Asparagus	0.184067	53.0112	172.838	3.987
2011	68	France	367	Asparagus	1.93166	737.896	3320.53	5.064
2011	11	Austria	367	Asparagus	0.699611	218.279	652.038	2.873
2011	114	Kenya	367	Asparagus	0.12866	8.87755	144.357	1.018
2011	173	Poland	367	Asparagus	1.90506	22.8607	933.48	3.103
2011	9	Argentina	367	Asparagus	0.0101625	5.85357	12.5608	13.678
2011	97	Hungary	367	Asparagus	197.887	49076	203428	4.007
2011	143	Morocco	367	Asparagus	2.3225	2371.27	1110.15	0.939
2011	41	China	367	Asparagus	0.0166067	0.464987	26.7533	1.508
2011	223	Turkey	367	Asparagus	0.0320572	20.0999	31.5764	1.801
2011	150	Netherlands	367	Asparagus	85.1332	1702.66	60785.1	3.277
2011	203	Spain	367	Asparagus	129.478	191886	130125	2.701
2011	84	Greece	367	Asparagus	3.12953	3930.7	2622.55	4.259
2011	255	Belgium	367	Asparagus	31.6139	537.436	23267.8	2.037
2011	167	Czech Republic	367	Asparagus	2.65854	172.805	1733.37	3.932
2011	105	Israel	372	Lettuce and chicory	0.313089	41.6409	4.69634	0.486
2011	255	Belgium	372	Lettuce and chicory	303.101	1212.4	21217	2.037
2011	211	Switzerland	372	Lettuce and chicory	0.057509	0.172527	9.25894	1.642
2011	79	Germany	372	Lettuce and chicory	1463.07	1463.07	174105	3.061
2011	112	Jordan	372	Lettuce and chicory	0.0215361	0.689156	1.05527	0.108
2011	198	Slovenia	372	Lettuce and chicory	0.202335	0.202335	13.3541	4.224
2011	100	India	372	Lettuce and chicory	0.171309	3.25487	88.7381	0.881
2011	59	Egypt	372	Lettuce and chicory	23.1495	3842.82	370.392	1.681
2011	231	United States	372	Lettuce and chicory	0.108731	4.56671	3.26194	22
2011	138	Mexico	372	Lettuce and chicory	0.796518	39.0294	92.3961	4.236
2011	68	France	372	Lettuce and chicory	298.087	4769.4	28318.3	5.064
2011	150	Netherlands	372	Lettuce and chicory	2036.3	10181.5	134396	3.277
2011	199	Slovak Republic	372	Lettuce and chicory	0.021196	2.28916	6.76151	3.987
2011	143	Morocco	372	Lettuce and chicory	13.6197	367.731	939.757	0.939
2011	174	Portugal	372	Lettuce and chicory	46.4749	2416.7	3113.82	2.74
2011	183	Romania	372	Lettuce and chicory	0.0318969	0.542247	8.93113	4.002
2011	104	Ireland	372	Lettuce and chicory	0.119242	0	9.89713	19.74
2011	203	Spain	372	Lettuce and chicory	16100.3	1.17532e+06	756714	2.701
2011	58	Ecuador	372	Lettuce and chicory	0.706103	87.5568	158.167	2.575
2011	167	Czech Republic	372	Lettuce and chicory	0.24611	1.23055	55.1285	3.932
2011	223	Turkey	372	Lettuce and chicory	0.757793	48.4988	62.1391	1.801
2011	106	Italy	372	Lettuce and chicory	709.103	27655	97856.2	2.273
2011	11	Austria	372	Lettuce and chicory	7.75588	31.0235	690.274	2.873
2011	84	Greece	372	Lettuce and chicory	5.73904	585.382	315.647	4.259
2011	54	Denmark	372	Lettuce and chicory	62.2271	62.2271	5040.4	7.856
2011	229	United Kingdom	372	Lettuce and chicory	7.66532	38.3266	728.205	5.868
2011	3	Albania	372	Lettuce and chicory	0.955513	0	0	4.4
2011	41	China	372	Lettuce and chicory	1.26854	7.61121	216.92	1.508
2011	162	Norway	372	Lettuce and chicory	0.458676	1.37603	51.8304	55.393
2011	216	Thailand	372	Lettuce and chicory	0.0411388	0.534804	9.00939	3.613
2011	222	Tunisia	372	Lettuce and chicory	20.8911	125.347	1211.69	0.869
2011	40	Chile	372	Lettuce and chicory	14.4115	4871.09	1066.45	21.914
2011	97	Hungary	372	Lettuce and chicory	1.09435	9.84917	132.417	4.007
2011	119	Latvia	372	Lettuce and chicory	2.14727	2.14727	2059.23	8.345
2011	173	Poland	372	Lettuce and chicory	18.1292	0	4332.88	3.103
2011	134	Malta	372	Lettuce and chicory	1.04793	68.1154	35.6296	NA
2011	210	Sweden	372	Lettuce and chicory	1657.98	3315.96	162482	20.223
2011	59	Egypt	373	Spinach	0.106564	25.0427	2.45098	1.681
2011	223	Turkey	373	Spinach	0.53061	27.5917	61.5508	1.801
2011	50	Cyprus	373	Spinach	0.0105092	1.57639	1.10347	NA
2011	3	Albania	373	Spinach	0.0130037	1.11832	1.35238	4.4
2011	79	Germany	373	Spinach	2.59999	2.59999	215.799	3.061
2011	203	Spain	373	Spinach	44.2895	5049	3144.55	2.701
2011	68	France	373	Spinach	0.940077	10.3408	69.5657	5.064
2011	150	Netherlands	373	Spinach	14.2209	85.3254	796.37	3.277
2011	255	Belgium	373	Spinach	2.89455	8.68366	173.673	2.037
2011	106	Italy	373	Spinach	32.4506	908.616	3309.96	2.273
2011	11	Austria	373	Spinach	0.594698	1.78409	41.0342	2.873
2011	54	Denmark	373	Spinach	3.96719	0	0	7.856
2011	174	Portugal	373	Spinach	1.33793	90.9793	112.386	2.74
2011	146	Moldova	388	Tomatoes	1.58705	358.674	477.703	4.089
2011	162	Norway	388	Tomatoes	2.76784	5.53568	27.6784	55.393
2011	9	Argentina	388	Tomatoes	0.24781	8.17774	18.5858	13.678
2011	249	Yemen	388	Tomatoes	0.0113229	2.84204	1.40404	0.408
2011	137	Mauritius	388	Tomatoes	0.0445527	0.0445527	16.4845	NA
2011	255	Belgium	388	Tomatoes	202.527	0	2227.8	2.037
2011	222	Tunisia	388	Tomatoes	27.5646	1323.1	1653.87	0.869
2011	80	Bosnia and Herzegovina	388	Tomatoes	0.0403561	1.0089	19.8955	4.4
2011	143	Morocco	388	Tomatoes	320.669	16354.1	14109.5	0.939
2011	158	Niger	388	Tomatoes	6.5982	811.578	224.339	1.614
2011	150	Netherlands	388	Tomatoes	9215.11	0	64505.8	3.277
2011	156	New Zealand	388	Tomatoes	0.0273675	0.519983	1.06733	58.852
2011	299	NA	388	Tomatoes	1.82984	67.704	58.5548	NA
2011	173	Poland	388	Tomatoes	531.318	1593.95	90324.1	3.103
2011	121	Lebanon	388	Tomatoes	0.656836	30.2144	28.2439	0.544
2011	272	Serbia	388	Tomatoes	0.569334	NA	NA	4.37
2011	229	United Kingdom	388	Tomatoes	10.5755	10.5755	95.1799	5.868
2011	102	Iran	388	Tomatoes	2.06224	NA	NA	0.976
2011	84	Greece	388	Tomatoes	6647.06	152882	279176	4.259
2011	233	Burkina Faso	388	Tomatoes	0.0590041	3.54025	9.26365	0.973
2011	221	Oman	388	Tomatoes	0.0139962	1.8195	0.587839	0.707
2011	52	Azerbaijan	388	Tomatoes	0.0169787	3.70137	1.78277	1.916
2011	203	Spain	388	Tomatoes	12054	277241	421888	2.701
2011	126	Lithuania	388	Tomatoes	2.15215	15.0651	1007.21	8.15
2011	198	Slovenia	388	Tomatoes	3.23188	32.3188	478.318	4.224
2011	195	Senegal	388	Tomatoes	36.0957	5558.74	1118.97	1.544
2011	171	Philippines	388	Tomatoes	0.0137119	0.452493	5.95097	3.939
2011	194	Saudi Arabia	388	Tomatoes	1.08251	300.937	68.1979	0.479
2011	97	Hungary	388	Tomatoes	77.4403	2245.77	8286.11	4.007
2011	174	Portugal	388	Tomatoes	7570.83	121133	310404	2.74
2011	106	Italy	388	Tomatoes	24905	772055	1.61882e+06	2.273
2011	27	Bulgaria	388	Tomatoes	7.46134	320.838	1462.42	4.006
2011	225	United Arab Emirates	388	Tomatoes	0.09852	3.74376	5.12304	0.37
2011	63	Estonia	388	Tomatoes	15.7445	15.7445	1684.66	8.345
2011	131	Malaysia	388	Tomatoes	0.210301	6.72962	47.9486	25.815
2011	33	Canada	388	Tomatoes	7.87117	0	393.559	110.909
2011	81	Ghana	388	Tomatoes	5.99988	131.997	3167.94	2.981
2011	21	Brazil	388	Tomatoes	0.0251229	0.477336	1.70836	16.749
2011	235	Uzbekistan	388	Tomatoes	0.0119262	3.554	0.751349	1.147
2011	89	Guatemala	388	Tomatoes	1.66998	35.0697	228.788	4.459
2011	210	Sweden	388	Tomatoes	15.9809	31.9619	143.828	20.223
2011	40	Chile	388	Tomatoes	29.8935	119.574	1016.38	21.914
2011	57	Belarus	388	Tomatoes	0.0252178	0.0252178	5.34617	5.092
2011	105	Israel	388	Tomatoes	817.575	21257	20439.4	0.486
2011	68	France	388	Tomatoes	464.308	5107.39	13464.9	5.064
2011	170	Peru	388	Tomatoes	0.294047	18.819	27.6404	7.61
2011	11	Austria	388	Tomatoes	12.6696	76.0177	291.401	2.873
2011	223	Turkey	388	Tomatoes	423.788	23732.2	25427.3	1.801
2011	48	Costa Rica	388	Tomatoes	0.020029	0.821191	1.80261	4.51
2011	119	Latvia	388	Tomatoes	1.80217	1.80217	639.771	8.345
2011	50	Cyprus	388	Tomatoes	8.57091	231.415	179.989	NA
2011	98	Croatia	388	Tomatoes	0.334593	1.67297	124.803	4.398
2011	238	Ethiopia	388	Tomatoes	0.059004	NA	NA	0.815
2011	41	China	388	Tomatoes	7583.04	22749.1	1.38011e+06	1.508
2011	59	Egypt	388	Tomatoes	33.8668	5012.28	846.67	1.681
2011	4	Algeria	388	Tomatoes	0.0868363	5.73119	10.5072	0.85
2011	154	NA	388	Tomatoes	30.7999	NA	NA	NA
2011	54	Denmark	388	Tomatoes	40.7551	40.7551	407.551	7.856
2011	10	Australia	388	Tomatoes	0.0230469	1.61328	0.852736	53.268
2011	104	Ireland	388	Tomatoes	2.34767	0	28.1721	19.74
2011	202	South Africa	388	Tomatoes	0.527525	25.8487	27.9588	2.449
2011	3	Albania	388	Tomatoes	10.7968	1166.06	1047.29	4.4
2011	211	Switzerland	388	Tomatoes	5.98652	0	191.569	1.642
2011	231	United States	388	Tomatoes	1342.88	99372.9	41629.2	22
2011	183	Romania	388	Tomatoes	6.24242	162.303	1460.73	4.002
2011	185	Russia	388	Tomatoes	0.944019	37.7607	273.765	12.681
2011	165	Pakistan	388	Tomatoes	0.207303	76.702	24.669	0.594
2011	56	Dominican Republic	388	Tomatoes	1.09091	8.72724	126.545	1.03
2011	100	India	388	Tomatoes	1.10737	64.2272	139.528	0.881
2011	159	Nigeria	388	Tomatoes	0.0194706	4.40035	6.26952	2.328
2011	1	Armenia	388	Tomatoes	0.0487511	6.09389	3.75384	1.896
2011	134	Malta	388	Tomatoes	0.0309485	0.835609	1.36173	NA
2011	212	Syria	388	Tomatoes	0.798047	40.7004	39.9024	0.976
2011	95	Honduras	388	Tomatoes	0.0155028	0.682125	3.00755	4.51
2011	79	Germany	388	Tomatoes	218.474	1092.37	4806.42	3.061
2011	199	Slovak Republic	388	Tomatoes	1.40267	105.201	244.065	3.987
2011	112	Jordan	388	Tomatoes	3.55358	305.608	149.25	0.108
2011	110	Japan	388	Tomatoes	1.63869	0	119.625	3.555
2011	167	Czech Republic	388	Tomatoes	1.05988	29.6766	217.275	3.932
2011	216	Thailand	388	Tomatoes	0.183118	9.33902	28.7495	3.613
2011	138	Mexico	388	Tomatoes	129.648	11020	7908.5	4.236
2011	230	Ukraine	388	Tomatoes	11.627	360.436	3685.75	4.3
2011	255	Belgium	393	Cauliflowers and broccoli	58.2105	407.474	10186.8	2.037
2011	104	Ireland	393	Cauliflowers and broccoli	0.0135077	0.0135077	4.05232	19.74
2011	229	United Kingdom	393	Cauliflowers and broccoli	2.16456	19.481	489.191	5.868
2011	211	Switzerland	393	Cauliflowers and broccoli	0.169157	0.338315	41.6127	1.642
2011	54	Denmark	393	Cauliflowers and broccoli	3.04661	3.04661	776.886	7.856
2011	59	Egypt	393	Cauliflowers and broccoli	0.169727	30.7205	3.39453	1.681
2011	210	Sweden	393	Cauliflowers and broccoli	151.382	302.763	21950.3	20.223
2011	173	Poland	393	Cauliflowers and broccoli	16.3902	0	2720.77	3.103
2011	106	Italy	393	Cauliflowers and broccoli	158.39	5702.04	22016.2	2.273
2011	89	Guatemala	393	Cauliflowers and broccoli	1.34074	4.02221	390.154	4.459
2011	97	Hungary	393	Cauliflowers and broccoli	0.112045	1.34454	19.2717	4.007
2011	199	Slovak Republic	393	Cauliflowers and broccoli	0.0363665	2.72749	9.38256	3.987
2011	223	Turkey	393	Cauliflowers and broccoli	0.0169841	1.05302	1.46063	1.801
2011	212	Syria	393	Cauliflowers and broccoli	0.0190008	4.21818	0.361015	0.976
2011	68	France	393	Cauliflowers and broccoli	482.338	14470.2	98397	5.064
2011	11	Austria	393	Cauliflowers and broccoli	0.236059	1.1803	30.4516	2.873
2011	167	Czech Republic	393	Cauliflowers and broccoli	0.786492	3.14597	163.59	3.932
2011	143	Morocco	393	Cauliflowers and broccoli	0.648348	17.5054	56.4063	0.939
2011	203	Spain	393	Cauliflowers and broccoli	1443.55	150129	106823	2.701
2011	58	Ecuador	393	Cauliflowers and broccoli	274.389	335029	584175	2.575
2011	174	Portugal	393	Cauliflowers and broccoli	3.30423	185.037	264.338	2.74
2011	150	Netherlands	393	Cauliflowers and broccoli	435.445	4789.9	77944.7	3.277
2011	84	Greece	393	Cauliflowers and broccoli	0.375673	40.197	23.6674	4.259
2011	41	China	393	Cauliflowers and broccoli	0.0198823	0.119294	3.67822	1.508
2011	134	Malta	393	Cauliflowers and broccoli	0.018263	1.20536	0.693992	NA
2011	79	Germany	393	Cauliflowers and broccoli	258.743	258.743	31566.7	3.061
2011	112	Jordan	394	Pumpkins, squash and gourds	0.423678	11.4393	44.4861	0.108
2011	79	Germany	394	Pumpkins, squash and gourds	104.789	0	0	3.061
2011	212	Syria	394	Pumpkins, squash and gourds	0.0102037	2.96928	0.867314	0.976
2011	203	Spain	394	Pumpkins, squash and gourds	2194.56	72420.3	109728	2.701
2011	202	South Africa	394	Pumpkins, squash and gourds	2.03488	189.244	321.511	2.449
2011	223	Turkey	394	Pumpkins, squash and gourds	3.03764	130.619	434.383	1.801
2011	105	Israel	394	Pumpkins, squash and gourds	0.782156	60.226	24.2468	0.486
2011	174	Portugal	394	Pumpkins, squash and gourds	1.40344	56.1375	150.168	2.74
2011	54	Denmark	394	Pumpkins, squash and gourds	0.304511	0	18.2707	7.856
2011	59	Egypt	394	Pumpkins, squash and gourds	0.023595	4.34148	1.43929	1.681
2011	222	Tunisia	394	Pumpkins, squash and gourds	0.0299891	0.0599782	4.58833	0.869
2011	150	Netherlands	394	Pumpkins, squash and gourds	368.354	368.354	15102.5	3.277
2011	143	Morocco	394	Pumpkins, squash and gourds	60.1119	420.784	5229.74	0.939
2011	119	Latvia	394	Pumpkins, squash and gourds	0.538344	0	99.5937	8.345
2011	156	New Zealand	394	Pumpkins, squash and gourds	0.0523925	0.733495	8.17323	58.852
2011	173	Poland	394	Pumpkins, squash and gourds	1.63306	0	269.455	3.103
2011	255	Belgium	394	Pumpkins, squash and gourds	73.2174	0	0	2.037
2011	68	France	394	Pumpkins, squash and gourds	12.6061	63.0306	832.004	5.064
2011	84	Greece	394	Pumpkins, squash and gourds	0.674829	45.8883	57.3604	4.259
2011	11	Austria	394	Pumpkins, squash and gourds	2.93244	2.93244	184.744	2.873
2011	97	Hungary	394	Pumpkins, squash and gourds	0.0670646	0.268259	8.51721	4.007
2011	106	Italy	394	Pumpkins, squash and gourds	56.245	956.164	5230.78	2.273
2011	98	Croatia	397	Cucumbers and gherkins	0.124284	0.372851	35.6694	4.398
2011	97	Hungary	397	Cucumbers and gherkins	13.0917	248.742	1400.81	4.007
2011	50	Cyprus	397	Cucumbers and gherkins	0.0176086	0.862822	0.369781	NA
2011	174	Portugal	397	Cucumbers and gherkins	0.739474	39.9316	70.9895	2.74
2011	198	Slovenia	397	Cucumbers and gherkins	0.113026	0.226052	19.4405	4.224
2011	167	Czech Republic	397	Cucumbers and gherkins	4.10853	69.845	1060	3.932
2011	183	Romania	397	Cucumbers and gherkins	18.1828	272.742	3472.92	4.002
2011	56	Dominican Republic	397	Cucumbers and gherkins	0.0115491	0.0346472	4.83906	1.03
2011	121	Lebanon	397	Cucumbers and gherkins	0.0310266	2.26494	0.899772	0.544
2011	59	Egypt	397	Cucumbers and gherkins	0.712988	145.449	44.2052	1.681
2011	119	Latvia	397	Cucumbers and gherkins	0.73585	0.73585	286.982	8.345
2011	80	Bosnia and Herzegovina	397	Cucumbers and gherkins	3.09423	55.6961	1426.44	4.4
2011	3	Albania	397	Cucumbers and gherkins	0.154486	12.0499	13.4403	4.4
2011	58	Ecuador	397	Cucumbers and gherkins	0.453875	38.1255	127.085	2.575
2011	162	Norway	397	Cucumbers and gherkins	0.0649194	0.0649194	1.55807	55.393
2011	255	Belgium	397	Cucumbers and gherkins	51.1059	51.1059	919.906	2.037
2011	126	Lithuania	397	Cucumbers and gherkins	0.151218	0.302435	57.1602	8.15
2011	229	United Kingdom	397	Cucumbers and gherkins	5.40643	0	32.4386	5.868
2011	210	Sweden	397	Cucumbers and gherkins	52.7803	105.561	1530.63	20.223
2011	68	France	397	Cucumbers and gherkins	9.60124	48.0062	230.43	5.064
2011	84	Greece	397	Cucumbers and gherkins	37.9541	910.898	986.806	4.259
2011	203	Spain	397	Cucumbers and gherkins	5133.28	164265	164265	2.701
2011	272	Serbia	397	Cucumbers and gherkins	0.055663	NA	NA	4.37
2011	106	Italy	397	Cucumbers and gherkins	2.87477	97.7423	307.601	2.273
2011	79	Germany	397	Cucumbers and gherkins	913.276	4566.38	55709.8	3.061
2011	63	Estonia	397	Cucumbers and gherkins	12.5805	0	1220.31	8.345
2011	105	Israel	397	Cucumbers and gherkins	0.713353	27.1074	14.2671	0.486
2011	143	Morocco	397	Cucumbers and gherkins	7.0425	436.635	274.657	0.939
2011	112	Jordan	397	Cucumbers and gherkins	1.7356	69.4241	27.7696	0.108
2011	104	Ireland	397	Cucumbers and gherkins	0.0662875	0	1.52461	19.74
2011	223	Turkey	397	Cucumbers and gherkins	29.9183	1645.51	2273.79	1.801
2011	11	Austria	397	Cucumbers and gherkins	22.2163	244.38	999.735	2.873
2011	102	Iran	397	Cucumbers and gherkins	0.0816582	NA	NA	0.976
2011	41	China	397	Cucumbers and gherkins	0.122693	0.245386	29.3236	1.508
2011	27	Bulgaria	397	Cucumbers and gherkins	19.9057	537.454	3463.59	4.006
2011	54	Denmark	397	Cucumbers and gherkins	0.427402	0	5.12882	7.856
2011	173	Poland	397	Cucumbers and gherkins	18.1322	18.1322	3735.23	3.103
2011	154	NA	397	Cucumbers and gherkins	2.04472	NA	NA	NA
2011	212	Syria	397	Cucumbers and gherkins	0.0144505	3.58373	1.44505	0.976
2011	150	Netherlands	397	Cucumbers and gherkins	3650.92	0	14603.7	3.277
2011	199	Slovak Republic	397	Cucumbers and gherkins	0.43075	29.291	119.748	3.987
2011	68	France	399	Eggplants (aubergines)	0.935635	23.3909	74.8508	5.064
2011	81	Ghana	399	Eggplants (aubergines)	0.303942	1.82365	277.803	2.981
2011	203	Spain	399	Eggplants (aubergines)	368.231	40137.1	18411.5	2.701
2011	223	Turkey	399	Eggplants (aubergines)	4.99706	379.777	409.759	1.801
2011	41	China	399	Eggplants (aubergines)	0.0142777	0.0571109	3.32671	1.508
2011	101	Indonesia	399	Eggplants (aubergines)	0.379912	18.9956	229.087	16.287
2011	174	Portugal	399	Eggplants (aubergines)	0.14646	18.454	15.0854	2.74
2011	126	Lithuania	399	Eggplants (aubergines)	0.0204599	0.265978	17.7387	8.15
2011	222	Tunisia	399	Eggplants (aubergines)	0.0410798	0.205399	5.46362	0.869
2011	143	Morocco	399	Eggplants (aubergines)	0.209339	3.97744	26.1673	0.939
2011	102	Iran	399	Eggplants (aubergines)	0.0255111	NA	NA	0.976
2011	50	Cyprus	399	Eggplants (aubergines)	0.980095	64.6863	35.2834	NA
2011	106	Italy	399	Eggplants (aubergines)	4.15284	191.031	436.049	2.273
2011	11	Austria	399	Eggplants (aubergines)	0.439305	0.439305	48.3235	2.873
2011	32	Cameroon	399	Eggplants (aubergines)	0.0315846	0.157923	35.3432	4.848
2011	97	Hungary	399	Eggplants (aubergines)	0.0162333	0.1461	2.95446	4.007
2011	216	Thailand	399	Eggplants (aubergines)	1.0145	37.5366	797.399	3.613
2011	255	Belgium	399	Eggplants (aubergines)	7.31403	7.31403	468.098	2.037
2011	56	Dominican Republic	399	Eggplants (aubergines)	1.80294	57.6942	1245.83	1.03
2011	112	Jordan	399	Eggplants (aubergines)	0.125191	11.3924	8.88856	0.108
2011	154	NA	399	Eggplants (aubergines)	0.0141964	NA	NA	NA
2011	59	Egypt	399	Eggplants (aubergines)	0.0418531	12.0955	1.59042	1.681
2011	84	Greece	399	Eggplants (aubergines)	0.166886	27.3692	11.5151	4.259
2011	150	Netherlands	399	Eggplants (aubergines)	552.814	0	3869.69	3.277
2011	100	India	399	Eggplants (aubergines)	0.0866948	1.7339	25.3149	0.881
2011	223	Turkey	401	Chillies and peppers, green	59.6435	5487.2	6024	1.801
2011	143	Morocco	401	Chillies and peppers, green	197.906	2968.59	15436.7	0.939
2011	212	Syria	401	Chillies and peppers, green	0.093945	2.44257	11.2734	0.976
2011	255	Belgium	401	Chillies and peppers, green	93.6494	280.948	7304.65	2.037
2011	299	NA	401	Chillies and peppers, green	0.333602	7.00565	20.0161	NA
2011	183	Romania	401	Chillies and peppers, green	0.345626	10.7144	95.7383	4.002
2011	68	France	401	Chillies and peppers, green	6.27848	175.798	539.95	5.064
2011	59	Egypt	401	Chillies and peppers, green	5.09666	830.755	417.926	1.681
2011	221	Oman	401	Chillies and peppers, green	0.0116237	1.75518	0.709044	0.707
2011	81	Ghana	401	Chillies and peppers, green	0.779438	46.7663	396.734	2.981
2011	146	Moldova	401	Chillies and peppers, green	0.0141548	4.388	5.97335	4.089
2011	56	Dominican Republic	401	Chillies and peppers, green	2.97598	38.6878	1693.33	1.03
2011	84	Greece	401	Chillies and peppers, green	17.0887	17.0887	820.258	4.259
2011	181	Zimbabwe	401	Chillies and peppers, green	1.535	0	0	1.66
2011	222	Tunisia	401	Chillies and peppers, green	0.0300453	0.210317	4.71712	0.869
2011	101	Indonesia	401	Chillies and peppers, green	0.684178	8.89431	686.23	16.287
2011	102	Iran	401	Chillies and peppers, green	0.0124161	NA	NA	0.976
2011	138	Mexico	401	Chillies and peppers, green	0.992684	81.4001	128.056	4.236
2011	216	Thailand	401	Chillies and peppers, green	1.40002	105.002	224.004	3.613
2011	58	Ecuador	401	Chillies and peppers, green	0.0126283	1.45225	6.62983	2.575
2011	170	Peru	401	Chillies and peppers, green	1.80849	455.739	745.098	7.61
2011	50	Cyprus	401	Chillies and peppers, green	0.0641947	0.641947	4.62202	NA
2011	114	Kenya	401	Chillies and peppers, green	2.12837	185.168	1336.62	1.018
2011	104	Ireland	401	Chillies and peppers, green	0.0121685	0	0	19.74
2011	33	Canada	401	Chillies and peppers, green	0.0414008	0	6.58272	110.909
2011	154	NA	401	Chillies and peppers, green	9.32736	NA	NA	NA
2011	89	Guatemala	401	Chillies and peppers, green	0.690705	55.9471	93.9359	4.459
2011	184	Rwanda	401	Chillies and peppers, green	8.29121	0	0	0.362
2011	27	Bulgaria	401	Chillies and peppers, green	1.65083	89.1451	396.2	4.006
2011	273	Montenegro	401	Chillies and peppers, green	0.013444	NA	NA	4.4
2011	112	Jordan	401	Chillies and peppers, green	3.31667	116.083	271.967	0.108
2011	202	South Africa	401	Chillies and peppers, green	0.395191	0	0	2.449
2011	131	Malaysia	401	Chillies and peppers, green	0.579889	0	0	25.815
2011	106	Italy	401	Chillies and peppers, green	40.3285	2097.08	4597.45	2.273
2011	98	Croatia	401	Chillies and peppers, green	0.189369	1.32558	82.3755	4.398
2011	167	Czech Republic	401	Chillies and peppers, green	0.67547	15.5358	126.313	3.932
2011	203	Spain	401	Chillies and peppers, green	5850.16	17550.5	228156	2.701
2011	79	Germany	401	Chillies and peppers, green	9.02308	0	0	3.061
2011	11	Austria	401	Chillies and peppers, green	13.0865	418.769	942.23	2.873
2011	95	Honduras	401	Chillies and peppers, green	0.0310693	1.14956	16.4357	4.51
2011	272	Serbia	401	Chillies and peppers, green	6.41485	NA	NA	4.37
2011	80	Bosnia and Herzegovina	401	Chillies and peppers, green	0.369726	8.13398	148.26	4.4
2011	150	Netherlands	401	Chillies and peppers, green	6252.69	0	68779.6	3.277
2011	97	Hungary	401	Chillies and peppers, green	122.518	5390.8	19725.4	4.007
2011	230	Ukraine	401	Chillies and peppers, green	0.113218	4.18907	41.7775	4.3
2011	199	Slovak Republic	401	Chillies and peppers, green	1.95482	187.663	457.429	3.987
2011	129	Madagascar	401	Chillies and peppers, green	0.0150168	0	0	5.758
2011	100	India	401	Chillies and peppers, green	0.752515	51.171	136.205	0.881
2011	41	China	401	Chillies and peppers, green	1.46385	5.85538	314.727	1.508
2011	198	Slovenia	401	Chillies and peppers, green	5.78052	52.0247	780.371	4.224
2011	48	Costa Rica	401	Chillies and peppers, green	0.604647	0	0	4.51
2011	231	United States	401	Chillies and peppers, green	0.445281	43.1923	42.3017	22
2011	19	Bolivia	401	Chillies and peppers, green	0.0570772	23.3446	134.189	11.75
2011	238	Ethiopia	401	Chillies and peppers, green	0.100235	NA	NA	0.815
2011	174	Portugal	401	Chillies and peppers, green	2.85348	2.85348	1001.57	2.74
2011	105	Israel	401	Chillies and peppers, green	852.141	8521.41	43459.2	0.486
2011	229	United Kingdom	401	Chillies and peppers, green	4.27826	4.27826	55.6173	5.868
2011	68	France	402	Onions, shallots, green	47.2347	566.816	3495.36	5.064
2011	150	Netherlands	402	Onions, shallots, green	83.2768	666.214	5329.71	3.277
2011	156	New Zealand	402	Onions, shallots, green	77.1497	1234.4	4860.43	58.852
2011	203	Spain	402	Onions, shallots, green	1.762	202.63	135.674	2.701
2011	229	United Kingdom	402	Onions, shallots, green	0.0902941	1.71559	28.0815	5.868
2011	79	Germany	402	Onions, shallots, green	7.64137	0	0	3.061
2011	216	Thailand	402	Onions, shallots, green	0.283207	0	0	3.613
2011	223	Turkey	402	Onions, shallots, green	1.6616	237.609	310.719	1.801
2011	41	China	402	Onions, shallots, green	0.0940625	0.658438	16.3669	1.508
2011	222	Tunisia	402	Onions, shallots, green	0.154667	2.32001	9.12537	0.869
2011	4	Algeria	402	Onions, shallots, green	0.197699	0	0	0.85
2011	146	Moldova	403	Onions, dry	0.046638	21.8266	20.7539	4.089
2011	237	Vietnam	403	Onions, dry	0.0196277	17.4883	26.0068	3.809
2011	249	Yemen	403	Onions, dry	0.0223128	8.67968	2.94529	0.408
2011	97	Hungary	403	Onions, dry	1.02038	52.0396	128.568	4.007
2011	154	NA	403	Onions, dry	0.237408	NA	NA	NA
2011	11	Austria	403	Onions, dry	4.97753	238.921	393.225	2.873
2011	199	Slovak Republic	403	Onions, dry	0.0499842	9.04714	15.2952	3.987
2011	54	Denmark	403	Onions, dry	12.1602	194.563	1155.22	7.856
2011	230	Ukraine	403	Onions, dry	0.168615	7.25046	52.1021	4.3
2011	101	Indonesia	403	Onions, dry	0.0149198	0.253637	14.4275	16.287
2011	50	Cyprus	403	Onions, dry	0.0909712	4.82147	7.09575	NA
2011	106	Italy	403	Onions, dry	28.2803	1923.06	3733.01	2.273
2011	119	Latvia	403	Onions, dry	0.241152	0.723457	82.2329	8.345
2011	114	Kenya	403	Onions, dry	0.0432368	2.37802	16.3435	1.018
2011	229	United Kingdom	403	Onions, dry	70.0626	630.563	5114.57	5.868
2011	202	South Africa	403	Onions, dry	14.645	3382.99	3368.34	2.449
2011	10	Australia	403	Onions, dry	94.1966	14317.9	6687.96	53.268
2011	234	Uruguay	403	Onions, dry	0.139539	16.7447	80.5142	14.962
2011	134	Malta	403	Onions, dry	1.65767	97.8024	301.695	NA
2011	79	Germany	403	Onions, dry	978.43	26417.6	87080.3	3.061
2011	89	Guatemala	403	Onions, dry	0.0708799	3.61488	14.9557	4.459
2011	198	Slovenia	403	Onions, dry	0.0856517	2.74085	16.959	4.224
2011	222	Tunisia	403	Onions, dry	0.0586764	4.51808	11.0898	0.869
2011	165	Pakistan	403	Onions, dry	0.45255	157.035	36.6565	0.594
2011	48	Costa Rica	403	Onions, dry	0.0129157	0.942849	2.18276	4.51
2011	238	Ethiopia	403	Onions, dry	0.23389	NA	NA	0.815
2011	40	Chile	403	Onions, dry	60.9469	1340.83	4205.33	21.914
2011	126	Lithuania	403	Onions, dry	0.078257	0.78257	25.277	8.15
2011	121	Lebanon	403	Onions, dry	0.0271302	1.30225	3.4184	0.544
2011	158	Niger	403	Onions, dry	0.0197188	1.79441	0.236625	1.614
2011	41	China	403	Onions, dry	29.6495	237.196	6522.9	1.508
2011	212	Syria	403	Onions, dry	0.986242	86.7893	155.826	0.976
2011	143	Morocco	403	Onions, dry	5.23258	575.584	763.957	0.939
2011	33	Canada	403	Onions, dry	0.685615	0	58.9629	110.909
2011	195	Senegal	403	Onions, dry	0.0683197	10.248	2.86943	1.544
2011	129	Madagascar	403	Onions, dry	1.91495	74.6831	1646.86	5.758
2011	167	Czech Republic	403	Onions, dry	0.564505	23.1447	127.578	3.932
2011	104	Ireland	403	Onions, dry	0.143054	0.143054	11.5873	19.74
2011	272	Serbia	403	Onions, dry	0.0683562	NA	NA	4.37
2011	231	United States	403	Onions, dry	145.637	10777.2	7718.79	22
2011	84	Greece	403	Onions, dry	0.266299	6.39117	25.831	4.259
2011	174	Portugal	403	Onions, dry	1.66189	28.252	232.664	2.74
2011	173	Poland	403	Onions, dry	121.662	608.308	18249.3	3.103
2011	21	Brazil	403	Onions, dry	1.27595	51.038	514.208	16.749
2011	9	Argentina	403	Onions, dry	71.9867	7846.55	10870	13.678
2011	210	Sweden	403	Onions, dry	46.3183	1343.23	3612.83	20.223
2011	223	Turkey	403	Onions, dry	0.238369	20.9765	30.7496	1.801
2011	44	Colombia	403	Onions, dry	0.0188443	0.584174	3.41082	9.648
2011	138	Mexico	403	Onions, dry	21.9753	2768.89	1582.22	4.236
2011	100	India	403	Onions, dry	24.0089	3361.25	3721.38	0.881
2011	203	Spain	403	Onions, dry	413.764	13654.2	25239.6	2.701
2011	216	Thailand	403	Onions, dry	0.0635874	10.4919	14.3708	3.613
2011	150	Netherlands	403	Onions, dry	6674.09	33370.4	453838	3.277
2011	105	Israel	403	Onions, dry	0.0608937	4.20167	7.06367	0.486
2011	63	Estonia	403	Onions, dry	0.336133	4.36973	179.831	8.345
2011	215	Tanzania	403	Onions, dry	0.0122336	NA	NA	2.006
2011	255	Belgium	403	Onions, dry	37.4013	299.21	4151.54	2.037
2011	68	France	403	Onions, dry	112.28	4154.37	10217.5	5.064
2011	170	Peru	403	Onions, dry	8.70453	1122.88	1610.34	7.61
2011	59	Egypt	403	Onions, dry	126.213	29155.2	4796.1	1.681
2011	126	Lithuania	406	Garlic	0.093839	1.21991	38.2863	8.15
2011	27	Bulgaria	406	Garlic	0.114547	25.2004	91.1795	4.006
2011	170	Peru	406	Garlic	0.23239	107.829	124.561	7.61
2011	11	Austria	406	Garlic	0.0251219	0	4.64755	2.873
2011	183	Romania	406	Garlic	1.01468	92.3363	574.311	4.002
2011	181	Zimbabwe	406	Garlic	0.0934257	0	0	1.66
2011	138	Mexico	406	Garlic	12.8965	6125.84	2205.3	4.236
2011	106	Italy	406	Garlic	7.82055	109.488	1994.24	2.273
2011	203	Spain	406	Garlic	229.357	43119.1	72706.2	2.701
2011	63	Estonia	406	Garlic	0.958188	23.9547	1018.55	8.345
2011	102	Iran	406	Garlic	0.0313578	NA	NA	0.976
2011	68	France	406	Garlic	33.6076	302.468	9074.05	5.064
2011	84	Greece	406	Garlic	5.46648	475.584	1721.94	4.259
2011	174	Portugal	406	Garlic	0.168009	12.2647	96.2694	2.74
2011	199	Slovak Republic	406	Garlic	0.450365	182.398	299.492	3.987
2011	9	Argentina	406	Garlic	91.0621	28502.4	32782.4	13.678
2011	97	Hungary	406	Garlic	1.53802	243.008	581.373	4.007
2011	40	Chile	406	Garlic	8.06297	7700.13	2120.56	21.914
2011	143	Morocco	406	Garlic	0.508805	209.628	245.753	0.939
2011	119	Latvia	406	Garlic	0.105803	0.952231	107.073	8.345
2011	21	Brazil	406	Garlic	0.150691	17.9322	146.923	16.749
2011	214	Taiwan	406	Garlic	0.0839814	NA	NA	2
2011	59	Egypt	406	Garlic	23.2784	6680.9	768.188	1.681
2011	223	Turkey	406	Garlic	0.0199617	5.34975	7.52558	1.801
2011	167	Czech Republic	406	Garlic	0.012647	0.101176	4.24939	3.932
2011	129	Madagascar	406	Garlic	0.0216367	1.38475	27.7167	5.758
2011	41	China	406	Garlic	476.065	5236.71	145676	1.508
2011	134	Malta	406	Garlic	4.99354	843.909	2416.87	NA
2011	165	Pakistan	406	Garlic	0.0123129	6.84598	1.25592	0.594
2011	100	India	406	Garlic	0.0594756	22.006	21.887	0.881
2011	231	United States	406	Garlic	1.13786	211.641	131.991	22
2011	150	Netherlands	407	Leeks, other alliaceous vegetables	1031.06	NA	NA	3.277
2011	223	Turkey	407	Leeks, other alliaceous vegetables	2.38154	NA	NA	1.801
2011	79	Germany	407	Leeks, other alliaceous vegetables	41.71	NA	NA	3.061
2011	229	United Kingdom	407	Leeks, other alliaceous vegetables	0.0285325	NA	NA	5.868
2011	255	Belgium	407	Leeks, other alliaceous vegetables	279.569	NA	NA	2.037
2011	202	South Africa	407	Leeks, other alliaceous vegetables	0.248272	NA	NA	2.449
2011	143	Morocco	407	Leeks, other alliaceous vegetables	0.485471	NA	NA	0.939
2011	41	China	407	Leeks, other alliaceous vegetables	2.73866	NA	NA	1.508
2011	210	Sweden	407	Leeks, other alliaceous vegetables	0.493069	NA	NA	20.223
2011	173	Poland	407	Leeks, other alliaceous vegetables	12.0037	NA	NA	3.103
2011	11	Austria	407	Leeks, other alliaceous vegetables	0.278991	NA	NA	2.873
2011	238	Ethiopia	407	Leeks, other alliaceous vegetables	2.37901	NA	NA	0.815
2011	203	Spain	407	Leeks, other alliaceous vegetables	22.0336	NA	NA	2.701
2011	68	France	407	Leeks, other alliaceous vegetables	49.3052	NA	NA	5.064
2011	54	Denmark	407	Leeks, other alliaceous vegetables	0.0701417	NA	NA	7.856
2011	84	Greece	407	Leeks, other alliaceous vegetables	0.0247229	NA	NA	4.259
2011	114	Kenya	407	Leeks, other alliaceous vegetables	3.60224	NA	NA	1.018
2011	106	Italy	407	Leeks, other alliaceous vegetables	5.71454	NA	NA	2.273
2011	231	United States	414	Beans, green	0.1553	20.8101	50.3171	22
2011	216	Thailand	414	Beans, green	0.0119018	0.333251	8.12894	3.613
2011	238	Ethiopia	414	Beans, green	0.61802	NA	NA	0.815
2011	255	Belgium	414	Beans, green	19.5178	97.5892	2752.02	2.037
2011	223	Turkey	414	Beans, green	0.0380345	3.04276	6.84622	1.801
2011	102	Iran	414	Beans, green	0.0169739	NA	NA	0.976
2011	138	Mexico	414	Beans, green	0.186379	13.2329	42.4945	4.236
2011	173	Poland	414	Beans, green	0.0658754	0	7.18042	3.103
2011	174	Portugal	414	Beans, green	0.0363739	2.14606	5.23784	2.74
2011	11	Austria	414	Beans, green	0.019261	0.115566	3.54402	2.873
2011	79	Germany	414	Beans, green	2.16449	2.16449	439.39	3.061
2011	215	Tanzania	414	Beans, green	0.395234	NA	NA	2.006
2011	207	Suriname	414	Beans, green	0.0275813	0	3.75105	121.744
2011	233	Burkina Faso	414	Beans, green	0.0615773	0.0615773	15.3943	0.973
2011	97	Hungary	414	Beans, green	0.014558	0.189254	3.55216	4.007
2011	59	Egypt	414	Beans, green	3.80421	1008.12	201.623	1.681
2011	89	Guatemala	414	Beans, green	0.265538	0.531076	88.9552	4.459
2011	203	Spain	414	Beans, green	3.50061	308.053	357.062	2.701
2011	229	United Kingdom	414	Beans, green	0.64341	3.86046	107.449	5.868
2011	181	Zimbabwe	414	Beans, green	0.0882062	0	0	1.66
2011	41	China	414	Beans, green	0.046485	0.325395	10.2267	1.508
2011	170	Peru	414	Beans, green	0.0206404	3.55015	15.2326	7.61
2011	250	Congo, Dem. Rep.	414	Beans, green	0.0132094	NA	NA	7.345
2011	150	Netherlands	414	Beans, green	29.0923	232.739	4596.59	3.277
2011	143	Morocco	414	Beans, green	13.7668	289.102	1004.97	0.939
2011	195	Senegal	414	Beans, green	2.22563	97.9279	396.163	1.544
2011	106	Italy	414	Beans, green	1.382	69.1002	315.097	2.273
2011	184	Rwanda	414	Beans, green	0.429171	0	0	0.362
2011	183	Romania	414	Beans, green	0.0192024	0.345644	8.19944	4.002
2011	68	France	414	Beans, green	2.79958	61.5908	489.927	5.064
2011	114	Kenya	414	Beans, green	5.44663	38.1264	2352.95	1.018
2011	23	Belize	417	Peas, green	0.0180344	0	0	5.148
2011	255	Belgium	417	Peas, green	9.49378	94.9378	2098.13	2.037
2011	173	Poland	417	Peas, green	0.0800979	0.0800979	43.5732	3.103
2011	54	Denmark	417	Peas, green	39.2864	117.859	17443.2	7.856
2011	27	Bulgaria	417	Peas, green	0.0146627	1.01172	11.2463	4.006
2011	215	Tanzania	417	Peas, green	0.0298399	NA	NA	2.006
2011	68	France	417	Peas, green	15.6106	374.655	2560.14	5.064
2011	203	Spain	417	Peas, green	0.683684	209.891	172.972	2.701
2011	59	Egypt	417	Peas, green	0.570418	267.526	42.7814	1.681
2011	199	Slovak Republic	417	Peas, green	0.0761414	20.0252	71.9536	3.987
2011	146	Moldova	417	Peas, green	0.0619288	41.0588	60.876	4.089
2011	238	Ethiopia	417	Peas, green	0.207859	NA	NA	0.815
2011	11	Austria	417	Peas, green	0.194188	3.3012	86.8022	2.873
2011	129	Madagascar	417	Peas, green	0.0698398	1.81583	290.743	5.758
2011	181	Zimbabwe	417	Peas, green	1.57193	0	0	1.66
2011	183	Romania	417	Peas, green	5.65277	180.889	3747.79	4.002
2011	165	Pakistan	417	Peas, green	0.0175824	3.32307	1.4945	0.594
2011	231	United States	417	Peas, green	0.110934	12.3137	27.6226	22
2011	41	China	417	Peas, green	0.0640661	0.83286	24.6014	1.508
2011	229	United Kingdom	417	Peas, green	2.03044	18.2739	416.24	5.868
2011	97	Hungary	417	Peas, green	3.25507	65.1014	1015.58	4.007
2011	79	Germany	417	Peas, green	43.5835	87.167	11593.2	3.061
2011	170	Peru	417	Peas, green	0.959654	299.412	773.481	7.61
2011	114	Kenya	417	Peas, green	3.33774	53.4038	1782.35	1.018
2011	223	Turkey	417	Peas, green	0.0141602	2.02491	4.10646	1.801
2011	143	Morocco	417	Peas, green	0.020176	1.47284	6.90018	0.939
2011	130	Malawi	417	Peas, green	0.116593	0	0	1.342
2011	106	Italy	417	Peas, green	33.5157	3217.5	12836.5	2.273
2011	210	Sweden	417	Peas, green	75.8372	455.023	33671.7	20.223
2011	89	Guatemala	417	Peas, green	2.70366	8.11098	1427.53	4.459
2011	222	Tunisia	417	Peas, green	0.0494515	0.445064	15.0333	0.869
2011	174	Portugal	417	Peas, green	0.0569599	9.2275	15.0944	2.74
2011	167	Czech Republic	417	Peas, green	0.346377	4.15652	228.262	3.932
2011	126	Lithuania	417	Peas, green	0.0550238	0.0550238	8.63874	8.15
2011	150	Netherlands	417	Peas, green	19.3819	232.583	3256.16	3.277
2011	185	Russia	417	Peas, green	0.576302	13.2549	350.392	12.681
2011	198	Slovenia	426	Carrots and turnips	0.0696262	0.0696262	6.61449	4.224
2011	174	Portugal	426	Carrots and turnips	7.24174	514.164	622.79	2.74
2011	126	Lithuania	426	Carrots and turnips	0.149378	0	13.2946	8.15
2011	33	Canada	426	Carrots and turnips	0.259146	0	14.253	110.909
2011	84	Greece	426	Carrots and turnips	0.0194891	2.16329	1.36423	4.259
2011	105	Israel	426	Carrots and turnips	85.7472	6345.29	2143.68	0.486
2011	199	Slovak Republic	426	Carrots and turnips	0.137477	2.06215	16.6347	3.987
2011	48	Costa Rica	426	Carrots and turnips	0.12568	0	0	4.51
2011	79	Germany	426	Carrots and turnips	187.304	2809.56	12362.1	3.061
2011	173	Poland	426	Carrots and turnips	0.995309	0	54.742	3.103
2011	272	Serbia	426	Carrots and turnips	0.0267591	NA	NA	4.37
2011	183	Romania	426	Carrots and turnips	0.120994	0	12.5834	4.002
2011	104	Ireland	426	Carrots and turnips	0.0228496	0.0228496	1.78227	19.74
2011	202	South Africa	426	Carrots and turnips	0.426746	38.8339	54.6235	2.449
2011	223	Turkey	426	Carrots and turnips	0.037389	0.261723	5.23446	1.801
2011	162	Norway	426	Carrots and turnips	0.016856	0	0.573105	55.393
2011	255	Belgium	426	Carrots and turnips	114.817	344.451	6314.94	2.037
2011	150	Netherlands	426	Carrots and turnips	2524.4	7573.19	143891	3.277
2011	3	Albania	426	Carrots and turnips	0.0169879	1.56289	2.87096	4.4
2011	10	Australia	426	Carrots and turnips	0.172472	27.2506	14.8326	53.268
2011	222	Tunisia	426	Carrots and turnips	0.0141528	7.48685	3.67974	0.869
2011	54	Denmark	426	Carrots and turnips	62.7319	501.855	3826.65	7.856
2011	210	Sweden	426	Carrots and turnips	49.0516	0	1030.08	20.223
2011	138	Mexico	426	Carrots and turnips	0.225171	11.0334	13.0599	4.236
2011	203	Spain	426	Carrots and turnips	710.477	64653.5	39786.7	2.701
2011	167	Czech Republic	426	Carrots and turnips	0.117504	2.35008	16.5681	3.932
2011	63	Estonia	426	Carrots and turnips	84.2136	0	5642.31	8.345
2011	143	Morocco	426	Carrots and turnips	0.2906	58.7012	22.9574	0.939
2011	97	Hungary	426	Carrots and turnips	10.4265	62.5592	740.283	4.007
2011	41	China	426	Carrots and turnips	0.492638	1.47791	70.9399	1.508
2011	11	Austria	426	Carrots and turnips	2.32704	74.4654	153.585	2.873
2011	211	Switzerland	426	Carrots and turnips	0.0152423	0	0.685902	1.642
2011	119	Latvia	426	Carrots and turnips	1.04626	0	104.626	8.345
2011	231	United States	426	Carrots and turnips	4.35537	87.1074	283.099	22
2011	68	France	426	Carrots and turnips	117.838	2710.28	8602.19	5.064
2011	229	United Kingdom	426	Carrots and turnips	3.1147	0	84.0969	5.868
2011	106	Italy	426	Carrots and turnips	879.85	28155.2	62469.3	2.273
2011	185	Russia	44	Barley	1371.65	71325.8	3.02449e+06	12.681
2011	256	Luxembourg	44	Barley	16.5183	0	5368.44	1.954
2011	146	Moldova	44	Barley	14.8643	74.3217	15503.5	4.089
2011	230	Ukraine	44	Barley	85.8336	1630.84	120510	4.3
2011	21	Brazil	44	Barley	0.944784	0	1767.69	16.749
2011	54	Denmark	44	Barley	10389.8	0	4.58192e+06	7.856
2011	57	Belarus	44	Barley	39.9786	119.936	55610.2	5.092
2011	272	Serbia	44	Barley	0.657937	NA	NA	4.37
2011	202	South Africa	44	Barley	0.0140308	3.00258	17.1877	2.449
2011	234	Uruguay	44	Barley	1.55329	0	2854.95	14.962
2011	63	Estonia	44	Barley	2592.08	0	3.97365e+06	8.345
2011	102	Iran	44	Barley	2.61618	NA	NA	0.976
2011	143	Morocco	44	Barley	0.0241923	0	89.3178	0.939
2011	150	Netherlands	44	Barley	416.172	0	151070	3.277
2011	156	New Zealand	44	Barley	47.8994	0	31326.2	58.852
2011	1	Armenia	44	Barley	0.0403008	13.8232	77.9418	1.896
2011	210	Sweden	44	Barley	4957.11	0	2.66197e+06	20.223
2011	59	Egypt	44	Barley	0.0445473	75.5076	27.5748	1.681
2011	33	Canada	44	Barley	105.902	847.218	94147.1	110.909
2011	229	United Kingdom	44	Barley	1487.52	0	502781	5.868
2011	100	India	44	Barley	0.284956	222.551	355.055	0.881
2011	104	Ireland	44	Barley	1045.45	0	300044	19.74
2011	134	Malta	44	Barley	0.0188395	0	13.8094	NA
2011	170	Peru	44	Barley	0.0316643	35.939	110.794	7.61
2011	41	China	44	Barley	3.76489	105.417	2093.28	1.508
2011	203	Spain	44	Barley	1025.16	86113.6	1.02824e+06	2.701
2011	105	Israel	44	Barley	0.0424322	0	128.697	0.486
2011	216	Thailand	44	Barley	1.23668	0	2532.73	3.613
2011	255	Belgium	44	Barley	265.304	0	63407.6	2.037
2011	174	Portugal	44	Barley	1.58093	0	4036.11	2.74
2011	167	Czech Republic	44	Barley	958.033	0	629427	3.932
2011	108	Kazakhstan	44	Barley	0.586995	95.0932	1664.13	11.614
2011	11	Austria	44	Barley	411.959	0	164784	2.873
2011	138	Mexico	44	Barley	37.8592	32710.3	39297.8	4.236
2011	80	Bosnia and Herzegovina	44	Barley	0.952071	0	735.951	4.4
2011	126	Lithuania	44	Barley	698.44	0	910766	8.15
2011	98	Croatia	44	Barley	2.19577	0	1374.55	4.398
2011	154	NA	44	Barley	0.549386	NA	NA	NA
2011	121	Lebanon	44	Barley	0.0420249	0	80.6878	0.544
2011	112	Jordan	44	Barley	0.0262111	8.38756	83.0368	0.108
2011	183	Romania	44	Barley	35.1904	0	27202.2	4.002
2011	79	Germany	44	Barley	10675.9	0	5.33796e+06	3.061
2011	222	Tunisia	44	Barley	0.315382	23.6536	1123.07	0.869
2011	198	Slovenia	44	Barley	11.6581	0	11261.7	4.224
2011	4	Algeria	44	Barley	0.137786	0	393.931	0.85
2011	194	Saudi Arabia	44	Barley	0.0750475	60.038	14.5592	0.479
2011	199	Slovak Republic	44	Barley	99.9281	599.568	101427	3.987
2011	117	South Korea	44	Barley	0.0106338	NA	NA	1.14
2011	9	Argentina	44	Barley	68.0925	680.925	98461.8	13.678
2011	40	Chile	44	Barley	0.288158	60.8013	189.031	21.914
2011	223	Turkey	44	Barley	9.65248	164.092	13841.7	1.801
2011	68	France	44	Barley	4548.53	18194.1	2.41982e+06	5.064
2011	27	Bulgaria	44	Barley	74.0878	0	57566.2	4.006
2011	84	Greece	44	Barley	24.3707	0	25564.9	4.259
2011	52	Azerbaijan	44	Barley	0.0935394	41.8121	102.613	1.916
2011	97	Hungary	44	Barley	175.954	175.954	103989	4.007
2011	231	United States	44	Barley	159.379	35222.8	147585	22
2011	50	Cyprus	44	Barley	22.8544	731.341	37069.9	NA
2011	106	Italy	44	Barley	93.7582	0	67505.9	2.273
2011	211	Switzerland	44	Barley	21.72	0	8188.44	1.642
2011	141	Mongolia	44	Barley	0.0175951	0	20.8502	8.853
2011	173	Poland	44	Barley	2019.46	0	2.10226e+06	3.103
2011	119	Latvia	44	Barley	310.748	0	480106	8.345
2011	10	Australia	44	Barley	77.7122	0	127370	53.268
2011	162	Norway	44	Barley	26.1156	0	8853.19	55.393
[truncated: 1,954 more rows]

## Sheet: 2010
Year	CountryCode	CountryName	ProductCode	ProductName	Imports	BlueWaterImports	GreenWaterImports	GBScarcity
2010	11	Austria	103	Grain, mixed	1.78579	64.2884	2001.87	2.873
2010	255	Belgium	103	Grain, mixed	1.89753	47.4382	1593.92	2.037
2010	54	Denmark	103	Grain, mixed	0.160161	0	0	7.856
2010	33	Canada	103	Grain, mixed	0.0842474	1.93769	112.639	110.909
2010	84	Greece	103	Grain, mixed	0.0191481	28.7222	22.882	4.259
2010	229	United Kingdom	103	Grain, mixed	26.0284	598.652	21239.1	5.868
2010	126	Lithuania	103	Grain, mixed	6.3487	63.487	14265.5	8.15
2010	210	Sweden	103	Grain, mixed	0.131053	1.17948	141.407	20.223
2010	63	Estonia	103	Grain, mixed	3.00745	6.01491	6469.03	8.345
2010	68	France	103	Grain, mixed	222.831	24734.3	212804	5.064
2010	211	Switzerland	103	Grain, mixed	0.117204	0.351613	94.2323	1.642
2010	203	Spain	103	Grain, mixed	1.81587	3758.85	3384.78	2.701
2010	198	Slovenia	103	Grain, mixed	0.0175444	0	5.35106	4.224
2010	223	Turkey	103	Grain, mixed	0.382315	391.108	843.386	1.801
2010	119	Latvia	103	Grain, mixed	198.66	198.66	354013	8.345
2010	173	Poland	103	Grain, mixed	1.05156	1.05156	1804.47	3.103
2010	79	Germany	103	Grain, mixed	94.3198	471.599	86679.9	3.061
2010	256	Luxembourg	103	Grain, mixed	1.99157	0	1145.15	1.954
2010	167	Czech Republic	103	Grain, mixed	2.49671	87.385	5759.92	3.932
2010	170	Peru	108	Cereals, nes	0.0597654	70.3439	114.391	7.61
2010	126	Lithuania	108	Cereals, nes	66.7918	267.167	127506	8.15
2010	198	Slovenia	108	Cereals, nes	3.75431	18.7715	3420.17	4.224
2010	27	Bulgaria	108	Cereals, nes	0.481081	44.7406	957.352	4.006
2010	167	Czech Republic	108	Cereals, nes	144.942	1159.54	130158	3.932
2010	156	New Zealand	108	Cereals, nes	0.512329	0	181.877	58.852
2010	173	Poland	108	Cereals, nes	15585.9	0	1.92018e+07	3.103
2010	106	Italy	108	Cereals, nes	61.5747	5664.87	38792	2.273
2010	84	Greece	108	Cereals, nes	1.24171	0	0	4.259
2010	108	Kazakhstan	108	Cereals, nes	0.217734	609.654	360.567	11.614
2010	9	Argentina	108	Cereals, nes	6.73331	1070.6	11985.3	13.678
2010	230	Ukraine	108	Cereals, nes	0.112497	4.04988	217.906	4.3
2010	138	Mexico	108	Cereals, nes	0.0646014	0	0	4.236
2010	199	Slovak Republic	108	Cereals, nes	7.8392	627.136	12644.6	3.987
2010	185	Russia	108	Cereals, nes	0.353064	38.837	1728.95	12.681
2010	256	Luxembourg	108	Cereals, nes	30.2793	0	12232.8	1.954
2010	222	Tunisia	108	Cereals, nes	0.466338	1247.92	889.307	0.869
2010	20	Botswana	108	Cereals, nes	0.0502443	1.05513	59.8912	7.297
2010	104	Ireland	108	Cereals, nes	24.7471	0	0	19.74
2010	97	Hungary	108	Cereals, nes	46.8591	2858.4	98450.9	4.007
2010	272	Serbia	108	Cereals, nes	0.919663	NA	NA	4.37
2010	143	Morocco	108	Cereals, nes	0.0185256	75.3435	37.5143	0.939
2010	216	Thailand	108	Cereals, nes	49.1515	2506.72	106511	3.613
2010	57	Belarus	108	Cereals, nes	22.4192	22.4192	48335.8	5.092
2010	211	Switzerland	108	Cereals, nes	2.74694	0	0	1.642
2010	202	South Africa	108	Cereals, nes	0.0388577	50.0098	58.4419	2.449
2010	183	Romania	108	Cereals, nes	0.616493	20.9608	818.703	4.002
2010	41	China	108	Cereals, nes	0.413668	7.44603	513.362	1.508
2010	11	Austria	108	Cereals, nes	7170	7170	1.44117e+06	2.873
2010	154	NA	116	Potatoes	0.282467	NA	NA	NA
2010	234	Uruguay	116	Potatoes	3.16163	126.465	733.498	14.962
2010	202	South Africa	116	Potatoes	0.381147	25.918	34.3033	2.449
2010	97	Hungary	116	Potatoes	4.82859	38.6287	777.403	4.007
2010	150	Netherlands	116	Potatoes	21912.7	65738.2	1.66537e+06	3.277
2010	63	Estonia	116	Potatoes	555.353	0	109960	8.345
2010	105	Israel	116	Potatoes	186.717	19231.9	8215.57	0.486
2010	4	Algeria	116	Potatoes	0.018235	3.71994	1.13057	0.85
2010	171	Philippines	116	Potatoes	0.0101316	0	3.73856	3.939
2010	231	United States	116	Potatoes	344.157	30630	16863.7	22
2010	119	Latvia	116	Potatoes	241.303	0	53086.7	8.345
2010	211	Switzerland	116	Potatoes	16.1921	0	1586.83	1.642
2010	167	Czech Republic	116	Potatoes	5.25402	10.508	767.086	3.932
2010	80	Bosnia and Herzegovina	116	Potatoes	0.0935114	0.748092	43.6698	4.4
2010	11	Austria	116	Potatoes	41.8832	628.248	4774.69	2.873
2010	54	Denmark	116	Potatoes	4831.35	77301.6	367183	7.856
2010	216	Thailand	116	Potatoes	0.0320567	0	12.2136	3.613
2010	27	Bulgaria	116	Potatoes	1.24657	17.452	365.245	4.006
2010	174	Portugal	116	Potatoes	20.2242	3943.72	4166.18	2.74
2010	59	Egypt	116	Potatoes	64.3018	18583.2	1350.34	1.681
2010	112	Jordan	116	Potatoes	0.0421871	5.99057	1.09687	0.108
2010	9	Argentina	116	Potatoes	0.339894	17.3346	49.2846	13.678
2010	126	Lithuania	116	Potatoes	430.542	0	90844.4	8.15
2010	21	Brazil	116	Potatoes	0.0126531	0.291021	2.74572	16.749
2010	146	Moldova	116	Potatoes	0.0416242	8.7827	17.0243	4.089
2010	98	Croatia	116	Potatoes	0.071804	0.287216	30.8757	4.398
2010	33	Canada	116	Potatoes	42.1071	0	5768.67	110.909
2010	194	Saudi Arabia	116	Potatoes	0.0512887	13.5915	0.718042	0.479
2010	41	China	116	Potatoes	2.68274	18.7792	576.79	1.508
2010	237	Vietnam	116	Potatoes	0.393338	0	189.589	3.809
2010	183	Romania	116	Potatoes	2.45972	14.7583	654.285	4.002
2010	113	Kyrgyz Republic	116	Potatoes	0.0359407	0.646933	3.05496	1.352
2010	230	Ukraine	116	Potatoes	3.05937	12.2375	1021.83	4.3
2010	185	Russia	116	Potatoes	55.2721	110.544	16471.1	12.681
2010	156	New Zealand	116	Potatoes	5.36646	0	429.317	58.852
2010	57	Belarus	116	Potatoes	21.0936	21.0936	4640.6	5.092
2010	173	Poland	116	Potatoes	3442.72	3442.72	661002	3.103
2010	124	Libya	116	Potatoes	0.0624986	8.24982	3.87491	1.143
2010	138	Mexico	116	Potatoes	0.0738183	8.26765	10.1869	4.236
2010	143	Morocco	116	Potatoes	25.7247	823.189	3447.1	0.939
2010	162	Norway	116	Potatoes	2.01332	30.1998	255.691	55.393
2010	52	Azerbaijan	116	Potatoes	0.154299	51.2273	16.6643	1.916
2010	222	Tunisia	116	Potatoes	3.81102	464.944	434.456	0.869
2010	3	Albania	116	Potatoes	0.0793169	4.91765	11.5803	4.4
2010	198	Slovenia	116	Potatoes	5.49369	10.9874	1126.21	4.224
2010	255	Belgium	116	Potatoes	7258.97	0	580718	2.037
2010	10	Australia	116	Potatoes	1.48174	146.692	75.5687	53.268
2010	40	Chile	116	Potatoes	0.520237	54.6249	46.3011	21.914
2010	223	Turkey	116	Potatoes	1.86564	141.789	106.342	1.801
2010	84	Greece	116	Potatoes	16.8447	1617.1	1448.65	4.259
2010	106	Italy	116	Potatoes	395.03	18171.4	50958.9	2.273
2010	256	Luxembourg	116	Potatoes	4.46622	0	527.014	1.954
2010	44	Colombia	116	Potatoes	0.0380207	0	9.27704	9.648
2010	108	Kazakhstan	116	Potatoes	0.0277136	2.99307	3.57505	11.614
2010	165	Pakistan	116	Potatoes	0.285	37.05	15.105	0.594
2010	79	Germany	116	Potatoes	5366.42	42931.3	450779	3.061
2010	170	Peru	116	Potatoes	0.118987	19.7518	11.8987	7.61
2010	117	South Korea	116	Potatoes	0.0980058	NA	NA	1.14
2010	121	Lebanon	116	Potatoes	0.138583	41.5749	3.32599	0.544
2010	100	India	116	Potatoes	0.142589	5.1332	31.5121	0.881
2010	229	United Kingdom	116	Potatoes	206.054	2678.7	13599.5	5.868
2010	272	Serbia	116	Potatoes	0.577962	NA	NA	4.37
2010	134	Malta	116	Potatoes	5.92387	710.865	390.976	NA
2010	50	Cyprus	116	Potatoes	37.9556	2163.47	2543.03	NA
2010	199	Slovak Republic	116	Potatoes	0.510453	6.12543	124.04	3.987
2010	102	Iran	116	Potatoes	0.0302143	NA	NA	0.976
2010	203	Spain	116	Potatoes	502.22	38670.9	45199.8	2.701
2010	104	Ireland	116	Potatoes	24.4021	24.4021	2391.41	19.74
2010	68	France	116	Potatoes	2631.9	42110.4	207920	5.064
2010	210	Sweden	116	Potatoes	5883.67	52953	576600	20.223
2010	214	Taiwan	122	Sweet potatoes	0.0466203	NA	NA	2
2010	41	China	122	Sweet potatoes	337.318	1349.27	81630.9	1.508
2010	138	Mexico	122	Sweet potatoes	0.243783	11.214	56.5576	4.236
2010	9	Argentina	122	Sweet potatoes	0.14033	5.61321	55.2902	13.678
2010	234	Uruguay	122	Sweet potatoes	12.5017	212.528	7038.43	14.962
2010	131	Malaysia	122	Sweet potatoes	0.140996	0.281992	64.2942	25.815
2010	170	Peru	122	Sweet potatoes	10.3501	486.456	2214.93	7.61
2010	117	South Korea	122	Sweet potatoes	0.675402	NA	NA	1.14
2010	171	Philippines	122	Sweet potatoes	0.0512368	0.0512368	52.6714	3.939
2010	237	Vietnam	122	Sweet potatoes	7.55805	7.55805	5184.82	3.809
2010	158	Niger	122	Sweet potatoes	0.210827	9.69802	71.0485	1.614
2010	159	Nigeria	122	Sweet potatoes	0.0772712	0.0772712	99.448	2.328
2010	101	Indonesia	122	Sweet potatoes	0.150767	2.56304	85.0328	16.287
2010	84	Greece	122	Sweet potatoes	0.0927412	10.8507	11.4072	4.259
2010	202	South Africa	122	Sweet potatoes	73.075	51006.3	87105.4	2.449
2010	203	Spain	122	Sweet potatoes	7.375	1165.25	1386.5	2.701
2010	169	Paraguay	122	Sweet potatoes	0.582191	0	551.335	15.566
2010	95	Honduras	122	Sweet potatoes	17.0346	68.1384	12299	4.51
2010	106	Italy	122	Sweet potatoes	5.70966	228.386	1621.54	2.273
2010	81	Ghana	122	Sweet potatoes	1.54102	1.54102	3883.36	2.981
2010	48	Costa Rica	122	Sweet potatoes	1.73019	0	0	4.51
2010	10	Australia	122	Sweet potatoes	0.793903	24.611	192.918	53.268
2010	109	Jamaica	122	Sweet potatoes	1.14056	3.42168	330.763	1.94
2010	58	Ecuador	122	Sweet potatoes	0.357692	98.3654	550.131	2.575
2010	32	Cameroon	122	Sweet potatoes	2.17919	4.35839	1924.23	4.848
2010	29	Burundi	122	Sweet potatoes	0.0606697	0	39.4353	0.42
2010	91	Guyana	122	Sweet potatoes	0.0436856	0	106.418	127.073
2010	120	Lao	122	Sweet potatoes	0.0174376	NA	NA	8.865
2010	105	Israel	122	Sweet potatoes	165.131	31044.6	8751.92	0.486
2010	100	India	122	Sweet potatoes	0.0182831	0.219397	10.7322	0.881
2010	59	Egypt	122	Sweet potatoes	123.997	15127.6	7687.79	1.681
2010	231	United States	122	Sweet potatoes	587.639	33495.4	123404	22
2010	174	Portugal	122	Sweet potatoes	16.716	3109.18	7154.46	2.74
2010	207	Suriname	122	Sweet potatoes	0.171378	0	53.6413	121.744
2010	38	Sri Lanka	122	Sweet potatoes	0.0459144	10.8358	29.2475	2.1
2010	21	Brazil	122	Sweet potatoes	132.834	929.84	56720.3	16.749
2010	56	Dominican Republic	122	Sweet potatoes	3.8223	49.6899	3378.91	1.03
2010	226	Uganda	122	Sweet potatoes	4.37832	0	3476.39	1.578
2010	129	Madagascar	122	Sweet potatoes	0.0747115	0.0747115	86.1424	5.758
2010	115	Cambodia	125	Cassava	20.4138	0	12942.4	9.505
2010	41	China	125	Cassava	2.13399	0	706.349	1.508
2010	101	Indonesia	125	Cassava	0.494417	0	207.655	16.287
2010	38	Sri Lanka	125	Cassava	2.20187	0	1739.48	2.1
2010	32	Cameroon	125	Cassava	1.16944	0	741.427	4.848
2010	95	Honduras	125	Cassava	0.125495	0	195.898	4.51
2010	21	Brazil	125	Cassava	981.479	981.479	424980	16.749
2010	197	Sierra Leone	125	Cassava	0.0847418	0	139.739	2.658
2010	138	Mexico	125	Cassava	0.138906	0	75.8426	4.236
2010	159	Nigeria	125	Cassava	0.0328754	0	17.0624	2.328
2010	171	Philippines	125	Cassava	0.314654	0	280.042	3.939
2010	157	Nicaragua	125	Cassava	0.173068	0	123.398	4.51
2010	81	Ghana	125	Cassava	11.8155	0	6380.38	2.981
2010	226	Uganda	125	Cassava	0.01002	0	4.60919	1.578
2010	236	Venezuela	125	Cassava	0.169851	NA	NA	17.1
2010	58	Ecuador	125	Cassava	2.46457	0	1855.82	2.575
2010	100	India	125	Cassava	1.42261	0	367.033	0.881
2010	44	Colombia	125	Cassava	0.240362	0	143.977	9.648
2010	169	Paraguay	125	Cassava	35.5573	0	18987.6	15.566
2010	9	Argentina	125	Cassava	4.30856	0	10512.9	13.678
2010	237	Vietnam	125	Cassava	101.363	0	57169	3.809
2010	48	Costa Rica	125	Cassava	99.7896	0	52090.2	4.51
2010	89	Guatemala	125	Cassava	0.0143219	0	40.5453	4.459
2010	216	Thailand	125	Cassava	1145.56	0	498317	3.613
2010	166	Panama	125	Cassava	0.0399896	0	23.9938	4.505
2010	66	Fiji	125	Cassava	0.235692	NA	NA	NA
2010	217	Togo	125	Cassava	0.467055	0	347.489	1.598
2010	107	Cote d'Ivoire	125	Cassava	2.5093	NA	NA	2.937
2010	120	Lao	125	Cassava	0.445555	NA	NA	8.865
2010	207	Suriname	125	Cassava	0.411343	0	131.63	121.744
2010	21	Brazil	137	Yams	4.24774	29.7342	1932.72	16.749
2010	101	Indonesia	149	Roots and tubers, nes	0.266744	9.60279	138.707	16.287
2010	157	Nicaragua	149	Roots and tubers, nes	0.293908	0.587816	202.503	4.51
2010	110	Japan	149	Roots and tubers, nes	0.0565004	0.0565004	9.20956	3.555
2010	171	Philippines	149	Roots and tubers, nes	0.0485258	0.0970517	28.8244	3.939
2010	44	Colombia	149	Roots and tubers, nes	0.108521	0.976687	26.9131	9.648
2010	66	Fiji	149	Roots and tubers, nes	6.46739	NA	NA	NA
2010	63	Estonia	149	Roots and tubers, nes	6.38644	0	510.915	8.345
2010	48	Costa Rica	149	Roots and tubers, nes	6.64102	19.9231	2257.95	4.51
2010	143	Morocco	149	Roots and tubers, nes	0.0437158	1.79235	8.96174	0.939
2010	165	Pakistan	149	Roots and tubers, nes	0.166699	10.6687	4.83427	0.594
2010	81	Ghana	149	Roots and tubers, nes	13.4644	13.4644	5978.2	2.981
2010	198	Slovenia	149	Roots and tubers, nes	5.44897	0	0	4.224
2010	244	Samoa	149	Roots and tubers, nes	0.0688403	0	25.6774	NA
2010	217	Togo	149	Roots and tubers, nes	0.462517	0	198.42	1.598
2010	107	Cote d'Ivoire	149	Roots and tubers, nes	0.925678	NA	NA	2.937
2010	236	Venezuela	149	Roots and tubers, nes	0.0522921	NA	NA	17.1
2010	215	Tanzania	149	Roots and tubers, nes	0.0105048	NA	NA	2.006
2010	109	Jamaica	149	Roots and tubers, nes	0.235719	0.707158	38.4222	1.94
2010	207	Suriname	149	Roots and tubers, nes	0.297896	0	118.265	121.744
2010	41	China	149	Roots and tubers, nes	9.38937	56.3362	1671.31	1.508
2010	58	Ecuador	149	Roots and tubers, nes	0.0120086	4.179	9.37874	2.575
2010	170	Peru	149	Roots and tubers, nes	8.85893	1187.1	3897.93	7.61
2010	216	Thailand	149	Roots and tubers, nes	5.15938	51.5938	1336.28	3.613
2010	130	Malawi	149	Roots and tubers, nes	0.0169324	0	0	1.342
2010	59	Egypt	149	Roots and tubers, nes	0.0378315	23.9852	4.01014	1.681
2010	138	Mexico	149	Roots and tubers, nes	0.0699966	1.81991	6.36969	4.236
2010	166	Panama	149	Roots and tubers, nes	0.06505	0	8.65164	4.505
2010	19	Bolivia	149	Roots and tubers, nes	0.764781	39.7686	629.415	11.75
2010	32	Cameroon	149	Roots and tubers, nes	1.74328	1.74328	964.032	4.848
2010	203	Spain	149	Roots and tubers, nes	2.17818	174.254	176.432	2.701
2010	103	Iraq	15	Wheat	0.0154579	43.916	40.7935	0.675
2010	3	Albania	15	Wheat	0.0381438	0.534013	42.3396	4.4
2010	100	India	15	Wheat	69.5976	81498.8	44124.9	0.881
2010	54	Denmark	15	Wheat	24642.7	147856	1.30606e+07	7.856
2010	19	Bolivia	15	Wheat	0.162738	0	894.082	11.75
2010	156	New Zealand	15	Wheat	70.6738	0	50814.5	58.852
2010	110	Japan	15	Wheat	1.13855	5.69277	1227.36	3.555
2010	214	Taiwan	15	Wheat	0.010658	NA	NA	2
2010	134	Malta	15	Wheat	0.541426	0	492.156	NA
2010	194	Saudi Arabia	15	Wheat	1.42137	1553.56	338.286	0.479
2010	44	Colombia	15	Wheat	0.011133	0	24.6819	9.648
2010	170	Peru	15	Wheat	0.0500048	0	175.067	7.61
2010	10	Australia	15	Wheat	498.063	7969.01	995130	53.268
2010	238	Ethiopia	15	Wheat	1.87844	NA	NA	0.815
2010	222	Tunisia	15	Wheat	5.25535	378.385	12481.5	0.869
2010	234	Uruguay	15	Wheat	13.8123	13.8123	26174.3	14.962
2010	97	Hungary	15	Wheat	1700.53	3401.07	1.5934e+06	4.007
2010	223	Turkey	15	Wheat	377.263	49044.2	782444	1.801
2010	255	Belgium	15	Wheat	3603.33	0	1.45214e+06	2.037
2010	68	France	15	Wheat	36737.5	36737.5	2.13445e+07	5.064
2010	33	Canada	15	Wheat	1547.72	7738.61	2.06776e+06	110.909
2010	167	Czech Republic	15	Wheat	3881.74	0	2.78709e+06	3.932
2010	251	Zambia	15	Wheat	0.217421	152.847	39.788	5.161
2010	102	Iran	15	Wheat	2.54173	NA	NA	0.976
2010	63	Estonia	15	Wheat	16537.3	0	2.84441e+07	8.345
2010	146	Moldova	15	Wheat	59.1954	3314.94	108564	4.089
2010	183	Romania	15	Wheat	608.678	27390.5	1.01406e+06	4.002
2010	119	Latvia	15	Wheat	4637.96	0	6.40038e+06	8.345
2010	235	Uzbekistan	15	Wheat	0.0200139	1.90133	17.6723	1.147
2010	150	Netherlands	15	Wheat	3905.14	0	1.99553e+06	3.277
2010	4	Algeria	15	Wheat	0.0196879	1.27972	64.7733	0.85
2010	174	Portugal	15	Wheat	17.7132	3206.09	60277.9	2.74
2010	199	Slovak Republic	15	Wheat	794.461	3177.84	740437	3.987
2010	173	Poland	15	Wheat	11792	0	1.3148e+07	3.103
2010	250	Congo, Dem. Rep.	15	Wheat	0.0467654	NA	NA	7.345
2010	103	Iraq	15	Wheat	0.0154579	43.916	40.7935	0.675
2010	143	Morocco	15	Wheat	0.469207	114.956	1294.07	0.939
2010	106	Italy	15	Wheat	4242.6	67881.7	5.04021e+06	2.273
2010	117	South Korea	15	Wheat	0.126952	NA	NA	1.14
2010	212	Syria	15	Wheat	1.14076	501.935	1658.67	0.976
2010	230	Ukraine	15	Wheat	210.628	4001.94	363334	4.3
2010	121	Lebanon	15	Wheat	1.05581	102.414	1642.85	0.544
2010	98	Croatia	15	Wheat	74.8899	0	94885.5	4.398
2010	114	Kenya	15	Wheat	0.149767	0	223.452	1.018
2010	16	Bangladesh	15	Wheat	0.341662	115.482	349.178	2.294
2010	113	Kyrgyz Republic	15	Wheat	1.55312	972.255	2318.81	1.352
2010	105	Israel	15	Wheat	1.50144	36.0346	3162.03	0.486
2010	103	Iraq	15	Wheat	0.0154579	43.916	40.7935	0.675
2010	41	China	15	Wheat	564.551	263081	463496	1.508
2010	84	Greece	15	Wheat	257.604	7470.52	382800	4.259
2010	165	Pakistan	15	Wheat	12.4322	18262.9	7956.59	0.594
2010	162	Norway	15	Wheat	450.253	0	312026	55.393
2010	210	Sweden	15	Wheat	26103.4	0	1.21903e+07	20.223
2010	52	Azerbaijan	15	Wheat	0.0479721	7.24379	46.437	1.916
2010	203	Spain	15	Wheat	2340.7	112353	3.26293e+06	2.701
2010	50	Cyprus	15	Wheat	1.81862	256.425	2991.63	NA
2010	108	Kazakhstan	15	Wheat	1655.96	39742.9	5.59713e+06	11.614
2010	141	Mongolia	15	Wheat	0.075676	0	98.6814	8.853
2010	215	Tanzania	15	Wheat	0.0268425	NA	NA	2.006
2010	57	Belarus	15	Wheat	44.255	0	53858.3	5.092
2010	21	Brazil	15	Wheat	19.6842	19.6842	39151.9	16.749
2010	185	Russia	15	Wheat	2483.79	74513.8	5.70776e+06	12.681
2010	256	Luxembourg	15	Wheat	152.639	0	113258	1.954
2010	202	South Africa	15	Wheat	0.558897	128.546	581.253	2.449
2010	59	Egypt	15	Wheat	0.714519	645.925	153.622	1.681
2010	138	Mexico	15	Wheat	74.5089	41576	24811.5	4.236
2010	27	Bulgaria	15	Wheat	555.044	0	816470	4.006
2010	216	Thailand	15	Wheat	0.205418	0	857.416	3.613
2010	40	Chile	15	Wheat	3.56322	758.966	3634.48	21.914
2010	11	Austria	15	Wheat	1011.98	0	694217	2.873
2010	229	United Kingdom	15	Wheat	9025.66	0	3.71857e+06	5.868
2010	80	Bosnia and Herzegovina	15	Wheat	4.69246	0	8000.65	4.4
2010	149	Nepal	15	Wheat	0.104791	195.33	135.704	0.716
2010	272	Serbia	15	Wheat	53.0645	NA	NA	4.37
2010	169	Paraguay	15	Wheat	8.7327	0	17736.1	15.566
2010	211	Switzerland	15	Wheat	304.551	0	211663	1.642
2010	79	Germany	15	Wheat	53590	0	3.21004e+07	3.061
2010	103	Iraq	15	Wheat	0.0154579	43.916	40.7935	0.675
2010	9	Argentina	15	Wheat	24.6991	271.69	43717.4	13.678
2010	198	Slovenia	15	Wheat	16.532	16.532	18631.6	4.224
2010	104	Ireland	15	Wheat	871.036	0	358867	19.74
2010	231	United States	15	Wheat	1416.74	130340	2.64789e+06	22
2010	126	Lithuania	15	Wheat	4097.65	0	5.15075e+06	8.15
2010	154	NA	15	Wheat	1.72525	NA	NA	NA
2010	101	Indonesia	161	Sugar crops, nes	80.6521	0	207921	16.287
2010	101	Indonesia	162	Sugar Raw Centrifugal	32.3921	745.018	2639.95	16.287
2010	9	Argentina	162	Sugar Raw Centrifugal	740.57	9997.7	32955.4	13.678
2010	28	Myanmar	162	Sugar Raw Centrifugal	0.0450417	0.112604	5.51761	9.429
2010	206	NA	162	Sugar Raw Centrifugal	20.8789	2348.87	323.622	NA
2010	126	Lithuania	162	Sugar Raw Centrifugal	3376.81	0	170529	8.15
2010	68	France	162	Sugar Raw Centrifugal	8657.93	4328.97	186146	5.064
2010	181	Zimbabwe	162	Sugar Raw Centrifugal	101.156	3945.08	2073.7	1.66
2010	110	Japan	162	Sugar Raw Centrifugal	24.1968	60.4921	2697.95	3.555
2010	212	Syria	162	Sugar Raw Centrifugal	12.9425	420.63	867.146	0.976
2010	10	Australia	162	Sugar Raw Centrifugal	99.4241	2634.74	3628.98	53.268
2010	38	Sri Lanka	162	Sugar Raw Centrifugal	0.0224105	1.38945	2.17382	2.1
2010	138	Mexico	162	Sugar Raw Centrifugal	185.211	3055.99	14631.7	4.236
2010	229	United Kingdom	162	Sugar Raw Centrifugal	1863.08	931.542	61481.8	5.868
2010	170	Peru	162	Sugar Raw Centrifugal	31.7479	968.311	761.95	7.61
2010	197	Sierra Leone	162	Sugar Raw Centrifugal	4.56344	73.0151	246.426	2.658
2010	250	Congo, Dem. Rep.	162	Sugar Raw Centrifugal	0.0364773	NA	NA	7.345
2010	48	Costa Rica	162	Sugar Raw Centrifugal	190.362	2284.35	13325.4	4.51
2010	114	Kenya	162	Sugar Raw Centrifugal	4.06997	4.06997	193.323	1.018
2010	113	Kyrgyz Republic	162	Sugar Raw Centrifugal	0.0373406	0.896174	1.54963	1.352
2010	234	Uruguay	162	Sugar Raw Centrifugal	2.08921	1.0446	194.296	14.962
2010	255	Belgium	162	Sugar Raw Centrifugal	1499.35	0	38233.5	2.037
2010	56	Dominican Republic	162	Sugar Raw Centrifugal	28.9496	1447.48	3879.25	1.03
2010	41	China	162	Sugar Raw Centrifugal	167.13	501.391	26490.2	1.508
2010	14	Barbados	162	Sugar Raw Centrifugal	21.5711	0	2577.75	NA
2010	106	Italy	162	Sugar Raw Centrifugal	264.713	1588.28	11912.1	2.273
2010	32	Cameroon	162	Sugar Raw Centrifugal	0.0794278	0	45.949	4.848
2010	216	Thailand	162	Sugar Raw Centrifugal	234.976	5051.99	24555	3.613
2010	102	Iran	162	Sugar Raw Centrifugal	1.05673	NA	NA	0.976
2010	183	Romania	162	Sugar Raw Centrifugal	5.27446	7.91169	524.809	4.002
2010	21	Brazil	162	Sugar Raw Centrifugal	28825.5	72063.7	1.75835e+06	16.749
2010	149	Nepal	162	Sugar Raw Centrifugal	0.0285073	1.04052	4.29035	0.716
2010	100	India	162	Sugar Raw Centrifugal	290.199	20459	17702.2	0.881
2010	58	Ecuador	162	Sugar Raw Centrifugal	10.8472	401.347	3221.63	2.575
2010	209	Swaziland	162	Sugar Raw Centrifugal	757.391	24993.9	20828.2	1.163
2010	215	Tanzania	162	Sugar Raw Centrifugal	31.7916	NA	NA	2.006
2010	95	Honduras	162	Sugar Raw Centrifugal	150.962	528.368	11246.7	4.51
2010	173	Poland	162	Sugar Raw Centrifugal	7405.97	3702.98	340674	3.103
2010	144	Mozambique	162	Sugar Raw Centrifugal	146.024	10002.7	33439.6	3.451
2010	44	Colombia	162	Sugar Raw Centrifugal	170.374	681.498	10648.4	9.648
2010	1	Armenia	162	Sugar Raw Centrifugal	0.408992	0	32.9239	1.896
2010	185	Russia	162	Sugar Raw Centrifugal	3608.67	23456.3	297715	12.681
2010	46	Congo, Rep.	162	Sugar Raw Centrifugal	0.130366	2.47696	507.516	12.17
2010	195	Senegal	162	Sugar Raw Centrifugal	0.0642461	1.92738	1.2528	1.544
2010	211	Switzerland	162	Sugar Raw Centrifugal	157.051	0	4004.8	1.642
2010	97	Hungary	162	Sugar Raw Centrifugal	81.1128	40.5564	3852.86	4.007
2010	166	Panama	162	Sugar Raw Centrifugal	5.08981	43.2634	554.789	4.505
2010	115	Cambodia	162	Sugar Raw Centrifugal	2.21388	163.827	638.705	9.505
2010	231	United States	162	Sugar Raw Centrifugal	699.769	22042.7	85022	22
2010	23	Belize	162	Sugar Raw Centrifugal	201.986	201.986	25046.3	5.148
2010	169	Paraguay	162	Sugar Raw Centrifugal	133.41	1534.22	14875.3	15.566
2010	109	Jamaica	162	Sugar Raw Centrifugal	84.8174	1145.03	8778.6	1.94
2010	19	Bolivia	162	Sugar Raw Centrifugal	81.9098	368.594	6184.19	11.75
2010	251	Zambia	162	Sugar Raw Centrifugal	183.498	8349.14	3394.7	5.161
2010	53	Benin	162	Sugar Raw Centrifugal	1.65337	62.828	211.631	2.331
2010	171	Philippines	162	Sugar Raw Centrifugal	13.8035	117.33	1118.08	3.939
2010	91	Guyana	162	Sugar Raw Centrifugal	352.653	2292.25	29975.5	127.073
2010	107	Cote d'Ivoire	162	Sugar Raw Centrifugal	0.287674	NA	NA	2.937
2010	98	Croatia	162	Sugar Raw Centrifugal	87.4166	0	5026.45	4.398
2010	57	Belarus	162	Sugar Raw Centrifugal	1712.27	0	103592	5.092
2010	214	Taiwan	162	Sugar Raw Centrifugal	1.37681	NA	NA	2
2010	84	Greece	162	Sugar Raw Centrifugal	41.4999	1120.5	975.247	4.259
2010	59	Egypt	162	Sugar Raw Centrifugal	250.527	39082.2	3632.64	1.681
2010	158	Niger	162	Sugar Raw Centrifugal	3.78634	549.019	189.317	1.614
2010	199	Slovak Republic	162	Sugar Raw Centrifugal	227.257	1249.92	10226.6	3.987
2010	207	Suriname	162	Sugar Raw Centrifugal	0.227607	0	33.003	121.744
2010	238	Ethiopia	162	Sugar Raw Centrifugal	5.96461	NA	NA	0.815
2010	33	Canada	162	Sugar Raw Centrifugal	7.19894	0	287.958	110.909
2010	120	Lao	162	Sugar Raw Centrifugal	12.6302	NA	NA	8.865
2010	3	Albania	162	Sugar Raw Centrifugal	0.0113049	0.0395673	0.661339	4.4
2010	165	Pakistan	162	Sugar Raw Centrifugal	446.406	51559.9	44194.2	0.594
2010	230	Ukraine	162	Sugar Raw Centrifugal	487.053	730.579	44565.3	4.3
2010	52	Azerbaijan	162	Sugar Raw Centrifugal	2.87318	116.364	136.476	1.916
2010	60	El Salvador	162	Sugar Raw Centrifugal	121.521	303.802	8931.78	4.51
2010	108	Kazakhstan	162	Sugar Raw Centrifugal	0.440868	52.4632	26.6725	11.614
2010	11	Austria	162	Sugar Raw Centrifugal	684.809	1369.62	20544.3	2.873
2010	143	Morocco	162	Sugar Raw Centrifugal	17.6344	1992.69	758.279	0.939
2010	129	Madagascar	162	Sugar Raw Centrifugal	0.743506	14.1266	106.693	5.758
2010	237	Vietnam	162	Sugar Raw Centrifugal	32.773	557.141	3572.26	3.809
2010	79	Germany	162	Sugar Raw Centrifugal	30408.5	45612.7	912255	3.061
2010	130	Malawi	162	Sugar Raw Centrifugal	1038.35	35304	33227.3	1.342
2010	167	Czech Republic	162	Sugar Raw Centrifugal	621.465	0	25480	3.932
2010	131	Malaysia	162	Sugar Raw Centrifugal	0.433216	6.93145	42.6717	25.815
2010	223	Turkey	162	Sugar Raw Centrifugal	249.341	10971	6981.54	1.801
2010	66	Fiji	162	Sugar Raw Centrifugal	204.039	NA	NA	NA
2010	272	Serbia	162	Sugar Raw Centrifugal	232.54	NA	NA	4.37
2010	89	Guatemala	162	Sugar Raw Centrifugal	632.608	4111.95	40486.9	4.459
2010	210	Sweden	162	Sugar Raw Centrifugal	11317.1	16975.7	407417	20.223
2010	54	Denmark	162	Sugar Raw Centrifugal	5650.66	0	161044	7.856
2010	236	Venezuela	162	Sugar Raw Centrifugal	1.03573	NA	NA	17.1
2010	157	Nicaragua	162	Sugar Raw Centrifugal	121.607	972.856	8816.51	4.51
2010	150	Netherlands	162	Sugar Raw Centrifugal	5779.46	0	158935	3.277
2010	40	Chile	162	Sugar Raw Centrifugal	3.78467	136.248	73.8011	21.914
2010	137	Mauritius	162	Sugar Raw Centrifugal	627.918	1569.79	43954.2	NA
2010	49	Cuba	162	Sugar Raw Centrifugal	298.202	7455.06	53378.2	2.817
2010	146	Moldova	162	Sugar Raw Centrifugal	248.773	3109.67	20026.3	4.089
2010	202	South Africa	162	Sugar Raw Centrifugal	130.71	1829.94	7777.23	2.449
2010	154	NA	162	Sugar Raw Centrifugal	0.0266427	NA	NA	NA
2010	226	Uganda	162	Sugar Raw Centrifugal	1.07088	0	68.0009	1.578
2010	203	Spain	162	Sugar Raw Centrifugal	349.591	24821	18003.9	2.701
2010	120	Lao	176	Beans, dry	0.0311312	NA	NA	8.865
2010	40	Chile	176	Beans, dry	2.92523	76.0559	2501.07	21.914
2010	208	Tajikistan	176	Beans, dry	0.0340332	55.9506	26.8522	1.08
2010	57	Belarus	176	Beans, dry	1.34394	1.34394	1874.8	5.092
2010	114	Kenya	176	Beans, dry	0.054393	0	452.495	1.018
2010	21	Brazil	176	Beans, dry	0.288971	17.9162	797.848	16.749
2010	210	Sweden	176	Beans, dry	12.6856	0	16909.9	20.223
2010	84	Greece	176	Beans, dry	0.341704	102.853	248.077	4.259
2010	126	Lithuania	176	Beans, dry	13.8884	0	15416.2	8.15
2010	138	Mexico	176	Beans, dry	0.535661	93.2049	2340.3	4.236
2010	98	Croatia	176	Beans, dry	0.0239599	0	21.8275	4.398
2010	230	Ukraine	176	Beans, dry	0.080693	0	110.63	4.3
2010	19	Bolivia	176	Beans, dry	0.50832	0	737.572	11.75
2010	119	Latvia	176	Beans, dry	4.39121	0	4637.12	8.345
2010	169	Paraguay	176	Beans, dry	0.0123048	0	36.2746	15.566
2010	44	Colombia	176	Beans, dry	0.0108151	0	28.5411	9.648
2010	33	Canada	176	Beans, dry	30.787	0	34912.5	110.909
2010	100	India	176	Beans, dry	1.91496	319.798	16853.6	0.881
2010	129	Madagascar	176	Beans, dry	0.732461	0	1179.26	5.758
2010	157	Nicaragua	176	Beans, dry	0.0918105	25.0643	668.839	4.51
2010	174	Portugal	176	Beans, dry	0.177147	0	574.665	2.74
2010	38	Sri Lanka	176	Beans, dry	0.0452907	0	155.211	2.1
2010	72	Djibouti	176	Beans, dry	0.0723607	106.877	473.239	0.92
2010	237	Vietnam	176	Beans, dry	0.322739	0	1343.56	3.809
2010	56	Dominican Republic	176	Beans, dry	0.0101003	0	44.4111	1.03
2010	81	Ghana	176	Beans, dry	0.0303747	0	0	2.981
2010	63	Estonia	176	Beans, dry	7.43086	0	7453.15	8.345
2010	185	Russia	176	Beans, dry	0.0381581	1.48816	65.1358	12.681
2010	149	Nepal	176	Beans, dry	0.0169141	0	87.6658	0.716
2010	60	El Salvador	176	Beans, dry	0.0245967	0	101.978	4.51
2010	173	Poland	176	Beans, dry	0.693275	0	793.107	3.103
2010	255	Belgium	176	Beans, dry	0.237524	0	171.492	2.037
2010	214	Taiwan	176	Beans, dry	0.0893015	NA	NA	2
2010	198	Slovenia	176	Beans, dry	0.0301436	0	36.534	4.224
2010	115	Cambodia	176	Beans, dry	0.031224	0	145.16	9.505
2010	216	Thailand	176	Beans, dry	4.32821	0	18053	3.613
2010	68	France	176	Beans, dry	0.808742	30.7322	696.327	5.064
2010	256	Luxembourg	176	Beans, dry	0.0185735	0	12.5186	1.954
2010	59	Egypt	176	Beans, dry	1.3434	2541.71	423.17	1.681
2010	101	Indonesia	176	Beans, dry	0.111661	11.7244	373.952	16.287
2010	165	Pakistan	176	Beans, dry	0.0303628	39.0162	141.278	0.594
2010	9	Argentina	176	Beans, dry	16.4785	477.875	18241.7	13.678
2010	27	Bulgaria	176	Beans, dry	0.0190923	0	62.1072	4.006
2010	121	Lebanon	176	Beans, dry	0.168038	0	73.7687	0.544
2010	158	Niger	176	Beans, dry	0.105033	0	523.798	1.614
2010	58	Ecuador	176	Beans, dry	0.097195	54.1376	407.053	2.575
2010	144	Mozambique	176	Beans, dry	0.0162803	0	0	3.451
2010	41	China	176	Beans, dry	82.8536	0	157090	1.508
2010	238	Ethiopia	176	Beans, dry	12.3189	NA	NA	0.815
2010	226	Uganda	176	Beans, dry	0.225916	0	1274.62	1.578
2010	150	Netherlands	176	Beans, dry	17.9427	0	11034.7	3.277
2010	23	Belize	176	Beans, dry	0.096264	0	379.28	5.148
2010	116	North Korea	176	Beans, dry	0.0215529	NA	NA	1.141
2010	10	Australia	176	Beans, dry	3.03646	0	10345.2	53.268
2010	231	United States	176	Beans, dry	26.5466	11361.9	32280.6	22
2010	106	Italy	176	Beans, dry	1.09003	0	1389.78	2.273
2010	203	Spain	176	Beans, dry	2.52251	542.339	4936.55	2.701
2010	102	Iran	176	Beans, dry	0.102513	NA	NA	0.976
2010	199	Slovak Republic	176	Beans, dry	0.0187251	0	30.9339	3.987
2010	104	Ireland	176	Beans, dry	10.7038	0	3906.9	19.74
2010	223	Turkey	176	Beans, dry	16.5996	2805.34	16350.6	1.801
2010	113	Kyrgyz Republic	176	Beans, dry	4.84069	464.707	4269.49	1.352
2010	170	Peru	176	Beans, dry	5.07157	4468.05	8297.08	7.61
2010	28	Myanmar	176	Beans, dry	12.6979	0	45775.8	9.429
2010	212	Syria	176	Beans, dry	0.0354551	4.00642	20.9185	0.976
2010	215	Tanzania	176	Beans, dry	4.41842	NA	NA	2.006
2010	97	Hungary	176	Beans, dry	0.0359553	3.91912	66.4813	4.007
2010	223	Turkey	181	Broad beans, horse beans, dry	0.0743341	7.13607	58.2036	1.801
2010	10	Australia	181	Broad beans, horse beans, dry	0.230239	0	265.696	53.268
2010	11	Austria	181	Broad beans, horse beans, dry	0.0164922	0	13.2597	2.873
2010	126	Lithuania	181	Broad beans, horse beans, dry	1.56343	0	0	8.15
2010	121	Lebanon	181	Broad beans, horse beans, dry	0.0154753	0	6.66985	0.544
2010	68	France	181	Broad beans, horse beans, dry	0.275139	7.70388	122.162	5.064
2010	199	Slovak Republic	181	Broad beans, horse beans, dry	0.0647702	0	85.2376	3.987
2010	235	Uzbekistan	181	Broad beans, horse beans, dry	2	3290	1490	1.147
2010	255	Belgium	181	Broad beans, horse beans, dry	0.0203588	0	0	2.037
2010	143	Morocco	181	Broad beans, horse beans, dry	0.0157557	7.84636	33.8906	0.939
2010	229	United Kingdom	181	Broad beans, horse beans, dry	1.60022	0	1169.76	5.868
2010	167	Czech Republic	181	Broad beans, horse beans, dry	0.0457304	0	56.7514	3.932
2010	41	China	181	Broad beans, horse beans, dry	1.16736	0	1476.71	1.508
2010	106	Italy	181	Broad beans, horse beans, dry	0.193135	0	223.264	2.273
2010	150	Netherlands	181	Broad beans, horse beans, dry	0.565598	0	159.499	3.277
2010	173	Poland	181	Broad beans, horse beans, dry	0.0368395	0	0	3.103
2010	170	Peru	181	Broad beans, horse beans, dry	0.182823	153.754	218.839	7.61
2010	79	Germany	181	Broad beans, horse beans, dry	75.4983	0	37975.7	3.061
2010	59	Egypt	181	Broad beans, horse beans, dry	0.0386212	59.7083	9.38494	1.681
2010	203	Spain	181	Broad beans, horse beans, dry	0.377163	54.3114	661.921	2.701
2010	121	Lebanon	187	Peas, dry	0.0147803	0	8.63171	0.544
2010	185	Russia	187	Peas, dry	33.5835	1880.68	56118.1	12.681
2010	28	Myanmar	187	Peas, dry	0.651915	0	2733.48	9.429
2010	146	Moldova	187	Peas, dry	0.277566	17.7642	537.923	4.089
2010	79	Germany	187	Peas, dry	219.156	0	161080	3.061
2010	167	Czech Republic	187	Peas, dry	31.4161	0	32829.8	3.932
2010	255	Belgium	187	Peas, dry	6.15515	0	3256.07	2.037
2010	130	Malawi	187	Peas, dry	9.6057	0	16310.5	1.342
2010	100	India	187	Peas, dry	9.87572	829.56	39759.6	0.881
2010	33	Canada	187	Peas, dry	48.959	0	58701.8	110.909
2010	104	Ireland	187	Peas, dry	1.22239	0	585.527	19.74
2010	170	Peru	187	Peas, dry	0.13465	111.49	193.626	7.61
2010	203	Spain	187	Peas, dry	15.0618	1400.75	27548.1	2.701
2010	27	Bulgaria	187	Peas, dry	0.0733411	0	98.7905	4.006
2010	97	Hungary	187	Peas, dry	21.1031	1624.93	23930.9	4.007
2010	54	Denmark	187	Peas, dry	163.69	0	92648.6	7.856
2010	215	Tanzania	187	Peas, dry	0.152202	NA	NA	2.006
2010	173	Poland	187	Peas, dry	1.04858	0	1177.55	3.103
2010	229	United Kingdom	187	Peas, dry	240.235	0	139336	5.868
2010	119	Latvia	187	Peas, dry	2.87858	0	3966.68	8.345
2010	183	Romania	187	Peas, dry	2.99466	0	4471.02	4.002
2010	41	China	187	Peas, dry	0.892238	0	1805	1.508
2010	23	Belize	187	Peas, dry	0.0276643	0	63.7938	5.148
2010	210	Sweden	187	Peas, dry	274.148	0	217125	20.223
2010	40	Chile	187	Peas, dry	0.169763	11.5439	251.079	21.914
2010	129	Madagascar	187	Peas, dry	0.410451	0	199.479	5.758
2010	230	Ukraine	187	Peas, dry	55.6301	0	88118.1	4.3
2010	106	Italy	187	Peas, dry	3.52142	0	2894.61	2.273
2010	162	Norway	187	Peas, dry	0.27026	0	0	55.393
2010	11	Austria	187	Peas, dry	14.1852	0	11575.1	2.873
2010	199	Slovak Republic	187	Peas, dry	5.58598	0	6915.44	3.987
2010	256	Luxembourg	187	Peas, dry	0.253966	0	191.998	1.954
2010	57	Belarus	187	Peas, dry	0.371655	0.371655	521.432	5.092
2010	9	Argentina	187	Peas, dry	3.42973	78.8838	4390.05	13.678
2010	68	France	187	Peas, dry	598.576	15563	292105	5.064
2010	231	United States	187	Peas, dry	54.3469	2608.65	57444.6	22
2010	126	Lithuania	187	Peas, dry	44.4456	0	64623.9	8.15
2010	150	Netherlands	187	Peas, dry	11.8822	0	6036.17	3.277
2010	156	New Zealand	187	Peas, dry	112.904	0	51709.9	58.852
2010	198	Slovenia	187	Peas, dry	0.123556	0	95.8792	4.224
2010	272	Serbia	187	Peas, dry	0.0481668	NA	NA	4.37
2010	63	Estonia	187	Peas, dry	64.1127	0	94886.8	8.345
2010	211	Switzerland	187	Peas, dry	1.44705	0	952.158	1.642
2010	10	Australia	187	Peas, dry	8.94364	0	13290.3	53.268
2010	223	Turkey	187	Peas, dry	0.049066	4.31781	42.7365	1.801
2010	158	Niger	191	Chick peas	0.0827898	0	336.458	1.614
2010	100	India	191	Chick peas	4.05531	348.757	12887.8	0.881
2010	106	Italy	191	Chick peas	1.31631	0	2348.29	2.273
2010	33	Canada	191	Chick peas	6.55779	0	11279.4	110.909
2010	9	Argentina	191	Chick peas	0.939004	12.2071	1039.48	13.678
2010	59	Egypt	191	Chick peas	0.186166	229.542	100.343	1.681
2010	143	Morocco	191	Chick peas	1.67857	295.429	5143.15	0.939
2010	138	Mexico	191	Chick peas	18.469	886.511	24175.9	4.236
2010	238	Ethiopia	191	Chick peas	0.341001	NA	NA	0.815
2010	41	China	191	Chick peas	0.32669	0	201.568	1.508
2010	174	Portugal	191	Chick peas	0.0378245	0	126.41	2.74
2010	121	Lebanon	191	Chick peas	0.253615	0	255.897	0.544
2010	165	Pakistan	191	Chick peas	0.014077	7.62972	48.9878	0.594
2010	185	Russia	191	Chick peas	0.329848	15.173	671.9	12.681
2010	212	Syria	191	Chick peas	0.133162	9.32132	275.379	0.976
2010	102	Iran	191	Chick peas	0.177597	NA	NA	0.976
2010	215	Tanzania	191	Chick peas	0.136542	NA	NA	2.006
2010	203	Spain	191	Chick peas	12.0457	542.059	36498.6	2.701
2010	28	Myanmar	191	Chick peas	0.0116768	0	30.6049	9.429
2010	231	United States	191	Chick peas	9.88944	0	17979	22
2010	10	Australia	191	Chick peas	3.16238	0	3839.12	53.268
2010	223	Turkey	191	Chick peas	22.8272	2419.69	49192.7	1.801
2010	68	France	201	Lentils	0.922996	144.91	2057.36	5.064
2010	238	Ethiopia	201	Lentils	0.940026	NA	NA	0.815
2010	10	Australia	201	Lentils	1.12022	0	2863.28	53.268
2010	9	Argentina	201	Lentils	0.0133346	0.440042	25.0291	13.678
2010	84	Greece	201	Lentils	0.0120475	7.8068	18.9628	4.259
2010	59	Egypt	201	Lentils	0.0191221	89.3578	12.6397	1.681
2010	33	Canada	201	Lentils	63.0508	0	152015	110.909
2010	149	Nepal	201	Lentils	0.122991	0	780.006	0.716
2010	102	Iran	201	Lentils	0.0288043	NA	NA	0.976
2010	41	China	201	Lentils	6.40754	0	19985.1	1.508
2010	28	Myanmar	201	Lentils	0.398589	0.398589	4533.16	9.429
2010	130	Malawi	201	Lentils	0.126863	0	201.586	1.342
2010	223	Turkey	201	Lentils	54.7201	20410.6	88810.7	1.801
2010	121	Lebanon	201	Lentils	0.222984	0	221.423	0.544
2010	203	Spain	201	Lentils	3.1623	1388.25	13465.1	2.701
2010	231	United States	201	Lentils	12.9419	0	23062.5	22
2010	212	Syria	201	Lentils	0.232703	67.9494	368.137	0.976
2010	106	Italy	201	Lentils	0.294879	0	1363.22	2.273
2010	100	India	201	Lentils	0.228732	77.3112	1754.6	0.881
2010	170	Peru	211	Pulses, nes	0.0307493	8.3638	80.8091	7.61
2010	158	Niger	211	Pulses, nes	0.285052	0	272.224	1.614
2010	154	NA	211	Pulses, nes	0.0297402	NA	NA	NA
2010	11	Austria	211	Pulses, nes	32.602	0	44469.1	2.873
2010	63	Estonia	211	Pulses, nes	0.452175	0	0	8.345
2010	256	Luxembourg	211	Pulses, nes	0.0141466	0.0141466	15.5188	1.954
2010	54	Denmark	211	Pulses, nes	36.6502	0	21477	7.856
2010	79	Germany	211	Pulses, nes	52.9724	0	63037.2	3.061
2010	198	Slovenia	211	Pulses, nes	0.0349321	0	41.3247	4.224
2010	68	France	211	Pulses, nes	56.2225	2192.68	32271.7	5.064
2010	167	Czech Republic	211	Pulses, nes	5.91109	0	9788.77	3.932
2010	222	Tunisia	211	Pulses, nes	0.0186911	0.803719	31.7189	0.869
2010	27	Bulgaria	211	Pulses, nes	0.0445653	0	0	4.006
2010	84	Greece	211	Pulses, nes	1.01549	353.391	1300.84	4.259
2010	203	Spain	211	Pulses, nes	57.2276	13047.9	198580	2.701
2010	59	Egypt	211	Pulses, nes	0.0444034	111.719	21.3581	1.681
2010	230	Ukraine	211	Pulses, nes	0.112219	0	221.745	4.3
2010	199	Slovak Republic	211	Pulses, nes	0.57759	0	828.842	3.987
2010	126	Lithuania	211	Pulses, nes	69.7307	0	84304.4	8.15
2010	185	Russia	211	Pulses, nes	0.407735	45.6664	1137.17	12.681
2010	41	China	211	Pulses, nes	0.991158	0	1457.99	1.508
2010	143	Morocco	211	Pulses, nes	0.0453453	20.4961	108.738	0.939
2010	223	Turkey	211	Pulses, nes	0.378601	97.3006	774.24	1.801
2010	229	United Kingdom	211	Pulses, nes	142.84	0	81561.7	5.868
2010	106	Italy	211	Pulses, nes	3.98909	0	0	2.273
2010	173	Poland	211	Pulses, nes	584.597	0	621427	3.103
2010	100	India	211	Pulses, nes	1.78721	614.799	3740.62	0.881
2010	19	Bolivia	216	Brazil nuts, with shell	124.794	0	0	11.75
2010	170	Peru	216	Brazil nuts, with shell	1.66731	0	43353.5	7.61
2010	21	Brazil	216	Brazil nuts, with shell	1.52848	0	0	16.749
2010	107	Cote d'Ivoire	217	Cashew nuts, with shell	55.1726	NA	NA	2.937
2010	21	Brazil	217	Cashew nuts, with shell	42.104	209931	1.15967e+06	16.749
2010	216	Thailand	217	Cashew nuts, with shell	1.02173	857.229	9664.51	3.613
2010	38	Sri Lanka	217	Cashew nuts, with shell	0.639809	0	26463.1	2.1
2010	60	El Salvador	217	Cashew nuts, with shell	0.0628538	0	698.242	4.51
2010	159	Nigeria	217	Cashew nuts, with shell	2.11847	99.5679	9975.85	2.328
2010	53	Benin	217	Cashew nuts, with shell	15.63	78.1498	582654	2.331
2010	144	Mozambique	217	Cashew nuts, with shell	11.2952	0	60553.8	3.451
2010	90	Guinea	217	Cashew nuts, with shell	1.12618	46.1734	10104.1	2.492
2010	195	Senegal	217	Cashew nuts, with shell	3.36484	10289.7	55072.4	1.544
2010	129	Madagascar	217	Cashew nuts, with shell	0.86247	0	16652.6	5.758
2010	233	Burkina Faso	217	Cashew nuts, with shell	1.48192	1357.44	23916.6	0.973
2010	237	Vietnam	217	Cashew nuts, with shell	273.048	14198.5	1.20441e+06	3.809
2010	215	Tanzania	217	Cashew nuts, with shell	24.7075	NA	NA	2.006
2010	95	Honduras	217	Cashew nuts, with shell	0.0632298	23.6479	397.463	4.51
2010	175	Guinea-Bissau	217	Cashew nuts, with shell	7.67561	NA	NA	5.398
2010	101	Indonesia	217	Cashew nuts, with shell	12.5218	0	780206	16.287
2010	75	Gambia	217	Cashew nuts, with shell	0.504043	0	0	2.186
2010	114	Kenya	217	Cashew nuts, with shell	0.581286	11.6257	656.853	1.018
2010	138	Mexico	217	Cashew nuts, with shell	0.0178812	58.5787	112.276	4.236
2010	171	Philippines	217	Cashew nuts, with shell	0.127552	0	808.804	3.939
2010	81	Ghana	217	Cashew nuts, with shell	6.6684	0	149019	2.981
2010	100	India	217	Cashew nuts, with shell	89.9828	188874	1.03678e+06	0.881
2010	133	Mali	217	Cashew nuts, with shell	0.178042	0	0	3.605
2010	174	Portugal	220	Chestnut	0.191493	123.513	1178.83	2.74
2010	41	China	220	Chestnut	5.78189	312.222	7718.82	1.508
2010	68	France	220	Chestnut	0.880216	538.692	2932	5.064
2010	203	Spain	220	Chestnut	0.567151	695.895	2043.45	2.701
2010	223	Turkey	220	Chestnut	0.162044	127.366	612.525	1.801
2010	84	Greece	220	Chestnut	0.0351805	28.0036	92.5598	4.259
2010	117	South Korea	220	Chestnut	0.0420018	NA	NA	1.14
2010	27	Bulgaria	220	Chestnut	0.0129396	0.595223	12.3574	4.006
2010	80	Bosnia and Herzegovina	220	Chestnut	0.0341524	0	0	4.4
2010	106	Italy	220	Chestnut	0.598489	300.442	1532.73	2.273
2010	19	Bolivia	220	Chestnut	0.660796	90.529	4064.55	11.75
2010	212	Syria	221	Almonds, with shell	0.430251	206.09	363.993	0.976
2010	174	Portugal	221	Almonds, with shell	0.539174	621.128	6938.09	2.74
2010	102	Iran	221	Almonds, with shell	0.100001	NA	NA	0.976
2010	231	United States	221	Almonds, with shell	383.328	781223	448877	22
2010	203	Spain	221	Almonds, with shell	118.629	118629	1.55155e+06	2.701
2010	165	Pakistan	221	Almonds, with shell	0.138968	162.315	176.073	0.594
2010	4	Algeria	221	Almonds, with shell	0.0133687	23.9567	64.7178	0.85
2010	40	Chile	221	Almonds, with shell	0.39624	693.816	1756.14	21.914
2010	222	Tunisia	221	Almonds, with shell	0.0262534	51.1941	466.339	0.869
2010	143	Morocco	221	Almonds, with shell	1.92531	2495.2	16446	0.939
2010	2	Afghanistan	221	Almonds, with shell	0.0265713	135.7	53.0097	0.853
2010	223	Turkey	221	Almonds, with shell	0.108957	40.3141	217.696	1.801
2010	10	Australia	221	Almonds, with shell	4.30333	5770.76	10521.6	53.268
2010	68	France	221	Almonds, with shell	0.0479618	10.7434	76.595	5.064
2010	235	Uzbekistan	221	Almonds, with shell	0.0179474	49.3912	31.5874	1.147
2010	41	China	221	Almonds, with shell	0.0660598	6.80416	207.428	1.508
2010	106	Italy	221	Almonds, with shell	180.474	135897	829096	2.273
2010	84	Greece	221	Almonds, with shell	0.414005	354.802	1156.31	4.259
2010	199	Slovak Republic	222	Walnuts, with shell	0.0781923	14.622	428.728	3.987
2010	68	France	222	Walnuts, with shell	19.0421	11292	61410.7	5.064
2010	73	Georgia	222	Walnuts, with shell	0.0137409	5.16658	51.3909	2.01
2010	84	Greece	222	Walnuts, with shell	0.123703	80.6545	266.952	4.259
2010	255	Belgium	222	Walnuts, with shell	0.0436145	0.436145	108.862	2.037
2010	231	United States	222	Walnuts, with shell	65.0334	128701	89355.8	22
2010	27	Bulgaria	222	Walnuts, with shell	0.253682	19.5335	1899.32	4.006
2010	167	Czech Republic	222	Walnuts, with shell	0.132948	13.4277	473.293	3.932
2010	97	Hungary	222	Walnuts, with shell	1.56884	178.848	7560.25	4.007
2010	10	Australia	222	Walnuts, with shell	0.0102108	0	0	53.268
2010	223	Turkey	222	Walnuts, with shell	0.235911	133.526	642.387	1.801
2010	9	Argentina	222	Walnuts, with shell	0.231656	209.185	703.308	13.678
2010	106	Italy	222	Walnuts, with shell	3.13523	1113.01	5677.9	2.273
2010	203	Spain	222	Walnuts, with shell	0.580606	451.712	1326.1	2.701
2010	146	Moldova	222	Walnuts, with shell	4.98353	303.995	10794.3	4.089
2010	41	China	222	Walnuts, with shell	1.64841	268.691	6603.54	1.508
2010	183	Romania	222	Walnuts, with shell	1.87938	5.63814	691.611	4.002
2010	165	Pakistan	222	Walnuts, with shell	0.213378	110.317	104.342	0.594
2010	79	Germany	222	Walnuts, with shell	16.3035	146.731	28319.2	3.061
2010	138	Mexico	222	Walnuts, with shell	1.93935	5949.92	11263.7	4.236
2010	173	Poland	222	Walnuts, with shell	9.30523	9.30523	21885.9	3.103
2010	198	Slovenia	222	Walnuts, with shell	0.0137513	0.0962594	2.80527	4.224
2010	100	India	222	Walnuts, with shell	7.25952	11404.7	64878.4	0.881
2010	230	Ukraine	222	Walnuts, with shell	5.72291	0	7325.33	4.3
2010	21	Brazil	222	Walnuts, with shell	0.0443416	5.14362	327.906	16.749
2010	235	Uzbekistan	222	Walnuts, with shell	0.0372591	71.6865	42.4754	1.147
2010	272	Serbia	222	Walnuts, with shell	0.0447744	NA	NA	4.37
2010	40	Chile	222	Walnuts, with shell	14.0151	45619.1	61736.4	21.914
2010	11	Austria	222	Walnuts, with shell	1.07612	109.764	2479.39	2.873
2010	41	China	223	Pistachios	1.2996	236.527	4236.69	1.508
2010	102	Iran	223	Pistachios	57.9739	NA	NA	0.976
2010	2	Afghanistan	223	Pistachios	5.17285	51252.6	14675.4	0.853
2010	212	Syria	223	Pistachios	0.95521	1703.14	2035.55	0.976
2010	231	United States	223	Pistachios	227.212	490324	216079	22
2010	84	Greece	223	Pistachios	0.146215	125.014	309.684	4.259
2010	222	Tunisia	223	Pistachios	0.299192	3596.89	24193.6	0.869
2010	223	Turkey	223	Pistachios	0.755993	562.458	2106.95	1.801
2010	106	Italy	223	Pistachios	0.167277	263.127	1059.54	2.273
2010	231	United States	225	Hazelnuts, with shell	0.215301	547.294	384.742	22
2010	106	Italy	225	Hazelnuts, with shell	20.0335	15065.2	76888.5	2.273
2010	52	Azerbaijan	225	Hazelnuts, with shell	1.40564	3452.24	8348.07	1.916
2010	203	Spain	225	Hazelnuts, with shell	0.471802	1011.07	2968.58	2.701
2010	73	Georgia	225	Hazelnuts, with shell	7.8108	3093.08	30782.4	2.01
2010	68	France	225	Hazelnuts, with shell	1.91521	1072.52	5837.55	5.064
2010	223	Turkey	225	Hazelnuts, with shell	81.677	63136.3	303757	1.801
2010	173	Poland	225	Hazelnuts, with shell	0.184578	0.369156	821.926	3.103
2010	57	Belarus	225	Hazelnuts, with shell	0.012718	0	40.5324	5.092
2010	237	Vietnam	234	Nuts, nes	2.00378	122.231	13521.5	3.809
2010	40	Chile	234	Nuts, nes	0.522229	0	0	21.914
2010	41	China	234	Nuts, nes	180.433	17682.4	433581	1.508
2010	185	Russia	234	Nuts, nes	45.0926	0	81572.5	12.681
2010	171	Philippines	234	Nuts, nes	14.8734	0	173722	3.939
2010	216	Thailand	234	Nuts, nes	75.1154	53632.4	732901	3.613
2010	143	Morocco	234	Nuts, nes	0.622529	0	0	0.939
2010	106	Italy	234	Nuts, nes	4.51956	3425.82	17499.7	2.273
2010	90	Guinea	234	Nuts, nes	0.15589	0	0	2.492
2010	102	Iran	234	Nuts, nes	6.7413	NA	NA	0.976
2010	215	Tanzania	234	Nuts, nes	1.75028	NA	NA	2.006
2010	53	Benin	234	Nuts, nes	0.25816	0	5764.7	2.331
2010	59	Egypt	234	Nuts, nes	0.857178	4294.46	865.75	1.681
2010	57	Belarus	234	Nuts, nes	3.98407	0	13494.1	5.092
2010	235	Uzbekistan	234	Nuts, nes	0.0307265	64.9557	38.5003	1.147
2010	202	South Africa	234	Nuts, nes	63.0303	127510	124485	2.449
2010	195	Senegal	234	Nuts, nes	0.130477	108.557	626.291	1.544
2010	114	Kenya	234	Nuts, nes	10.3777	342.464	20506.3	1.018
2010	159	Nigeria	234	Nuts, nes	0.356424	16.3955	1778.2	2.328
2010	141	Mongolia	234	Nuts, nes	0.118322	84.1273	243.626	8.853
2010	81	Ghana	234	Nuts, nes	0.239732	0	18184.9	2.981
2010	3	Albania	234	Nuts, nes	0.625852	1774.92	3404.01	4.4
2010	222	Tunisia	234	Nuts, nes	0.0301619	0	0	0.869
2010	52	Azerbaijan	234	Nuts, nes	5.4827	9517.97	23010.9	1.916
2010	73	Georgia	234	Nuts, nes	1.45779	752.222	7497.44	2.01
2010	130	Malawi	234	Nuts, nes	11.7427	20596.7	78229.9	1.342
2010	89	Guatemala	234	Nuts, nes	2.0948	31.422	4939.54	4.459
2010	48	Costa Rica	234	Nuts, nes	0.060183	64.2152	1140.05	4.51
2010	231	United States	234	Nuts, nes	190.612	454038	393805	22
2010	101	Indonesia	234	Nuts, nes	52.9531	0	1.8478e+06	16.287
2010	198	Slovenia	234	Nuts, nes	0.329994	3.62993	728.626	4.224
2010	10	Australia	234	Nuts, nes	50.7675	72800.6	93869.1	53.268
2010	165	Pakistan	234	Nuts, nes	15.6732	43634.3	41283.3	0.594
2010	138	Mexico	234	Nuts, nes	77.0101	186287	462600	4.236
2010	105	Israel	234	Nuts, nes	3.91877	21231.9	8895.6	0.486
2010	170	Peru	234	Nuts, nes	0.444318	920.183	1898.13	7.61
2010	2	Afghanistan	234	Nuts, nes	0.332931	3136.54	1051.4	0.853
2010	21	Brazil	234	Nuts, nes	7.62404	8988.74	105570	16.749
2010	181	Zimbabwe	234	Nuts, nes	2.70742	2504.37	17695.7	1.66
2010	230	Ukraine	234	Nuts, nes	0.0805768	0	449.861	4.3
2010	238	Ethiopia	234	Nuts, nes	0.244951	NA	NA	0.815
2010	133	Mali	234	Nuts, nes	0.0294517	57.961	280.204	3.605
2010	146	Moldova	234	Nuts, nes	1.00576	76.4376	2696.44	4.089
2010	107	Cote d'Ivoire	234	Nuts, nes	3.45198	NA	NA	2.937
2010	173	Poland	234	Nuts, nes	0.117045	0	0	3.103
2010	174	Portugal	234	Nuts, nes	110.605	81958.6	782644	2.74
2010	44	Colombia	234	Nuts, nes	1.70849	107.635	6613.55	9.648
2010	223	Turkey	234	Nuts, nes	1104.49	492601	2.36581e+06	1.801
2010	116	North Korea	234	Nuts, nes	4.12292	NA	NA	1.141
2010	121	Lebanon	234	Nuts, nes	106.709	154301	180231	0.544
2010	212	Syria	234	Nuts, nes	2.39764	1966.06	3258.39	0.976
2010	117	South Korea	234	Nuts, nes	0.480045	NA	NA	1.14
2010	203	Spain	234	Nuts, nes	27.1852	21394.8	62770.7	2.701
2010	113	Kyrgyz Republic	234	Nuts, nes	0.0513049	168.844	253.549	1.352
2010	27	Bulgaria	234	Nuts, nes	2.21576	70.9042	6824.53	4.006
2010	231	United States	236	Soybeans	17443.9	1.60484e+06	2.72125e+07	22
2010	84	Greece	236	Soybeans	0.489567	27.4157	612.937	4.259
2010	53	Benin	236	Soybeans	0.155364	0	494.522	2.331
2010	138	Mexico	236	Soybeans	0.217308	95.1809	679.957	4.236
2010	11	Austria	236	Soybeans	105.268	0	170639	2.873
2010	159	Nigeria	236	Soybeans	0.0276396	0	157.269	2.328
2010	21	Brazil	236	Soybeans	90761.4	90761.4	1.97951e+08	16.749
2010	115	Cambodia	236	Soybeans	19.5662	0	76288.7	9.505
2010	10	Australia	236	Soybeans	2.13682	0	4047.13	53.268
2010	149	Nepal	236	Soybeans	0.015842	0	111.575	0.716
2010	79	Germany	236	Soybeans	3.32584	0	6488.71	3.061
2010	237	Vietnam	236	Soybeans	0.159724	0	453.457	3.809
2010	100	India	236	Soybeans	161.053	3704.21	683185	0.881
2010	223	Turkey	236	Soybeans	0.844317	0	829.964	1.801
2010	27	Bulgaria	236	Soybeans	0.0631452	0.505162	309.538	4.006
2010	80	Bosnia and Herzegovina	236	Soybeans	0.132715	0	323.426	4.4
2010	19	Bolivia	236	Soybeans	4.98684	0	14985.4	11.75
2010	173	Poland	236	Soybeans	0.416436	0	1583.71	3.103
2010	98	Croatia	236	Soybeans	6.18211	0	11838.7	4.398
2010	185	Russia	236	Soybeans	97.0195	0	388757	12.681
2010	167	Czech Republic	236	Soybeans	8.828	0	21522.7	3.932
2010	102	Iran	236	Soybeans	0.0666481	NA	NA	0.976
2010	110	Japan	236	Soybeans	0.891881	0	2636.4	3.555
2010	9	Argentina	236	Soybeans	52617.3	263086	1.10181e+08	13.678
2010	169	Paraguay	236	Soybeans	7338.37	0	1.82872e+07	15.566
2010	211	Switzerland	236	Soybeans	0.860646	0	1205.77	1.642
2010	183	Romania	236	Soybeans	7.85305	5057.36	15682.5	4.002
2010	101	Indonesia	236	Soybeans	1.24963	262.422	4921.04	16.287
2010	198	Slovenia	236	Soybeans	0.0626929	0	121.624	4.224
2010	199	Slovak Republic	236	Soybeans	1.63695	247.18	4216.79	3.987
2010	68	France	236	Soybeans	70.5061	31516.2	105689	5.064
2010	108	Kazakhstan	236	Soybeans	14.2469	0	20772	11.614
2010	157	Nicaragua	236	Soybeans	0.0549019	0	76.7529	4.51
2010	217	Togo	236	Soybeans	0.149825	0	0	1.598
2010	272	Serbia	236	Soybeans	46.9449	NA	NA	4.37
2010	236	Venezuela	236	Soybeans	0.0621028	NA	NA	17.1
2010	230	Ukraine	236	Soybeans	126.691	0	368163	4.3
2010	41	China	236	Soybeans	81.291	20241.5	207211	1.508
2010	146	Moldova	236	Soybeans	4.4941	4.4941	13464.3	4.089
2010	216	Thailand	236	Soybeans	72.0677	0	184493	3.613
2010	106	Italy	236	Soybeans	238.925	31299.2	275480	2.273
2010	251	Zambia	236	Soybeans	4.93443	0	15829.6	5.161
2010	117	South Korea	236	Soybeans	0.107646	NA	NA	1.14
2010	97	Hungary	236	Soybeans	33.703	202.218	64103.1	4.007
2010	234	Uruguay	236	Soybeans	4705.08	28230.5	1.46422e+07	14.962
2010	33	Canada	236	Soybeans	10585.1	0	1.51684e+07	110.909
2010	59	Egypt	236	Soybeans	0.017654	27.3814	5.82582	1.681
2010	202	South Africa	236	Soybeans	3.98707	350.862	10920.6	2.449
2010	203	Spain	236	Soybeans	0.414016	1086.38	286.085	2.701
2010	226	Uganda	242	Groundnuts, with shell	0.0733883	0	389.986	1.578
2010	129	Madagascar	242	Groundnuts, with shell	0.0248636	0	150.052	5.758
2010	195	Senegal	242	Groundnuts, with shell	189.249	0	727474	1.544
2010	59	Egypt	242	Groundnuts, with shell	0.376546	697.74	97.5254	1.681
2010	169	Paraguay	242	Groundnuts, with shell	0.324784	0	1847.04	15.566
2010	214	Taiwan	242	Groundnuts, with shell	0.0998601	NA	NA	2
2010	130	Malawi	242	Groundnuts, with shell	3.50278	0	20253.1	1.342
2010	171	Philippines	242	Groundnuts, with shell	0.0294497	0	0	3.939
2010	84	Greece	242	Groundnuts, with shell	0.213024	0	132.501	4.259
2010	19	Bolivia	242	Groundnuts, with shell	1.18567	0	4726.07	11.75
2010	143	Morocco	242	Groundnuts, with shell	0.0250472	28.4036	20.2632	0.939
2010	121	Lebanon	242	Groundnuts, with shell	0.0192225	37.676	3.9406	0.544
2010	223	Turkey	242	Groundnuts, with shell	0.174669	217.463	106.897	1.801
2010	159	Nigeria	242	Groundnuts, with shell	0.124854	0	346.594	2.328
2010	231	United States	242	Groundnuts, with shell	572.875	144937	720104	22
2010	110	Japan	242	Groundnuts, with shell	0.0498474	0	0	3.555
2010	90	Guinea	242	Groundnuts, with shell	0.045277	0	191.024	2.492
2010	27	Bulgaria	242	Groundnuts, with shell	3.68585	0	15908.1	4.006
2010	174	Portugal	242	Groundnuts, with shell	0.0205837	0	22.848	2.74
2010	157	Nicaragua	242	Groundnuts, with shell	23.5992	0	22726.1	4.51
2010	175	Guinea-Bissau	242	Groundnuts, with shell	0.0238097	NA	NA	5.398
2010	215	Tanzania	242	Groundnuts, with shell	0.279573	NA	NA	2.006
2010	75	Gambia	242	Groundnuts, with shell	26.9811	0	98670	2.186
2010	203	Spain	242	Groundnuts, with shell	0.319833	0	259.705	2.701
2010	144	Mozambique	242	Groundnuts, with shell	0.454816	0	4867.44	3.451
2010	202	South Africa	242	Groundnuts, with shell	423.547	184243	936038	2.449
2010	10	Australia	242	Groundnuts, with shell	0.308998	226.186	524.987	53.268
2010	234	Uruguay	242	Groundnuts, with shell	0.29832	0	2235.31	14.962
2010	114	Kenya	242	Groundnuts, with shell	0.0387914	0	89.9185	1.018
2010	216	Thailand	242	Groundnuts, with shell	10.4373	0	31896.5	3.613
2010	206	NA	242	Groundnuts, with shell	0.0952655	37.5346	515.863	NA
2010	120	Lao	242	Groundnuts, with shell	0.543585	NA	NA	8.865
2010	107	Cote d'Ivoire	242	Groundnuts, with shell	0.0233527	NA	NA	2.937
2010	158	Niger	242	Groundnuts, with shell	0.0380889	17.4447	226.248	1.614
2010	20	Botswana	242	Groundnuts, with shell	0.940546	0	10976.2	7.297
2010	74	Gabon	242	Groundnuts, with shell	3.23563	653.598	9593.65	43.224
2010	81	Ghana	242	Groundnuts, with shell	0.596413	0	2583.66	2.981
2010	237	Vietnam	242	Groundnuts, with shell	2.02228	0	6083.01	3.809
2010	105	Israel	242	Groundnuts, with shell	0.26552	197.016	22.3037	0.486
2010	9	Argentina	242	Groundnuts, with shell	1511.74	68028.5	5.07493e+06	13.678
2010	233	Burkina Faso	242	Groundnuts, with shell	0.271119	0	1397.08	0.973
2010	41	China	242	Groundnuts, with shell	157.258	13366.9	217488	1.508
2010	100	India	242	Groundnuts, with shell	18.6654	6346.25	53588.5	0.881
2010	138	Mexico	242	Groundnuts, with shell	0.200183	0	583.134	4.236
2010	21	Brazil	242	Groundnuts, with shell	712.898	2138.69	1.97972e+06	16.749
2010	217	Togo	242	Groundnuts, with shell	13.3826	0	99285.2	1.598
2010	101	Indonesia	242	Groundnuts, with shell	1.71408	0	4449.76	16.287
2010	32	Cameroon	242	Groundnuts, with shell	0.0489195	0	318.417	4.848
2010	48	Costa Rica	249	Coconuts	0.903695	0	2308.04	4.51
2010	100	India	249	Coconuts	4.42103	0	10880.2	0.881
2010	41	China	249	Coconuts	0.0565083	0	44.6981	1.508
2010	138	Mexico	249	Coconuts	0.0300304	0	46.7574	4.236
2010	38	Sri Lanka	249	Coconuts	4.0527	0	11809.6	2.1
2010	66	Fiji	249	Coconuts	1.26096	NA	NA	NA
2010	244	Samoa	249	Coconuts	0.245774	0	501.133	NA
2010	101	Indonesia	249	Coconuts	2016.61	0	5.00725e+06	16.287
2010	144	Mozambique	249	Coconuts	0.0100094	0	16.7257	3.451
2010	237	Vietnam	249	Coconuts	1.02242	0	1845.46	3.809
2010	107	Cote d'Ivoire	249	Coconuts	3.99485	NA	NA	2.937
2010	83	Kiribati	249	Coconuts	0.0694815	0	189.407	NA
2010	171	Philippines	249	Coconuts	566.966	0	1.85001e+06	3.939
2010	195	Senegal	249	Coconuts	0.01137	0	23.0583	1.544
2010	115	Cambodia	249	Coconuts	0.297645	0	732.803	9.505
2010	216	Thailand	249	Coconuts	17.3931	0	42317.5	3.613
2010	168	Papua New Guinea	249	Coconuts	25.8121	0	91400.6	118.694
2010	114	Kenya	249	Coconuts	0.0299939	0	59.8078	1.018
2010	81	Ghana	249	Coconuts	0.524466	0	912.046	2.981
2010	70	French Polynesia	249	Coconuts	1.17885	0	3606.09	NA
2010	91	Guyana	249	Coconuts	0.0221962	0	54.4251	127.073
2010	21	Brazil	249	Coconuts	0.147181	3.38516	178.678	16.749
2010	56	Dominican Republic	249	Coconuts	0.124859	0	368.46	1.03
2010	131	Malaysia	249	Coconuts	127.617	0	533567	25.815
2010	41	China	254	Oil, palm fruit	0.0531159	0	25.2832	1.508
2010	32	Cameroon	254	Oil, palm fruit	0.0743843	0	38.0847	4.848
2010	48	Costa Rica	254	Oil, palm fruit	28.9988	0	21778.1	4.51
2010	159	Nigeria	254	Oil, palm fruit	20.9256	62.7767	78429	2.328
2010	131	Malaysia	254	Oil, palm fruit	74066.3	0	6.10307e+07	25.815
2010	169	Paraguay	254	Oil, palm fruit	0.901449	0	1240.39	15.566
2010	217	Togo	254	Oil, palm fruit	0.104031	0	111.938	1.598
2010	166	Panama	254	Oil, palm fruit	1.26235	0	1368.38	4.505
2010	175	Guinea-Bissau	254	Oil, palm fruit	0.0112467	NA	NA	5.398
2010	75	Gambia	254	Oil, palm fruit	0.0555591	0	39.0025	2.186
2010	90	Guinea	254	Oil, palm fruit	0.790676	4.74405	2896.24	2.492
2010	56	Dominican Republic	254	Oil, palm fruit	0.287446	0	210.985	1.03
2010	129	Madagascar	254	Oil, palm fruit	0.0118243	0	9.86151	5.758
2010	53	Benin	254	Oil, palm fruit	0.0259526	0	19.5682	2.331
2010	21	Brazil	254	Oil, palm fruit	24.5332	0	27599.8	16.749
2010	215	Tanzania	254	Oil, palm fruit	0.056426	NA	NA	2.006
2010	195	Senegal	254	Oil, palm fruit	0.814623	0	535.207	1.544
2010	101	Indonesia	254	Oil, palm fruit	31095.3	0	2.81101e+07	16.287
2010	197	Sierra Leone	254	Oil, palm fruit	0.0744204	0	94.8116	2.658
2010	89	Guatemala	254	Oil, palm fruit	4.0911	0	2311.47	4.459
2010	95	Honduras	254	Oil, palm fruit	52.3186	0	37564.8	4.51
2010	123	Liberia	254	Oil, palm fruit	0.16521	0	195.608	5.57
2010	107	Cote d'Ivoire	254	Oil, palm fruit	280.837	NA	NA	2.937
2010	81	Ghana	254	Oil, palm fruit	175.302	0	221056	2.981
2010	168	Papua New Guinea	254	Oil, palm fruit	1420.46	0	1.13069e+06	118.694
2010	157	Nicaragua	254	Oil, palm fruit	0.15293	0	60.8663	4.51
2010	216	Thailand	254	Oil, palm fruit	696.464	0	474988	3.613
2010	44	Colombia	254	Oil, palm fruit	111.643	0	71116.7	9.648
2010	58	Ecuador	254	Oil, palm fruit	27.2321	0	19498.2	2.575
2010	171	Philippines	254	Oil, palm fruit	24.6353	0	24980.2	3.939
2010	203	Spain	260	Olives	5617.51	3.0166e+06	1.24316e+07	2.701
2010	112	Jordan	260	Olives	0.177057	193.878	307.726	0.108
2010	154	NA	260	Olives	0.0682331	NA	NA	NA
2010	174	Portugal	260	Olives	101.167	13050.5	744691	2.74
2010	40	Chile	260	Olives	2.0452	1511.4	3648.64	21.914
2010	170	Peru	260	Olives	125.883	59039.2	160879	7.61
2010	105	Israel	260	Olives	0.227286	194.102	426.161	0.486
2010	138	Mexico	260	Olives	0.0152958	10.6917	24.5038	4.236
2010	299	NA	260	Olives	0.906978	191.372	3091.89	NA
2010	68	France	260	Olives	4.68124	1348.2	21786.5	5.064
2010	59	Egypt	260	Olives	2.06351	3268.61	697.468	1.681
2010	212	Syria	260	Olives	1.89055	2285.67	4854.92	0.976
2010	198	Slovenia	260	Olives	0.0147209	0	30.8845	4.224
2010	3	Albania	260	Olives	0.873998	151.202	4300.07	4.4
2010	121	Lebanon	260	Olives	0.8782	1050.33	1618.52	0.544
2010	50	Cyprus	260	Olives	3.85868	4460.64	7343.07	NA
2010	106	Italy	260	Olives	2017.8	254243	3.57555e+06	2.273
2010	98	Croatia	260	Olives	0.0238189	0.0238189	82.6755	4.398
2010	231	United States	260	Olives	0.405814	221.169	184.24	22
2010	223	Turkey	260	Olives	33.133	8945.9	71964.8	1.801
2010	143	Morocco	260	Olives	76.1278	105285	271015	0.939
2010	222	Tunisia	260	Olives	119.736	38914.2	1.05248e+06	0.869
2010	102	Iran	260	Olives	0.0246162	NA	NA	0.976
2010	10	Australia	260	Olives	2.70277	1345.98	3886.59	53.268
2010	9	Argentina	260	Olives	1.65935	1651.05	2737.92	13.678
2010	84	Greece	260	Olives	1161.63	253235	1.54032e+06	4.259
2010	169	Paraguay	265	Castor oil seed	0.110504	0	973.765	15.566
2010	21	Brazil	265	Castor oil seed	6.0205	9277.58	60819	16.749
2010	100	India	265	Castor oil seed	4148.66	5.89939e+06	3.16294e+07	0.881
2010	101	Indonesia	265	Castor oil seed	0.13505	0	7717.97	16.287
2010	216	Thailand	265	Castor oil seed	0.0691333	85.5179	1162.34	3.613
2010	216	Thailand	267	Sunflower seed	7.5705	0	48019.7	3.613
2010	183	Romania	267	Sunflower seed	354.534	41125.9	1.06608e+06	4.002
2010	169	Paraguay	267	Sunflower seed	14.5299	0	61258	15.566
2010	33	Canada	267	Sunflower seed	20.8135	26516.4	53490.8	110.909
2010	251	Zambia	267	Sunflower seed	0.0941307	0	831.927	5.161
2010	234	Uruguay	267	Sunflower seed	2.90351	66.7806	10786.5	14.962
2010	84	Greece	267	Sunflower seed	12.5231	8027.33	27688.6	4.259
2010	203	Spain	267	Sunflower seed	80.9743	73119.8	201707	2.701
2010	138	Mexico	267	Sunflower seed	0.137488	0	485.881	4.236
2010	174	Portugal	267	Sunflower seed	1.09703	3789.15	6215.78	2.74
2010	9	Argentina	267	Sunflower seed	650.953	7160.48	1.73935e+06	13.678
2010	223	Turkey	267	Sunflower seed	9.61898	2500.94	15582.8	1.801
2010	105	Israel	267	Sunflower seed	0.300341	1013.65	172.396	0.486
2010	113	Kyrgyz Republic	267	Sunflower seed	0.138583	52.3843	258.457	1.352
2010	167	Czech Republic	267	Sunflower seed	19.3209	0	33656.9	3.932
2010	11	Austria	267	Sunflower seed	78.3165	0	119824	2.873
2010	98	Croatia	267	Sunflower seed	3.91151	0	8143.76	4.398
2010	199	Slovak Republic	267	Sunflower seed	134.222	7113.74	279584	3.987
2010	21	Brazil	267	Sunflower seed	1.93308	0	8076.42	16.749
2010	154	NA	267	Sunflower seed	0.679908	NA	NA	NA
2010	202	South Africa	267	Sunflower seed	1.88782	134.035	5448.25	2.449
2010	52	Azerbaijan	267	Sunflower seed	0.0815127	0	155.363	1.916
2010	80	Bosnia and Herzegovina	267	Sunflower seed	0.0663008	0	474.117	4.4
2010	41	China	267	Sunflower seed	36.3133	12382.8	81850.2	1.508
2010	68	France	267	Sunflower seed	789.743	8687.17	972964	5.064
2010	173	Poland	267	Sunflower seed	7.35532	0	16652.4	3.103
2010	146	Moldova	267	Sunflower seed	69.4234	763.657	197718	4.089
2010	57	Belarus	267	Sunflower seed	0.256786	0	518.195	5.092
2010	40	Chile	267	Sunflower seed	0.320679	0	651.941	21.914
2010	231	United States	267	Sunflower seed	1424.25	162365	4.475e+06	22
2010	198	Slovenia	267	Sunflower seed	0.0933187	0	255.6	4.224
2010	185	Russia	267	Sunflower seed	169.32	1354.56	590418	12.681
2010	222	Tunisia	267	Sunflower seed	3.67068	0	11353.4	0.869
2010	27	Bulgaria	267	Sunflower seed	5595.15	55951.5	1.71995e+07	4.006
2010	106	Italy	267	Sunflower seed	38.6382	2627.4	68428.3	2.273
2010	59	Egypt	267	Sunflower seed	0.199449	180.502	91.1484	1.681
2010	97	Hungary	267	Sunflower seed	912.125	1824.25	1.72118e+06	4.007
2010	108	Kazakhstan	267	Sunflower seed	0.37716	0	1717.21	11.614
2010	100	India	267	Sunflower seed	0.823033	499.581	6985.9	0.881
2010	226	Uganda	267	Sunflower seed	0.197603	0	868.068	1.578
2010	272	Serbia	267	Sunflower seed	38.7324	NA	NA	4.37
2010	114	Kenya	267	Sunflower seed	0.0365101	0	142.828	1.018
2010	211	Switzerland	267	Sunflower seed	0.949045	0	1128.41	1.642
2010	10	Australia	267	Sunflower seed	0.472491	0	1923.51	53.268
2010	20	Botswana	267	Sunflower seed	0.26953	0	839.585	7.297
2010	79	Germany	267	Sunflower seed	46.7798	0	74847.6	3.061
2010	102	Iran	267	Sunflower seed	0.0153268	NA	NA	0.976
2010	230	Ukraine	267	Sunflower seed	2521.76	60522.3	7.85782e+06	4.3
2010	143	Morocco	267	Sunflower seed	0.0239921	68.2095	71.4484	0.939
2010	19	Bolivia	267	Sunflower seed	17.2647	0	88361	11.75
2010	215	Tanzania	267	Sunflower seed	3.67659	NA	NA	2.006
2010	231	United States	27	Rice, paddy	129.02	109280	54446.4	22
2010	106	Italy	27	Rice, paddy	11762	5.19881e+06	6.83373e+06	2.273
2010	234	Uruguay	27	Rice, paddy	227.565	140635	170901	14.962
2010	27	Bulgaria	27	Rice, paddy	5.70233	4179.81	3603.87	4.006
2010	84	Greece	27	Rice, paddy	166.405	98511.6	41434.8	4.259
2010	183	Romania	27	Rice, paddy	20.1671	17202.5	18251.2	4.002
2010	169	Paraguay	27	Rice, paddy	0.608867	342.183	913.3	15.566
2010	237	Vietnam	27	Rice, paddy	85.9972	13845.5	88233.1	3.809
2010	28	Myanmar	27	Rice, paddy	0.264135	23.2439	519.026	9.429
2010	9	Argentina	27	Rice, paddy	8.91343	3993.22	9858.25	13.678
2010	159	Nigeria	27	Rice, paddy	0.0276442	0.248798	113.839	2.328
2010	129	Madagascar	27	Rice, paddy	0.100576	78.8513	256.066	5.758
2010	138	Mexico	27	Rice, paddy	0.0107284	3.74421	13.2925	4.236
2010	68	France	27	Rice, paddy	176.269	139429	89368.2	5.064
2010	100	India	27	Rice, paddy	613.483	277294	855196	0.881
2010	165	Pakistan	27	Rice, paddy	693.154	1.51939e+06	463027	0.594
2010	117	South Korea	27	Rice, paddy	1.43152	NA	NA	1.14
2010	223	Turkey	27	Rice, paddy	1.6401	1451.49	495.31	1.801
2010	101	Indonesia	27	Rice, paddy	0.105469	19.1953	157.043	16.287
2010	158	Niger	27	Rice, paddy	0.486842	933.763	625.105	1.614
2010	110	Japan	27	Rice, paddy	3.33195	569.764	1919.21	3.555
2010	102	Iran	27	Rice, paddy	0.476345	NA	NA	0.976
2010	59	Egypt	27	Rice, paddy	316.953	317904	18700.2	1.681
2010	58	Ecuador	27	Rice, paddy	0.252498	94.1817	346.68	2.575
2010	195	Senegal	27	Rice, paddy	0.0219687	20.2991	27.5268	1.544
2010	133	Mali	27	Rice, paddy	0.0162354	20.3754	35.799	3.605
2010	91	Guyana	27	Rice, paddy	401.468	163799	535959	127.073
2010	131	Malaysia	27	Rice, paddy	0.761707	430.364	1774.78	25.815
2010	170	Peru	27	Rice, paddy	0.0603147	24.3068	30.6399	7.61
2010	41	China	27	Rice, paddy	11.2827	2775.55	6194.21	1.508
2010	108	Kazakhstan	27	Rice, paddy	4.36845	14324.1	1594.48	11.614
2010	214	Taiwan	27	Rice, paddy	0.154964	NA	NA	2
2010	97	Hungary	27	Rice, paddy	1.36186	1054.08	1105.83	4.007
2010	185	Russia	27	Rice, paddy	0.296726	507.996	237.678	12.681
2010	203	Spain	27	Rice, paddy	4375.89	5.27295e+06	1.49655e+06	2.701
2010	216	Thailand	27	Rice, paddy	5646.76	2.12318e+06	1.03053e+07	3.613
2010	143	Morocco	27	Rice, paddy	6.16453	7878.27	1806.21	0.939
2010	154	NA	27	Rice, paddy	0.360694	NA	NA	NA
2010	44	Colombia	27	Rice, paddy	0.0149402	5.28884	16.0906	9.648
2010	38	Sri Lanka	27	Rice, paddy	4.71636	2966.59	5975.62	2.1
2010	16	Bangladesh	27	Rice, paddy	16.1835	3042.49	21815.3	2.294
2010	115	Cambodia	27	Rice, paddy	78.6778	14791.4	190715	9.505
2010	53	Benin	27	Rice, paddy	0.0251745	0.679711	43.4764	2.331
2010	171	Philippines	27	Rice, paddy	0.0211605	4.38023	42.0037	3.939
2010	120	Lao	27	Rice, paddy	2.62858	NA	NA	8.865
2010	21	Brazil	27	Rice, paddy	59.7569	21273.5	116108	16.749
2010	207	Suriname	27	Rice, paddy	143.365	51754.9	133473	121.744
2010	10	Australia	27	Rice, paddy	0.113936	131.027	28.8259	53.268
2010	174	Portugal	27	Rice, paddy	38.7618	42095.3	12946.4	2.74
2010	108	Kazakhstan	270	Rapeseed	5637.55	0	2.62428e+07	11.614
2010	162	Norway	270	Rapeseed	0.606989	0	1093.79	55.393
2010	9	Argentina	270	Rapeseed	35.5954	0	124584	13.678
2010	119	Latvia	270	Rapeseed	20821.8	0	4.0769e+07	8.345
2010	41	China	270	Rapeseed	19.7533	0	27397.9	1.508
2010	198	Slovenia	270	Rapeseed	9.82138	0	16421.3	4.224
2010	98	Croatia	270	Rapeseed	39.7256	0	87038.7	4.398
2010	10	Australia	270	Rapeseed	2640.93	0	5.55916e+06	53.268
2010	141	Mongolia	270	Rapeseed	0.361088	0	0	8.853
2010	150	Netherlands	270	Rapeseed	89.388	0	78303.9	3.277
2010	104	Ireland	270	Rapeseed	72.076	0	81013.4	19.74
2010	255	Belgium	270	Rapeseed	297.379	0	295000	2.037
2010	68	France	270	Rapeseed	18907.6	94538.1	2.21219e+07	5.064
2010	231	United States	270	Rapeseed	156.138	3278.9	438436	22
2010	230	Ukraine	270	Rapeseed	9559.13	0	3.67644e+07	4.3
2010	199	Slovak Republic	270	Rapeseed	1277.46	6387.32	2.35948e+06	3.987
2010	229	United Kingdom	270	Rapeseed	3461.1	0	3.62031e+06	5.868
2010	21	Brazil	270	Rapeseed	13.1784	0	37268.5	16.749
2010	54	Denmark	270	Rapeseed	6308.34	0	7.72141e+06	7.856
2010	11	Austria	270	Rapeseed	446.513	0	741658	2.873
2010	156	New Zealand	270	Rapeseed	0.929412	0	2038.2	58.852
2010	63	Estonia	270	Rapeseed	17182.1	0	3.98796e+07	8.345
2010	203	Spain	270	Rapeseed	23.8598	1694.05	47767.3	2.701
2010	234	Uruguay	270	Rapeseed	0.0386392	0	64.0638	14.962
2010	84	Greece	270	Rapeseed	0.545101	0	0	4.259
2010	185	Russia	270	Rapeseed	4977.44	0	1.70179e+07	12.681
2010	113	Kyrgyz Republic	270	Rapeseed	0.013542	0	38.4594	1.352
2010	79	Germany	270	Rapeseed	85314.8	0	8.59973e+07	3.061
2010	33	Canada	270	Rapeseed	1570.75	0	4.26774e+06	110.909
2010	167	Czech Republic	270	Rapeseed	6572.45	0	1.02662e+07	3.932
2010	210	Sweden	270	Rapeseed	2055.77	0	2.39703e+06	20.223
2010	173	Poland	270	Rapeseed	18229.7	0	2.6743e+07	3.103
2010	272	Serbia	270	Rapeseed	35.3082	NA	NA	4.37
2010	223	Turkey	270	Rapeseed	3.63012	0	4624.78	1.801
2010	106	Italy	270	Rapeseed	21.9147	0	72866.3	2.273
2010	169	Paraguay	270	Rapeseed	107.37	0	372360	15.566
2010	211	Switzerland	270	Rapeseed	17.8596	0	20145.6	1.642
2010	238	Ethiopia	270	Rapeseed	15.8498	NA	NA	0.815
2010	154	NA	270	Rapeseed	0.108046	NA	NA	NA
2010	57	Belarus	270	Rapeseed	4102.69	0	1.92211e+07	5.092
2010	202	South Africa	270	Rapeseed	0.217877	0	822.923	2.449
2010	40	Chile	270	Rapeseed	5.44298	0	5432.1	21.914
2010	126	Lithuania	270	Rapeseed	16114.8	0	3.43405e+07	8.15
2010	80	Bosnia and Herzegovina	270	Rapeseed	0.838851	0	1777.52	4.4
2010	183	Romania	270	Rapeseed	3683.04	0	1.13953e+07	4.002
2010	27	Bulgaria	270	Rapeseed	2654.33	0	7.8409e+06	4.006
2010	16	Bangladesh	270	Rapeseed	0.0487885	19.1251	188.811	2.294
2010	97	Hungary	270	Rapeseed	4314.05	194132	9.4909e+06	4.007
2010	143	Morocco	270	Rapeseed	0.0474615	0	92.0754	0.939
2010	256	Luxembourg	270	Rapeseed	96.6777	0	99868	1.954
2010	146	Moldova	270	Rapeseed	102.331	0	342603	4.089
2010	102	Iran	270	Rapeseed	0.204188	NA	NA	0.976
2010	165	Pakistan	270	Rapeseed	0.182283	208.532	259.389	0.594
2010	100	India	270	Rapeseed	70.6776	106582	116901	0.881
2010	231	United States	280	Safflower seed	0.150337	125.531	202.353	22
2010	138	Mexico	280	Safflower seed	1.44931	1069.59	4769.68	4.236
2010	9	Argentina	280	Safflower seed	3.63271	908.177	25269.1	13.678
2010	237	Vietnam	289	Sesame seed	0.0215438	0.0430877	170.799	3.809
2010	206	NA	289	Sesame seed	49.2638	79166.9	368394	NA
2010	114	Kenya	289	Sesame seed	0.93058	189.838	6720.65	1.018
2010	157	Nicaragua	289	Sesame seed	1.99399	0	16187.2	4.51
2010	217	Togo	289	Sesame seed	0.0145585	0.0145585	221.827	1.598
2010	201	Somalia	289	Sesame seed	2.33121	1345.11	16808	1.984
2010	212	Syria	289	Sesame seed	0.0711934	650.28	248.251	0.976
2010	84	Greece	289	Sesame seed	0.3281	826.483	1066.65	4.259
2010	169	Paraguay	289	Sesame seed	42.749	42.749	280219	15.566
2010	236	Venezuela	289	Sesame seed	8.18796	NA	NA	17.1
2010	195	Senegal	289	Sesame seed	0.269572	0	2311.85	1.544
2010	215	Tanzania	289	Sesame seed	5.36177	NA	NA	2.006
2010	115	Cambodia	289	Sesame seed	1.13702	0	9096.18	9.505
2010	121	Lebanon	289	Sesame seed	0.0362779	2.1404	39.8694	0.544
2010	2	Afghanistan	289	Sesame seed	0.0136974	75.7191	33.9832	0.853
2010	133	Mali	289	Sesame seed	3.92373	294.28	45048.3	3.605
2010	89	Guatemala	289	Sesame seed	9.20915	18.4183	61314.5	4.459
2010	102	Iran	289	Sesame seed	0.017529	NA	NA	0.976
2010	165	Pakistan	289	Sesame seed	1.69849	5188.9	5605.03	0.594
2010	59	Egypt	289	Sesame seed	0.826022	1616.53	1032.53	1.681
2010	170	Peru	289	Sesame seed	0.0242274	10.2239	69.4841	7.61
2010	238	Ethiopia	289	Sesame seed	88.6674	NA	NA	0.815
2010	106	Italy	289	Sesame seed	0.372623	16.0228	143.833	2.273
2010	100	India	289	Sesame seed	257.271	51711.4	3.61954e+06	0.881
2010	226	Uganda	289	Sesame seed	3.21019	0	19662.4	1.578
2010	120	Lao	289	Sesame seed	0.32301	NA	NA	8.865
2010	41	China	289	Sesame seed	4.00792	208.412	17097.8	1.508
2010	144	Mozambique	289	Sesame seed	0.50976	16.8221	4034.24	3.451
2010	95	Honduras	289	Sesame seed	0.0243482	0.194785	117.991	4.51
2010	28	Myanmar	289	Sesame seed	1.1732	42.235	16029.4	9.429
2010	117	South Korea	289	Sesame seed	0.01724	NA	NA	1.14
2010	249	Yemen	289	Sesame seed	0.0205844	34.8082	71.0574	0.408
2010	159	Nigeria	289	Sesame seed	16.4298	65.7192	135299	2.328
2010	60	El Salvador	289	Sesame seed	0.0609111	67.9768	261.796	4.51
2010	214	Taiwan	289	Sesame seed	0.0185174	NA	NA	2
2010	223	Turkey	289	Sesame seed	0.323149	600.411	1769.57	1.801
2010	158	Niger	289	Sesame seed	0.583311	681.891	5612.62	1.614
2010	38	Sri Lanka	289	Sesame seed	2.01537	3813.09	12035.8	2.1
2010	138	Mexico	289	Sesame seed	7.40478	3613.53	55454.4	4.236
2010	90	Guinea	289	Sesame seed	0.0211164	0	468.53	2.492
2010	16	Bangladesh	289	Sesame seed	0.460107	0	2158.36	2.294
2010	194	Saudi Arabia	289	Sesame seed	0.115277	432.058	201.735	0.479
2010	233	Burkina Faso	289	Sesame seed	17.517	140.136	162628	0.973
2010	216	Thailand	289	Sesame seed	12.5302	914.702	84403.2	3.613
2010	41	China	292	Mustard seed	0.782822	28.9644	2355.51	1.508
2010	33	Canada	292	Mustard seed	617.043	0	1.29702e+06	110.909
2010	238	Ethiopia	292	Mustard seed	0.0895497	NA	NA	0.815
2010	18	Bhutan	292	Mustard seed	0.110526	0	477.142	2.534
2010	183	Romania	292	Mustard seed	24.488	0	67195.2	4.002
2010	185	Russia	292	Mustard seed	13.1446	0	47333.8	12.681
2010	272	Serbia	292	Mustard seed	0.69828	NA	NA	4.37
2010	231	United States	292	Mustard seed	21.429	0	46201	22
2010	68	France	292	Mustard seed	78.8921	0	82600	5.064
2010	126	Lithuania	292	Mustard seed	1.3507	0	3053.92	8.15
2010	97	Hungary	292	Mustard seed	39.6391	0	49667.8	4.007
2010	199	Slovak Republic	292	Mustard seed	1.65686	0	3759.42	3.987
2010	54	Denmark	292	Mustard seed	0.627901	0	909.828	7.856
2010	167	Czech Republic	292	Mustard seed	159.436	0	248401	3.932
2010	230	Ukraine	292	Mustard seed	1039.37	0	2.81148e+06	4.3
2010	79	Germany	292	Mustard seed	62.2312	0	68952.2	3.061
2010	97	Hungary	296	Poppy seed	0.609465	0	780.115	4.007
2010	203	Spain	296	Poppy seed	1.97259	0	546.409	2.701
2010	199	Slovak Republic	296	Poppy seed	0.0899297	0	168.888	3.987
2010	79	Germany	296	Poppy seed	3.52333	0	2867.99	3.061
2010	223	Turkey	296	Poppy seed	26.155	0	72266.4	1.801
2010	11	Austria	296	Poppy seed	0.403634	0	281.736	2.873
2010	183	Romania	296	Poppy seed	0.0239338	0	30.6832	4.002
2010	27	Bulgaria	296	Poppy seed	0.633435	0	0	4.006
2010	150	Netherlands	296	Poppy seed	1.21508	0	421.632	3.277
2010	68	France	296	Poppy seed	5.37751	0	10394.7	5.064
2010	167	Czech Republic	296	Poppy seed	7.02211	0	7963.07	3.932
2010	108	Kazakhstan	328	Seed cotton	21.7908	39528.6	23381.6	11.614
2010	237	Vietnam	328	Seed cotton	0.0182749	0	40.3328	3.809
2010	235	Uzbekistan	328	Seed cotton	39.0918	130606	13721.2	1.147
2010	238	Ethiopia	328	Seed cotton	2.48668	NA	NA	0.815
2010	32	Cameroon	328	Seed cotton	8.10723	0	33904.4	4.848
2010	215	Tanzania	328	Seed cotton	3.69525	NA	NA	2.006
2010	89	Guatemala	328	Seed cotton	0.0270751	0	57.8865	4.459
2010	223	Turkey	328	Seed cotton	92.4428	215392	44002.8	1.801
2010	27	Bulgaria	328	Seed cotton	0.02879	22.888	121.091	4.006
2010	203	Spain	328	Seed cotton	20.8953	45050.2	8337.22	2.701
2010	9	Argentina	328	Seed cotton	13.0421	1252.05	74914	13.678
2010	213	Turkmenistan	328	Seed cotton	7.98105	38085.6	7973.07	2.688
2010	28	Myanmar	328	Seed cotton	0.0305107	0.244086	278.227	9.429
2010	21	Brazil	328	Seed cotton	395.129	7112.32	872444	16.749
2010	114	Kenya	328	Seed cotton	0.0112364	3.59563	75.8117	1.018
2010	159	Nigeria	328	Seed cotton	0.651576	11.0768	1529.25	2.328
2010	41	China	328	Seed cotton	1236.02	305296	1.77986e+06	1.508
2010	157	Nicaragua	328	Seed cotton	0.0194782	0	63.7911	4.51
2010	59	Egypt	328	Seed cotton	4.76272	18122.2	733.459	1.681
2010	37	Central African Republic	328	Seed cotton	5.56142	0	39497.2	5.028
2010	206	NA	328	Seed cotton	2.2889	10446.6	4813.57	NA
2010	95	Honduras	328	Seed cotton	0.53715	23.6346	1665.7	4.51
2010	113	Kyrgyz Republic	328	Seed cotton	0.3977	480.023	315.376	1.352
2010	52	Azerbaijan	328	Seed cotton	0.148156	606.403	231.568	1.916
2010	48	Costa Rica	328	Seed cotton	0.0123348	0	79.6333	4.51
2010	249	Yemen	328	Seed cotton	0.045391	272.891	84.7904	0.408
2010	16	Bangladesh	328	Seed cotton	0.171638	0	158.937	2.294
2010	84	Greece	328	Seed cotton	64.0379	75948.9	34196.2	4.259
2010	20	Botswana	328	Seed cotton	0.05773	0	107.724	7.297
2010	101	Indonesia	328	Seed cotton	0.0968752	0	507.336	16.287
2010	226	Uganda	328	Seed cotton	0.914729	0	12273.8	1.578
2010	222	Tunisia	328	Seed cotton	0.0963324	0	242.276	0.869
2010	107	Cote d'Ivoire	328	Seed cotton	10.5002	NA	NA	2.937
2010	231	United States	328	Seed cotton	1589.22	1.43507e+06	3.35962e+06	22
2010	165	Pakistan	328	Seed cotton	137.478	296402	135003	0.594
2010	10	Australia	328	Seed cotton	35.3748	64629.7	29608.7	53.268
2010	169	Paraguay	328	Seed cotton	1.33073	0	10707.1	15.566
2010	233	Burkina Faso	328	Seed cotton	18.8228	0	93267.1	0.973
2010	138	Mexico	328	Seed cotton	1.8925	3974.25	1514	4.236
2010	39	Chad	328	Seed cotton	4.01257	0	33099.7	4.791
2010	44	Colombia	328	Seed cotton	0.34094	24.5476	778.365	9.648
2010	181	Zimbabwe	328	Seed cotton	6.77333	155.787	17305.9	1.66
2010	120	Lao	328	Seed cotton	0.0387398	NA	NA	8.865
2010	195	Senegal	328	Seed cotton	1.93854	0	12468.7	1.544
2010	2	Afghanistan	328	Seed cotton	0.524186	3590.15	231.166	0.853
2010	144	Mozambique	328	Seed cotton	1.52062	0	15066.3	3.451
2010	208	Tajikistan	328	Seed cotton	9.56122	36858.5	5229.99	1.08
2010	216	Thailand	328	Seed cotton	0.100158	0	384.906	3.613
2010	170	Peru	328	Seed cotton	0.0556723	102.715	87.9622	7.61
2010	53	Benin	328	Seed cotton	9.07264	0	43122.3	2.331
2010	251	Zambia	328	Seed cotton	4.56541	13.6962	9030.39	5.161
2010	158	Niger	328	Seed cotton	0.0505617	96.9269	97.4325	1.614
2010	212	Syria	328	Seed cotton	15.9665	32954.8	1069.76	0.976
2010	217	Togo	328	Seed cotton	1.83454	0	8765.43	1.598
2010	209	Swaziland	328	Seed cotton	0.0156409	0	94.9561	1.163
2010	29	Burundi	328	Seed cotton	0.0582219	0	382.285	0.42
2010	81	Ghana	328	Seed cotton	0.113581	0	661.04	2.981
2010	102	Iran	328	Seed cotton	0.221459	NA	NA	0.976
2010	202	South Africa	328	Seed cotton	0.341585	1294.61	473.436	2.449
2010	133	Mali	328	Seed cotton	5.91556	0	28039.8	3.605
2010	130	Malawi	328	Seed cotton	2.22421	0	13807.9	1.342
2010	100	India	328	Seed cotton	120.78	225375	783860	0.881
2010	105	Israel	328	Seed cotton	4.86341	5135.76	1410.39	0.486
2010	129	Madagascar	328	Seed cotton	0.0123808	4.72948	16.8998	5.758
2010	68	France	333	Linseed	3.66348	1179.64	18841.3	5.064
2010	230	Ukraine	333	Linseed	11.3715	1444.18	95077.2	4.3
2010	100	India	333	Linseed	1.41724	205.501	18748.7	0.881
2010	199	Slovak Republic	333	Linseed	0.133142	56.8517	477.448	3.987
2010	255	Belgium	333	Linseed	5.5812	161.855	23725.7	2.037
2010	119	Latvia	333	Linseed	0.331596	0.331596	3315.96	8.345
2010	27	Bulgaria	333	Linseed	0.543063	170.522	3649.38	4.006
2010	10	Australia	333	Linseed	0.0157857	6.72473	44.6421	53.268
2010	156	New Zealand	333	Linseed	0.0228072	4.65267	46.8004	58.852
2010	126	Lithuania	333	Linseed	0.470392	3.29275	4312.09	8.15
2010	57	Belarus	333	Linseed	0.582864	2.91432	9227.91	5.092
2010	167	Czech Republic	333	Linseed	0.296799	8.60716	1399.11	3.932
2010	106	Italy	333	Linseed	0.182529	109.335	932.723	2.273
2010	108	Kazakhstan	333	Linseed	21.8901	77534.8	84714.7	11.614
2010	185	Russia	333	Linseed	36.302	4065.83	207139	12.681
2010	234	Uruguay	333	Linseed	0.155596	13.3812	664.239	14.962
2010	183	Romania	333	Linseed	0.693055	72.0777	3035.58	4.002
2010	229	United Kingdom	333	Linseed	21.1936	360.292	44273.5	5.868
2010	173	Poland	333	Linseed	0.0467998	0.0467998	294.511	3.103
2010	11	Austria	333	Linseed	0.37796	17.0082	1169.41	2.873
2010	63	Estonia	333	Linseed	0.926057	0.926057	4675.66	8.345
2010	79	Germany	333	Linseed	8.64659	34.5864	27997.7	3.061
2010	231	United States	333	Linseed	36.4985	34929.1	87924.9	22
2010	97	Hungary	333	Linseed	0.0425867	4.00315	132.87	4.007
2010	54	Denmark	333	Linseed	0.0701443	0.210433	395.895	7.856
2010	33	Canada	333	Linseed	666.539	19996.2	1.80832e+06	110.909
2010	41	China	333	Linseed	3.13368	209.957	15853.3	1.508
2010	238	Ethiopia	333	Linseed	2.03455	NA	NA	0.815
2010	203	Spain	333	Linseed	0.0775996	233.264	325.608	2.701
2010	210	Sweden	333	Linseed	437.787	2188.94	1.21092e+06	20.223
2010	9	Argentina	333	Linseed	6.89284	4266.67	44031.5	13.678
2010	150	Netherlands	333	Linseed	0.836261	16.7252	2470.31	3.277
2010	215	Tanzania	339	Oilseeds nes	51.4479	NA	NA	2.006
2010	170	Peru	339	Oilseeds nes	38.5649	0	0	7.61
2010	106	Italy	339	Oilseeds nes	88.4772	0	0	2.273
2010	107	Cote d'Ivoire	339	Oilseeds nes	4.11048	NA	NA	2.937
2010	181	Zimbabwe	339	Oilseeds nes	0.125493	75.9232	1035.32	1.66
2010	165	Pakistan	339	Oilseeds nes	9.08133	0	0	0.594
2010	33	Canada	339	Oilseeds nes	9.74022	1909.08	93067.8	110.909
2010	53	Benin	339	Oilseeds nes	0.584481	2.33792	2206.41	2.331
2010	105	Israel	339	Oilseeds nes	5.36428	30217	4978.06	0.486
2010	167	Czech Republic	339	Oilseeds nes	4.99519	244.764	18951.7	3.932
2010	100	India	339	Oilseeds nes	605.012	313396	8.47621e+06	0.881
2010	143	Morocco	339	Oilseeds nes	2.50792	9688.11	2585.67	0.939
2010	48	Costa Rica	339	Oilseeds nes	2.7827	0	0	4.51
2010	159	Nigeria	339	Oilseeds nes	0.15192	0	0	2.328
2010	144	Mozambique	339	Oilseeds nes	0.0286306	3.89376	377.695	3.451
2010	98	Croatia	339	Oilseeds nes	3.18291	0	0	4.398
2010	16	Bangladesh	339	Oilseeds nes	0.988332	0.988332	3529.33	2.294
2010	131	Malaysia	339	Oilseeds nes	641.435	239255	5.09236e+06	25.815
2010	202	South Africa	339	Oilseeds nes	8.13071	16318.3	22180.6	2.449
2010	185	Russia	339	Oilseeds nes	2.34481	321.239	10028.8	12.681
2010	117	South Korea	339	Oilseeds nes	3.07751	NA	NA	1.14
2010	199	Slovak Republic	339	Oilseeds nes	13.2077	7079.32	33111.7	3.987
2010	108	Kazakhstan	339	Oilseeds nes	75.072	157951	80552.2	11.614
2010	27	Bulgaria	339	Oilseeds nes	17.3187	2286.06	33407.7	4.006
2010	68	France	339	Oilseeds nes	96.8399	0	0	5.064
2010	149	Nepal	339	Oilseeds nes	14.7635	310.034	112129	0.716
2010	113	Kyrgyz Republic	339	Oilseeds nes	0.0281175	99.8454	108.674	1.352
2010	81	Ghana	339	Oilseeds nes	3.01555	0	0	2.981
2010	171	Philippines	339	Oilseeds nes	0.135974	14.0053	1250.01	3.939
2010	238	Ethiopia	339	Oilseeds nes	473.006	NA	NA	0.815
2010	41	China	339	Oilseeds nes	546.357	0	0	1.508
2010	129	Madagascar	339	Oilseeds nes	0.0653278	0	0	5.758
2010	226	Uganda	339	Oilseeds nes	0.506602	0	0	1.578
2010	211	Switzerland	339	Oilseeds nes	0.364839	0	0	1.642
2010	214	Taiwan	339	Oilseeds nes	2.18667	NA	NA	2
2010	119	Latvia	339	Oilseeds nes	50.1654	50.1654	104595	8.345
2010	11	Austria	339	Oilseeds nes	34.245	1883.47	72325.4	2.873
2010	158	Niger	339	Oilseeds nes	16.6988	0	0	1.614
2010	37	Central African Republic	339	Oilseeds nes	0.0102191	0	0	5.028
2010	114	Kenya	339	Oilseeds nes	7.51059	3169.47	48405.8	1.018
2010	97	Hungary	339	Oilseeds nes	43.6364	5018.19	92901.9	4.007
2010	174	Portugal	339	Oilseeds nes	53.3679	0	0	2.74
2010	102	Iran	339	Oilseeds nes	0.07642	NA	NA	0.976
2010	206	NA	339	Oilseeds nes	2.32593	0	0	NA
2010	173	Poland	339	Oilseeds nes	133.302	399.905	541338	3.103
2010	126	Lithuania	339	Oilseeds nes	15.8766	0	0	8.15
2010	52	Azerbaijan	339	Oilseeds nes	0.111964	56.0937	81.5095	1.916
2010	21	Brazil	339	Oilseeds nes	133.032	0	0	16.749
2010	230	Ukraine	339	Oilseeds nes	15.6171	1733.49	63217.8	4.3
2010	202	South Africa	358	Cabbages and other brassicas	0.366925	22.0155	32.2894	2.449
2010	272	Serbia	358	Cabbages and other brassicas	28.1453	NA	NA	4.37
2010	59	Egypt	358	Cabbages and other brassicas	1.17593	245.769	38.8056	1.681
2010	173	Poland	358	Cabbages and other brassicas	401.656	401.656	35345.7	3.103
2010	119	Latvia	358	Cabbages and other brassicas	3.57612	0	600.789	8.345
2010	117	South Korea	358	Cabbages and other brassicas	0.0120129	NA	NA	1.14
2010	165	Pakistan	358	Cabbages and other brassicas	0.0878897	16.6112	6.15228	0.594
2010	41	China	358	Cabbages and other brassicas	0.207148	0.828592	49.0941	1.508
2010	126	Lithuania	358	Cabbages and other brassicas	0.165745	0.331491	24.5303	8.15
2010	229	United Kingdom	358	Cabbages and other brassicas	2.70084	18.9059	345.708	5.868
2010	198	Slovenia	358	Cabbages and other brassicas	0.144294	0.288588	18.614	4.224
2010	216	Thailand	358	Cabbages and other brassicas	0.0216209	0.583766	9.79429	3.613
2010	150	Netherlands	358	Cabbages and other brassicas	676.161	2028.48	70996.9	3.277
2010	97	Hungary	358	Cabbages and other brassicas	1464.37	42466.7	190368	4.007
2010	63	Estonia	358	Cabbages and other brassicas	24.8077	24.8077	4837.5	8.345
2010	167	Czech Republic	358	Cabbages and other brassicas	22.2551	222.551	2203.25	3.932
2010	80	Bosnia and Herzegovina	358	Cabbages and other brassicas	0.913368	12.7872	330.639	4.4
2010	10	Australia	358	Cabbages and other brassicas	0.246455	34.9966	19.9629	53.268
2010	104	Ireland	358	Cabbages and other brassicas	0.198566	0	13.5025	19.74
2010	27	Bulgaria	358	Cabbages and other brassicas	1.09694	36.1991	176.608	4.006
2010	199	Slovak Republic	358	Cabbages and other brassicas	8.70595	522.357	1628.01	3.987
2010	231	United States	358	Cabbages and other brassicas	0.0160033	1.9044	1.96841	22
2010	223	Turkey	358	Cabbages and other brassicas	0.629431	56.6488	58.5371	1.801
2010	211	Switzerland	358	Cabbages and other brassicas	0.0283054	0.0283054	4.81191	1.642
2010	106	Italy	358	Cabbages and other brassicas	192.448	12894	35410.4	2.273
2010	143	Morocco	358	Cabbages and other brassicas	1.49058	205.701	104.341	0.939
2010	102	Iran	358	Cabbages and other brassicas	0.0100541	NA	NA	0.976
2010	203	Spain	358	Cabbages and other brassicas	1235.03	108682	100037	2.701
2010	11	Austria	358	Cabbages and other brassicas	7.31651	190.229	556.055	2.873
2010	273	Montenegro	358	Cabbages and other brassicas	0.0292947	NA	NA	4.4
2010	79	Germany	358	Cabbages and other brassicas	410.74	4107.4	27930.3	3.061
2010	210	Sweden	358	Cabbages and other brassicas	72.839	728.39	5171.57	20.223
2010	68	France	358	Cabbages and other brassicas	10.4654	418.618	1527.95	5.064
2010	162	Norway	358	Cabbages and other brassicas	0.231902	1.15951	24.3498	55.393
2010	212	Syria	358	Cabbages and other brassicas	0.0710482	13.9965	4.40499	0.976
2010	174	Portugal	358	Cabbages and other brassicas	23.7928	1855.84	3402.37	2.74
2010	84	Greece	358	Cabbages and other brassicas	0.0851987	7.92348	8.34947	4.259
2010	105	Israel	358	Cabbages and other brassicas	0.0769339	9.07821	3.53896	0.486
2010	3	Albania	358	Cabbages and other brassicas	0.0190963	2.0624	2.38704	4.4
2010	255	Belgium	358	Cabbages and other brassicas	34.1495	102.449	4405.29	2.037
2010	183	Romania	358	Cabbages and other brassicas	1.69454	27.1127	266.043	4.002
2010	54	Denmark	358	Cabbages and other brassicas	0.453026	2.71816	44.3965	7.856
2010	194	Saudi Arabia	358	Cabbages and other brassicas	0.0310467	0	0	0.479
2010	154	NA	358	Cabbages and other brassicas	29.6169	NA	NA	NA
2010	114	Kenya	358	Cabbages and other brassicas	0.940921	24.4639	205.121	1.018
2010	222	Tunisia	366	Artichokes	0.0476602	5.05199	29.2634	0.869
2010	106	Italy	366	Artichokes	2.97294	490.535	1709.44	2.273
2010	203	Spain	366	Artichokes	10.0097	1541.5	3083	2.701
2010	143	Morocco	366	Artichokes	0.34399	74.6459	87.7175	0.939
2010	68	France	366	Artichokes	11.3459	3267.62	10676.5	5.064
2010	105	Israel	366	Artichokes	0.0104872	14.7974	3.99562	0.486
2010	59	Egypt	366	Artichokes	0.260507	220.389	16.1514	1.681
2010	41	China	367	Asparagus	0.0123347	0.345373	19.8713	1.508
2010	231	United States	367	Asparagus	0.0490323	65.5562	46.7278	22
2010	97	Hungary	367	Asparagus	250.232	62057.4	257238	4.007
2010	58	Ecuador	367	Asparagus	0.0839633	53.9884	202.603	2.575
2010	229	United Kingdom	367	Asparagus	0.0419235	4.40197	84.3083	5.868
2010	138	Mexico	367	Asparagus	3.66734	2611.15	4686.87	4.236
2010	154	NA	367	Asparagus	0.246441	NA	NA	NA
2010	106	Italy	367	Asparagus	5.59705	2149.27	4679.13	2.273
2010	199	Slovak Republic	367	Asparagus	0.0241887	6.96635	22.7132	3.987
2010	170	Peru	367	Asparagus	93.4003	44645.3	54359	7.61
2010	143	Morocco	367	Asparagus	0.926611	946.069	442.92	0.939
2010	150	Netherlands	367	Asparagus	66.8222	1336.44	47711.1	3.277
2010	11	Austria	367	Asparagus	0.131349	40.9807	122.417	2.873
2010	84	Greece	367	Asparagus	12.1348	15241.3	10168.9	4.259
2010	68	France	367	Asparagus	1.24444	475.376	2139.19	5.064
2010	255	Belgium	367	Asparagus	19.386	329.562	14268.1	2.037
2010	9	Argentina	367	Asparagus	0.0120593	6.94616	14.9053	13.678
2010	114	Kenya	367	Asparagus	0.0363532	2.50837	40.7883	1.018
2010	216	Thailand	367	Asparagus	0.685665	205.7	1673.02	3.613
2010	223	Turkey	367	Asparagus	0.0241529	15.1438	23.7906	1.801
2010	173	Poland	367	Asparagus	1.54424	18.5308	756.676	3.103
2010	79	Germany	367	Asparagus	11.7746	2025.24	14200.2	3.061
2010	203	Spain	367	Asparagus	34.877	51687.7	35051.4	2.701
2010	211	Switzerland	372	Lettuce and chicory	0.182361	0.547084	29.3602	1.642
2010	27	Bulgaria	372	Lettuce and chicory	0.0182586	0.401689	3.45087	4.006
2010	106	Italy	372	Lettuce and chicory	746.536	29114.9	103022	2.273
2010	202	South Africa	372	Lettuce and chicory	0.0521804	6.73127	8.5054	2.449
2010	68	France	372	Lettuce and chicory	278.382	4454.12	26446.3	5.064
2010	150	Netherlands	372	Lettuce and chicory	2451.8	12259	161819	3.277
2010	100	India	372	Lettuce and chicory	0.283986	5.39573	147.105	0.881
2010	223	Turkey	372	Lettuce and chicory	1.57722	100.942	129.332	1.801
2010	33	Canada	372	Lettuce and chicory	0.0163197	0.0489592	2.05629	110.909
2010	54	Denmark	372	Lettuce and chicory	38.2592	38.2592	3098.99	7.856
2010	198	Slovenia	372	Lettuce and chicory	0.399592	0.399592	26.3731	4.224
2010	231	United States	372	Lettuce and chicory	9.9774	419.051	299.322	22
2010	210	Sweden	372	Lettuce and chicory	1678.9	3357.79	164532	20.223
2010	143	Morocco	372	Lettuce and chicory	8.68791	234.574	599.466	0.939
2010	229	United Kingdom	372	Lettuce and chicory	19.2974	96.4868	1833.25	5.868
2010	174	Portugal	372	Lettuce and chicory	45.0869	2344.52	3020.82	2.74
2010	119	Latvia	372	Lettuce and chicory	1.16694	1.16694	1119.1	8.345
2010	138	Mexico	372	Lettuce and chicory	0.269713	13.216	31.2867	4.236
2010	59	Egypt	372	Lettuce and chicory	26.5839	4412.93	425.342	1.681
2010	199	Slovak Republic	372	Lettuce and chicory	0.0210009	2.2681	6.6993	3.987
2010	84	Greece	372	Lettuce and chicory	16.3289	1665.55	898.092	4.259
2010	255	Belgium	372	Lettuce and chicory	386.087	1544.35	27026.1	2.037
2010	105	Israel	372	Lettuce and chicory	1.93892	257.876	29.0838	0.486
2010	79	Germany	372	Lettuce and chicory	1145.98	1145.98	136372	3.061
2010	11	Austria	372	Lettuce and chicory	7.33697	29.3479	652.99	2.873
2010	112	Jordan	372	Lettuce and chicory	0.0101697	0.325429	0.498313	0.108
2010	162	Norway	372	Lettuce and chicory	0.259992	0.779977	29.3791	55.393
2010	203	Spain	372	Lettuce and chicory	13882.3	1.01341e+06	652466	2.701
2010	216	Thailand	372	Lettuce and chicory	0.0255295	0.331883	5.59095	3.613
2010	212	Syria	372	Lettuce and chicory	0.267009	60.6111	4.27214	0.976
2010	183	Romania	372	Lettuce and chicory	0.542707	9.22602	151.958	4.002
2010	154	NA	372	Lettuce and chicory	0.0156165	NA	NA	NA
2010	3	Albania	372	Lettuce and chicory	0.0382922	0	0	4.4
2010	256	Luxembourg	372	Lettuce and chicory	0.0270997	0	9.64749	1.954
2010	40	Chile	372	Lettuce and chicory	37.8389	12789.5	2800.08	21.914
2010	41	China	372	Lettuce and chicory	0.0740632	0.444379	12.6648	1.508
2010	170	Peru	372	Lettuce and chicory	0.0178464	1.32063	3.2302	7.61
2010	222	Tunisia	372	Lettuce and chicory	25.5995	153.597	1484.77	0.869
2010	173	Poland	372	Lettuce and chicory	6.88707	0	1646.01	3.103
2010	104	Ireland	372	Lettuce and chicory	0.359227	0	29.8158	19.74
2010	167	Czech Republic	372	Lettuce and chicory	2.0081	10.0405	449.814	3.932
2010	121	Lebanon	372	Lettuce and chicory	0.195319	3.51574	14.2583	0.544
2010	134	Malta	372	Lettuce and chicory	0.46543	30.2529	15.8246	NA
2010	97	Hungary	372	Lettuce and chicory	1.64392	14.7953	198.915	4.007
2010	203	Spain	373	Spinach	35.7229	4072.41	2536.33	2.701
2010	174	Portugal	373	Spinach	0.452409	30.7638	38.0024	2.74
2010	150	Netherlands	373	Spinach	7.69613	46.1768	430.983	3.277
2010	223	Turkey	373	Spinach	0.233548	12.1445	27.0915	1.801
2010	41	China	373	Spinach	0.189982	1.13989	21.088	1.508
2010	79	Germany	373	Spinach	1.39215	1.39215	115.548	3.061
2010	50	Cyprus	373	Spinach	0.0288574	4.32861	3.03003	NA
2010	154	NA	373	Spinach	0.0175996	NA	NA	NA
2010	54	Denmark	373	Spinach	0.949789	0	0	7.856
2010	11	Austria	373	Spinach	0.181935	0.545805	12.5535	2.873
2010	106	Italy	373	Spinach	30.6136	857.181	3122.59	2.273
2010	255	Belgium	373	Spinach	3.61743	10.8523	217.046	2.037
2010	68	France	373	Spinach	0.868518	9.5537	64.2703	5.064
2010	231	United States	388	Tomatoes	471.004	34854.3	14601.1	22
2010	9	Argentina	388	Tomatoes	0.307112	10.1347	23.0334	13.678
2010	273	Montenegro	388	Tomatoes	0.023947	NA	NA	4.4
2010	255	Belgium	388	Tomatoes	215.669	0	2372.36	2.037
2010	79	Germany	388	Tomatoes	196.577	982.887	4324.7	3.061
2010	146	Moldova	388	Tomatoes	2.30703	521.389	694.416	4.089
2010	131	Malaysia	388	Tomatoes	0.0174659	0.558908	3.98222	25.815
2010	222	Tunisia	388	Tomatoes	14.6805	704.662	880.828	0.869
2010	33	Canada	388	Tomatoes	3.2762	0	163.81	110.909
2010	150	Netherlands	388	Tomatoes	9288.71	0	65021	3.277
2010	229	United Kingdom	388	Tomatoes	17.567	17.567	158.103	5.868
2010	1	Armenia	388	Tomatoes	0.0318415	3.98019	2.4518	1.896
2010	59	Egypt	388	Tomatoes	34.9659	5174.95	874.148	1.681
2010	4	Algeria	388	Tomatoes	0.135154	8.92018	16.3537	0.85
2010	11	Austria	388	Tomatoes	7.88282	47.2969	181.305	2.873
2010	203	Spain	388	Tomatoes	9575.61	220239	335146	2.701
2010	216	Thailand	388	Tomatoes	0.224857	11.4677	35.3026	3.613
2010	198	Slovenia	388	Tomatoes	1.5688	15.688	232.183	4.224
2010	107	Cote d'Ivoire	388	Tomatoes	0.0765716	NA	NA	2.937
2010	165	Pakistan	388	Tomatoes	0.14942	55.2853	17.781	0.594
2010	272	Serbia	388	Tomatoes	2.94791	NA	NA	4.37
2010	143	Morocco	388	Tomatoes	260.04	13262.1	11441.8	0.939
2010	121	Lebanon	388	Tomatoes	0.564742	25.9781	24.2839	0.544
2010	21	Brazil	388	Tomatoes	0.0645092	1.22567	4.38662	16.749
2010	54	Denmark	388	Tomatoes	4.96581	4.96581	49.6581	7.856
2010	103	Iraq	388	Tomatoes	0.0121513	3.19579	1.3488	0.675
2010	44	Colombia	388	Tomatoes	0.0924678	0.924678	17.2915	9.648
2010	84	Greece	388	Tomatoes	6889	158447	289338	4.259
2010	174	Portugal	388	Tomatoes	4644.04	74304.6	190406	2.74
2010	52	Azerbaijan	388	Tomatoes	0.031956	6.9664	3.35537	1.916
2010	102	Iran	388	Tomatoes	0.909544	NA	NA	0.976
2010	158	Niger	388	Tomatoes	1.8565	228.35	63.1211	1.614
2010	103	Iraq	388	Tomatoes	0.0121513	3.19579	1.3488	0.675
2010	40	Chile	388	Tomatoes	15.7041	62.8166	533.941	21.914
2010	103	Iraq	388	Tomatoes	0.0121513	3.19579	1.3488	0.675
2010	210	Sweden	388	Tomatoes	22.0722	44.1444	198.65	20.223
2010	162	Norway	388	Tomatoes	0.0965137	0.193027	0.965137	55.393
2010	215	Tanzania	388	Tomatoes	0.0133307	NA	NA	2.006
2010	185	Russia	388	Tomatoes	1.61464	64.5855	468.245	12.681
2010	57	Belarus	388	Tomatoes	0.0155455	0.0155455	3.29565	5.092
2010	202	South Africa	388	Tomatoes	1.68521	82.5753	89.3161	2.449
2010	68	France	388	Tomatoes	423.467	4658.14	12280.6	5.064
2010	63	Estonia	388	Tomatoes	7.85323	7.85323	840.295	8.345
2010	3	Albania	388	Tomatoes	3.12891	337.922	303.504	4.4
2010	173	Poland	388	Tomatoes	287.333	861.999	48846.6	3.103
2010	106	Italy	388	Tomatoes	20110.6	623428	1.30719e+06	2.273
2010	89	Guatemala	388	Tomatoes	0.183191	3.847	25.0971	4.459
2010	225	United Arab Emirates	388	Tomatoes	0.0663202	2.52017	3.44865	0.37
2010	221	Oman	388	Tomatoes	5.09978	662.971	214.191	0.707
2010	27	Bulgaria	388	Tomatoes	7.32037	314.776	1434.79	4.006
2010	236	Venezuela	388	Tomatoes	0.0122302	NA	NA	17.1
2010	110	Japan	388	Tomatoes	1.05849	0	77.2701	3.555
2010	230	Ukraine	388	Tomatoes	10.4429	323.729	3310.39	4.3
2010	235	Uzbekistan	388	Tomatoes	0.0634827	18.9178	3.99941	1.147
2010	194	Saudi Arabia	388	Tomatoes	0.0899644	25.0101	5.66775	0.479
2010	41	China	388	Tomatoes	6334.02	19002.1	1.15279e+06	1.508
2010	117	South Korea	388	Tomatoes	0.0434251	NA	NA	1.14
2010	105	Israel	388	Tomatoes	1329.16	34558.1	33228.9	0.486
2010	199	Slovak Republic	388	Tomatoes	2.66552	199.914	463.801	3.987
2010	183	Romania	388	Tomatoes	2.2321	58.0345	522.311	4.002
2010	195	Senegal	388	Tomatoes	27.4436	4226.31	850.751	1.544
2010	104	Ireland	388	Tomatoes	7.45901	0	89.5082	19.74
2010	112	Jordan	388	Tomatoes	3.07524	264.471	129.16	0.108
2010	103	Iraq	388	Tomatoes	0.0121513	3.19579	1.3488	0.675
2010	98	Croatia	388	Tomatoes	0.181757	0.908785	67.7954	4.398
2010	119	Latvia	388	Tomatoes	0.799559	0.799559	283.844	8.345
2010	212	Syria	388	Tomatoes	2.10595	107.403	105.297	0.976
2010	167	Czech Republic	388	Tomatoes	0.398969	11.1711	81.7886	3.932
2010	170	Peru	388	Tomatoes	0.0166078	1.0629	1.56114	7.61
2010	48	Costa Rica	388	Tomatoes	0.0190371	0.780523	1.71334	4.51
2010	56	Dominican Republic	388	Tomatoes	0.686511	5.49209	79.6353	1.03
2010	223	Turkey	388	Tomatoes	536.826	30062.3	32209.6	1.801
2010	126	Lithuania	388	Tomatoes	0.725451	5.07816	339.511	8.15
2010	97	Hungary	388	Tomatoes	150.202	4355.87	16071.7	4.007
2010	138	Mexico	388	Tomatoes	50.1359	4261.55	3058.29	4.236
2010	211	Switzerland	388	Tomatoes	3.41823	0	109.383	1.642
2010	134	Malta	388	Tomatoes	0.0497112	1.3422	2.18729	NA
2010	100	India	388	Tomatoes	0.579341	33.6018	72.997	0.881
2010	80	Bosnia and Herzegovina	388	Tomatoes	0.0225521	0.563802	11.1182	4.4
2010	154	NA	388	Tomatoes	30.6049	NA	NA	NA
2010	299	NA	388	Tomatoes	1.30923	48.4417	41.8955	NA
2010	137	Mauritius	388	Tomatoes	0.0251686	0.0251686	9.3124	NA
2010	10	Australia	388	Tomatoes	0.128408	8.98855	4.75109	53.268
2010	50	Cyprus	388	Tomatoes	8.12049	219.253	170.53	NA
2010	68	France	393	Cauliflowers and broccoli	314.819	9444.58	64223.2	5.064
2010	255	Belgium	393	Cauliflowers and broccoli	43.4534	304.174	7604.34	2.037
2010	173	Poland	393	Cauliflowers and broccoli	18.6018	0	3087.89	3.103
2010	212	Syria	393	Cauliflowers and broccoli	0.0820089	18.206	1.55817	0.976
2010	54	Denmark	393	Cauliflowers and broccoli	4.75543	4.75543	1212.63	7.856
2010	79	Germany	393	Cauliflowers and broccoli	268.999	268.999	32817.9	3.061
2010	211	Switzerland	393	Cauliflowers and broccoli	0.0240694	0.0481389	5.92108	1.642
2010	59	Egypt	393	Cauliflowers and broccoli	0.0479019	8.67024	0.958038	1.681
2010	150	Netherlands	393	Cauliflowers and broccoli	454.992	5004.91	81443.5	3.277
2010	223	Turkey	393	Cauliflowers and broccoli	0.204132	12.6562	17.5553	1.801
2010	121	Lebanon	393	Cauliflowers and broccoli	0.0162981	0.244472	1.23866	0.544
2010	143	Morocco	393	Cauliflowers and broccoli	0.0147996	0.399589	1.28756	0.939
2010	63	Estonia	393	Cauliflowers and broccoli	0.295226	0.295226	154.994	8.345
2010	162	Norway	393	Cauliflowers and broccoli	0.0450961	0.135288	8.2075	55.393
2010	183	Romania	393	Cauliflowers and broccoli	0.0111649	0.145144	2.69074	4.002
2010	97	Hungary	393	Cauliflowers and broccoli	9.51768	114.212	1637.04	4.007
2010	174	Portugal	393	Cauliflowers and broccoli	1.42866	80.0049	114.293	2.74
2010	84	Greece	393	Cauliflowers and broccoli	0.537148	57.4749	33.8403	4.259
2010	58	Ecuador	393	Cauliflowers and broccoli	256.899	313674	546938	2.575
2010	89	Guatemala	393	Cauliflowers and broccoli	1.0024	3.00721	291.699	4.459
2010	41	China	393	Cauliflowers and broccoli	0.460589	2.76354	85.209	1.508
2010	119	Latvia	393	Cauliflowers and broccoli	0.0162552	0	6.37202	8.345
2010	104	Ireland	393	Cauliflowers and broccoli	0.0875626	0.0875626	26.2688	19.74
2010	106	Italy	393	Cauliflowers and broccoli	183.32	6599.51	25481.4	2.273
2010	199	Slovak Republic	393	Cauliflowers and broccoli	0.109321	8.19909	28.2049	3.987
2010	10	Australia	393	Cauliflowers and broccoli	0.0191823	0.805655	2.64715	53.268
2010	11	Austria	393	Cauliflowers and broccoli	0.366038	1.83019	47.2189	2.873
2010	203	Spain	393	Cauliflowers and broccoli	891.763	92743.4	65990.5	2.701
2010	210	Sweden	393	Cauliflowers and broccoli	104.814	209.628	15198.1	20.223
2010	114	Kenya	393	Cauliflowers and broccoli	0.4151	1.6604	58.5291	1.018
2010	230	Ukraine	393	Cauliflowers and broccoli	0.0373232	0.522525	13.2871	4.3
2010	229	United Kingdom	393	Cauliflowers and broccoli	3.19164	28.7248	721.311	5.868
2010	231	United States	393	Cauliflowers and broccoli	0.0173305	1.4211	2.79021	22
2010	167	Czech Republic	393	Cauliflowers and broccoli	0.382212	1.52885	79.5001	3.932
2010	112	Jordan	394	Pumpkins, squash and gourds	0.413439	11.1629	43.4111	0.108
2010	203	Spain	394	Pumpkins, squash and gourds	1947.86	64279.4	97393.1	2.701
2010	212	Syria	394	Pumpkins, squash and gourds	0.122846	35.7482	10.4419	0.976
2010	170	Peru	394	Pumpkins, squash and gourds	0.935624	19.6481	130.052	7.61
2010	255	Belgium	394	Pumpkins, squash and gourds	51.9118	0	0	2.037
2010	105	Israel	394	Pumpkins, squash and gourds	1.25472	96.6131	38.8962	0.486
2010	106	Italy	394	Pumpkins, squash and gourds	39.4182	670.109	3665.89	2.273
2010	222	Tunisia	394	Pumpkins, squash and gourds	0.0116688	0.0233376	1.78532	0.869
2010	27	Bulgaria	394	Pumpkins, squash and gourds	0.017824	0.285183	5.25807	4.006
2010	121	Lebanon	394	Pumpkins, squash and gourds	0.0247342	0.123671	1.92927	0.544
2010	54	Denmark	394	Pumpkins, squash and gourds	0.145824	0	8.74945	7.856
2010	11	Austria	394	Pumpkins, squash and gourds	3.52965	3.52965	222.368	2.873
2010	199	Slovak Republic	394	Pumpkins, squash and gourds	0.0176806	0.56578	4.24335	3.987
2010	174	Portugal	394	Pumpkins, squash and gourds	13.5648	542.59	1451.43	2.74
2010	223	Turkey	394	Pumpkins, squash and gourds	3.00374	129.161	429.534	1.801
2010	97	Hungary	394	Pumpkins, squash and gourds	10.6838	42.7352	1356.84	4.007
2010	202	South Africa	394	Pumpkins, squash and gourds	0.937425	87.1805	148.113	2.449
2010	68	France	394	Pumpkins, squash and gourds	7.01499	35.075	462.989	5.064
2010	119	Latvia	394	Pumpkins, squash and gourds	0.0154303	0	2.85461	8.345
2010	3	Albania	394	Pumpkins, squash and gourds	0.0340527	2.41774	4.56306	4.4
2010	84	Greece	394	Pumpkins, squash and gourds	2.86441	194.78	243.475	4.259
2010	156	New Zealand	394	Pumpkins, squash and gourds	1.47186	20.606	229.61	58.852
2010	173	Poland	394	Pumpkins, squash and gourds	0.67697	0	111.7	3.103
2010	59	Egypt	394	Pumpkins, squash and gourds	0.0245652	4.51999	1.49848	1.681
2010	143	Morocco	394	Pumpkins, squash and gourds	42.7874	299.512	3722.51	0.939
2010	150	Netherlands	394	Pumpkins, squash and gourds	342.416	342.416	14039	3.277
2010	79	Germany	394	Pumpkins, squash and gourds	87.2939	0	0	3.061
2010	167	Czech Republic	397	Cucumbers and gherkins	2.27671	38.7041	587.391	3.932
2010	3	Albania	397	Cucumbers and gherkins	0.122881	9.58468	10.6906	4.4
2010	121	Lebanon	397	Cucumbers and gherkins	0.0735291	5.36763	2.13235	0.544
2010	198	Slovenia	397	Cucumbers and gherkins	0.271025	0.542051	46.6164	4.224
2010	126	Lithuania	397	Cucumbers and gherkins	0.146704	0.293407	55.454	8.15
2010	63	Estonia	397	Cucumbers and gherkins	8.78754	0	852.391	8.345
2010	50	Cyprus	397	Cucumbers and gherkins	0.108421	5.31263	2.27684	NA
2010	173	Poland	397	Cucumbers and gherkins	15.5604	15.5604	3205.44	3.103
2010	84	Greece	397	Cucumbers and gherkins	64.8773	1557.06	1686.81	4.259
2010	138	Mexico	397	Cucumbers and gherkins	0.120075	3.72232	8.40524	4.236
2010	119	Latvia	397	Cucumbers and gherkins	0.427124	0.427124	166.578	8.345
2010	58	Ecuador	397	Cucumbers and gherkins	0.469396	39.4292	131.431	2.575
2010	255	Belgium	397	Cucumbers and gherkins	43.8506	43.8506	789.311	2.037
2010	210	Sweden	397	Cucumbers and gherkins	277.218	554.437	8039.33	20.223
2010	97	Hungary	397	Cucumbers and gherkins	4.6752	88.8289	500.247	4.007
2010	106	Italy	397	Cucumbers and gherkins	5.2366	178.044	560.316	2.273
2010	199	Slovak Republic	397	Cucumbers and gherkins	0.41788	28.4159	116.171	3.987
2010	105	Israel	397	Cucumbers and gherkins	0.240889	9.15379	4.81779	0.486
2010	203	Spain	397	Cucumbers and gherkins	5664.17	181254	181254	2.701
2010	143	Morocco	397	Cucumbers and gherkins	6.5357	405.213	254.892	0.939
2010	27	Bulgaria	397	Cucumbers and gherkins	13.2431	357.563	2304.3	4.006
2010	211	Switzerland	397	Cucumbers and gherkins	0.0454169	0	1.54418	1.642
2010	150	Netherlands	397	Cucumbers and gherkins	3233.76	0	12935	3.277
2010	104	Ireland	397	Cucumbers and gherkins	0.0139898	0	0.321766	19.74
2010	68	France	397	Cucumbers and gherkins	9.76186	48.8093	234.285	5.064
2010	231	United States	397	Cucumbers and gherkins	0.0670232	9.51729	12.4663	22
2010	59	Egypt	397	Cucumbers and gherkins	1.06863	218.001	66.2552	1.681
2010	102	Iran	397	Cucumbers and gherkins	0.0276133	NA	NA	0.976
2010	11	Austria	397	Cucumbers and gherkins	17.0439	187.483	766.977	2.873
2010	54	Denmark	397	Cucumbers and gherkins	0.664809	0	7.97771	7.856
2010	212	Syria	397	Cucumbers and gherkins	0.145764	36.1495	14.5764	0.976
2010	79	Germany	397	Cucumbers and gherkins	886.28	4431.4	54063.1	3.061
2010	112	Jordan	397	Cucumbers and gherkins	1.798	71.9199	28.768	0.108
2010	80	Bosnia and Herzegovina	397	Cucumbers and gherkins	0.267653	4.81775	123.388	4.4
2010	223	Turkey	397	Cucumbers and gherkins	38.6222	2124.22	2935.28	1.801
2010	56	Dominican Republic	397	Cucumbers and gherkins	0.0599578	0.179873	25.1223	1.03
2010	272	Serbia	397	Cucumbers and gherkins	0.0904553	NA	NA	4.37
2010	229	United Kingdom	397	Cucumbers and gherkins	1.30296	0	7.81775	5.868
2010	134	Malta	397	Cucumbers and gherkins	0.0767239	0	0	NA
2010	154	NA	397	Cucumbers and gherkins	2.27388	NA	NA	NA
2010	183	Romania	397	Cucumbers and gherkins	1.05361	15.8041	201.239	4.002
2010	174	Portugal	397	Cucumbers and gherkins	1.13985	61.5518	109.425	2.74
2010	112	Jordan	399	Eggplants (aubergines)	0.0363186	3.30499	2.57862	0.108
2010	194	Saudi Arabia	399	Eggplants (aubergines)	1.20754	403.319	85.7355	0.479
2010	68	France	399	Eggplants (aubergines)	0.644713	16.1178	51.5771	5.064
2010	203	Spain	399	Eggplants (aubergines)	344.221	37520	17211	2.701
2010	255	Belgium	399	Eggplants (aubergines)	5.18198	5.18198	331.647	2.037
2010	3	Albania	399	Eggplants (aubergines)	0.0158972	1.41485	2.35279	4.4
2010	97	Hungary	399	Eggplants (aubergines)	0.0233012	0.209711	4.24082	4.007
2010	105	Israel	399	Eggplants (aubergines)	0.942928	60.3474	14.1439	0.486
2010	81	Ghana	399	Eggplants (aubergines)	0.465992	2.79595	425.916	2.981
2010	143	Morocco	399	Eggplants (aubergines)	0.017855	0.339244	2.23187	0.939
2010	222	Tunisia	399	Eggplants (aubergines)	0.0185883	0.0929415	2.47224	0.869
2010	11	Austria	399	Eggplants (aubergines)	0.265833	0.265833	29.2417	2.873
2010	183	Romania	399	Eggplants (aubergines)	0.0149073	0	2.6684	4.002
2010	59	Egypt	399	Eggplants (aubergines)	0.0230329	6.65652	0.875252	1.681
2010	216	Thailand	399	Eggplants (aubergines)	1.31851	48.7849	1036.35	3.613
2010	174	Portugal	399	Eggplants (aubergines)	0.15176	19.1217	15.6312	2.74
2010	138	Mexico	399	Eggplants (aubergines)	2.64824	92.6884	312.492	4.236
2010	56	Dominican Republic	399	Eggplants (aubergines)	0.544206	17.4146	376.046	1.03
2010	95	Honduras	399	Eggplants (aubergines)	0.232451	2.78942	118.783	4.51
2010	231	United States	399	Eggplants (aubergines)	2.99984	278.985	251.987	22
2010	32	Cameroon	399	Eggplants (aubergines)	0.0356261	0.178131	39.8656	4.848
2010	154	NA	399	Eggplants (aubergines)	0.01727	NA	NA	NA
2010	150	Netherlands	399	Eggplants (aubergines)	407.927	0	2855.49	3.277
2010	106	Italy	399	Eggplants (aubergines)	5.65718	260.23	594.004	2.273
2010	223	Turkey	399	Eggplants (aubergines)	2.17795	165.525	178.592	1.801
2010	100	India	399	Eggplants (aubergines)	0.0587804	1.17561	17.1639	0.881
2010	121	Lebanon	399	Eggplants (aubergines)	0.0153959	1.03153	1.47801	0.544
2010	84	Greece	399	Eggplants (aubergines)	0.389042	63.8029	26.8439	4.259
2010	299	NA	401	Chillies and peppers, green	0.335988	7.05575	20.1593	NA
2010	112	Jordan	401	Chillies and peppers, green	1.522	53.2701	124.804	0.108
2010	105	Israel	401	Chillies and peppers, green	696.197	6961.97	35506.1	0.486
2010	84	Greece	401	Chillies and peppers, green	20.225	20.225	970.801	4.259
2010	89	Guatemala	401	Chillies and peppers, green	0.36578	29.6282	49.746	4.459
2010	223	Turkey	401	Chillies and peppers, green	24.8811	2289.06	2512.99	1.801
2010	68	France	401	Chillies and peppers, green	3.63314	101.728	312.45	5.064
2010	50	Cyprus	401	Chillies and peppers, green	0.0322975	0.322975	2.32542	NA
2010	143	Morocco	401	Chillies and peppers, green	188.024	2820.36	14665.9	0.939
2010	81	Ghana	401	Chillies and peppers, green	0.874077	52.4446	444.905	2.981
2010	222	Tunisia	401	Chillies and peppers, green	0.0178866	0.125206	2.80819	0.869
2010	166	Panama	401	Chillies and peppers, green	0.0825127	1.23769	21.3708	4.505
2010	32	Cameroon	401	Chillies and peppers, green	0.0167214	3.06002	19.9487	4.848
2010	203	Spain	401	Chillies and peppers, green	5580.32	16741	217633	2.701
2010	181	Zimbabwe	401	Chillies and peppers, green	0.95244	0	0	1.66
2010	114	Kenya	401	Chillies and peppers, green	2.71951	236.598	1707.86	1.018
2010	183	Romania	401	Chillies and peppers, green	0.0986537	3.05827	27.3271	4.002
2010	138	Mexico	401	Chillies and peppers, green	1.4114	115.735	182.071	4.236
2010	216	Thailand	401	Chillies and peppers, green	3.52942	264.707	564.707	3.613
2010	212	Syria	401	Chillies and peppers, green	0.042539	1.10601	5.10468	0.976
2010	56	Dominican Republic	401	Chillies and peppers, green	1.72382	22.4097	980.855	1.03
2010	104	Ireland	401	Chillies and peppers, green	0.0308782	0	0	19.74
2010	154	NA	401	Chillies and peppers, green	7.10234	NA	NA	NA
2010	272	Serbia	401	Chillies and peppers, green	2.28585	NA	NA	4.37
2010	19	Bolivia	401	Chillies and peppers, green	0.0127455	5.21289	29.9646	11.75
2010	80	Bosnia and Herzegovina	401	Chillies and peppers, green	0.121101	2.66421	48.5614	4.4
2010	150	Netherlands	401	Chillies and peppers, green	5652.57	0	62178.3	3.277
2010	202	South Africa	401	Chillies and peppers, green	0.244831	0	0	2.449
2010	101	Indonesia	401	Chillies and peppers, green	0.0122651	0.159446	12.3019	16.287
2010	129	Madagascar	401	Chillies and peppers, green	0.0115424	0	0	5.758
2010	100	India	401	Chillies and peppers, green	0.444684	30.2385	80.4878	0.881
2010	231	United States	401	Chillies and peppers, green	0.732017	71.0057	69.5416	22
2010	98	Croatia	401	Chillies and peppers, green	0.1945	1.3615	84.6073	4.398
2010	59	Egypt	401	Chillies and peppers, green	11.7206	1910.46	961.09	1.681
2010	48	Costa Rica	401	Chillies and peppers, green	0.240927	0	0	4.51
2010	79	Germany	401	Chillies and peppers, green	6.93002	0	0	3.061
2010	230	Ukraine	401	Chillies and peppers, green	0.834755	30.8859	308.025	4.3
2010	170	Peru	401	Chillies and peppers, green	0.476692	120.126	196.397	7.61
2010	174	Portugal	401	Chillies and peppers, green	3.06681	3.06681	1076.45	2.74
2010	9	Argentina	401	Chillies and peppers, green	0.334881	43.8695	83.3855	13.678
2010	95	Honduras	401	Chillies and peppers, green	0.0574982	2.12743	30.4166	4.51
2010	106	Italy	401	Chillies and peppers, green	26.0893	1356.64	2974.18	2.273
2010	27	Bulgaria	401	Chillies and peppers, green	1.251	67.5541	300.241	4.006
2010	41	China	401	Chillies and peppers, green	0.552315	2.20926	118.748	1.508
2010	255	Belgium	401	Chillies and peppers, green	90.8558	272.567	7086.75	2.037
2010	167	Czech Republic	401	Chillies and peppers, green	0.378313	8.70121	70.7446	3.932
2010	131	Malaysia	401	Chillies and peppers, green	0.0183985	0	0	25.815
2010	229	United Kingdom	401	Chillies and peppers, green	4.7633	4.7633	61.9229	5.868
2010	199	Slovak Republic	401	Chillies and peppers, green	0.788297	75.6765	184.462	3.987
2010	11	Austria	401	Chillies and peppers, green	7.31645	234.126	526.784	2.873
2010	33	Canada	401	Chillies and peppers, green	0.0357662	0	5.68682	110.909
2010	97	Hungary	401	Chillies and peppers, green	40.5913	1786.02	6535.2	4.007
2010	198	Slovenia	401	Chillies and peppers, green	4.51854	40.6669	610.003	4.224
2010	238	Ethiopia	401	Chillies and peppers, green	0.102496	NA	NA	0.815
2010	150	Netherlands	402	Onions, shallots, green	79.3062	634.45	5075.6	3.277
2010	223	Turkey	402	Onions, shallots, green	0.0820912	11.739	15.351	1.801
2010	216	Thailand	402	Onions, shallots, green	0.0415873	0	0	3.613
2010	143	Morocco	402	Onions, shallots, green	2.17007	130.204	188.796	0.939
2010	68	France	402	Onions, shallots, green	9.60012	115.201	710.409	5.064
2010	229	United Kingdom	402	Onions, shallots, green	0.0728258	1.38369	22.6488	5.868
2010	203	Spain	402	Onions, shallots, green	0.287675	33.0827	22.151	2.701
2010	79	Germany	402	Onions, shallots, green	1.85188	0	0	3.061
2010	230	Ukraine	402	Onions, shallots, green	0.0818483	1.55512	33.7215	4.3
2010	138	Mexico	402	Onions, shallots, green	0.0412615	3.58975	8.66492	4.236
2010	156	New Zealand	402	Onions, shallots, green	86.441	1383.06	5445.78	58.852
2010	146	Moldova	403	Onions, dry	0.0219706	10.2822	9.77691	4.089
2010	170	Peru	403	Onions, dry	7.53311	971.772	1393.63	7.61
2010	10	Australia	403	Onions, dry	53.4546	8125.1	3795.27	53.268
2010	234	Uruguay	403	Onions, dry	1.6874	202.487	973.627	14.962
2010	138	Mexico	403	Onions, dry	10.5293	1326.69	758.108	4.236
2010	102	Iran	403	Onions, dry	0.0112371	NA	NA	0.976
2010	106	Italy	403	Onions, dry	30.4391	2069.86	4017.96	2.273
2010	210	Sweden	403	Onions, dry	66.667	1933.34	5200.03	20.223
2010	50	Cyprus	403	Onions, dry	0.0113561	0.601876	0.885779	NA
2010	143	Morocco	403	Onions, dry	3.59126	395.039	524.324	0.939
2010	202	South Africa	403	Onions, dry	6.55708	1514.68	1508.13	2.449
2010	158	Niger	403	Onions, dry	1.06619	97.0237	12.7943	1.614
2010	119	Latvia	403	Onions, dry	0.0648973	0.194692	22.13	8.345
2010	223	Turkey	403	Onions, dry	0.758053	66.7087	97.7888	1.801
2010	54	Denmark	403	Onions, dry	43.1163	689.86	4096.05	7.856
2010	154	NA	403	Onions, dry	0.143183	NA	NA	NA
2010	48	Costa Rica	403	Onions, dry	0.0591544	4.31827	9.99709	4.51
2010	9	Argentina	403	Onions, dry	20.8894	2276.94	3154.3	13.678
2010	229	United Kingdom	403	Onions, dry	31.0044	279.039	2263.32	5.868
2010	21	Brazil	403	Onions, dry	0.01745	0.697999	7.03234	16.749
2010	222	Tunisia	403	Onions, dry	0.018344	1.41248	3.46701	0.869
2010	28	Myanmar	403	Onions, dry	0.0250249	2.37737	6.13111	9.429
2010	126	Lithuania	403	Onions, dry	0.386913	3.86913	124.973	8.15
2010	100	India	403	Onions, dry	5.36261	750.765	831.205	0.881
2010	272	Serbia	403	Onions, dry	0.0450436	NA	NA	4.37
2010	89	Guatemala	403	Onions, dry	0.0551295	2.8116	11.6323	4.459
2010	114	Kenya	403	Onions, dry	0.0297098	1.63404	11.2303	1.018
2010	203	Spain	403	Onions, dry	261.632	8633.85	15959.5	2.701
2010	167	Czech Republic	403	Onions, dry	0.140646	5.76647	31.7859	3.932
2010	41	China	403	Onions, dry	2.79895	22.3916	615.769	1.508
2010	101	Indonesia	403	Onions, dry	0.0235416	0.400207	22.7647	16.287
2010	33	Canada	403	Onions, dry	1.23636	0	106.327	110.909
2010	174	Portugal	403	Onions, dry	0.575697	9.78685	80.5976	2.74
2010	59	Egypt	403	Onions, dry	54.3165	12547.1	2064.03	1.681
2010	183	Romania	403	Onions, dry	0.0988936	4.94468	31.4482	4.002
2010	11	Austria	403	Onions, dry	3.39211	162.821	267.977	2.873
2010	194	Saudi Arabia	403	Onions, dry	0.354239	140.633	21.9628	0.479
2010	150	Netherlands	403	Onions, dry	4047.32	20236.6	275218	3.277
2010	121	Lebanon	403	Onions, dry	0.0741892	3.56108	9.34783	0.544
2010	129	Madagascar	403	Onions, dry	0.560211	21.8482	481.781	5.758
2010	84	Greece	403	Onions, dry	0.433927	10.4143	42.0909	4.259
2010	134	Malta	403	Onions, dry	1.37903	81.3627	250.983	NA
2010	173	Poland	403	Onions, dry	90.0563	450.282	13508.4	3.103
2010	165	Pakistan	403	Onions, dry	1.18505	411.211	95.9888	0.594
2010	198	Slovenia	403	Onions, dry	0.110702	3.54247	21.919	4.224
2010	255	Belgium	403	Onions, dry	11.95	95.6003	1326.45	2.037
2010	216	Thailand	403	Onions, dry	0.0805686	13.2938	18.2085	3.613
2010	79	Germany	403	Onions, dry	853.42	23042.3	75954.4	3.061
2010	63	Estonia	403	Onions, dry	0.225489	2.93136	120.637	8.345
2010	68	France	403	Onions, dry	88.9107	3289.7	8090.88	5.064
2010	97	Hungary	403	Onions, dry	0.600129	30.6066	75.6163	4.007
2010	249	Yemen	403	Onions, dry	0.306408	119.193	40.4459	0.408
2010	40	Chile	403	Onions, dry	43.418	955.195	2995.84	21.914
2010	124	Libya	403	Onions, dry	0.0193414	4.62259	2.08887	1.143
2010	231	United States	403	Onions, dry	130.901	9686.68	6937.75	22
2010	104	Ireland	403	Onions, dry	0.0691628	0.0691628	5.60219	19.74
2010	199	Slovak Republic	403	Onions, dry	0.0392439	7.10314	12.0086	3.987
2010	195	Senegal	403	Onions, dry	0.0176548	2.64822	0.741502	1.544
2010	138	Mexico	406	Garlic	7.33895	3486	1254.96	4.236
2010	126	Lithuania	406	Garlic	0.421807	5.48348	172.097	8.15
2010	11	Austria	406	Garlic	0.0338481	0	6.2619	2.873
2010	27	Bulgaria	406	Garlic	0.0101208	2.22657	8.05614	4.006
2010	183	Romania	406	Garlic	7.38666	672.186	4180.85	4.002
2010	21	Brazil	406	Garlic	0.0212179	2.52493	20.6875	16.749
2010	167	Czech Republic	406	Garlic	0.0101048	0.0808385	3.39522	3.932
2010	84	Greece	406	Garlic	1.1795	102.616	371.542	4.259
2010	40	Chile	406	Garlic	3.96746	3788.93	1043.44	21.914
2010	63	Estonia	406	Garlic	5.3941	134.853	5733.93	8.345
2010	203	Spain	406	Garlic	221.289	41602.3	70148.6	2.701
2010	9	Argentina	406	Garlic	73.7999	23099.4	26567.9	13.678
2010	119	Latvia	406	Garlic	0.563832	5.07449	570.598	8.345
2010	198	Slovenia	406	Garlic	0.111881	9.84549	62.3175	4.224
2010	41	China	406	Garlic	440.72	4847.92	134860	1.508
2010	143	Morocco	406	Garlic	0.119901	49.3994	57.9124	0.939
2010	80	Bosnia and Herzegovina	406	Garlic	0.114758	0.229516	64.8382	4.4
2010	231	United States	406	Garlic	0.738643	137.388	85.6826	22
2010	199	Slovak Republic	406	Garlic	0.124847	50.5629	83.023	3.987
2010	134	Malta	406	Garlic	0.154534	26.1163	74.7945	NA
2010	100	India	406	Garlic	0.0106543	3.9421	3.92079	0.881
2010	106	Italy	406	Garlic	9.00229	126.032	2295.58	2.273
2010	97	Hungary	406	Garlic	23.1075	3650.99	8734.64	4.007
2010	59	Egypt	406	Garlic	16.2407	4661.07	535.942	1.681
2010	68	France	406	Garlic	7.36506	66.2856	1988.57	5.064
2010	181	Zimbabwe	406	Garlic	0.131691	0	0	1.66
2010	223	Turkey	406	Garlic	0.32547	87.226	122.702	1.801
2010	170	Peru	406	Garlic	0.283273	131.439	151.835	7.61
2010	174	Portugal	406	Garlic	0.199243	14.5448	114.166	2.74
2010	210	Sweden	407	Leeks, other alliaceous vegetables	8.19065	NA	NA	20.223
2010	150	Netherlands	407	Leeks, other alliaceous vegetables	703.51	NA	NA	3.277
2010	41	China	407	Leeks, other alliaceous vegetables	176.196	NA	NA	1.508
2010	114	Kenya	407	Leeks, other alliaceous vegetables	1.19573	NA	NA	1.018
2010	223	Turkey	407	Leeks, other alliaceous vegetables	2.13229	NA	NA	1.801
2010	255	Belgium	407	Leeks, other alliaceous vegetables	197.416	NA	NA	2.037
2010	173	Poland	407	Leeks, other alliaceous vegetables	15.4294	NA	NA	3.103
2010	54	Denmark	407	Leeks, other alliaceous vegetables	9.97188	NA	NA	7.856
2010	68	France	407	Leeks, other alliaceous vegetables	87.7443	NA	NA	5.064
2010	143	Morocco	407	Leeks, other alliaceous vegetables	0.14429	NA	NA	0.939
2010	238	Ethiopia	407	Leeks, other alliaceous vegetables	0.219541	NA	NA	0.815
2010	203	Spain	407	Leeks, other alliaceous vegetables	45.6544	NA	NA	2.701
2010	138	Mexico	414	Beans, green	0.0242701	1.72317	5.53357	4.236
2010	129	Madagascar	414	Beans, green	0.0183855	0.073542	16.8044	5.758
2010	173	Poland	414	Beans, green	0.0798671	0	8.70552	3.103
2010	11	Austria	414	Beans, green	0.0182347	0.109408	3.35519	2.873
2010	255	Belgium	414	Beans, green	13.5278	67.6388	1907.41	2.037
2010	212	Syria	414	Beans, green	0.0156358	6.08232	0.859968	0.976
2010	27	Bulgaria	414	Beans, green	0.0548731	2.14005	27.8207	4.006
2010	121	Lebanon	414	Beans, green	0.016481	0.0329619	1.69754	0.544
2010	229	United Kingdom	414	Beans, green	1.58506	9.51034	264.705	5.868
2010	216	Thailand	414	Beans, green	0.0181766	0.508944	12.4146	3.613
2010	59	Egypt	414	Beans, green	4.66698	1236.75	247.35	1.681
2010	238	Ethiopia	414	Beans, green	0.385034	NA	NA	0.815
2010	181	Zimbabwe	414	Beans, green	0.0803061	0	0	1.66
2010	215	Tanzania	414	Beans, green	0.294242	NA	NA	2.006
2010	233	Burkina Faso	414	Beans, green	0.160527	0.160527	40.1318	0.973
2010	41	China	414	Beans, green	0.0318992	0.223294	7.01781	1.508
2010	143	Morocco	414	Beans, green	15.494	325.375	1131.06	0.939
2010	114	Kenya	414	Beans, green	7.37257	51.608	3184.95	1.018
2010	79	Germany	414	Beans, green	1.81148	1.81148	367.73	3.061
2010	203	Spain	414	Beans, green	3.83375	337.37	391.043	2.701
2010	89	Guatemala	414	Beans, green	0.130956	0.261911	43.8701	4.459
2010	97	Hungary	414	Beans, green	2.75263	35.7843	671.643	4.007
2010	223	Turkey	414	Beans, green	0.0338647	2.70918	6.09564	1.801
2010	68	France	414	Beans, green	3.97519	87.4541	695.658	5.064
2010	207	Suriname	414	Beans, green	0.0289911	0	3.94279	121.744
2010	202	South Africa	414	Beans, green	0.022002	5.5005	7.32667	2.449
2010	183	Romania	414	Beans, green	1.52893	27.5207	652.853	4.002
2010	158	Niger	414	Beans, green	0.0388109	2.56152	23.6358	1.614
2010	249	Yemen	414	Beans, green	0.0101448	1.54201	2.13042	0.408
2010	195	Senegal	414	Beans, green	2.00868	88.3818	357.544	1.544
2010	112	Jordan	414	Beans, green	0.0229013	0.709941	2.65655	0.108
2010	231	United States	414	Beans, green	0.0286311	3.83656	9.27646	22
2010	106	Italy	414	Beans, green	0.480703	24.0351	109.6	2.273
2010	150	Netherlands	414	Beans, green	32.3613	258.89	5113.08	3.277
2010	84	Greece	414	Beans, green	0.0298033	3.90424	3.5466	4.259
2010	97	Hungary	417	Peas, green	5.99534	119.907	1870.54	4.007
2010	215	Tanzania	417	Peas, green	0.0215595	NA	NA	2.006
2010	11	Austria	417	Peas, green	0.212922	3.61967	95.176	2.873
2010	216	Thailand	417	Peas, green	0.0303273	3.06306	51.2835	3.613
2010	146	Moldova	417	Peas, green	0.0709304	47.0269	69.7246	4.089
2010	33	Canada	417	Peas, green	0.0354584	0.460959	23.7571	110.909
2010	114	Kenya	417	Peas, green	4.0754	65.2065	2176.27	1.018
2010	255	Belgium	417	Peas, green	10.0072	100.072	2211.6	2.037
2010	68	France	417	Peas, green	9.51965	228.472	1561.22	5.064
2010	238	Ethiopia	417	Peas, green	0.0840911	NA	NA	0.815
2010	230	Ukraine	417	Peas, green	0.0461575	1.66167	48.1423	4.3
2010	170	Peru	417	Peas, green	0.580187	181.018	467.631	7.61
2010	203	Spain	417	Peas, green	0.922851	283.315	233.481	2.701
2010	173	Poland	417	Peas, green	0.0591202	0.0591202	32.1614	3.103
2010	199	Slovak Republic	417	Peas, green	0.0241701	6.35673	22.8407	3.987
2010	181	Zimbabwe	417	Peas, green	1.02618	0	0	1.66
2010	229	United Kingdom	417	Peas, green	1.11842	10.0658	229.277	5.868
2010	150	Netherlands	417	Peas, green	20.5702	246.843	3455.8	3.277
2010	202	South Africa	417	Peas, green	0.181215	80.0971	90.0639	2.449
2010	54	Denmark	417	Peas, green	14.306	42.9179	6351.84	7.856
2010	126	Lithuania	417	Peas, green	0.247495	0.247495	38.8567	8.15
2010	129	Madagascar	417	Peas, green	0.037551	0.976327	156.325	5.758
2010	183	Romania	417	Peas, green	1.42751	45.6803	946.44	4.002
2010	41	China	417	Peas, green	0.215912	2.80685	82.9102	1.508
2010	59	Egypt	417	Peas, green	0.581501	272.724	43.6126	1.681
2010	63	Estonia	417	Peas, green	0.579689	1.15938	851.563	8.345
2010	185	Russia	417	Peas, green	2.2716	52.2468	1381.13	12.681
2010	89	Guatemala	417	Peas, green	1.78673	5.36018	943.392	4.459
2010	106	Italy	417	Peas, green	33.7751	3242.41	12935.9	2.273
2010	79	Germany	417	Peas, green	37.0588	74.1177	9857.65	3.061
2010	167	Czech Republic	417	Peas, green	0.154151	1.84981	101.585	3.932
2010	210	Sweden	417	Peas, green	48.385	290.31	21483	20.223
2010	211	Switzerland	426	Carrots and turnips	0.0255916	0	1.15162	1.642
2010	126	Lithuania	426	Carrots and turnips	0.0662168	0	5.89329	8.15
2010	79	Germany	426	Carrots and turnips	237.096	3556.43	15648.3	3.061
2010	185	Russia	426	Carrots and turnips	0.0474908	0.0949816	3.79926	12.681
2010	173	Poland	426	Carrots and turnips	1.93177	0	106.247	3.103
2010	229	United Kingdom	426	Carrots and turnips	6.25971	0	169.012	5.868
2010	167	Czech Republic	426	Carrots and turnips	0.105094	2.10187	14.8182	3.932
2010	84	Greece	426	Carrots and turnips	0.0351245	3.89882	2.45871	4.259
2010	174	Portugal	426	Carrots and turnips	4.04915	287.489	348.227	2.74
2010	104	Ireland	426	Carrots and turnips	0.0630852	0.0630852	4.92064	19.74
2010	63	Estonia	426	Carrots and turnips	63.9448	0	4284.3	8.345
2010	54	Denmark	426	Carrots and turnips	24.1942	193.554	1475.85	7.856
2010	27	Bulgaria	426	Carrots and turnips	0.145461	0.436382	20.9463	4.006
2010	203	Spain	426	Carrots and turnips	527.205	47975.7	29523.5	2.701
2010	41	China	426	Carrots and turnips	1.54945	4.64835	223.121	1.508
2010	68	France	426	Carrots and turnips	41.7017	959.14	3044.23	5.064
2010	33	Canada	426	Carrots and turnips	0.35226	0	19.3743	110.909
2010	97	Hungary	426	Carrots and turnips	2.4957	14.9742	177.194	4.007
2010	223	Turkey	426	Carrots and turnips	0.490076	3.43053	68.6107	1.801
2010	143	Morocco	426	Carrots and turnips	1.73841	351.159	137.334	0.939
2010	198	Slovenia	426	Carrots and turnips	0.238571	0.238571	22.6643	4.224
2010	11	Austria	426	Carrots and turnips	1.35725	43.4321	89.5787	2.873
2010	183	Romania	426	Carrots and turnips	0.0132943	0	1.38261	4.002
2010	105	Israel	426	Carrots and turnips	88.9837	6584.79	2224.59	0.486
2010	255	Belgium	426	Carrots and turnips	85.8871	257.661	4723.79	2.037
2010	199	Slovak Republic	426	Carrots and turnips	0.0465181	0.697771	5.62869	3.987
2010	89	Guatemala	426	Carrots and turnips	0.0318127	0.795317	3.34033	4.459
2010	150	Netherlands	426	Carrots and turnips	3125.43	9376.29	178150	3.277
2010	119	Latvia	426	Carrots and turnips	0.669586	0	66.9586	8.345
2010	210	Sweden	426	Carrots and turnips	37.6229	0	790.08	20.223
2010	138	Mexico	426	Carrots and turnips	0.287181	14.0718	16.6565	4.236
2010	10	Australia	426	Carrots and turnips	0.195445	30.8803	16.8083	53.268
2010	106	Italy	426	Carrots and turnips	877.02	28064.6	62268.4	2.273
2010	202	South Africa	426	Carrots and turnips	0.307164	27.9519	39.317	2.449
2010	231	United States	426	Carrots and turnips	6.97846	139.569	453.6	22
2010	48	Costa Rica	426	Carrots and turnips	0.155013	0	0	4.51
2010	52	Azerbaijan	44	Barley	0.288099	128.78	316.044	1.916
2010	2	Afghanistan	44	Barley	0.0117962	24.2765	16.5028	0.853
2010	138	Mexico	44	Barley	43.0003	37152.3	44634.4	4.236
2010	146	Moldova	44	Barley	9.40507	47.0253	9809.48	4.089
2010	272	Serbia	44	Barley	0.750511	NA	NA	4.37
2010	104	Ireland	44	Barley	883.237	0	253489	19.74
2010	202	South Africa	44	Barley	0.0196207	4.19883	24.0354	2.449
2010	203	Spain	44	Barley	963.867	80964.9	966759	2.701
2010	1	Armenia	44	Barley	0.0711576	24.4071	137.619	1.896
2010	210	Sweden	44	Barley	3242.89	0	1.74143e+06	20.223
2010	185	Russia	44	Barley	2420.02	125841	5.33614e+06	12.681
2010	234	Uruguay	44	Barley	5.20101	0	9559.46	14.962
2010	84	Greece	44	Barley	17.53	0	18389	4.259
2010	231	United States	44	Barley	158.743	35082.3	146996	22
2010	126	Lithuania	44	Barley	2763.87	0	3.60409e+06	8.15
2010	110	Japan	44	Barley	0.0160096	0	7.89274	3.555
2010	117	South Korea	44	Barley	0.0123238	NA	NA	1.14
2010	102	Iran	44	Barley	0.895072	NA	NA	0.976
2010	216	Thailand	44	Barley	0.686942	0	1406.86	3.613
2010	11	Austria	44	Barley	313.106	0	125243	2.873
2010	113	Kyrgyz Republic	44	Barley	0.0168676	0.269881	12.4651	1.352
2010	9	Argentina	44	Barley	7.40574	74.0574	10708.7	13.678
2010	167	Czech Republic	44	Barley	959.539	0	630417	3.932
2010	170	Peru	44	Barley	0.0422497	47.9534	147.832	7.61
2010	150	Netherlands	44	Barley	224.123	0	81356.7	3.277
2010	50	Cyprus	44	Barley	17.2367	551.574	27957.9	NA
2010	33	Canada	44	Barley	114.833	918.664	102087	110.909
2010	230	Ukraine	44	Barley	69.4276	1319.12	97476.4	4.3
2010	198	Slovenia	44	Barley	8.72048	0	8423.99	4.224
2010	106	Italy	44	Barley	76.3085	0	54942.1	2.273
2010	121	Lebanon	44	Barley	0.0410205	0	78.7594	0.544
2010	79	Germany	44	Barley	10560.5	0	5.28025e+06	3.061
2010	256	Luxembourg	44	Barley	19.7592	0	6421.75	1.954
2010	174	Portugal	44	Barley	3.08879	0	7885.67	2.74
2010	68	France	44	Barley	4090.85	16363.4	2.17633e+06	5.064
2010	229	United Kingdom	44	Barley	1176.08	0	397517	5.868
2010	10	Australia	44	Barley	68.0879	0	111596	53.268
2010	255	Belgium	44	Barley	228.917	0	54711.2	2.037
2010	119	Latvia	44	Barley	136.267	0	210532	8.345
2010	57	Belarus	44	Barley	136.619	409.858	190037	5.092
2010	41	China	44	Barley	5.04681	141.311	2806.03	1.508
2010	156	New Zealand	44	Barley	49.1625	0	32152.2	58.852
2010	199	Slovak Republic	44	Barley	172.914	1037.48	175507	3.987
2010	223	Turkey	44	Barley	15.3352	260.698	21990.7	1.801
2010	211	Switzerland	44	Barley	15.8722	0	5983.82	1.642
2010	100	India	44	Barley	0.246963	192.878	307.716	0.881
2010	40	Chile	44	Barley	0.170157	35.9031	111.623	21.914
2010	183	Romania	44	Barley	72.9677	0	56404	4.002
2010	114	Kenya	44	Barley	0.0105317	0	16.619	1.018
2010	59	Egypt	44	Barley	0.0994142	168.507	61.5374	1.681
2010	154	NA	44	Barley	0.301361	NA	NA	NA
2010	143	Morocco	44	Barley	0.237816	0	878.016	0.939
2010	63	Estonia	44	Barley	2731.28	0	4.18705e+06	8.345
2010	194	Saudi Arabia	44	Barley	0.117393	93.914	22.7742	0.479
2010	222	Tunisia	44	Barley	0.108391	8.12933	385.981	0.869
2010	27	Bulgaria	44	Barley	36.797	0	28591.2	4.006
2010	97	Hungary	44	Barley	164.014	164.014	96932.5	4.007
2010	98	Croatia	44	Barley	1.57109	0	983.503	4.398
2010	21	Brazil	44	Barley	0.832164	0	1556.98	16.749
2010	105	Israel	44	Barley	0.0205294	0	62.2655	0.486
2010	162	Norway	44	Barley	34.1689	0	11583.2	55.393
2010	173	Poland	44	Barley	4410.9	0	4.59175e+06	3.103
2010	54	Denmark	44	Barley	11525.2	0	5.08261e+06	7.856
2010	108	Kazakhstan	44	Barley	0.260922	42.2693	739.713	11.614
2010	80	Bosnia and Herzegovina	44	Barley	0.0406441	0	31.4179	4.4
2010	4	Algeria	44	Barley	0.07492	0	214.196	0.85
2010	220	Trinidad and Tobago	446	Maize, green	0.0247032	0	0	15.602
2010	156	New Zealand	446	Maize, green	0.849148	148.601	233.516	58.852
2010	98	Croatia	446	Maize, green	1.21564	0	0	4.398
2010	40	Chile	446	Maize, green	0.377235	115.811	38.8552	21.914
[truncated: 1,954 more rows]

## Sheet: 2009
Year	CountryCode	CountryName	ProductCode	ProductName	Imports	BlueWaterImports	GreenWaterImports	GBScarcity
2009	33	Canada	103	Grain, mixed	0.0287899	0.662168	38.4921	110.909
2009	229	United Kingdom	103	Grain, mixed	8.92162	205.197	7280.04	5.868
2009	54	Denmark	103	Grain, mixed	0.0174481	0	0	7.856
2009	203	Spain	103	Grain, mixed	2.10882	4365.27	3930.85	2.701
2009	223	Turkey	103	Grain, mixed	0.0656887	67.1996	144.909	1.801
2009	126	Lithuania	103	Grain, mixed	7.3756	73.756	16573	8.15
2009	119	Latvia	103	Grain, mixed	463.063	463.063	825178	8.345
2009	84	Greece	103	Grain, mixed	0.146987	220.481	175.65	4.259
2009	210	Sweden	103	Grain, mixed	0.039565	0.356085	42.6907	20.223
2009	255	Belgium	103	Grain, mixed	3.95655	98.9139	3323.51	2.037
2009	256	Luxembourg	103	Grain, mixed	3.47242	0	1996.64	1.954
2009	211	Switzerland	103	Grain, mixed	0.0891433	0.26743	71.6712	1.642
2009	167	Czech Republic	103	Grain, mixed	2.36382	82.7336	5453.33	3.932
2009	173	Poland	103	Grain, mixed	0.368749	0.368749	632.773	3.103
2009	79	Germany	103	Grain, mixed	72.9982	364.991	67085.4	3.061
2009	63	Estonia	103	Grain, mixed	1.17457	2.34914	2526.5	8.345
2009	11	Austria	103	Grain, mixed	0.26829	9.65845	300.753	2.873
2009	68	France	103	Grain, mixed	110.352	12249	105386	5.064
2009	230	Ukraine	108	Cereals, nes	0.41954	15.1035	812.65	4.3
2009	27	Bulgaria	108	Cereals, nes	0.362563	33.7184	721.5	4.006
2009	216	Thailand	108	Cereals, nes	52.2616	2665.34	113251	3.613
2009	173	Poland	108	Cereals, nes	6889	0	8.48725e+06	3.103
2009	20	Botswana	108	Cereals, nes	0.0324561	0.681579	38.6877	7.297
2009	126	Lithuania	108	Cereals, nes	12.706	50.8239	24255.7	8.15
2009	156	New Zealand	108	Cereals, nes	1.15795	0	411.073	58.852
2009	57	Belarus	108	Cereals, nes	648.273	648.273	1.39768e+06	5.092
2009	198	Slovenia	108	Cereals, nes	13.8326	69.1631	12601.5	4.224
2009	222	Tunisia	108	Cereals, nes	0.735357	1967.82	1402.33	0.869
2009	11	Austria	108	Cereals, nes	11262.6	11262.6	2.26378e+06	2.873
2009	138	Mexico	108	Cereals, nes	0.0690387	0	0	4.236
2009	104	Ireland	108	Cereals, nes	31.5801	0	0	19.74
2009	185	Russia	108	Cereals, nes	1.25375	137.913	6139.64	12.681
2009	84	Greece	108	Cereals, nes	1.80278	0	0	4.259
2009	199	Slovak Republic	108	Cereals, nes	20.8836	1670.69	33685.2	3.987
2009	170	Peru	108	Cereals, nes	0.147504	173.612	282.323	7.61
2009	211	Switzerland	108	Cereals, nes	3.37197	0	0	1.642
2009	181	Zimbabwe	108	Cereals, nes	0.0119677	0.311161	1.19677	1.66
2009	256	Luxembourg	108	Cereals, nes	57.4331	0	23203	1.954
2009	167	Czech Republic	108	Cereals, nes	311.576	2492.61	279795	3.932
2009	106	Italy	108	Cereals, nes	50.4338	4639.91	31773.3	2.273
2009	183	Romania	108	Cereals, nes	0.584206	19.863	775.826	4.002
2009	9	Argentina	108	Cereals, nes	8.13233	1293.04	14475.5	13.678
2009	97	Hungary	108	Cereals, nes	190.175	11600.7	399558	4.007
2009	41	China	108	Cereals, nes	0.650822	11.7148	807.67	1.508
2009	202	South Africa	108	Cereals, nes	0.355188	457.128	534.203	2.449
2009	272	Serbia	108	Cereals, nes	0.989457	NA	NA	4.37
2009	215	Tanzania	108	Cereals, nes	0.028653	NA	NA	2.006
2009	79	Germany	116	Potatoes	6105.93	48847.4	512898	3.061
2009	183	Romania	116	Potatoes	17.3911	104.347	4626.04	4.002
2009	234	Uruguay	116	Potatoes	4.05228	162.091	940.128	14.962
2009	150	Netherlands	116	Potatoes	25421.5	76264.6	1.93204e+06	3.277
2009	68	France	116	Potatoes	2107.62	33721.9	166502	5.064
2009	231	United States	116	Potatoes	111.342	9909.4	5455.73	22
2009	105	Israel	116	Potatoes	307.823	31705.8	13544.2	0.486
2009	10	Australia	116	Potatoes	2.05409	203.355	104.758	53.268
2009	57	Belarus	116	Potatoes	18.5147	18.5147	4073.23	5.092
2009	41	China	116	Potatoes	1.5547	10.8829	334.261	1.508
2009	98	Croatia	116	Potatoes	0.503106	2.01242	216.335	4.398
2009	4	Algeria	116	Potatoes	0.100907	20.585	6.25623	0.85
2009	121	Lebanon	116	Potatoes	0.11239	33.7169	2.69736	0.544
2009	58	Ecuador	116	Potatoes	0.167444	36.8378	50.7356	2.575
2009	89	Guatemala	116	Potatoes	0.0562244	0	8.93968	4.459
2009	199	Slovak Republic	116	Potatoes	2.1426	25.7112	520.651	3.987
2009	174	Portugal	116	Potatoes	24.3552	4749.27	5017.18	2.74
2009	9	Argentina	116	Potatoes	0.521192	26.5808	75.5728	13.678
2009	80	Bosnia and Herzegovina	116	Potatoes	0.077204	0.617632	36.0543	4.4
2009	212	Syria	116	Potatoes	0.054298	7.33024	2.17192	0.976
2009	50	Cyprus	116	Potatoes	310.553	17701.5	20807.1	NA
2009	223	Turkey	116	Potatoes	1.37191	104.265	78.1991	1.801
2009	146	Moldova	116	Potatoes	0.0140353	2.96145	5.74043	4.089
2009	59	Egypt	116	Potatoes	68.875	19904.9	1446.38	1.681
2009	21	Brazil	116	Potatoes	0.132302	3.04294	28.7095	16.749
2009	134	Malta	116	Potatoes	1.92355	230.826	126.954	NA
2009	230	Ukraine	116	Potatoes	1.50803	6.03213	503.683	4.3
2009	229	United Kingdom	116	Potatoes	94.5065	1228.58	6237.43	5.868
2009	84	Greece	116	Potatoes	15.5496	1492.77	1337.27	4.259
2009	237	Vietnam	116	Potatoes	0.0381347	0	18.3809	3.809
2009	203	Spain	116	Potatoes	523.91	40341.1	47151.9	2.701
2009	185	Russia	116	Potatoes	1.53649	3.07298	457.874	12.681
2009	95	Honduras	116	Potatoes	0.0889293	0	31.3921	4.51
2009	126	Lithuania	116	Potatoes	451.093	0	95180.6	8.15
2009	112	Jordan	116	Potatoes	0.0133839	1.90052	0.347982	0.108
2009	63	Estonia	116	Potatoes	213.599	0	42292.5	8.345
2009	216	Thailand	116	Potatoes	0.0342516	0	13.0499	3.613
2009	27	Bulgaria	116	Potatoes	0.592599	8.29638	173.631	4.006
2009	167	Czech Republic	116	Potatoes	12.7439	25.4878	1860.61	3.932
2009	154	NA	116	Potatoes	0.0862787	NA	NA	NA
2009	40	Chile	116	Potatoes	0.59202	62.1621	52.6898	21.914
2009	119	Latvia	116	Potatoes	185.997	0	40919.4	8.345
2009	110	Japan	116	Potatoes	0.134679	0.269357	14.68	3.555
2009	255	Belgium	116	Potatoes	5353.99	0	428319	2.037
2009	56	Dominican Republic	116	Potatoes	0.0682484	0	11.4657	1.03
2009	11	Austria	116	Potatoes	49.2833	739.249	5618.3	2.873
2009	143	Morocco	116	Potatoes	8.93639	285.964	1197.48	0.939
2009	156	New Zealand	116	Potatoes	4.54868	0	363.894	58.852
2009	202	South Africa	116	Potatoes	0.374567	25.4705	33.711	2.449
2009	211	Switzerland	116	Potatoes	30.8827	0	3026.51	1.642
2009	162	Norway	116	Potatoes	2.93404	44.0106	372.623	55.393
2009	173	Poland	116	Potatoes	4517.28	4517.28	867318	3.103
2009	106	Italy	116	Potatoes	347.251	15973.6	44795.4	2.273
2009	138	Mexico	116	Potatoes	0.0758788	8.49842	10.4713	4.236
2009	117	South Korea	116	Potatoes	0.0247668	NA	NA	1.14
2009	109	Jamaica	116	Potatoes	0.0132002	0	2.37603	1.94
2009	170	Peru	116	Potatoes	0.0531136	8.81685	5.31136	7.61
2009	108	Kazakhstan	116	Potatoes	0.0137972	1.4901	1.77984	11.614
2009	118	Kuwait	116	Potatoes	0.0393746	7.24493	0.472495	0.14
2009	33	Canada	116	Potatoes	16.1337	0	2210.32	110.909
2009	165	Pakistan	116	Potatoes	0.0330108	4.2914	1.74957	0.594
2009	3	Albania	116	Potatoes	0.0519293	3.21962	7.58168	4.4
2009	198	Slovenia	116	Potatoes	4.61608	9.23216	946.296	4.224
2009	194	Saudi Arabia	116	Potatoes	0.0135086	3.57978	0.18912	0.479
2009	97	Hungary	116	Potatoes	7.70096	61.6077	1239.85	4.007
2009	44	Colombia	116	Potatoes	0.0107995	0	2.63509	9.648
2009	100	India	116	Potatoes	0.0674045	2.42656	14.8964	0.881
2009	215	Tanzania	116	Potatoes	0.0891395	NA	NA	2.006
2009	210	Sweden	116	Potatoes	6816.31	61346.8	667998	20.223
2009	104	Ireland	116	Potatoes	5.57158	5.57158	546.014	19.74
2009	256	Luxembourg	116	Potatoes	5.26113	0	620.814	1.954
2009	272	Serbia	116	Potatoes	0.765328	NA	NA	4.37
2009	54	Denmark	116	Potatoes	4346.02	69536.2	330297	7.856
2009	222	Tunisia	116	Potatoes	2.08523	254.398	237.717	0.869
2009	109	Jamaica	122	Sweet potatoes	0.834022	2.50207	241.866	1.94
2009	131	Malaysia	122	Sweet potatoes	0.0154581	0.0309161	7.04888	25.815
2009	84	Greece	122	Sweet potatoes	0.121701	14.239	14.9692	4.259
2009	170	Peru	122	Sweet potatoes	3.9264	184.541	840.25	7.61
2009	159	Nigeria	122	Sweet potatoes	0.0204301	0.0204301	26.2936	2.328
2009	138	Mexico	122	Sweet potatoes	0.111468	5.12751	25.8605	4.236
2009	21	Brazil	122	Sweet potatoes	90.6871	634.81	38723.4	16.749
2009	129	Madagascar	122	Sweet potatoes	0.0268632	0.0268632	30.9733	5.758
2009	105	Israel	122	Sweet potatoes	196.55	36951.4	10417.1	0.486
2009	214	Taiwan	122	Sweet potatoes	0.0322503	NA	NA	2
2009	32	Cameroon	122	Sweet potatoes	0.235275	0.470549	207.748	4.848
2009	174	Portugal	122	Sweet potatoes	10.9465	2036.06	4685.12	2.74
2009	234	Uruguay	122	Sweet potatoes	6.61661	112.482	3725.15	14.962
2009	48	Costa Rica	122	Sweet potatoes	0.340008	0	0	4.51
2009	41	China	122	Sweet potatoes	453.624	1814.5	109777	1.508
2009	59	Egypt	122	Sweet potatoes	50.8775	6207.06	3154.41	1.681
2009	237	Vietnam	122	Sweet potatoes	0.320293	0.320293	219.721	3.809
2009	101	Indonesia	122	Sweet potatoes	0.0195665	0.332631	11.0355	16.287
2009	107	Cote d'Ivoire	122	Sweet potatoes	0.11667	NA	NA	2.937
2009	202	South Africa	122	Sweet potatoes	63.9369	44628	76212.8	2.449
2009	9	Argentina	122	Sweet potatoes	0.0292467	1.16987	11.5232	13.678
2009	207	Suriname	122	Sweet potatoes	1.4666	0	459.045	121.744
2009	117	South Korea	122	Sweet potatoes	0.118145	NA	NA	1.14
2009	95	Honduras	122	Sweet potatoes	45.3891	181.556	32770.9	4.51
2009	10	Australia	122	Sweet potatoes	0.192681	5.97311	46.8215	53.268
2009	89	Guatemala	122	Sweet potatoes	0.0919482	0	0	4.459
2009	81	Ghana	122	Sweet potatoes	0.276747	0.276747	697.402	2.981
2009	106	Italy	122	Sweet potatoes	8.41874	336.75	2390.92	2.273
2009	231	United States	122	Sweet potatoes	298.603	17020.4	62706.7	22
2009	203	Spain	122	Sweet potatoes	18.8262	2974.55	3539.33	2.701
2009	226	Uganda	122	Sweet potatoes	2.05579	0	1632.3	1.578
2009	110	Japan	122	Sweet potatoes	0.0112289	0	1.74047	3.555
2009	29	Burundi	122	Sweet potatoes	0.0971328	0	63.1363	0.42
2009	169	Paraguay	122	Sweet potatoes	0.270498	0	256.162	15.566
2009	56	Dominican Republic	122	Sweet potatoes	2.47453	32.1689	2187.49	1.03
2009	58	Ecuador	122	Sweet potatoes	0.0475527	13.077	73.136	2.575
2009	197	Sierra Leone	125	Cassava	0.0213189	0	35.1549	2.658
2009	75	Gambia	125	Cassava	0.017283	0	35.9832	2.186
2009	157	Nicaragua	125	Cassava	0.201979	0	144.011	4.51
2009	171	Philippines	125	Cassava	0.239453	0	213.113	3.939
2009	215	Tanzania	125	Cassava	0.576282	NA	NA	2.006
2009	66	Fiji	125	Cassava	0.108722	NA	NA	NA
2009	9	Argentina	125	Cassava	4.48966	0	10954.8	13.678
2009	237	Vietnam	125	Cassava	89.4659	0	50458.8	3.809
2009	81	Ghana	125	Cassava	12.0703	0	6517.98	2.981
2009	101	Indonesia	125	Cassava	0.481547	0	202.25	16.287
2009	120	Lao	125	Cassava	0.120185	NA	NA	8.865
2009	236	Venezuela	125	Cassava	0.0669004	NA	NA	17.1
2009	41	China	125	Cassava	1.13998	0	377.334	1.508
2009	166	Panama	125	Cassava	0.0107235	0	6.4341	4.505
2009	250	Congo, Dem. Rep.	125	Cassava	0.0659205	NA	NA	7.345
2009	100	India	125	Cassava	1.33244	0	343.769	0.881
2009	207	Suriname	125	Cassava	0.183632	0	58.7622	121.744
2009	58	Ecuador	125	Cassava	2.27389	0	1712.24	2.575
2009	48	Costa Rica	125	Cassava	49.4305	0	25802.7	4.51
2009	95	Honduras	125	Cassava	0.0259958	0	40.5794	4.51
2009	131	Malaysia	125	Cassava	0.013858	0	10.2965	25.815
2009	217	Togo	125	Cassava	0.329695	0	245.293	1.598
2009	216	Thailand	125	Cassava	1068.19	0	464663	3.613
2009	53	Benin	125	Cassava	0.0150129	0	6.27541	2.331
2009	107	Cote d'Ivoire	125	Cassava	0.646352	NA	NA	2.937
2009	109	Jamaica	125	Cassava	0.0454265	0	18.5795	1.94
2009	32	Cameroon	125	Cassava	1.39675	0	885.539	4.848
2009	115	Cambodia	125	Cassava	34.3514	0	21778.8	9.505
2009	44	Colombia	125	Cassava	0.178353	0	106.834	9.648
2009	159	Nigeria	125	Cassava	7.59424	0	3941.41	2.328
2009	21	Brazil	125	Cassava	898.195	898.195	388919	16.749
2009	38	Sri Lanka	125	Cassava	2.04468	0	1615.3	2.1
2009	226	Uganda	125	Cassava	0.271087	0	124.7	1.578
2009	169	Paraguay	125	Cassava	18.2154	0	9727.02	15.566
2009	21	Brazil	137	Yams	3.95013	27.6509	1797.31	16.749
2009	159	Nigeria	137	Yams	0.688185	0	220.219	2.328
2009	130	Malawi	149	Roots and tubers, nes	0.0156354	0	0	1.342
2009	66	Fiji	149	Roots and tubers, nes	6.08081	NA	NA	NA
2009	101	Indonesia	149	Roots and tubers, nes	0.620126	22.3245	322.465	16.287
2009	171	Philippines	149	Roots and tubers, nes	0.0155251	0.0310501	9.22189	3.939
2009	109	Jamaica	149	Roots and tubers, nes	0.167833	0.503499	27.3568	1.94
2009	110	Japan	149	Roots and tubers, nes	0.064453	0.064453	10.5058	3.555
2009	107	Cote d'Ivoire	149	Roots and tubers, nes	0.45414	NA	NA	2.937
2009	166	Panama	149	Roots and tubers, nes	0.198187	0	26.3589	4.505
2009	170	Peru	149	Roots and tubers, nes	0.187823	25.1682	82.642	7.61
2009	114	Kenya	149	Roots and tubers, nes	0.0695921	0.417553	20.2513	1.018
2009	198	Slovenia	149	Roots and tubers, nes	9.69811	0	0	4.224
2009	165	Pakistan	149	Roots and tubers, nes	0.336593	21.5419	9.76119	0.594
2009	63	Estonia	149	Roots and tubers, nes	12.5424	0	1003.39	8.345
2009	157	Nicaragua	149	Roots and tubers, nes	0.482713	0.965427	332.59	4.51
2009	44	Colombia	149	Roots and tubers, nes	0.275599	2.48039	68.3486	9.648
2009	215	Tanzania	149	Roots and tubers, nes	0.0599535	NA	NA	2.006
2009	32	Cameroon	149	Roots and tubers, nes	1.3934	1.3934	770.551	4.848
2009	41	China	149	Roots and tubers, nes	14.2405	85.443	2534.81	1.508
2009	48	Costa Rica	149	Roots and tubers, nes	3.83704	11.5111	1304.59	4.51
2009	217	Togo	149	Roots and tubers, nes	0.327439	0	140.471	1.598
2009	203	Spain	149	Roots and tubers, nes	1.91668	153.335	155.251	2.701
2009	138	Mexico	149	Roots and tubers, nes	0.191582	4.98112	17.4339	4.236
2009	207	Suriname	149	Roots and tubers, nes	0.641607	0	254.718	121.744
2009	95	Honduras	149	Roots and tubers, nes	2.86356	28.6356	1156.88	4.51
2009	58	Ecuador	149	Roots and tubers, nes	0.267812	93.1987	209.162	2.575
2009	216	Thailand	149	Roots and tubers, nes	1.7968	17.968	465.371	3.613
2009	59	Egypt	149	Roots and tubers, nes	0.140517	89.088	14.8948	1.681
2009	81	Ghana	149	Roots and tubers, nes	8.43837	8.43837	3746.63	2.981
2009	169	Paraguay	15	Wheat	4.49002	0	9119.22	15.566
2009	27	Bulgaria	15	Wheat	603.006	0	887022	4.006
2009	102	Iran	15	Wheat	0.660392	NA	NA	0.976
2009	211	Switzerland	15	Wheat	278.818	0	193779	1.642
2009	234	Uruguay	15	Wheat	51.9055	51.9055	98360.9	14.962
2009	52	Azerbaijan	15	Wheat	0.0830886	12.5464	80.4298	1.916
2009	105	Israel	15	Wheat	2.67801	64.2723	5639.89	0.486
2009	104	Ireland	15	Wheat	591.273	0	243604	19.74
2009	44	Colombia	15	Wheat	0.0224455	0	49.7616	9.648
2009	141	Mongolia	15	Wheat	0.0410014	0	53.4658	8.853
2009	194	Saudi Arabia	15	Wheat	0.909964	994.591	216.571	0.479
2009	59	Egypt	15	Wheat	9.15128	8272.75	1967.52	1.681
2009	229	United Kingdom	15	Wheat	7692.11	0	3.16915e+06	5.868
2009	108	Kazakhstan	15	Wheat	5493.02	131833	1.85664e+07	11.614
2009	106	Italy	15	Wheat	4696.37	75142	5.57929e+06	2.273
2009	143	Morocco	15	Wheat	0.378036	92.6188	1042.62	0.939
2009	9	Argentina	15	Wheat	29.9444	329.388	53001.5	13.678
2009	170	Peru	15	Wheat	0.0838015	0	293.389	7.61
2009	33	Canada	15	Wheat	1980.02	9900.1	2.64531e+06	110.909
2009	114	Kenya	15	Wheat	0.0780889	0	116.509	1.018
2009	113	Kyrgyz Republic	15	Wheat	2.92356	1830.15	4364.88	1.352
2009	3	Albania	15	Wheat	0.0484263	0.677969	53.7532	4.4
2009	98	Croatia	15	Wheat	97.258	0	123226	4.398
2009	28	Myanmar	15	Wheat	0.0105108	7.46267	20.5696	9.429
2009	199	Slovak Republic	15	Wheat	806.546	3226.18	751700	3.987
2009	68	France	15	Wheat	31733	31733	1.84369e+07	5.064
2009	11	Austria	15	Wheat	911.393	0	625215	2.873
2009	84	Greece	15	Wheat	265.967	7713.04	395227	4.259
2009	19	Bolivia	15	Wheat	0.259499	0	1425.69	11.75
2009	138	Mexico	15	Wheat	120.748	67377.1	40208.9	4.236
2009	41	China	15	Wheat	241.741	112651	198470	1.508
2009	174	Portugal	15	Wheat	16.8409	3048.21	57309.7	2.74
2009	129	Madagascar	15	Wheat	0.0114215	0	19.1768	5.758
2009	202	South Africa	15	Wheat	0.534622	122.963	556.007	2.449
2009	216	Thailand	15	Wheat	0.12857	0	536.65	3.613
2009	10	Australia	15	Wheat	574.365	9189.85	1.14758e+06	53.268
2009	63	Estonia	15	Wheat	11181.3	0	1.92319e+07	8.345
2009	100	India	15	Wheat	28.855	33789.2	18294.1	0.881
2009	223	Turkey	15	Wheat	143.243	18621.5	297085	1.801
2009	146	Moldova	15	Wheat	176.225	9868.59	323196	4.089
2009	110	Japan	15	Wheat	1.44519	7.22594	1557.91	3.555
2009	162	Norway	15	Wheat	420.686	0	291536	55.393
2009	167	Czech Republic	15	Wheat	4523.17	0	3.24764e+06	3.932
2009	119	Latvia	15	Wheat	5126.3	0	7.07429e+06	8.345
2009	150	Netherlands	15	Wheat	3355.14	0	1.71448e+06	3.277
2009	250	Congo, Dem. Rep.	15	Wheat	0.0811514	NA	NA	7.345
2009	159	Nigeria	15	Wheat	0.0632659	131.277	43.0841	2.328
2009	40	Chile	15	Wheat	4.10247	873.827	4184.52	21.914
2009	238	Ethiopia	15	Wheat	1.14992	NA	NA	0.815
2009	251	Zambia	15	Wheat	0.252299	177.366	46.1707	5.161
2009	57	Belarus	15	Wheat	26.2422	0	31936.8	5.092
2009	21	Brazil	15	Wheat	14.0131	14.0131	27872.1	16.749
2009	212	Syria	15	Wheat	11.1113	4888.96	16155.8	0.976
2009	203	Spain	15	Wheat	2226.47	106871	3.10371e+06	2.701
2009	255	Belgium	15	Wheat	3329.07	0	1.34162e+06	2.037
2009	213	Turkmenistan	15	Wheat	0.0128811	2.87248	13.4736	2.688
2009	121	Lebanon	15	Wheat	0.306972	29.7763	477.649	0.544
2009	165	Pakistan	15	Wheat	5.45675	8015.96	3492.32	0.594
2009	117	South Korea	15	Wheat	0.0199089	NA	NA	1.14
2009	230	Ukraine	15	Wheat	1300.39	24707.4	2.24317e+06	4.3
2009	256	Luxembourg	15	Wheat	178.589	0	132513	1.954
2009	16	Bangladesh	15	Wheat	0.197208	66.6563	201.546	2.294
2009	79	Germany	15	Wheat	44475.7	0	2.66409e+07	3.061
2009	215	Tanzania	15	Wheat	0.0302915	NA	NA	2.006
2009	126	Lithuania	15	Wheat	17305.4	0	2.17529e+07	8.15
2009	173	Poland	15	Wheat	8057.22	0	8.9838e+06	3.103
2009	4	Algeria	15	Wheat	0.0302264	1.96472	99.4448	0.85
2009	54	Denmark	15	Wheat	21757.7	130546	1.15316e+07	7.856
2009	134	Malta	15	Wheat	0.164883	0	149.878	NA
2009	272	Serbia	15	Wheat	9.52837	NA	NA	4.37
2009	231	United States	15	Wheat	1212.63	111562	2.26641e+06	22
2009	154	NA	15	Wheat	0.859619	NA	NA	NA
2009	222	Tunisia	15	Wheat	8.53848	614.771	20278.9	0.869
2009	185	Russia	15	Wheat	969.912	29097.4	2.22886e+06	12.681
2009	97	Hungary	15	Wheat	1478.49	2956.98	1.38535e+06	4.007
2009	80	Bosnia and Herzegovina	15	Wheat	7.53318	0	12844.1	4.4
2009	198	Slovenia	15	Wheat	12.967	12.967	14613.8	4.224
2009	156	New Zealand	15	Wheat	38.1674	0	27442.4	58.852
2009	50	Cyprus	15	Wheat	1.33387	188.075	2194.21	NA
2009	210	Sweden	15	Wheat	27973.4	0	1.30636e+07	20.223
2009	149	Nepal	15	Wheat	0.220394	410.815	285.411	0.716
2009	183	Romania	15	Wheat	521.517	23468.3	868848	4.002
2009	101	Indonesia	161	Sugar crops, nes	143.401	0	369688	16.287
2009	183	Romania	162	Sugar Raw Centrifugal	8.00899	12.0135	796.894	4.002
2009	209	Swaziland	162	Sugar Raw Centrifugal	278.47	9189.5	7657.92	1.163
2009	233	Burkina Faso	162	Sugar Raw Centrifugal	0.0128834	0.334969	0.631288	0.973
2009	52	Azerbaijan	162	Sugar Raw Centrifugal	8.34067	337.797	396.182	1.916
2009	101	Indonesia	162	Sugar Raw Centrifugal	228.582	5257.38	18629.4	16.287
2009	231	United States	162	Sugar Raw Centrifugal	759.292	23917.7	92254	22
2009	202	South Africa	162	Sugar Raw Centrifugal	251.315	3518.41	14953.2	2.449
2009	57	Belarus	162	Sugar Raw Centrifugal	3745.28	0	226590	5.092
2009	1	Armenia	162	Sugar Raw Centrifugal	0.285681	0	22.9973	1.896
2009	16	Bangladesh	162	Sugar Raw Centrifugal	0.944918	23.1505	139.375	2.294
2009	166	Panama	162	Sugar Raw Centrifugal	13.8966	118.121	1514.73	4.505
2009	14	Barbados	162	Sugar Raw Centrifugal	28.9915	0	3464.49	NA
2009	98	Croatia	162	Sugar Raw Centrifugal	79.8587	0	4591.88	4.398
2009	89	Guatemala	162	Sugar Raw Centrifugal	216.999	1410.49	13887.9	4.459
2009	215	Tanzania	162	Sugar Raw Centrifugal	71.5905	NA	NA	2.006
2009	223	Turkey	162	Sugar Raw Centrifugal	117.655	5176.81	3294.33	1.801
2009	79	Germany	162	Sugar Raw Centrifugal	29563.7	44345.6	886912	3.061
2009	28	Myanmar	162	Sugar Raw Centrifugal	0.310181	0.775454	37.9972	9.429
2009	100	India	162	Sugar Raw Centrifugal	104.781	7387.06	6391.64	0.881
2009	211	Switzerland	162	Sugar Raw Centrifugal	173.121	0	4414.59	1.642
2009	106	Italy	162	Sugar Raw Centrifugal	307.804	1846.82	13851.2	2.273
2009	144	Mozambique	162	Sugar Raw Centrifugal	119.483	8184.6	27361.7	3.451
2009	9	Argentina	162	Sugar Raw Centrifugal	1265.14	17079.4	56298.8	13.678
2009	137	Mauritius	162	Sugar Raw Centrifugal	1049.82	2624.54	73487.3	NA
2009	146	Moldova	162	Sugar Raw Centrifugal	237.04	2963	19081.7	4.089
2009	21	Brazil	162	Sugar Raw Centrifugal	59572.4	148931	3.63392e+06	16.749
2009	40	Chile	162	Sugar Raw Centrifugal	5.03373	181.214	98.1577	21.914
2009	49	Cuba	162	Sugar Raw Centrifugal	12678.6	316966	2.26947e+06	2.817
2009	126	Lithuania	162	Sugar Raw Centrifugal	5589.29	0	282259	8.15
2009	44	Colombia	162	Sugar Raw Centrifugal	1511.76	6047.04	94485	9.648
2009	210	Sweden	162	Sugar Raw Centrifugal	28470.2	42705.3	1.02493e+06	20.223
2009	255	Belgium	162	Sugar Raw Centrifugal	2879.55	0	73428.5	2.037
2009	53	Benin	162	Sugar Raw Centrifugal	3.18753	121.126	408.004	2.331
2009	41	China	162	Sugar Raw Centrifugal	233.817	701.451	37060	1.508
2009	185	Russia	162	Sugar Raw Centrifugal	10324.1	67106.6	851737	12.681
2009	48	Costa Rica	162	Sugar Raw Centrifugal	22.2819	267.383	1559.73	4.51
2009	181	Zimbabwe	162	Sugar Raw Centrifugal	246.992	9632.68	5063.33	1.66
2009	107	Cote d'Ivoire	162	Sugar Raw Centrifugal	6.73987	NA	NA	2.937
2009	214	Taiwan	162	Sugar Raw Centrifugal	5.60168	NA	NA	2
2009	109	Jamaica	162	Sugar Raw Centrifugal	76.6102	1034.24	7929.16	1.94
2009	46	Congo, Rep.	162	Sugar Raw Centrifugal	0.172239	3.27255	670.528	12.17
2009	32	Cameroon	162	Sugar Raw Centrifugal	0.114392	0	66.1759	4.848
2009	167	Czech Republic	162	Sugar Raw Centrifugal	578.051	0	23700.1	3.932
2009	38	Sri Lanka	162	Sugar Raw Centrifugal	0.0339932	2.10758	3.29734	2.1
2009	237	Vietnam	162	Sugar Raw Centrifugal	19.5756	332.785	2133.74	3.809
2009	114	Kenya	162	Sugar Raw Centrifugal	7.63556	7.63556	362.689	1.018
2009	169	Paraguay	162	Sugar Raw Centrifugal	211.447	2431.65	23576.4	15.566
2009	203	Spain	162	Sugar Raw Centrifugal	387.669	27524.5	19965	2.701
2009	149	Nepal	162	Sugar Raw Centrifugal	0.0417085	1.52236	6.27712	0.716
2009	102	Iran	162	Sugar Raw Centrifugal	1.75509	NA	NA	0.976
2009	3	Albania	162	Sugar Raw Centrifugal	0.0162256	0.0567896	0.949197	4.4
2009	110	Japan	162	Sugar Raw Centrifugal	4.17501	10.4375	465.514	3.555
2009	197	Sierra Leone	162	Sugar Raw Centrifugal	2.73619	43.779	147.754	2.658
2009	130	Malawi	162	Sugar Raw Centrifugal	1426.93	48515.5	45661.6	1.342
2009	59	Egypt	162	Sugar Raw Centrifugal	125.63	19598.3	1821.64	1.681
2009	229	United Kingdom	162	Sugar Raw Centrifugal	1552.95	776.476	51247.4	5.868
2009	11	Austria	162	Sugar Raw Centrifugal	661.209	1322.42	19836.3	2.873
2009	170	Peru	162	Sugar Raw Centrifugal	6.85181	208.98	164.444	7.61
2009	108	Kazakhstan	162	Sugar Raw Centrifugal	0.178017	21.184	10.77	11.614
2009	226	Uganda	162	Sugar Raw Centrifugal	2.15896	0	137.094	1.578
2009	120	Lao	162	Sugar Raw Centrifugal	1.31978	NA	NA	8.865
2009	157	Nicaragua	162	Sugar Raw Centrifugal	25.4043	203.234	1841.81	4.51
2009	95	Honduras	162	Sugar Raw Centrifugal	202.039	707.135	15051.9	4.51
2009	165	Pakistan	162	Sugar Raw Centrifugal	1801.67	208093	178365	0.594
2009	199	Slovak Republic	162	Sugar Raw Centrifugal	247.847	1363.16	11153.1	3.987
2009	131	Malaysia	162	Sugar Raw Centrifugal	0.428831	6.8613	42.2399	25.815
2009	23	Belize	162	Sugar Raw Centrifugal	109.188	109.188	13539.3	5.148
2009	68	France	162	Sugar Raw Centrifugal	10523.9	5261.94	226263	5.064
2009	234	Uruguay	162	Sugar Raw Centrifugal	3.79668	1.89834	353.092	14.962
2009	66	Fiji	162	Sugar Raw Centrifugal	207.506	NA	NA	NA
2009	230	Ukraine	162	Sugar Raw Centrifugal	719.767	1079.65	65858.7	4.3
2009	207	Suriname	162	Sugar Raw Centrifugal	0.173797	0	25.2006	121.744
2009	173	Poland	162	Sugar Raw Centrifugal	7727.88	3863.94	355482	3.103
2009	91	Guyana	162	Sugar Raw Centrifugal	239.825	1558.86	20385.1	127.073
2009	238	Ethiopia	162	Sugar Raw Centrifugal	209.794	NA	NA	0.815
2009	84	Greece	162	Sugar Raw Centrifugal	81.8423	2209.74	1923.29	4.259
2009	97	Hungary	162	Sugar Raw Centrifugal	61.8081	30.9041	2935.89	4.007
2009	236	Venezuela	162	Sugar Raw Centrifugal	2.46768	NA	NA	17.1
2009	56	Dominican Republic	162	Sugar Raw Centrifugal	104.686	5234.29	14027.9	1.03
2009	206	NA	162	Sugar Raw Centrifugal	25.2693	2842.8	391.674	NA
2009	195	Senegal	162	Sugar Raw Centrifugal	0.0177678	0.533033	0.346472	1.544
2009	54	Denmark	162	Sugar Raw Centrifugal	7698.88	0	219418	7.856
2009	129	Madagascar	162	Sugar Raw Centrifugal	4.05283	77.0037	581.581	5.758
2009	10	Australia	162	Sugar Raw Centrifugal	150.976	4000.86	5510.63	53.268
2009	212	Syria	162	Sugar Raw Centrifugal	7.60662	247.215	509.643	0.976
2009	150	Netherlands	162	Sugar Raw Centrifugal	11935.1	0	328216	3.277
2009	251	Zambia	162	Sugar Raw Centrifugal	349.242	15890.5	6460.98	5.161
2009	272	Serbia	162	Sugar Raw Centrifugal	260.485	NA	NA	4.37
2009	138	Mexico	162	Sugar Raw Centrifugal	270.293	4459.83	21353.1	4.236
2009	58	Ecuador	162	Sugar Raw Centrifugal	14.1091	522.037	4190.41	2.575
2009	171	Philippines	162	Sugar Raw Centrifugal	32.2518	274.14	2612.4	3.939
2009	143	Morocco	162	Sugar Raw Centrifugal	15.6185	1764.89	671.595	0.939
2009	60	El Salvador	162	Sugar Raw Centrifugal	285.07	712.676	20952.7	4.51
2009	33	Canada	162	Sugar Raw Centrifugal	6.0607	0	242.428	110.909
2009	154	NA	162	Sugar Raw Centrifugal	0.0429549	NA	NA	NA
2009	216	Thailand	162	Sugar Raw Centrifugal	867.457	18650.3	90649.3	3.613
2009	19	Bolivia	162	Sugar Raw Centrifugal	124.338	559.52	9387.5	11.75
2009	116	North Korea	176	Beans, dry	0.0436735	NA	NA	1.141
2009	208	Tajikistan	176	Beans, dry	0.057108	93.8855	45.0582	1.08
2009	130	Malawi	176	Beans, dry	0.0167346	0	27.2774	1.342
2009	114	Kenya	176	Beans, dry	0.142013	0	1181.41	1.018
2009	19	Bolivia	176	Beans, dry	0.694042	0	1007.06	11.75
2009	33	Canada	176	Beans, dry	53.6971	0	60892.5	110.909
2009	113	Kyrgyz Republic	176	Beans, dry	1.94253	186.483	1713.31	1.352
2009	216	Thailand	176	Beans, dry	5.47669	0	22843.3	3.613
2009	206	NA	176	Beans, dry	0.0141286	3.97013	18.2259	NA
2009	129	Madagascar	176	Beans, dry	0.941888	0	1516.44	5.758
2009	104	Ireland	176	Beans, dry	9.23019	0	3369.02	19.74
2009	226	Uganda	176	Beans, dry	0.171448	0	967.311	1.578
2009	63	Estonia	176	Beans, dry	1.21423	0	1217.87	8.345
2009	21	Brazil	176	Beans, dry	0.419615	26.0161	1158.56	16.749
2009	237	Vietnam	176	Beans, dry	0.0710331	0	295.711	3.809
2009	10	Australia	176	Beans, dry	1.50106	0	5114.1	53.268
2009	146	Moldova	176	Beans, dry	0.159283	10.6719	388.65	4.089
2009	255	Belgium	176	Beans, dry	0.0655668	0	47.3393	2.037
2009	120	Lao	176	Beans, dry	0.0202226	NA	NA	8.865
2009	157	Nicaragua	176	Beans, dry	0.127932	34.9254	931.984	4.51
2009	126	Lithuania	176	Beans, dry	9.18386	0	10194.1	8.15
2009	40	Chile	176	Beans, dry	2.54358	66.1331	2174.76	21.914
2009	106	Italy	176	Beans, dry	1.2587	0	1604.84	2.273
2009	121	Lebanon	176	Beans, dry	0.0276993	0	12.16	0.544
2009	81	Ghana	176	Beans, dry	0.0219339	0	0	2.981
2009	101	Indonesia	176	Beans, dry	0.102673	10.7807	343.853	16.287
2009	185	Russia	176	Beans, dry	0.0119105	0.464511	20.3313	12.681
2009	119	Latvia	176	Beans, dry	4.36145	0	4605.69	8.345
2009	203	Spain	176	Beans, dry	2.44743	526.197	4789.62	2.701
2009	165	Pakistan	176	Beans, dry	0.0916181	117.729	426.299	0.594
2009	183	Romania	176	Beans, dry	0.0119605	0	21.17	4.002
2009	57	Belarus	176	Beans, dry	1.62093	1.62093	2261.2	5.092
2009	72	Djibouti	176	Beans, dry	0.112816	166.629	737.817	0.92
2009	68	France	176	Beans, dry	0.472273	17.9464	406.627	5.064
2009	198	Slovenia	176	Beans, dry	0.0382551	0	46.3652	4.224
2009	231	United States	176	Beans, dry	17.2558	7385.49	20983.1	22
2009	44	Colombia	176	Beans, dry	0.0201033	0	53.0526	9.648
2009	84	Greece	176	Beans, dry	0.705742	212.428	512.368	4.259
2009	97	Hungary	176	Beans, dry	0.0670636	7.30994	124.001	4.007
2009	202	South Africa	176	Beans, dry	0.0100959	8.43004	7.8041	2.449
2009	59	Egypt	176	Beans, dry	1.74111	3294.19	548.451	1.681
2009	170	Peru	176	Beans, dry	3.13819	2764.74	5134.07	7.61
2009	149	Nepal	176	Beans, dry	0.104521	0	541.731	0.716
2009	174	Portugal	176	Beans, dry	0.119682	0	388.247	2.74
2009	138	Mexico	176	Beans, dry	0.255958	44.5367	1118.28	4.236
2009	102	Iran	176	Beans, dry	0.0378767	NA	NA	0.976
2009	28	Myanmar	176	Beans, dry	7.8657	0	28355.9	9.429
2009	230	Ukraine	176	Beans, dry	0.243163	0	333.377	4.3
2009	23	Belize	176	Beans, dry	0.0939734	0	370.255	5.148
2009	38	Sri Lanka	176	Beans, dry	0.0267294	0	91.6016	2.1
2009	41	China	176	Beans, dry	88.8435	0	168447	1.508
2009	27	Bulgaria	176	Beans, dry	0.010265	0	33.392	4.006
2009	238	Ethiopia	176	Beans, dry	13.196	NA	NA	0.815
2009	9	Argentina	176	Beans, dry	14.2963	414.592	15826	13.678
2009	144	Mozambique	176	Beans, dry	0.0172283	0	0	3.451
2009	58	Ecuador	176	Beans, dry	0.0748586	41.6962	313.508	2.575
2009	60	El Salvador	176	Beans, dry	0.0435095	0	180.39	4.51
2009	256	Luxembourg	176	Beans, dry	0.0654806	0	44.1339	1.954
2009	100	India	176	Beans, dry	3.49253	583.252	30737.8	0.881
2009	199	Slovak Republic	176	Beans, dry	0.031052	0	51.298	3.987
2009	150	Netherlands	176	Beans, dry	7.53008	0	4631	3.277
2009	214	Taiwan	176	Beans, dry	0.0184278	NA	NA	2
2009	236	Venezuela	176	Beans, dry	0.227669	NA	NA	17.1
2009	98	Croatia	176	Beans, dry	0.032728	0	29.8152	4.398
2009	234	Uruguay	176	Beans, dry	0.0257307	0	64.9958	14.962
2009	223	Turkey	176	Beans, dry	8.2805	1399.4	8156.29	1.801
2009	215	Tanzania	176	Beans, dry	3.09154	NA	NA	2.006
2009	173	Poland	176	Beans, dry	0.451974	0	517.059	3.103
2009	210	Sweden	176	Beans, dry	9.4977	0	12660.4	20.223
2009	79	Germany	181	Broad beans, horse beans, dry	7.63788	0	3841.85	3.061
2009	229	United Kingdom	181	Broad beans, horse beans, dry	0.0316873	0	23.1634	5.868
2009	126	Lithuania	181	Broad beans, horse beans, dry	0.196676	0	0	8.15
2009	68	France	181	Broad beans, horse beans, dry	0.0134262	0.375933	5.96122	5.064
2009	167	Czech Republic	181	Broad beans, horse beans, dry	0.0220308	0	27.3402	3.932
2009	106	Italy	181	Broad beans, horse beans, dry	0.0683019	0	78.957	2.273
2009	215	Tanzania	187	Peas, dry	0.0407568	NA	NA	2.006
2009	40	Chile	187	Peas, dry	0.0294787	2.00455	43.5991	21.914
2009	129	Madagascar	187	Peas, dry	0.189144	0	91.9242	5.758
2009	27	Bulgaria	187	Peas, dry	0.0151625	0	20.4238	4.006
2009	255	Belgium	187	Peas, dry	6.80128	0	3597.88	2.037
2009	199	Slovak Republic	187	Peas, dry	6.00925	0	7439.46	3.987
2009	130	Malawi	187	Peas, dry	0.196986	0	334.482	1.342
2009	185	Russia	187	Peas, dry	27.5486	1542.72	46033.6	12.681
2009	28	Myanmar	187	Peas, dry	0.435941	0	1827.9	9.429
2009	57	Belarus	187	Peas, dry	0.440879	0.440879	618.554	5.092
2009	170	Peru	187	Peas, dry	0.114978	95.202	165.339	7.61
2009	79	Germany	187	Peas, dry	205.721	0	151205	3.061
2009	106	Italy	187	Peas, dry	2.46885	0	2029.4	2.273
2009	223	Turkey	187	Peas, dry	0.0217746	1.91617	18.9657	1.801
2009	126	Lithuania	187	Peas, dry	50.5707	0	73529.9	8.15
2009	256	Luxembourg	187	Peas, dry	0.718503	0	543.188	1.954
2009	210	Sweden	187	Peas, dry	248.047	0	196453	20.223
2009	231	United States	187	Peas, dry	17.3406	832.349	18329	22
2009	150	Netherlands	187	Peas, dry	16.8796	0	8574.82	3.277
2009	146	Moldova	187	Peas, dry	0.0901566	5.77003	174.724	4.089
2009	173	Poland	187	Peas, dry	0.495473	0	556.417	3.103
2009	203	Spain	187	Peas, dry	25.8121	2400.53	47210.3	2.701
2009	9	Argentina	187	Peas, dry	0.203917	4.69009	261.014	13.678
2009	183	Romania	187	Peas, dry	1.04486	0	1559.98	4.002
2009	100	India	187	Peas, dry	0.0370144	3.10921	149.02	0.881
2009	119	Latvia	187	Peas, dry	2.10523	0	2901	8.345
2009	121	Lebanon	187	Peas, dry	0.0304033	0	17.7555	0.544
2009	230	Ukraine	187	Peas, dry	37.5887	0	59540.5	4.3
2009	162	Norway	187	Peas, dry	0.0920972	0	0	55.393
2009	68	France	187	Peas, dry	317.039	8243.01	154715	5.064
2009	10	Australia	187	Peas, dry	8.86593	0	13174.8	53.268
2009	167	Czech Republic	187	Peas, dry	31.2777	0	32685.1	3.932
2009	212	Syria	187	Peas, dry	0.0139688	1.27116	14.7651	0.976
2009	156	New Zealand	187	Peas, dry	53.9675	0	24717.1	58.852
2009	11	Austria	187	Peas, dry	12.2199	0	9971.48	2.873
2009	54	Denmark	187	Peas, dry	92.1515	0	52157.7	7.856
2009	211	Switzerland	187	Peas, dry	0.804204	0	529.166	1.642
2009	198	Slovenia	187	Peas, dry	0.0386662	0	30.005	4.224
2009	97	Hungary	187	Peas, dry	49.2679	3793.63	55869.8	4.007
2009	41	China	187	Peas, dry	0.660501	0	1336.19	1.508
2009	229	United Kingdom	187	Peas, dry	102.721	0	59578.1	5.868
2009	63	Estonia	187	Peas, dry	40.5995	0	60087.2	8.345
2009	33	Canada	187	Peas, dry	79.6045	0	95445.8	110.909
2009	104	Ireland	187	Peas, dry	0.784756	0	375.898	19.74
2009	121	Lebanon	191	Chick peas	0.0603145	0	60.8573	0.544
2009	40	Chile	191	Chick peas	0.0160132	1.5693	17.1662	21.914
2009	100	India	191	Chick peas	2.02741	174.357	6443.11	0.881
2009	59	Egypt	191	Chick peas	0.0755839	93.195	40.7397	1.681
2009	212	Syria	191	Chick peas	0.0382072	2.6745	79.0125	0.976
2009	143	Morocco	191	Chick peas	0.015785	2.77816	48.3653	0.939
2009	203	Spain	191	Chick peas	0.634122	28.5355	1921.39	2.701
2009	10	Australia	191	Chick peas	5.1983	0	6310.74	53.268
2009	238	Ethiopia	191	Chick peas	0.198867	NA	NA	0.815
2009	174	Portugal	191	Chick peas	0.0108949	0	36.4108	2.74
2009	108	Kazakhstan	191	Chick peas	0.0233994	0	42.7274	11.614
2009	102	Iran	191	Chick peas	0.163249	NA	NA	0.976
2009	41	China	191	Chick peas	0.0619614	0	38.2302	1.508
2009	223	Turkey	191	Chick peas	27.2495	2888.45	58722.7	1.801
2009	106	Italy	191	Chick peas	3.74484	0	6680.8	2.273
2009	215	Tanzania	191	Chick peas	0.162732	NA	NA	2.006
2009	9	Argentina	191	Chick peas	0.499561	6.4943	553.014	13.678
2009	235	Uzbekistan	191	Chick peas	0.0198248	38.8169	37.905	1.147
2009	185	Russia	191	Chick peas	0.915932	42.1329	1865.75	12.681
2009	130	Malawi	191	Chick peas	0.0218569	0	40.8505	1.342
2009	28	Myanmar	191	Chick peas	0.209033	0	547.877	9.429
2009	105	Israel	191	Chick peas	0.0294926	29.2567	20.6153	0.486
2009	138	Mexico	191	Chick peas	9.7769	469.291	12798	4.236
2009	33	Canada	191	Chick peas	6.56886	0	11298.4	110.909
2009	231	United States	191	Chick peas	9.24573	0	16808.7	22
2009	149	Nepal	201	Lentils	0.285691	0	1811.85	0.716
2009	41	China	201	Lentils	2.77145	0	8644.15	1.508
2009	102	Iran	201	Lentils	0.197739	NA	NA	0.976
2009	238	Ethiopia	201	Lentils	0.488518	NA	NA	0.815
2009	203	Spain	201	Lentils	0.815553	358.028	3472.62	2.701
2009	100	India	201	Lentils	0.59804	202.138	4587.57	0.881
2009	68	France	201	Lentils	1.91923	301.319	4277.96	5.064
2009	223	Turkey	201	Lentils	50.7838	18942.4	82422.2	1.801
2009	28	Myanmar	201	Lentils	0.196528	0.196528	2235.12	9.429
2009	106	Italy	201	Lentils	0.183063	0	846.299	2.273
2009	185	Russia	201	Lentils	0.105527	17.3065	440.787	12.681
2009	129	Madagascar	201	Lentils	0.277385	0	1342.54	5.758
2009	231	United States	201	Lentils	10.5271	0	18759.2	22
2009	130	Malawi	201	Lentils	0.0842931	0	133.942	1.342
2009	121	Lebanon	201	Lentils	0.583856	0	579.769	0.544
2009	10	Australia	201	Lentils	0.663919	0	1696.98	53.268
2009	212	Syria	201	Lentils	0.0292801	8.54978	46.3211	0.976
2009	33	Canada	201	Lentils	100.445	0	242174	110.909
2009	11	Austria	211	Pulses, nes	10.7481	0	14660.4	2.873
2009	68	France	211	Pulses, nes	43.2671	1687.42	24835.3	5.064
2009	173	Poland	211	Pulses, nes	360.058	0	382741	3.103
2009	154	NA	211	Pulses, nes	0.0360349	NA	NA	NA
2009	27	Bulgaria	211	Pulses, nes	0.0457029	0	0	4.006
2009	199	Slovak Republic	211	Pulses, nes	0.417665	0	599.35	3.987
2009	59	Egypt	211	Pulses, nes	0.179062	450.52	86.1288	1.681
2009	256	Luxembourg	211	Pulses, nes	0.013959	0.013959	15.313	1.954
2009	222	Tunisia	211	Pulses, nes	0.0275948	1.18657	46.8283	0.869
2009	63	Estonia	211	Pulses, nes	0.0220034	0	0	8.345
2009	215	Tanzania	211	Pulses, nes	0.09429	NA	NA	2.006
2009	126	Lithuania	211	Pulses, nes	66.2398	0	80083.9	8.15
2009	100	India	211	Pulses, nes	1.62579	559.272	3402.78	0.881
2009	159	Nigeria	211	Pulses, nes	0.10189	0	153.141	2.328
2009	41	China	211	Pulses, nes	1.33933	0	1970.16	1.508
2009	229	United Kingdom	211	Pulses, nes	130.181	0	74333.5	5.868
2009	79	Germany	211	Pulses, nes	39.7864	0	47345.8	3.061
2009	165	Pakistan	211	Pulses, nes	0.0139568	4.14516	16.148	0.594
2009	185	Russia	211	Pulses, nes	0.0825673	9.24754	230.28	12.681
2009	203	Spain	211	Pulses, nes	28.0626	6398.27	97377.1	2.701
2009	230	Ukraine	211	Pulses, nes	0.113301	0	223.884	4.3
2009	143	Morocco	211	Pulses, nes	0.0400711	18.1122	96.0906	0.939
2009	106	Italy	211	Pulses, nes	3.4754	0	0	2.273
2009	223	Turkey	211	Pulses, nes	0.350672	90.1227	717.125	1.801
2009	84	Greece	211	Pulses, nes	0.961174	334.489	1231.26	4.259
2009	167	Czech Republic	211	Pulses, nes	8.34237	0	13815	3.932
2009	54	Denmark	211	Pulses, nes	25.3589	0	14860.3	7.856
2009	19	Bolivia	216	Brazil nuts, with shell	30.2448	0	0	11.75
2009	21	Brazil	216	Brazil nuts, with shell	0.966289	0	0	16.749
2009	170	Peru	216	Brazil nuts, with shell	0.644291	0	16752.9	7.61
2009	233	Burkina Faso	217	Cashew nuts, with shell	1.48433	1359.64	23955.6	0.973
2009	107	Cote d'Ivoire	217	Cashew nuts, with shell	40.8565	NA	NA	2.937
2009	75	Gambia	217	Cashew nuts, with shell	3.32783	0	0	2.186
2009	217	Togo	217	Cashew nuts, with shell	0.0339038	2.6445	257.127	1.598
2009	175	Guinea-Bissau	217	Cashew nuts, with shell	10.7392	NA	NA	5.398
2009	171	Philippines	217	Cashew nuts, with shell	0.0270276	0	171.382	3.939
2009	38	Sri Lanka	217	Cashew nuts, with shell	0.141537	0	5854.13	2.1
2009	90	Guinea	217	Cashew nuts, with shell	1.52001	62.3206	13637.6	2.492
2009	159	Nigeria	217	Cashew nuts, with shell	5.39963	253.783	25426.9	2.328
2009	100	India	217	Cashew nuts, with shell	58.7286	123271	676671	0.881
2009	129	Madagascar	217	Cashew nuts, with shell	0.630237	0	12168.6	5.758
2009	133	Mali	217	Cashew nuts, with shell	0.127421	0	0	3.605
2009	144	Mozambique	217	Cashew nuts, with shell	14.4336	0	77378.3	3.451
2009	101	Indonesia	217	Cashew nuts, with shell	10.5319	0	656221	16.287
2009	53	Benin	217	Cashew nuts, with shell	10.02	50.1002	373527	2.331
2009	81	Ghana	217	Cashew nuts, with shell	6.80917	0	152165	2.981
2009	237	Vietnam	217	Cashew nuts, with shell	221.972	11542.6	979119	3.809
2009	114	Kenya	217	Cashew nuts, with shell	0.192836	3.85673	217.905	1.018
2009	138	Mexico	217	Cashew nuts, with shell	0.467455	1531.38	2935.15	4.236
2009	21	Brazil	217	Cashew nuts, with shell	58.3028	290698	1.60583e+06	16.749
2009	215	Tanzania	217	Cashew nuts, with shell	17.5834	NA	NA	2.006
2009	95	Honduras	217	Cashew nuts, with shell	0.259926	97.2123	1633.89	4.51
2009	60	El Salvador	217	Cashew nuts, with shell	0.0569106	0	632.22	4.51
2009	195	Senegal	217	Cashew nuts, with shell	1.19312	3648.56	19527.8	1.544
2009	216	Thailand	217	Cashew nuts, with shell	0.0741261	62.1918	701.158	3.613
2009	223	Turkey	220	Chestnut	0.0240867	18.9322	91.0478	1.801
2009	68	France	220	Chestnut	0.423559	259.218	1410.88	5.064
2009	106	Italy	220	Chestnut	1.26838	636.729	3248.33	2.273
2009	203	Spain	220	Chestnut	0.258702	317.427	932.102	2.701
2009	3	Albania	220	Chestnut	0.0227791	26.5377	50.9114	4.4
2009	117	South Korea	220	Chestnut	0.0507738	NA	NA	1.14
2009	41	China	220	Chestnut	7.71573	416.649	10300.5	1.508
2009	173	Poland	220	Chestnut	0.0700688	0	0	3.103
2009	174	Portugal	220	Chestnut	0.133529	86.1263	822.005	2.74
2009	80	Bosnia and Herzegovina	220	Chestnut	0.012468	0	0	4.4
2009	68	France	221	Almonds, with shell	0.0970866	21.7474	155.047	5.064
2009	106	Italy	221	Almonds, with shell	88.7341	66816.8	407645	2.273
2009	4	Algeria	221	Almonds, with shell	0.0223305	40.0163	108.102	0.85
2009	212	Syria	221	Almonds, with shell	0.224693	107.628	190.09	0.976
2009	165	Pakistan	221	Almonds, with shell	0.0469869	54.8808	59.5325	0.594
2009	223	Turkey	221	Almonds, with shell	0.198892	73.5901	397.386	1.801
2009	40	Chile	221	Almonds, with shell	1.5214	2663.98	6742.86	21.914
2009	102	Iran	221	Almonds, with shell	0.167909	NA	NA	0.976
2009	84	Greece	221	Almonds, with shell	1.44468	1238.09	4035	4.259
2009	174	Portugal	221	Almonds, with shell	0.652413	751.58	8395.26	2.74
2009	203	Spain	221	Almonds, with shell	181.306	181306	2.3713e+06	2.701
2009	2	Afghanistan	221	Almonds, with shell	0.0193161	98.6471	38.5355	0.853
2009	10	Australia	221	Almonds, with shell	43.0553	57737.2	105270	53.268
2009	41	China	221	Almonds, with shell	0.144044	14.8365	452.298	1.508
2009	143	Morocco	221	Almonds, with shell	1.76132	2282.67	15045.2	0.939
2009	231	United States	221	Almonds, with shell	391.589	798059	458551	22
2009	165	Pakistan	222	Walnuts, with shell	0.0591232	30.5667	28.9113	0.594
2009	199	Slovak Republic	222	Walnuts, with shell	0.0710418	13.2848	389.522	3.987
2009	230	Ukraine	222	Walnuts, with shell	4.80201	0	6146.58	4.3
2009	27	Bulgaria	222	Walnuts, with shell	0.0751061	5.78317	562.319	4.006
2009	223	Turkey	222	Walnuts, with shell	0.241663	136.781	658.047	1.801
2009	50	Cyprus	222	Walnuts, with shell	0.0567524	762.411	346.36	NA
2009	68	France	222	Walnuts, with shell	15.2152	9022.63	49069.1	5.064
2009	231	United States	222	Walnuts, with shell	75.4175	149251	103624	22
2009	79	Germany	222	Walnuts, with shell	18.0022	162.02	31269.8	3.061
2009	203	Spain	222	Walnuts, with shell	0.170609	132.734	389.671	2.701
2009	138	Mexico	222	Walnuts, with shell	4.9895	15307.8	28979	4.236
2009	9	Argentina	222	Walnuts, with shell	0.202519	182.875	614.848	13.678
2009	97	Hungary	222	Walnuts, with shell	0.960846	109.536	4630.32	4.007
2009	183	Romania	222	Walnuts, with shell	0.525986	1.57796	193.563	4.002
2009	173	Poland	222	Walnuts, with shell	3.46849	3.46849	8157.9	3.103
2009	11	Austria	222	Walnuts, with shell	0.452792	46.1848	1043.23	2.873
2009	146	Moldova	222	Walnuts, with shell	3.52396	214.962	7632.9	4.089
2009	2	Afghanistan	222	Walnuts, with shell	0.235449	1339.47	449.001	0.853
2009	100	India	222	Walnuts, with shell	8.64901	13587.6	77296.2	0.881
2009	167	Czech Republic	222	Walnuts, with shell	0.012674	1.28008	45.1195	3.932
2009	113	Kyrgyz Republic	222	Walnuts, with shell	0.19848	184.586	276.68	1.352
2009	84	Greece	222	Walnuts, with shell	0.141801	92.4542	306.006	4.259
2009	40	Chile	222	Walnuts, with shell	5.11579	16651.9	22535	21.914
2009	21	Brazil	222	Walnuts, with shell	0.0145069	1.6828	107.279	16.749
2009	255	Belgium	222	Walnuts, with shell	0.02005	0.2005	50.0447	2.037
2009	41	China	222	Walnuts, with shell	0.815006	132.846	3264.92	1.508
2009	106	Italy	222	Walnuts, with shell	2.51177	891.678	4548.81	2.273
2009	102	Iran	223	Pistachios	39.9299	NA	NA	0.976
2009	212	Syria	223	Pistachios	0.506549	903.177	1079.46	0.976
2009	129	Madagascar	223	Pistachios	0.026629	0	466.992	5.758
2009	231	United States	223	Pistachios	168.107	362775	159870	22
2009	41	China	223	Pistachios	1.78345	324.588	5814.04	1.508
2009	223	Turkey	223	Pistachios	1.61876	1204.35	4511.47	1.801
2009	10	Australia	223	Pistachios	0.0441713	0	0	53.268
2009	106	Italy	223	Pistachios	0.22946	360.94	1453.4	2.273
2009	222	Tunisia	223	Pistachios	0.567974	6828.18	45928.1	0.869
2009	84	Greece	223	Pistachios	0.894284	764.613	1894.09	4.259
2009	107	Cote d'Ivoire	223	Pistachios	0.0245439	NA	NA	2.937
2009	2	Afghanistan	223	Pistachios	1.1856	11746.9	3363.55	0.853
2009	84	Greece	225	Hazelnuts, with shell	0.0371485	27.6013	91.0138	4.259
2009	106	Italy	225	Hazelnuts, with shell	22.2497	16731.8	85394.3	2.273
2009	203	Spain	225	Hazelnuts, with shell	0.79438	1702.36	4998.24	2.701
2009	68	France	225	Hazelnuts, with shell	2.96155	1658.47	9026.79	5.064
2009	231	United States	225	Hazelnuts, with shell	0.0682674	173.536	121.994	22
2009	52	Azerbaijan	225	Hazelnuts, with shell	2.05909	5057.12	12228.9	1.916
2009	173	Poland	225	Hazelnuts, with shell	0.204938	0.409876	912.588	3.103
2009	73	Georgia	225	Hazelnuts, with shell	7.95153	3148.81	31337	2.01
2009	223	Turkey	225	Hazelnuts, with shell	72.4232	55983.1	269342	1.801
2009	10	Australia	234	Nuts, nes	53.9249	77328.3	99707.2	53.268
2009	102	Iran	234	Nuts, nes	3.4849	NA	NA	0.976
2009	107	Cote d'Ivoire	234	Nuts, nes	2.15959	NA	NA	2.937
2009	59	Egypt	234	Nuts, nes	6.32036	31665	6383.56	1.681
2009	103	Iraq	234	Nuts, nes	1.08953	0	0	0.675
2009	106	Italy	234	Nuts, nes	11.4011	8642.05	44145.1	2.273
2009	174	Portugal	234	Nuts, nes	67.5795	50076.4	478193	2.74
2009	53	Benin	234	Nuts, nes	0.0302115	0	674.624	2.331
2009	171	Philippines	234	Nuts, nes	31.8205	0	371663	3.939
2009	90	Guinea	234	Nuts, nes	0.0407755	0	0	2.492
2009	3	Albania	234	Nuts, nes	2.58203	7322.63	14043.7	4.4
2009	231	United States	234	Nuts, nes	215.165	512522	444530	22
2009	116	North Korea	234	Nuts, nes	8.58943	NA	NA	1.141
2009	237	Vietnam	234	Nuts, nes	2.50412	152.752	16897.8	3.809
2009	216	Thailand	234	Nuts, nes	105.98	75670	1.03405e+06	3.613
2009	133	Mali	234	Nuts, nes	0.0195287	38.4325	185.796	3.605
2009	185	Russia	234	Nuts, nes	39.8741	0	72132.2	12.681
2009	105	Israel	234	Nuts, nes	8.77338	47534.2	19915.6	0.486
2009	114	Kenya	234	Nuts, nes	14.8102	488.737	29265	1.018
2009	230	Ukraine	234	Nuts, nes	0.236523	0	1320.51	4.3
2009	41	China	234	Nuts, nes	217.158	21281.5	521831	1.508
2009	212	Syria	234	Nuts, nes	8.48752	6959.76	11534.5	0.976
2009	223	Turkey	234	Nuts, nes	1096.61	489087	2.34893e+06	1.801
2009	121	Lebanon	234	Nuts, nes	61.1766	88461.4	103327	0.544
2009	103	Iraq	234	Nuts, nes	1.08953	0	0	0.675
2009	81	Ghana	234	Nuts, nes	3.38745	0	256955	2.981
2009	195	Senegal	234	Nuts, nes	0.126418	105.18	606.806	1.544
2009	213	Turkmenistan	234	Nuts, nes	0.326757	716.905	695.339	2.688
2009	165	Pakistan	234	Nuts, nes	19.2279	53530.5	50646.4	0.594
2009	198	Slovenia	234	Nuts, nes	0.633224	6.96547	1398.16	4.224
2009	141	Mongolia	234	Nuts, nes	0.226902	161.327	467.191	8.853
2009	146	Moldova	234	Nuts, nes	2.62502	199.501	7037.67	4.089
2009	57	Belarus	234	Nuts, nes	0.749133	0	2537.31	5.092
2009	32	Cameroon	234	Nuts, nes	0.0376023	0	0	4.848
2009	44	Colombia	234	Nuts, nes	2.18692	137.776	8465.55	9.648
2009	117	South Korea	234	Nuts, nes	0.836818	NA	NA	1.14
2009	2	Afghanistan	234	Nuts, nes	0.110537	1041.37	349.077	0.853
2009	202	South Africa	234	Nuts, nes	78.8781	159570	155784	2.449
2009	238	Ethiopia	234	Nuts, nes	1.13348	NA	NA	0.815
2009	13	Bahrain	234	Nuts, nes	0.0162942	163.219	19.3412	0.53
2009	181	Zimbabwe	234	Nuts, nes	1.61185	1490.96	10535.1	1.66
2009	52	Azerbaijan	234	Nuts, nes	8.53036	14808.7	35801.9	1.916
2009	170	Peru	234	Nuts, nes	0.823787	1706.06	3519.22	7.61
2009	138	Mexico	234	Nuts, nes	90.144	218058	541495	4.236
2009	173	Poland	234	Nuts, nes	0.177391	0	0	3.103
2009	21	Brazil	234	Nuts, nes	61.7856	72845.2	855545	16.749
2009	103	Iraq	234	Nuts, nes	1.08953	0	0	0.675
2009	143	Morocco	234	Nuts, nes	0.501065	0	0	0.939
2009	101	Indonesia	234	Nuts, nes	168.668	0	5.88568e+06	16.287
2009	130	Malawi	234	Nuts, nes	8.71859	15292.4	58083.2	1.342
2009	89	Guatemala	234	Nuts, nes	5.10852	76.6278	12045.9	4.459
2009	48	Costa Rica	234	Nuts, nes	4.79484	5116.1	90828.7	4.51
2009	73	Georgia	234	Nuts, nes	0.906975	467.999	4664.57	2.01
2009	203	Spain	234	Nuts, nes	52.0198	40939.6	120114	2.701
2009	27	Bulgaria	234	Nuts, nes	2.5715	82.2879	7920.22	4.006
2009	40	Chile	234	Nuts, nes	37.2599	0	0	21.914
2009	222	Tunisia	234	Nuts, nes	0.0135592	0	0	0.869
2009	235	Uzbekistan	234	Nuts, nes	0.0361548	76.4313	45.302	1.147
2009	159	Nigeria	234	Nuts, nes	0.191577	8.81254	955.777	2.328
2009	215	Tanzania	234	Nuts, nes	2.79339	NA	NA	2.006
2009	103	Iraq	234	Nuts, nes	1.08953	0	0	0.675
2009	89	Guatemala	236	Soybeans	0.0580033	0	87.005	4.459
2009	217	Togo	236	Soybeans	0.0185344	0	0	1.598
2009	231	United States	236	Soybeans	11189	1.02939e+06	1.74549e+07	22
2009	80	Bosnia and Herzegovina	236	Soybeans	0.142526	0	347.337	4.4
2009	203	Spain	236	Soybeans	0.622503	1633.45	430.15	2.701
2009	19	Bolivia	236	Soybeans	12.7614	0	38348	11.75
2009	251	Zambia	236	Soybeans	1.58903	0	5097.61	5.161
2009	138	Mexico	236	Soybeans	0.073111	32.0226	228.764	4.236
2009	33	Canada	236	Soybeans	2736.04	0	3.92075e+06	110.909
2009	108	Kazakhstan	236	Soybeans	0.926777	0	1351.24	11.614
2009	10	Australia	236	Soybeans	2.71488	0	5141.98	53.268
2009	237	Vietnam	236	Soybeans	0.0441354	0	125.301	3.809
2009	159	Nigeria	236	Soybeans	0.0719393	0	409.334	2.328
2009	173	Poland	236	Soybeans	0.317501	0	1207.46	3.103
2009	9	Argentina	236	Soybeans	39773	198865	8.32847e+07	13.678
2009	211	Switzerland	236	Soybeans	0.49235	0	689.782	1.642
2009	183	Romania	236	Soybeans	2.24225	1444.01	4477.78	4.002
2009	199	Slovak Republic	236	Soybeans	0.733361	110.737	1889.14	3.987
2009	84	Greece	236	Soybeans	0.551454	30.8814	690.421	4.259
2009	234	Uruguay	236	Soybeans	1574.26	9445.59	4.89911e+06	14.962
2009	98	Croatia	236	Soybeans	4.36894	0	8366.53	4.398
2009	185	Russia	236	Soybeans	58.3825	0	233939	12.681
2009	110	Japan	236	Soybeans	0.871107	0	2574.99	3.555
2009	68	France	236	Soybeans	59.3505	26529.7	88966.3	5.064
2009	100	India	236	Soybeans	175.031	4025.72	742483	0.881
2009	11	Austria	236	Soybeans	83.4361	0	135250	2.873
2009	198	Slovenia	236	Soybeans	0.0319961	0	62.0724	4.224
2009	167	Czech Republic	236	Soybeans	11.2237	0	27363.4	3.932
2009	181	Zimbabwe	236	Soybeans	0.123596	15.5731	295.518	1.66
2009	27	Bulgaria	236	Soybeans	0.0158851	0.127081	77.8688	4.006
2009	21	Brazil	236	Soybeans	101637	101637	2.2167e+08	16.749
2009	216	Thailand	236	Soybeans	54.6551	0	139917	3.613
2009	272	Serbia	236	Soybeans	18.2999	NA	NA	4.37
2009	41	China	236	Soybeans	67.8711	16899.9	173003	1.508
2009	117	South Korea	236	Soybeans	0.156185	NA	NA	1.14
2009	169	Paraguay	236	Soybeans	4751.48	0	1.18407e+07	15.566
2009	157	Nicaragua	236	Soybeans	0.0198991	0	27.8189	4.51
2009	120	Lao	236	Soybeans	0.0236409	NA	NA	8.865
2009	230	Ukraine	236	Soybeans	408.164	0	1.18613e+06	4.3
2009	223	Turkey	236	Soybeans	0.293886	0	288.89	1.801
2009	79	Germany	236	Soybeans	4.9738	0	9703.88	3.061
2009	226	Uganda	236	Soybeans	0.0265475	0	92.6243	1.578
2009	97	Hungary	236	Soybeans	27.647	165.882	52584.6	4.007
2009	146	Moldova	236	Soybeans	3.77681	3.77681	11315.3	4.089
2009	202	South Africa	236	Soybeans	4.10127	360.912	11233.4	2.449
2009	115	Cambodia	236	Soybeans	14.4776	0	56448	9.505
2009	101	Indonesia	236	Soybeans	1.89341	397.615	7456.23	16.287
2009	106	Italy	236	Soybeans	159.279	20865.6	183649	2.273
2009	59	Egypt	236	Soybeans	0.144852	224.666	47.8012	1.681
2009	81	Ghana	242	Groundnuts, with shell	0.399087	0	1728.85	2.981
2009	237	Vietnam	242	Groundnuts, with shell	1.21429	0	3652.59	3.809
2009	143	Morocco	242	Groundnuts, with shell	0.013453	15.2557	10.8835	0.939
2009	138	Mexico	242	Groundnuts, with shell	0.041772	0	121.682	4.236
2009	231	United States	242	Groundnuts, with shell	231.547	58581.5	291055	22
2009	202	South Africa	242	Groundnuts, with shell	162.041	70488	358112	2.449
2009	41	China	242	Groundnuts, with shell	764.434	64976.9	1.05721e+06	1.508
2009	171	Philippines	242	Groundnuts, with shell	0.0878773	0	0	3.939
2009	169	Paraguay	242	Groundnuts, with shell	11.1071	0	63166.3	15.566
2009	251	Zambia	242	Groundnuts, with shell	0.0364436	0	297.452	5.161
2009	203	Spain	242	Groundnuts, with shell	0.0637364	0	51.7539	2.701
2009	75	Gambia	242	Groundnuts, with shell	16.6655	0	60945.6	2.186
2009	130	Malawi	242	Groundnuts, with shell	1.38277	0	7995.18	1.342
2009	144	Mozambique	242	Groundnuts, with shell	1.92051	0	20553.3	3.451
2009	19	Bolivia	242	Groundnuts, with shell	0.107605	0	428.915	11.75
2009	214	Taiwan	242	Groundnuts, with shell	0.123599	NA	NA	2
2009	159	Nigeria	242	Groundnuts, with shell	0.278539	0	773.224	2.328
2009	194	Saudi Arabia	242	Groundnuts, with shell	0.031925	46.5147	3.60752	0.479
2009	90	Guinea	242	Groundnuts, with shell	0.0145289	0	61.2975	2.492
2009	20	Botswana	242	Groundnuts, with shell	0.261027	0	3046.19	7.297
2009	215	Tanzania	242	Groundnuts, with shell	0.0218864	NA	NA	2.006
2009	27	Bulgaria	242	Groundnuts, with shell	0.326354	0	1408.54	4.006
2009	110	Japan	242	Groundnuts, with shell	0.0338295	0	0	3.555
2009	157	Nicaragua	242	Groundnuts, with shell	21.5143	0	20718.2	4.51
2009	233	Burkina Faso	242	Groundnuts, with shell	0.333371	0	1717.86	0.973
2009	59	Egypt	242	Groundnuts, with shell	0.569631	1055.53	147.534	1.681
2009	105	Israel	242	Groundnuts, with shell	0.111779	82.94	9.38944	0.486
2009	121	Lebanon	242	Groundnuts, with shell	0.0111799	21.9127	2.29189	0.544
2009	84	Greece	242	Groundnuts, with shell	0.151233	0	94.0668	4.259
2009	9	Argentina	242	Groundnuts, with shell	1529.21	68814.5	5.13356e+06	13.678
2009	165	Pakistan	242	Groundnuts, with shell	0.0206156	0	59.6821	0.594
2009	120	Lao	242	Groundnuts, with shell	0.575979	NA	NA	8.865
2009	114	Kenya	242	Groundnuts, with shell	0.0152446	0	35.3369	1.018
2009	101	Indonesia	242	Groundnuts, with shell	0.104738	0	271.899	16.287
2009	181	Zimbabwe	242	Groundnuts, with shell	0.0878161	4.30299	216.203	1.66
2009	21	Brazil	242	Groundnuts, with shell	682.422	2047.27	1.89509e+06	16.749
2009	206	NA	242	Groundnuts, with shell	1.44626	569.825	7831.48	NA
2009	10	Australia	242	Groundnuts, with shell	43.9726	32188	74709.5	53.268
2009	223	Turkey	242	Groundnuts, with shell	0.155716	193.867	95.2985	1.801
2009	195	Senegal	242	Groundnuts, with shell	64.7968	0	249079	1.544
2009	216	Thailand	242	Groundnuts, with shell	5.03121	0	15375.4	3.613
2009	100	India	242	Groundnuts, with shell	21.4167	7281.66	61487.2	0.881
2009	217	Togo	242	Groundnuts, with shell	9.2876	0	68904.7	1.598
2009	234	Uruguay	242	Groundnuts, with shell	0.475011	0	3559.25	14.962
2009	41	China	249	Coconuts	0.0384546	0	30.4176	1.508
2009	66	Fiji	249	Coconuts	1.3103	NA	NA	NA
2009	138	Mexico	249	Coconuts	0.0837933	0	130.466	4.236
2009	131	Malaysia	249	Coconuts	95.3914	0	398832	25.815
2009	81	Ghana	249	Coconuts	0.0446143	0	77.5843	2.981
2009	216	Thailand	249	Coconuts	33.8346	0	82319.6	3.613
2009	107	Cote d'Ivoire	249	Coconuts	4.26259	NA	NA	2.937
2009	195	Senegal	249	Coconuts	0.0138117	0	28.0102	1.544
2009	244	Samoa	249	Coconuts	0.0344382	0	70.2195	NA
2009	197	Sierra Leone	249	Coconuts	0.0154245	0	187.87	2.658
2009	48	Costa Rica	249	Coconuts	0.798563	0	2039.53	4.51
2009	168	Papua New Guinea	249	Coconuts	17.2068	0	60929.2	118.694
2009	56	Dominican Republic	249	Coconuts	0.108194	0	319.28	1.03
2009	237	Vietnam	249	Coconuts	0.645562	0	1165.24	3.809
2009	70	French Polynesia	249	Coconuts	2.01614	0	6167.38	NA
2009	176	Timor-Leste	249	Coconuts	0.0124518	0	0	1.562
2009	83	Kiribati	249	Coconuts	0.0479497	0	130.711	NA
2009	166	Panama	249	Coconuts	0.0384893	0	117.739	4.505
2009	38	Sri Lanka	249	Coconuts	3.47741	0	10133.2	2.1
2009	171	Philippines	249	Coconuts	1217.76	0	3.97356e+06	3.939
2009	101	Indonesia	249	Coconuts	2713.21	0	6.73691e+06	16.287
2009	100	India	249	Coconuts	0.928114	0	2284.09	0.881
2009	21	Brazil	249	Coconuts	0.148969	3.42628	180.848	16.749
2009	217	Togo	254	Oil, palm fruit	0.0956307	0	102.899	1.598
2009	90	Guinea	254	Oil, palm fruit	0.196386	1.17832	719.363	2.492
2009	131	Malaysia	254	Oil, palm fruit	179295	0	1.47739e+08	25.815
2009	89	Guatemala	254	Oil, palm fruit	59.0978	0	33390.3	4.459
2009	123	Liberia	254	Oil, palm fruit	1.27155	0	1505.51	5.57
2009	171	Philippines	254	Oil, palm fruit	0.350715	0	355.625	3.939
2009	170	Peru	254	Oil, palm fruit	0.0129321	0	4.44865	7.61
2009	56	Dominican Republic	254	Oil, palm fruit	0.0221889	0	16.2867	1.03
2009	157	Nicaragua	254	Oil, palm fruit	0.0213686	0	8.5047	4.51
2009	41	China	254	Oil, palm fruit	0.430903	0	205.11	1.508
2009	48	Costa Rica	254	Oil, palm fruit	1.56809	0	1177.64	4.51
2009	53	Benin	254	Oil, palm fruit	0.0404337	0	30.487	2.331
2009	166	Panama	254	Oil, palm fruit	1.24392	0	1348.41	4.505
2009	95	Honduras	254	Oil, palm fruit	188.812	0	135567	4.51
2009	101	Indonesia	254	Oil, palm fruit	41990.4	0	3.79593e+07	16.287
2009	159	Nigeria	254	Oil, palm fruit	7.4395	22.3185	27883.2	2.328
2009	58	Ecuador	254	Oil, palm fruit	67.3273	0	48206.4	2.575
2009	32	Cameroon	254	Oil, palm fruit	0.089756	0	45.9551	4.848
2009	169	Paraguay	254	Oil, palm fruit	0.456061	0	627.54	15.566
2009	81	Ghana	254	Oil, palm fruit	311.06	0	392247	2.981
2009	44	Colombia	254	Oil, palm fruit	287.012	0	182827	9.648
2009	21	Brazil	254	Oil, palm fruit	33.0429	0	37173.2	16.749
2009	197	Sierra Leone	254	Oil, palm fruit	0.0826712	0	105.323	2.658
2009	168	Papua New Guinea	254	Oil, palm fruit	881.245	0	701471	118.694
2009	138	Mexico	254	Oil, palm fruit	0.0151926	0	10.9387	4.236
2009	107	Cote d'Ivoire	254	Oil, palm fruit	346.284	NA	NA	2.937
2009	216	Thailand	254	Oil, palm fruit	404.386	0	275792	3.613
2009	215	Tanzania	254	Oil, palm fruit	0.0133706	NA	NA	2.006
2009	231	United States	260	Olives	0.0850171	46.3343	38.5978	22
2009	170	Peru	260	Olives	27.2667	12788.1	34846.8	7.61
2009	212	Syria	260	Olives	1.18041	1427.11	3031.29	0.976
2009	112	Jordan	260	Olives	0.362001	396.392	629.159	0.108
2009	3	Albania	260	Olives	0.517501	89.5276	2546.1	4.4
2009	223	Turkey	260	Olives	26.1336	7056.06	56762.1	1.801
2009	106	Italy	260	Olives	1288.19	162312	2.28268e+06	2.273
2009	174	Portugal	260	Olives	33.0073	4257.94	242967	2.74
2009	121	Lebanon	260	Olives	0.861413	1030.25	1587.58	0.544
2009	299	NA	260	Olives	0.424427	89.5541	1446.87	NA
2009	59	Egypt	260	Olives	29.8512	47284.4	10089.7	1.681
2009	198	Slovenia	260	Olives	0.0141489	0	29.6845	4.224
2009	143	Morocco	260	Olives	40.0679	55413.9	142642	0.939
2009	124	Libya	260	Olives	0.113284	385.391	269.162	1.143
2009	203	Spain	260	Olives	4780.62	2.56719e+06	1.05795e+07	2.701
2009	105	Israel	260	Olives	0.135263	115.514	253.617	0.486
2009	222	Tunisia	260	Olives	94.0252	30558.2	826482	0.869
2009	154	NA	260	Olives	0.0541626	NA	NA	NA
2009	9	Argentina	260	Olives	0.898958	894.463	1483.28	13.678
2009	68	France	260	Olives	2.7023	778.263	12576.5	5.064
2009	84	Greece	260	Olives	1358.09	296063	1.80083e+06	4.259
2009	10	Australia	260	Olives	0.864747	430.644	1243.51	53.268
2009	102	Iran	260	Olives	0.0453867	NA	NA	0.976
2009	50	Cyprus	260	Olives	7.14432	8258.83	13595.6	NA
2009	40	Chile	260	Olives	1.86045	1374.87	3319.04	21.914
2009	98	Croatia	260	Olives	0.0153059	0.0153059	53.1269	4.398
2009	100	India	265	Castor oil seed	4951.94	7.04166e+06	3.77536e+07	0.881
2009	169	Paraguay	265	Castor oil seed	2.41898	0	21316.1	15.566
2009	21	Brazil	265	Castor oil seed	0.483363	744.863	4882.94	16.749
2009	212	Syria	265	Castor oil seed	0.0139161	0	0	0.976
2009	41	China	265	Castor oil seed	0.140968	43.8412	1016.95	1.508
2009	105	Israel	267	Sunflower seed	0.345571	1166.3	198.358	0.486
2009	223	Turkey	267	Sunflower seed	16.0676	4177.58	26029.5	1.801
2009	216	Thailand	267	Sunflower seed	5.55871	0	35258.9	3.613
2009	84	Greece	267	Sunflower seed	3.88772	2492.03	8595.74	4.259
2009	234	Uruguay	267	Sunflower seed	22.1764	510.058	82385.4	14.962
2009	21	Brazil	267	Sunflower seed	5.69951	0	23812.5	16.749
2009	231	United States	267	Sunflower seed	647.933	73864.3	2.03581e+06	22
2009	33	Canada	267	Sunflower seed	14.3763	18315.4	36947.1	110.909
2009	199	Slovak Republic	267	Sunflower seed	148.489	7869.89	309302	3.987
2009	108	Kazakhstan	267	Sunflower seed	0.167917	0	764.525	11.614
2009	113	Kyrgyz Republic	267	Sunflower seed	0.0353443	13.3601	65.917	1.352
2009	154	NA	267	Sunflower seed	1.22326	NA	NA	NA
2009	203	Spain	267	Sunflower seed	102.095	92191.7	254318	2.701
2009	167	Czech Republic	267	Sunflower seed	74.3337	0	129489	3.932
2009	98	Croatia	267	Sunflower seed	10.5993	0	22067.7	4.398
2009	185	Russia	267	Sunflower seed	1736.88	13895	6.0565e+06	12.681
2009	11	Austria	267	Sunflower seed	68.0254	0	104079	2.873
2009	169	Paraguay	267	Sunflower seed	54.2372	0	228664	15.566
2009	19	Bolivia	267	Sunflower seed	44.3379	0	226922	11.75
2009	174	Portugal	267	Sunflower seed	2.2092	7630.59	12517.3	2.74
2009	198	Slovenia	267	Sunflower seed	0.0536463	0	146.937	4.224
2009	20	Botswana	267	Sunflower seed	0.0744965	0	232.057	7.297
2009	173	Poland	267	Sunflower seed	6.18328	0	13998.9	3.103
2009	215	Tanzania	267	Sunflower seed	10.4198	NA	NA	2.006
2009	202	South Africa	267	Sunflower seed	1.42096	100.888	4100.88	2.449
2009	41	China	267	Sunflower seed	88.7736	30271.8	200096	1.508
2009	146	Moldova	267	Sunflower seed	151.471	1666.18	431389	4.089
2009	68	France	267	Sunflower seed	961.442	10575.9	1.1845e+06	5.064
2009	80	Bosnia and Herzegovina	267	Sunflower seed	0.0535513	0	382.945	4.4
2009	52	Azerbaijan	267	Sunflower seed	0.437486	0	833.848	1.916
2009	59	Egypt	267	Sunflower seed	4.18706	3789.29	1913.49	1.681
2009	58	Ecuador	267	Sunflower seed	0.0496936	4.96936	120.01	2.575
2009	79	Germany	267	Sunflower seed	74.4647	0	119144	3.061
2009	230	Ukraine	267	Sunflower seed	3511.25	84270	1.09411e+07	4.3
2009	251	Zambia	267	Sunflower seed	0.0303344	0	268.096	5.161
2009	57	Belarus	267	Sunflower seed	1.50174	0	3030.51	5.092
2009	222	Tunisia	267	Sunflower seed	0.10633	0	328.877	0.869
2009	10	Australia	267	Sunflower seed	0.698839	0	2844.98	53.268
2009	27	Bulgaria	267	Sunflower seed	8548.9	85489	2.62793e+07	4.006
2009	183	Romania	267	Sunflower seed	300.374	34843.3	903223	4.002
2009	100	India	267	Sunflower seed	0.781307	474.253	6631.74	0.881
2009	106	Italy	267	Sunflower seed	45.3643	3084.77	80340.2	2.273
2009	235	Uzbekistan	267	Sunflower seed	0.0165775	22.4625	26.2091	1.147
2009	211	Switzerland	267	Sunflower seed	0.53698	0	638.469	1.642
2009	97	Hungary	267	Sunflower seed	1474.22	2948.45	2.78186e+06	4.007
2009	165	Pakistan	267	Sunflower seed	0.241623	0	567.089	0.594
2009	143	Morocco	267	Sunflower seed	0.0154846	44.0226	46.113	0.939
2009	272	Serbia	267	Sunflower seed	34.685	NA	NA	4.37
2009	9	Argentina	267	Sunflower seed	744.798	8192.78	1.9901e+06	13.678
2009	226	Uganda	267	Sunflower seed	0.101354	0	445.248	1.578
2009	40	Chile	267	Sunflower seed	0.463859	0	943.026	21.914
2009	114	Kenya	267	Sunflower seed	0.328075	0	1283.43	1.018
2009	110	Japan	27	Rice, paddy	3.03544	519.06	1748.41	3.555
2009	102	Iran	27	Rice, paddy	0.150564	NA	NA	0.976
2009	131	Malaysia	27	Rice, paddy	0.162081	91.5755	377.648	25.815
2009	220	Trinidad and Tobago	27	Rice, paddy	0.0153341	0.41402	24.9485	15.602
2009	97	Hungary	27	Rice, paddy	2.03587	1575.76	1653.12	4.007
2009	237	Vietnam	27	Rice, paddy	227.784	36673.1	233706	3.809
2009	106	Italy	27	Rice, paddy	12197.2	5.39114e+06	7.08655e+06	2.273
2009	59	Egypt	27	Rice, paddy	155.205	155671	9157.1	1.681
2009	44	Colombia	27	Rice, paddy	0.0335917	11.8914	36.1782	9.648
2009	216	Thailand	27	Rice, paddy	5195.62	1.95355e+06	9.48201e+06	3.613
2009	183	Romania	27	Rice, paddy	32.8565	28026.6	29735.1	4.002
2009	114	Kenya	27	Rice, paddy	0.0169627	12.4167	18.0652	1.018
2009	100	India	27	Rice, paddy	843.131	381095	1.17532e+06	0.881
2009	28	Myanmar	27	Rice, paddy	3.05684	269.002	6006.69	9.429
2009	129	Madagascar	27	Rice, paddy	0.0493333	38.6773	125.603	5.758
2009	230	Ukraine	27	Rice, paddy	0.0829692	65.4627	54.0959	4.3
2009	207	Suriname	27	Rice, paddy	178.044	64273.7	165759	121.744
2009	117	South Korea	27	Rice, paddy	1.36158	NA	NA	1.14
2009	223	Turkey	27	Rice, paddy	5.20896	4609.93	1573.11	1.801
2009	103	Iraq	27	Rice, paddy	0.0375794	236.638	8.86875	0.675
2009	58	Ecuador	27	Rice, paddy	0.165293	61.6543	226.947	2.575
2009	103	Iraq	27	Rice, paddy	0.0375794	236.638	8.86875	0.675
2009	234	Uruguay	27	Rice, paddy	516.508	319202	387898	14.962
2009	103	Iraq	27	Rice, paddy	0.0375794	236.638	8.86875	0.675
2009	41	China	27	Rice, paddy	33.3031	8192.55	18283.4	1.508
2009	143	Morocco	27	Rice, paddy	15.2046	19431.4	4454.94	0.939
2009	10	Australia	27	Rice, paddy	0.277198	318.777	70.131	53.268
2009	185	Russia	27	Rice, paddy	0.896992	1535.65	718.491	12.681
2009	165	Pakistan	27	Rice, paddy	521.344	1.14279e+06	348258	0.594
2009	103	Iraq	27	Rice, paddy	0.0375794	236.638	8.86875	0.675
2009	2	Afghanistan	27	Rice, paddy	0.0455336	115.837	16.3466	0.853
2009	27	Bulgaria	27	Rice, paddy	12.7167	9321.31	8036.93	4.006
2009	169	Paraguay	27	Rice, paddy	3.52607	1981.65	5289.11	15.566
2009	170	Peru	27	Rice, paddy	0.0112387	4.52922	5.70928	7.61
2009	236	Venezuela	27	Rice, paddy	0.0314475	NA	NA	17.1
2009	231	United States	27	Rice, paddy	146.199	123830	61695.8	22
2009	9	Argentina	27	Rice, paddy	88.6124	39698.3	98005.3	13.678
2009	154	NA	27	Rice, paddy	0.241348	NA	NA	NA
2009	91	Guyana	27	Rice, paddy	581.985	237450	776950	127.073
2009	115	Cambodia	27	Rice, paddy	24.5967	4624.18	59622.4	9.505
2009	68	France	27	Rice, paddy	266.979	211180	135358	5.064
2009	138	Mexico	27	Rice, paddy	0.0261706	9.13353	32.4253	4.236
2009	120	Lao	27	Rice, paddy	0.349717	NA	NA	8.865
2009	174	Portugal	27	Rice, paddy	49.2044	53436	16434.3	2.74
2009	171	Philippines	27	Rice, paddy	0.0249508	5.16482	49.5273	3.939
2009	21	Brazil	27	Rice, paddy	167.029	59462.2	324537	16.749
2009	226	Uganda	27	Rice, paddy	0.106163	2.54792	220.714	1.578
2009	16	Bangladesh	27	Rice, paddy	28.7183	5399.04	38712.3	2.294
2009	84	Greece	27	Rice, paddy	137.817	81587.5	34316.4	4.259
2009	56	Dominican Republic	27	Rice, paddy	0.0187111	15.4741	14.4075	1.03
2009	101	Indonesia	27	Rice, paddy	0.148396	27.008	220.961	16.287
2009	38	Sri Lanka	27	Rice, paddy	22.9078	14409	29024.2	2.1
2009	108	Kazakhstan	27	Rice, paddy	12.2749	40249.4	4480.34	11.614
2009	149	Nepal	27	Rice, paddy	0.131915	25.8553	235.732	0.716
2009	214	Taiwan	27	Rice, paddy	0.418927	NA	NA	2
2009	203	Spain	27	Rice, paddy	3768.15	4.54063e+06	1.28871e+06	2.701
2009	57	Belarus	270	Rapeseed	8966.15	0	4.20064e+07	5.092
2009	230	Ukraine	270	Rapeseed	16223.5	0	6.23957e+07	4.3
2009	63	Estonia	270	Rapeseed	22297.1	0	5.17515e+07	8.345
2009	41	China	270	Rapeseed	31.2281	0	43313.4	1.508
2009	203	Spain	270	Rapeseed	22.8475	1622.17	45740.6	2.701
2009	9	Argentina	270	Rapeseed	150.812	0	527842	13.678
2009	202	South Africa	270	Rapeseed	0.0757401	0	286.07	2.449
2009	198	Slovenia	270	Rapeseed	8.0836	0	13515.8	4.224
2009	98	Croatia	270	Rapeseed	184.066	0	403290	4.398
2009	141	Mongolia	270	Rapeseed	0.769857	0	0	8.853
2009	97	Hungary	270	Rapeseed	5536.69	249151	1.21807e+07	4.007
2009	199	Slovak Republic	270	Rapeseed	1305.07	6525.37	2.41047e+06	3.987
2009	162	Norway	270	Rapeseed	0.649295	0	1170.03	55.393
2009	108	Kazakhstan	270	Rapeseed	5595.79	0	2.60484e+07	11.614
2009	33	Canada	270	Rapeseed	1680.74	0	4.56657e+06	110.909
2009	54	Denmark	270	Rapeseed	5775.63	0	7.06937e+06	7.856
2009	234	Uruguay	270	Rapeseed	0.202439	0	335.644	14.962
2009	255	Belgium	270	Rapeseed	362.837	0	359934	2.037
2009	229	United Kingdom	270	Rapeseed	1993.98	0	2.0857e+06	5.868
2009	156	New Zealand	270	Rapeseed	0.435156	0	954.298	58.852
2009	79	Germany	270	Rapeseed	79421.3	0	8.00567e+07	3.061
2009	165	Pakistan	270	Rapeseed	0.729155	834.154	1037.59	0.594
2009	169	Paraguay	270	Rapeseed	51.9933	0	180313	15.566
2009	113	Kyrgyz Republic	270	Rapeseed	0.0674261	0	191.49	1.352
2009	119	Latvia	270	Rapeseed	23208.2	0	4.54416e+07	8.345
2009	11	Austria	270	Rapeseed	451.242	0	749513	2.873
2009	256	Luxembourg	270	Rapeseed	120.813	0	124800	1.954
2009	27	Bulgaria	270	Rapeseed	2024.2	0	5.9795e+06	4.006
2009	173	Poland	270	Rapeseed	16590.5	0	2.43382e+07	3.103
2009	185	Russia	270	Rapeseed	9494.43	0	3.24615e+07	12.681
2009	272	Serbia	270	Rapeseed	86.963	NA	NA	4.37
2009	68	France	270	Rapeseed	19938.6	99693.2	2.33282e+07	5.064
2009	231	United States	270	Rapeseed	194.079	4075.66	544973	22
2009	84	Greece	270	Rapeseed	0.736293	0	0	4.259
2009	80	Bosnia and Herzegovina	270	Rapeseed	1.25068	0	2650.19	4.4
2009	100	India	270	Rapeseed	74.1726	111852	122682	0.881
2009	167	Czech Republic	270	Rapeseed	7155.72	0	1.11772e+07	3.932
2009	146	Moldova	270	Rapeseed	559.154	0	1.87205e+06	4.089
2009	10	Australia	270	Rapeseed	6701.08	0	1.41058e+07	53.268
2009	40	Chile	270	Rapeseed	8.92925	0	8911.39	21.914
2009	223	Turkey	270	Rapeseed	3.75735	0	4786.87	1.801
2009	104	Ireland	270	Rapeseed	48.7472	0	54791.8	19.74
2009	211	Switzerland	270	Rapeseed	13.715	0	15470.5	1.642
2009	126	Lithuania	270	Rapeseed	17086.8	0	3.64119e+07	8.15
2009	210	Sweden	270	Rapeseed	1683.62	0	1.9631e+06	20.223
2009	21	Brazil	270	Rapeseed	21.2169	0	60001.5	16.749
2009	238	Ethiopia	270	Rapeseed	0.0748924	NA	NA	0.815
2009	16	Bangladesh	270	Rapeseed	0.0451529	17.6999	174.742	2.294
2009	183	Romania	270	Rapeseed	4586.67	0	1.41912e+07	4.002
2009	106	Italy	270	Rapeseed	14.7811	0	49147.1	2.273
2009	150	Netherlands	270	Rapeseed	97.8858	0	85748	3.277
2009	231	United States	280	Safflower seed	0.0370405	30.9288	49.8565	22
2009	9	Argentina	280	Safflower seed	0.994763	248.691	6919.57	13.678
2009	201	Somalia	289	Sesame seed	1.14944	663.226	8287.45	1.984
2009	157	Nicaragua	289	Sesame seed	2.61594	0	21236.2	4.51
2009	212	Syria	289	Sesame seed	0.189195	1728.1	659.721	0.976
2009	95	Honduras	289	Sesame seed	0.0396145	0.316916	191.972	4.51
2009	59	Egypt	289	Sesame seed	1.31916	2581.59	1648.95	1.681
2009	44	Colombia	289	Sesame seed	0.0340146	1.05445	189.598	9.648
2009	84	Greece	289	Sesame seed	0.368437	928.092	1197.79	4.259
2009	206	NA	289	Sesame seed	51.5944	82912.2	385823	NA
2009	38	Sri Lanka	289	Sesame seed	0.0922141	174.469	550.703	2.1
2009	217	Togo	289	Sesame seed	0.547018	0.547018	8334.92	1.598
2009	144	Mozambique	289	Sesame seed	0.797051	26.3027	6307.86	3.451
2009	120	Lao	289	Sesame seed	0.468891	NA	NA	8.865
2009	237	Vietnam	289	Sesame seed	0.0542792	0.108558	430.326	3.809
2009	106	Italy	289	Sesame seed	0.411949	17.7138	159.012	2.273
2009	170	Peru	289	Sesame seed	0.0365125	15.4083	104.718	7.61
2009	238	Ethiopia	289	Sesame seed	113.955	NA	NA	0.815
2009	158	Niger	289	Sesame seed	0.147369	172.275	1417.99	1.614
2009	165	Pakistan	289	Sesame seed	5.22127	15951	17230.2	0.594
2009	28	Myanmar	289	Sesame seed	1.53204	55.1533	20932.2	9.429
2009	114	Kenya	289	Sesame seed	0.319393	65.1561	2306.65	1.018
2009	89	Guatemala	289	Sesame seed	12.3168	24.6336	82005.1	4.459
2009	41	China	289	Sesame seed	4.58073	238.198	19541.4	1.508
2009	60	El Salvador	289	Sesame seed	0.201463	224.833	865.89	4.51
2009	100	India	289	Sesame seed	274.556	55185.8	3.86273e+06	0.881
2009	90	Guinea	289	Sesame seed	0.452734	0	10045.3	2.492
2009	133	Mali	289	Sesame seed	0.919261	68.9445	10554	3.605
2009	138	Mexico	289	Sesame seed	7.28925	3557.16	54589.2	4.236
2009	159	Nigeria	289	Sesame seed	20.2873	81.1493	167066	2.328
2009	194	Saudi Arabia	289	Sesame seed	0.063893	239.471	111.813	0.479
2009	215	Tanzania	289	Sesame seed	2.78645	NA	NA	2.006
2009	169	Paraguay	289	Sesame seed	22.2232	22.2232	145673	15.566
2009	233	Burkina Faso	289	Sesame seed	5.68226	45.4581	52754.1	0.973
2009	216	Thailand	289	Sesame seed	10.4096	759.898	70118.9	3.613
2009	16	Bangladesh	289	Sesame seed	0.123459	0	579.148	2.294
2009	226	Uganda	289	Sesame seed	2.42223	0	14836.2	1.578
2009	236	Venezuela	289	Sesame seed	10.4353	NA	NA	17.1
2009	2	Afghanistan	289	Sesame seed	0.0362301	200.28	89.8869	0.853
2009	115	Cambodia	289	Sesame seed	0.358497	0	2867.98	9.505
2009	195	Senegal	289	Sesame seed	0.370844	0	3180.35	1.544
2009	121	Lebanon	289	Sesame seed	0.0639966	3.7758	70.3323	0.544
2009	214	Taiwan	289	Sesame seed	0.0149305	NA	NA	2
2009	117	South Korea	289	Sesame seed	0.0416481	NA	NA	1.14
2009	223	Turkey	289	Sesame seed	0.534157	992.464	2925.05	1.801
2009	231	United States	292	Mustard seed	27.4944	0	59277.8	22
2009	41	China	292	Mustard seed	1.38695	51.3171	4173.33	1.508
2009	68	France	292	Mustard seed	58.5368	0	61288	5.064
2009	238	Ethiopia	292	Mustard seed	0.100969	NA	NA	0.815
2009	79	Germany	292	Mustard seed	92.2105	0	102169	3.061
2009	97	Hungary	292	Mustard seed	56.2428	0	70472.2	4.007
2009	185	Russia	292	Mustard seed	6.81578	0	24543.6	12.681
2009	149	Nepal	292	Mustard seed	11.5511	0	31060.9	0.716
2009	126	Lithuania	292	Mustard seed	2.25544	0	5099.55	8.15
2009	54	Denmark	292	Mustard seed	0.462642	0	670.369	7.856
2009	33	Canada	292	Mustard seed	739.598	0	1.55464e+06	110.909
2009	272	Serbia	292	Mustard seed	17.1696	NA	NA	4.37
2009	167	Czech Republic	292	Mustard seed	476.012	0	741627	3.932
2009	199	Slovak Republic	292	Mustard seed	14.6548	0	33251.8	3.987
2009	27	Bulgaria	292	Mustard seed	0.0202894	0	53.706	4.006
2009	230	Ukraine	292	Mustard seed	723.719	0	1.95766e+06	4.3
2009	183	Romania	292	Mustard seed	21.7591	0	59706.9	4.002
2009	167	Czech Republic	296	Poppy seed	39.5588	0	44859.7	3.932
2009	272	Serbia	296	Poppy seed	0.0301204	NA	NA	4.37
2009	223	Turkey	296	Poppy seed	7.21078	0	19923.4	1.801
2009	199	Slovak Republic	296	Poppy seed	0.429036	0	805.73	3.987
2009	150	Netherlands	296	Poppy seed	1.72708	0	599.297	3.277
2009	79	Germany	296	Poppy seed	8.15963	0	6641.94	3.061
2009	97	Hungary	296	Poppy seed	0.436297	0	558.46	4.007
2009	183	Romania	296	Poppy seed	0.014067	0	18.0338	4.002
2009	11	Austria	296	Poppy seed	0.890627	0	621.658	2.873
2009	27	Bulgaria	296	Poppy seed	0.686786	0	0	4.006
2009	68	France	296	Poppy seed	4.3088	0	8328.92	5.064
2009	203	Spain	296	Poppy seed	2.75586	0	763.373	2.701
2009	20	Botswana	328	Seed cotton	0.872926	0	1628.88	7.297
2009	48	Costa Rica	328	Seed cotton	0.0172824	0	111.575	4.51
2009	107	Cote d'Ivoire	328	Seed cotton	2.76596	NA	NA	2.937
2009	41	China	328	Seed cotton	884.827	218552	1.27415e+06	1.508
2009	53	Benin	328	Seed cotton	13.1941	0	62711.6	2.331
2009	181	Zimbabwe	328	Seed cotton	7.74635	178.166	19791.9	1.66
2009	105	Israel	328	Seed cotton	3.35107	3538.73	971.811	0.486
2009	202	South Africa	328	Seed cotton	0.4187	1586.87	580.318	2.449
2009	223	Turkey	328	Seed cotton	23.4838	54717.3	11178.3	1.801
2009	233	Burkina Faso	328	Seed cotton	31.0769	0	153986	0.973
2009	169	Paraguay	328	Seed cotton	1.20072	0	9660.96	15.566
2009	235	Uzbekistan	328	Seed cotton	12.9843	43380.7	4557.51	1.147
2009	16	Bangladesh	328	Seed cotton	0.0827166	0	76.5956	2.294
2009	44	Colombia	328	Seed cotton	0.0117806	0.848202	26.8951	9.648
2009	52	Azerbaijan	328	Seed cotton	0.167671	686.278	262.07	1.916
2009	10	Australia	328	Seed cotton	16.6559	30430.3	13941	53.268
2009	213	Turkmenistan	328	Seed cotton	1.86314	8890.89	1861.27	2.688
2009	206	NA	328	Seed cotton	1.11226	5076.37	2339.09	NA
2009	215	Tanzania	328	Seed cotton	3.83784	NA	NA	2.006
2009	238	Ethiopia	328	Seed cotton	0.462198	NA	NA	0.815
2009	102	Iran	328	Seed cotton	0.150184	NA	NA	0.976
2009	59	Egypt	328	Seed cotton	1.30061	4948.81	200.294	1.681
2009	130	Malawi	328	Seed cotton	3.20552	0	19899.9	1.342
2009	208	Tajikistan	328	Seed cotton	2.51952	9712.73	1378.18	1.08
2009	203	Spain	328	Seed cotton	8.57241	18482.1	3420.39	2.701
2009	133	Mali	328	Seed cotton	2.83365	0	13431.5	3.605
2009	39	Chad	328	Seed cotton	2.71253	0	22375.7	4.791
2009	216	Thailand	328	Seed cotton	0.0624434	0	239.97	3.613
2009	113	Kyrgyz Republic	328	Seed cotton	0.154447	186.418	122.477	1.352
2009	222	Tunisia	328	Seed cotton	0.0354122	0	89.0616	0.869
2009	144	Mozambique	328	Seed cotton	1.36333	0	13507.8	3.451
2009	108	Kazakhstan	328	Seed cotton	11.3001	20498.4	12125	11.614
2009	32	Cameroon	328	Seed cotton	2.60153	0	10879.6	4.848
2009	2	Afghanistan	328	Seed cotton	0.0854912	585.529	37.7016	0.853
2009	170	Peru	328	Seed cotton	0.0242841	44.8042	38.3689	7.61
2009	27	Bulgaria	328	Seed cotton	0.0168151	13.368	70.7244	4.006
2009	84	Greece	328	Seed cotton	45.4153	53862.5	24251.8	4.259
2009	212	Syria	328	Seed cotton	2.96352	6116.71	198.556	0.976
2009	209	Swaziland	328	Seed cotton	0.088593	0	537.848	1.163
2009	37	Central African Republic	328	Seed cotton	0.082573	0	586.434	5.028
2009	226	Uganda	328	Seed cotton	1.86791	0	25063.6	1.578
2009	231	United States	328	Seed cotton	675.967	610399	1.429e+06	22
2009	101	Indonesia	328	Seed cotton	0.037726	0	197.571	16.287
2009	21	Brazil	328	Seed cotton	516.18	9291.24	1.13973e+06	16.749
2009	95	Honduras	328	Seed cotton	0.122355	5.3836	379.422	4.51
2009	138	Mexico	328	Seed cotton	1.07264	2252.55	858.114	4.236
2009	29	Burundi	328	Seed cotton	0.0127788	0	83.9058	0.42
2009	159	Nigeria	328	Seed cotton	0.358503	6.09455	841.406	2.328
2009	251	Zambia	328	Seed cotton	6.59252	19.7776	13040	5.161
2009	195	Senegal	328	Seed cotton	0.37291	0	2398.56	1.544
2009	165	Pakistan	328	Seed cotton	47.5388	102494	46683.1	0.594
2009	9	Argentina	328	Seed cotton	2.30175	220.968	13221.3	13.678
2009	217	Togo	328	Seed cotton	0.811744	0	3878.51	1.598
2009	100	India	328	Seed cotton	36.3696	67865.6	236039	0.881
2009	81	Ghana	328	Seed cotton	0.152571	0	887.962	2.981
2009	230	Ukraine	333	Linseed	54.5886	6932.76	456416	4.3
2009	106	Italy	333	Linseed	0.238095	142.619	1216.66	2.273
2009	119	Latvia	333	Linseed	0.0330506	0.0330506	330.506	8.345
2009	57	Belarus	333	Linseed	1.30912	6.54561	20726	5.092
2009	150	Netherlands	333	Linseed	3.05708	61.1416	9030.62	3.277
2009	108	Kazakhstan	333	Linseed	14.202	50303.6	54961.9	11.614
2009	185	Russia	333	Linseed	201.572	22576.1	1.15017e+06	12.681
2009	211	Switzerland	333	Linseed	0.013354	0	0	1.642
2009	10	Australia	333	Linseed	0.0762955	32.5019	215.764	53.268
2009	255	Belgium	333	Linseed	18.3851	533.168	78155.1	2.037
2009	126	Lithuania	333	Linseed	2.59331	18.1532	23772.9	8.15
2009	199	Slovak Republic	333	Linseed	0.592729	253.095	2125.53	3.987
2009	100	India	333	Linseed	1.01632	147.367	13444.9	0.881
2009	173	Poland	333	Linseed	0.0978692	0.0978692	615.891	3.103
2009	11	Austria	333	Linseed	0.889434	40.0245	2751.91	2.873
2009	203	Spain	333	Linseed	0.112746	338.914	473.081	2.701
2009	167	Czech Republic	333	Linseed	0.973165	28.2218	4587.5	3.932
2009	41	China	333	Linseed	5.02236	336.498	25408.1	1.508
2009	210	Sweden	333	Linseed	525.962	2629.81	1.45481e+06	20.223
2009	59	Egypt	333	Linseed	0.0240419	30.9659	20.5558	1.681
2009	238	Ethiopia	333	Linseed	0.0166165	NA	NA	0.815
2009	231	United States	333	Linseed	10.4375	9988.68	25143.9	22
2009	27	Bulgaria	333	Linseed	0.216996	68.1366	1458.21	4.006
2009	68	France	333	Linseed	12.9781	4178.95	66746.4	5.064
2009	63	Estonia	333	Linseed	0.967929	0.967929	4887.07	8.345
2009	9	Argentina	333	Linseed	5.90789	3656.98	37739.6	13.678
2009	229	United Kingdom	333	Linseed	63.1957	1074.33	132016	5.868
2009	234	Uruguay	333	Linseed	0.268243	23.0689	1145.13	14.962
2009	33	Canada	333	Linseed	764.07	22922.1	2.07292e+06	110.909
2009	79	Germany	333	Linseed	6.78565	27.1426	21971.9	3.061
2009	183	Romania	333	Linseed	0.296763	30.8634	1299.82	4.002
2009	156	New Zealand	333	Linseed	0.0149188	3.04344	30.6135	58.852
2009	54	Denmark	333	Linseed	0.17149	0.514469	967.887	7.856
2009	97	Hungary	333	Linseed	0.117524	11.0472	366.674	4.007
2009	181	Zimbabwe	339	Oilseeds nes	0.0493035	29.8286	406.754	1.66
2009	170	Peru	339	Oilseeds nes	14.7843	0	0	7.61
2009	33	Canada	339	Oilseeds nes	3.13693	614.838	29973.4	110.909
2009	11	Austria	339	Oilseeds nes	6.27889	345.339	13261	2.873
2009	158	Niger	339	Oilseeds nes	1.15105	0	0	1.614
2009	53	Benin	339	Oilseeds nes	0.179482	0.717926	677.543	2.331
2009	97	Hungary	339	Oilseeds nes	12.9185	1485.63	27503.5	4.007
2009	211	Switzerland	339	Oilseeds nes	0.095472	0	0	1.642
2009	113	Kyrgyz Republic	339	Oilseeds nes	0.0250849	89.0766	96.9533	1.352
2009	174	Portugal	339	Oilseeds nes	22.0177	0	0	2.74
2009	149	Nepal	339	Oilseeds nes	4.02523	84.5298	30571.6	0.716
2009	167	Czech Republic	339	Oilseeds nes	4.63264	226.999	17576.2	3.932
2009	108	Kazakhstan	339	Oilseeds nes	9.47364	19932.5	10165.2	11.614
2009	21	Brazil	339	Oilseeds nes	40.3048	0	0	16.749
2009	98	Croatia	339	Oilseeds nes	0.720112	0	0	4.398
2009	131	Malaysia	339	Oilseeds nes	138.658	51719.4	1.10081e+06	25.815
2009	41	China	339	Oilseeds nes	202.387	0	0	1.508
2009	48	Costa Rica	339	Oilseeds nes	0.654454	0	0	4.51
2009	143	Morocco	339	Oilseeds nes	0.378243	1461.15	389.968	0.939
2009	159	Nigeria	339	Oilseeds nes	0.0459603	0	0	2.328
2009	165	Pakistan	339	Oilseeds nes	9.27692	0	0	0.594
2009	117	South Korea	339	Oilseeds nes	1.29541	NA	NA	1.14
2009	106	Italy	339	Oilseeds nes	61.1199	0	0	2.273
2009	171	Philippines	339	Oilseeds nes	0.0178867	1.84233	164.433	3.939
2009	68	France	339	Oilseeds nes	25.4595	0	0	5.064
2009	226	Uganda	339	Oilseeds nes	0.238591	0	0	1.578
2009	215	Tanzania	339	Oilseeds nes	17.9359	NA	NA	2.006
2009	173	Poland	339	Oilseeds nes	52.507	157.521	213231	3.103
2009	214	Taiwan	339	Oilseeds nes	0.567321	NA	NA	2
2009	81	Ghana	339	Oilseeds nes	0.735966	0	0	2.981
2009	185	Russia	339	Oilseeds nes	4.74028	649.418	20274.2	12.681
2009	206	NA	339	Oilseeds nes	4.41005	0	0	NA
2009	238	Ethiopia	339	Oilseeds nes	180.336	NA	NA	0.815
2009	100	India	339	Oilseeds nes	114.471	59295.8	1.60373e+06	0.881
2009	52	Azerbaijan	339	Oilseeds nes	1.81339	908.507	1320.15	1.916
2009	202	South Africa	339	Oilseeds nes	4.68396	9400.71	12777.8	2.449
2009	27	Bulgaria	339	Oilseeds nes	4.10578	541.963	7920.05	4.006
2009	119	Latvia	339	Oilseeds nes	7.24879	7.24879	15113.7	8.345
2009	230	Ukraine	339	Oilseeds nes	8.78115	974.707	35546.1	4.3
2009	114	Kenya	339	Oilseeds nes	3.03329	1280.05	19549.6	1.018
2009	126	Lithuania	339	Oilseeds nes	28.2193	0	0	8.15
2009	199	Slovak Republic	339	Oilseeds nes	1.37564	737.342	3448.72	3.987
2009	105	Israel	339	Oilseeds nes	1.66341	9369.98	1543.64	0.486
2009	107	Cote d'Ivoire	339	Oilseeds nes	14.4313	NA	NA	2.937
2009	102	Iran	339	Oilseeds nes	0.113107	NA	NA	0.976
2009	126	Lithuania	358	Cabbages and other brassicas	5.88764	11.7753	871.371	8.15
2009	114	Kenya	358	Cabbages and other brassicas	1.54913	40.2773	337.71	1.018
2009	183	Romania	358	Cabbages and other brassicas	0.109939	1.75903	17.2604	4.002
2009	105	Israel	358	Cabbages and other brassicas	0.0783036	9.23983	3.60197	0.486
2009	173	Poland	358	Cabbages and other brassicas	369.084	369.084	32479.4	3.103
2009	272	Serbia	358	Cabbages and other brassicas	0.164076	NA	NA	4.37
2009	89	Guatemala	358	Cabbages and other brassicas	0.152024	0.456073	53.5125	4.459
2009	106	Italy	358	Cabbages and other brassicas	199.023	13334.6	36620.3	2.273
2009	231	United States	358	Cabbages and other brassicas	0.499409	59.4297	61.4273	22
2009	165	Pakistan	358	Cabbages and other brassicas	0.0538566	10.1789	3.76996	0.594
2009	54	Denmark	358	Cabbages and other brassicas	1.27481	7.64888	124.932	7.856
2009	198	Slovenia	358	Cabbages and other brassicas	0.164003	0.328007	21.1565	4.224
2009	117	South Korea	358	Cabbages and other brassicas	0.0406228	NA	NA	1.14
2009	104	Ireland	358	Cabbages and other brassicas	0.0321963	0	2.18935	19.74
2009	63	Estonia	358	Cabbages and other brassicas	94.2811	94.2811	18384.8	8.345
2009	211	Switzerland	358	Cabbages and other brassicas	0.0279164	0.0279164	4.74579	1.642
2009	79	Germany	358	Cabbages and other brassicas	495.034	4950.34	33662.3	3.061
2009	199	Slovak Republic	358	Cabbages and other brassicas	9.54806	572.884	1785.49	3.987
2009	97	Hungary	358	Cabbages and other brassicas	1289.22	37387.3	167598	4.007
2009	27	Bulgaria	358	Cabbages and other brassicas	0.0340943	1.12511	5.48919	4.006
2009	68	France	358	Cabbages and other brassicas	9.32521	373.008	1361.48	5.064
2009	202	South Africa	358	Cabbages and other brassicas	0.477108	28.6265	41.9855	2.449
2009	150	Netherlands	358	Cabbages and other brassicas	950.997	2852.99	99854.7	3.277
2009	119	Latvia	358	Cabbages and other brassicas	4.25338	0	714.567	8.345
2009	229	United Kingdom	358	Cabbages and other brassicas	4.74021	33.1815	606.747	5.868
2009	143	Morocco	358	Cabbages and other brassicas	2.00112	276.154	140.078	0.939
2009	138	Mexico	358	Cabbages and other brassicas	0.0677561	3.99761	3.25229	4.236
2009	203	Spain	358	Cabbages and other brassicas	1401.26	123310	113502	2.701
2009	3	Albania	358	Cabbages and other brassicas	1.10518	119.359	138.148	4.4
2009	10	Australia	358	Cabbages and other brassicas	0.128343	18.2247	10.3958	53.268
2009	210	Sweden	358	Cabbages and other brassicas	99.4003	994.003	7057.42	20.223
2009	174	Portugal	358	Cabbages and other brassicas	62.3926	4866.62	8922.14	2.74
2009	167	Czech Republic	358	Cabbages and other brassicas	4.71974	47.1974	467.254	3.932
2009	59	Egypt	358	Cabbages and other brassicas	1.60308	335.044	52.9017	1.681
2009	223	Turkey	358	Cabbages and other brassicas	0.469823	42.2841	43.6936	1.801
2009	11	Austria	358	Cabbages and other brassicas	5.94765	154.639	452.022	2.873
2009	212	Syria	358	Cabbages and other brassicas	0.0828888	16.3291	5.1391	0.976
2009	41	China	358	Cabbages and other brassicas	0.128415	0.513661	30.4344	1.508
2009	162	Norway	358	Cabbages and other brassicas	0.370326	1.85163	38.8843	55.393
2009	154	NA	358	Cabbages and other brassicas	9.59804	NA	NA	NA
2009	255	Belgium	358	Cabbages and other brassicas	58.8309	176.493	7589.18	2.037
2009	106	Italy	366	Artichokes	1.56448	258.139	899.574	2.273
2009	170	Peru	366	Artichokes	0.0713339	20.4728	28.8902	7.61
2009	105	Israel	366	Artichokes	0.0550447	77.668	20.972	0.486
2009	59	Egypt	366	Artichokes	0.431597	365.131	26.759	1.681
2009	222	Tunisia	366	Artichokes	0.0144299	1.52957	8.85994	0.869
2009	203	Spain	366	Artichokes	10.6197	1635.44	3270.88	2.701
2009	68	France	366	Artichokes	11.1342	3206.64	10477.3	5.064
2009	143	Morocco	366	Artichokes	0.106419	23.093	27.1369	0.939
2009	9	Argentina	367	Asparagus	0.0243735	14.0391	30.1256	13.678
2009	216	Thailand	367	Asparagus	0.808834	242.65	1973.55	3.613
2009	106	Italy	367	Asparagus	1.67409	642.852	1399.54	2.273
2009	170	Peru	367	Asparagus	62.1315	29698.9	36160.5	7.61
2009	138	Mexico	367	Asparagus	2.22686	1585.52	2845.92	4.236
2009	11	Austria	367	Asparagus	0.831768	259.512	775.208	2.873
2009	231	United States	367	Asparagus	0.146194	195.462	139.323	22
2009	150	Netherlands	367	Asparagus	52.0981	1041.96	37198.1	3.277
2009	229	United Kingdom	367	Asparagus	0.0645531	6.77807	129.816	5.868
2009	203	Spain	367	Asparagus	38.0577	56401.4	38247.9	2.701
2009	143	Morocco	367	Asparagus	1.378	1406.94	658.686	0.939
2009	40	Chile	367	Asparagus	0.0101278	7.02869	11.7786	21.914
2009	154	NA	367	Asparagus	0.159548	NA	NA	NA
2009	58	Ecuador	367	Asparagus	0.0831249	53.4493	200.58	2.575
2009	167	Czech Republic	367	Asparagus	0.799908	51.994	521.54	3.932
2009	255	Belgium	367	Asparagus	11.4201	194.142	8405.19	2.037
2009	114	Kenya	367	Asparagus	0.0351816	2.42753	39.4738	1.018
2009	173	Poland	367	Asparagus	2.36829	28.4195	1160.46	3.103
2009	68	France	367	Asparagus	0.814315	311.068	1399.81	5.064
2009	97	Hungary	367	Asparagus	198.208	49155.6	203758	4.007
2009	199	Slovak Republic	367	Asparagus	0.470255	135.433	441.569	3.987
2009	79	Germany	367	Asparagus	8.6589	1489.33	10442.6	3.061
2009	84	Greece	367	Asparagus	7.72738	9705.58	6475.54	4.259
2009	68	France	372	Lettuce and chicory	279.392	4470.27	26542.2	5.064
2009	198	Slovenia	372	Lettuce and chicory	0.192088	0.192088	12.6778	4.224
2009	143	Morocco	372	Lettuce and chicory	7.0181	189.489	484.249	0.939
2009	202	South Africa	372	Lettuce and chicory	0.049796	6.42368	8.11674	2.449
2009	138	Mexico	372	Lettuce and chicory	0.0356704	1.74785	4.13777	4.236
2009	59	Egypt	372	Lettuce and chicory	22.9974	3817.57	367.959	1.681
2009	183	Romania	372	Lettuce and chicory	0.029397	0.49975	8.23117	4.002
2009	211	Switzerland	372	Lettuce and chicory	0.374774	1.12432	60.3387	1.642
2009	255	Belgium	372	Lettuce and chicory	211.544	846.175	14808.1	2.037
2009	119	Latvia	372	Lettuce and chicory	0.0273904	0.0273904	26.2674	8.345
2009	84	Greece	372	Lettuce and chicory	6.53047	666.108	359.176	4.259
2009	79	Germany	372	Lettuce and chicory	1001.79	1001.79	119213	3.061
2009	100	India	372	Lettuce and chicory	0.630453	11.9786	326.575	0.881
2009	50	Cyprus	372	Lettuce and chicory	0.0496844	5.36591	4.02444	NA
2009	173	Poland	372	Lettuce and chicory	1.82513	0	436.206	3.103
2009	89	Guatemala	372	Lettuce and chicory	0.0160498	0.0320996	2.69637	4.459
2009	3	Albania	372	Lettuce and chicory	0.0485184	0	0	4.4
2009	174	Portugal	372	Lettuce and chicory	35.7371	1858.33	2394.39	2.74
2009	40	Chile	372	Lettuce and chicory	25.4723	8609.65	1884.95	21.914
2009	231	United States	372	Lettuce and chicory	1.41387	59.3824	42.416	22
2009	41	China	372	Lettuce and chicory	0.107232	0.643394	18.3367	1.508
2009	229	United Kingdom	372	Lettuce and chicory	110.88	554.402	10533.6	5.868
2009	54	Denmark	372	Lettuce and chicory	34.4382	34.4382	2789.5	7.856
2009	167	Czech Republic	372	Lettuce and chicory	0.114767	0.573836	25.7078	3.932
2009	162	Norway	372	Lettuce and chicory	0.968296	2.90489	109.417	55.393
2009	106	Italy	372	Lettuce and chicory	512.739	19996.8	70758	2.273
2009	11	Austria	372	Lettuce and chicory	4.07767	16.3107	362.913	2.873
2009	223	Turkey	372	Lettuce and chicory	0.350061	22.4039	28.705	1.801
2009	222	Tunisia	372	Lettuce and chicory	15.0619	90.3714	873.59	0.869
2009	150	Netherlands	372	Lettuce and chicory	2445.28	12226.4	161389	3.277
2009	105	Israel	372	Lettuce and chicory	0.154921	20.6044	2.32381	0.486
2009	134	Malta	372	Lettuce and chicory	0.200548	13.0356	6.81865	NA
2009	104	Ireland	372	Lettuce and chicory	1.02813	0	85.3349	19.74
2009	97	Hungary	372	Lettuce and chicory	0.431245	3.8812	52.1806	4.007
2009	203	Spain	372	Lettuce and chicory	13085	955207	614997	2.701
2009	210	Sweden	372	Lettuce and chicory	2152.38	4304.76	210933	20.223
2009	223	Turkey	373	Spinach	0.27125	14.105	31.465	1.801
2009	41	China	373	Spinach	0.0104472	0.0626835	1.15964	1.508
2009	174	Portugal	373	Spinach	0.848787	57.7175	71.2981	2.74
2009	11	Austria	373	Spinach	0.116263	0.348788	8.02213	2.873
2009	106	Italy	373	Spinach	19.1189	535.328	1950.12	2.273
2009	50	Cyprus	373	Spinach	0.0247484	3.71226	2.59858	NA
2009	79	Germany	373	Spinach	1.61013	1.61013	133.641	3.061
2009	68	France	373	Spinach	0.924871	10.1736	68.4405	5.064
2009	203	Spain	373	Spinach	35.5981	4058.18	2527.46	2.701
2009	150	Netherlands	373	Spinach	5.39859	32.3915	302.321	3.277
2009	59	Egypt	373	Spinach	0.0289574	6.80499	0.66602	1.681
2009	255	Belgium	373	Spinach	4.02284	12.0685	241.37	2.037
2009	255	Belgium	388	Tomatoes	200.96	0	2210.56	2.037
2009	9	Argentina	388	Tomatoes	5.44679	179.744	408.509	13.678
2009	273	Montenegro	388	Tomatoes	0.0386922	NA	NA	4.4
2009	221	Oman	388	Tomatoes	1.17341	152.543	49.2832	0.707
2009	185	Russia	388	Tomatoes	0.263865	10.5546	76.5208	12.681
2009	143	Morocco	388	Tomatoes	334.827	17076.2	14732.4	0.939
2009	194	Saudi Arabia	388	Tomatoes	0.0890117	24.7453	5.60774	0.479
2009	103	Iraq	388	Tomatoes	0.0341934	8.99286	3.79546	0.675
2009	223	Turkey	388	Tomatoes	1195.46	66945.8	71727.6	1.801
2009	112	Jordan	388	Tomatoes	1.07966	92.8506	45.3457	0.108
2009	56	Dominican Republic	388	Tomatoes	0.469977	3.75982	54.5174	1.03
2009	126	Lithuania	388	Tomatoes	0.131488	0.920414	61.5362	8.15
2009	229	United Kingdom	388	Tomatoes	29.5964	29.5964	266.368	5.868
2009	10	Australia	388	Tomatoes	1.19919	83.9435	44.3701	53.268
2009	211	Switzerland	388	Tomatoes	4.87862	0	156.116	1.642
2009	174	Portugal	388	Tomatoes	8238.76	131820	337789	2.74
2009	119	Latvia	388	Tomatoes	1.08339	1.08339	384.602	8.345
2009	216	Thailand	388	Tomatoes	0.57545	29.348	90.3457	3.613
2009	222	Tunisia	388	Tomatoes	9.27673	445.283	556.604	0.869
2009	1	Armenia	388	Tomatoes	0.0183795	2.29744	1.41522	1.896
2009	54	Denmark	388	Tomatoes	9.98917	9.98917	99.8917	7.856
2009	48	Costa Rica	388	Tomatoes	0.0553217	2.26819	4.97895	4.51
2009	150	Netherlands	388	Tomatoes	8987.39	0	62911.7	3.277
2009	97	Hungary	388	Tomatoes	38.2478	1109.19	4092.52	4.007
2009	3	Albania	388	Tomatoes	1.647	177.876	159.759	4.4
2009	156	New Zealand	388	Tomatoes	0.22986	4.36733	8.96452	58.852
2009	44	Colombia	388	Tomatoes	0.0189044	0.189044	3.53512	9.648
2009	103	Iraq	388	Tomatoes	0.0341934	8.99286	3.79546	0.675
2009	108	Kazakhstan	388	Tomatoes	0.0311014	6.68681	4.19869	11.614
2009	107	Cote d'Ivoire	388	Tomatoes	0.248762	NA	NA	2.937
2009	131	Malaysia	388	Tomatoes	0.0870891	2.78685	19.8563	25.815
2009	272	Serbia	388	Tomatoes	0.216032	NA	NA	4.37
2009	299	NA	388	Tomatoes	2.63696	97.5675	84.3827	NA
2009	103	Iraq	388	Tomatoes	0.0341934	8.99286	3.79546	0.675
2009	212	Syria	388	Tomatoes	2.22676	113.565	111.338	0.976
2009	203	Spain	388	Tomatoes	12254.6	281855	428910	2.701
2009	59	Egypt	388	Tomatoes	60.3889	8937.55	1509.72	1.681
2009	4	Algeria	388	Tomatoes	0.0202307	1.33522	2.44791	0.85
2009	89	Guatemala	388	Tomatoes	0.480705	10.0948	65.8566	4.459
2009	84	Greece	388	Tomatoes	7284.34	167540	305942	4.259
2009	146	Moldova	388	Tomatoes	1.78724	403.917	537.96	4.089
2009	33	Canada	388	Tomatoes	9.84883	0	492.442	110.909
2009	41	China	388	Tomatoes	4896.33	14689	891133	1.508
2009	117	South Korea	388	Tomatoes	0.246127	NA	NA	1.14
2009	165	Pakistan	388	Tomatoes	0.156275	57.8217	18.5967	0.594
2009	230	Ukraine	388	Tomatoes	8.68987	269.386	2754.69	4.3
2009	231	United States	388	Tomatoes	1363.92	100930	42281.4	22
2009	198	Slovenia	388	Tomatoes	7.84813	78.4813	1161.52	4.224
2009	199	Slovak Republic	388	Tomatoes	3.08097	231.073	536.088	3.987
2009	110	Japan	388	Tomatoes	0.344694	0	25.1627	3.555
2009	80	Bosnia and Herzegovina	388	Tomatoes	0.0611409	1.52852	30.1424	4.4
2009	100	India	388	Tomatoes	0.60842	35.2884	76.661	0.881
2009	134	Malta	388	Tomatoes	0.0413042	1.11521	1.81738	NA
2009	173	Poland	388	Tomatoes	921.048	2763.14	156578	3.103
2009	102	Iran	388	Tomatoes	0.73411	NA	NA	0.976
2009	202	South Africa	388	Tomatoes	1.0623	52.0529	56.3021	2.449
2009	63	Estonia	388	Tomatoes	8.84585	8.84585	946.506	8.345
2009	195	Senegal	388	Tomatoes	33.06	5091.25	1024.86	1.544
2009	206	NA	388	Tomatoes	0.0168874	5.18444	1.57053	NA
2009	68	France	388	Tomatoes	421.684	4638.52	12228.8	5.064
2009	106	Italy	388	Tomatoes	28139.5	872325	1.82907e+06	2.273
2009	105	Israel	388	Tomatoes	1327.37	34511.7	33184.3	0.486
2009	138	Mexico	388	Tomatoes	104.02	8841.7	6345.22	4.236
2009	181	Zimbabwe	388	Tomatoes	0.0213161	3.11214	9.01669	1.66
2009	40	Chile	388	Tomatoes	8.09988	32.3995	275.396	21.914
2009	121	Lebanon	388	Tomatoes	0.493876	22.7183	21.2367	0.544
2009	154	NA	388	Tomatoes	13.8546	NA	NA	NA
2009	99	Iceland	388	Tomatoes	0.0105909	0	0.0953179	NA
2009	79	Germany	388	Tomatoes	200.766	1003.83	4416.85	3.061
2009	27	Bulgaria	388	Tomatoes	4.80758	206.726	942.287	4.006
2009	98	Croatia	388	Tomatoes	0.491415	2.45708	183.298	4.398
2009	210	Sweden	388	Tomatoes	21.7028	43.4057	195.326	20.223
2009	104	Ireland	388	Tomatoes	0.912712	0	10.9525	19.74
2009	95	Honduras	388	Tomatoes	0.0253815	1.11678	4.924	4.51
2009	256	Luxembourg	388	Tomatoes	0.0278237	0.22259	1.61378	1.954
2009	21	Brazil	388	Tomatoes	0.0257207	0.488694	1.74901	16.749
2009	103	Iraq	388	Tomatoes	0.0341934	8.99286	3.79546	0.675
2009	50	Cyprus	388	Tomatoes	1.10533	29.8439	23.2119	NA
2009	11	Austria	388	Tomatoes	8.37554	50.2532	192.637	2.873
2009	162	Norway	388	Tomatoes	0.0892753	0.178551	0.892753	55.393
2009	183	Romania	388	Tomatoes	0.89749	23.3348	210.013	4.002
2009	225	United Arab Emirates	388	Tomatoes	0.123504	4.69315	6.4222	0.37
2009	167	Czech Republic	388	Tomatoes	1.46676	41.0693	300.686	3.932
2009	222	Tunisia	393	Cauliflowers and broccoli	0.0418372	0.251023	3.34698	0.869
2009	229	United Kingdom	393	Cauliflowers and broccoli	4.50964	40.5868	1019.18	5.868
2009	173	Poland	393	Cauliflowers and broccoli	27.4746	0	4560.79	3.103
2009	106	Italy	393	Cauliflowers and broccoli	147.651	5315.44	20523.5	2.273
2009	58	Ecuador	393	Cauliflowers and broccoli	671.684	820126	1.43001e+06	2.575
2009	104	Ireland	393	Cauliflowers and broccoli	0.0386563	0.0386563	11.5969	19.74
2009	68	France	393	Cauliflowers and broccoli	191.634	5749.01	39093.3	5.064
2009	198	Slovenia	393	Cauliflowers and broccoli	0.0720134	0	5.25698	4.224
2009	210	Sweden	393	Cauliflowers and broccoli	57.7946	115.589	8380.22	20.223
2009	54	Denmark	393	Cauliflowers and broccoli	5.67895	5.67895	1448.13	7.856
2009	174	Portugal	393	Cauliflowers and broccoli	1.14938	64.3656	91.9508	2.74
2009	50	Cyprus	393	Cauliflowers and broccoli	0.0104045	0.634677	0.541036	NA
2009	255	Belgium	393	Cauliflowers and broccoli	45.2048	316.434	7910.84	2.037
2009	167	Czech Republic	393	Cauliflowers and broccoli	0.0918909	0.367563	19.1133	3.932
2009	143	Morocco	393	Cauliflowers and broccoli	0.0243552	0.657589	2.1189	0.939
2009	150	Netherlands	393	Cauliflowers and broccoli	318.399	3502.39	56993.4	3.277
2009	183	Romania	393	Cauliflowers and broccoli	0.0332482	0.432226	8.01281	4.002
2009	79	Germany	393	Cauliflowers and broccoli	155.464	155.464	18966.6	3.061
2009	212	Syria	393	Cauliflowers and broccoli	0.026763	5.94138	0.508497	0.976
2009	223	Turkey	393	Cauliflowers and broccoli	0.190074	11.7846	16.3464	1.801
2009	199	Slovak Republic	393	Cauliflowers and broccoli	0.0769274	5.76956	19.8473	3.987
2009	202	South Africa	393	Cauliflowers and broccoli	0.0174814	1.34607	2.56977	2.449
2009	11	Austria	393	Cauliflowers and broccoli	0.248941	1.2447	32.1134	2.873
2009	59	Egypt	393	Cauliflowers and broccoli	1.27905	231.509	25.5811	1.681
2009	203	Spain	393	Cauliflowers and broccoli	1023.45	106439	75735.5	2.701
2009	41	China	393	Cauliflowers and broccoli	0.0298975	0.179385	5.53103	1.508
2009	97	Hungary	393	Cauliflowers and broccoli	4.32443	51.8932	743.802	4.007
2009	84	Greece	393	Cauliflowers and broccoli	0.189577	20.2847	11.9433	4.259
2009	211	Switzerland	393	Cauliflowers and broccoli	0.0189017	0.0378033	4.64981	1.642
2009	11	Austria	394	Pumpkins, squash and gourds	4.63644	4.63644	292.096	2.873
2009	105	Israel	394	Pumpkins, squash and gourds	1.7173	132.232	53.2364	0.486
2009	212	Syria	394	Pumpkins, squash and gourds	0.0640574	18.6407	5.44488	0.976
2009	203	Spain	394	Pumpkins, squash and gourds	1997.5	65917.6	99875.1	2.701
2009	121	Lebanon	394	Pumpkins, squash and gourds	0.0161054	0.0805268	1.25622	0.544
2009	27	Bulgaria	394	Pumpkins, squash and gourds	0.014116	0.225857	4.16423	4.006
2009	112	Jordan	394	Pumpkins, squash and gourds	0.674652	18.2156	70.8384	0.108
2009	170	Peru	394	Pumpkins, squash and gourds	1.42385	29.9009	197.916	7.61
2009	255	Belgium	394	Pumpkins, squash and gourds	38.433	0	0	2.037
2009	79	Germany	394	Pumpkins, squash and gourds	83.1319	0	0	3.061
2009	173	Poland	394	Pumpkins, squash and gourds	0.740715	0	122.218	3.103
2009	150	Netherlands	394	Pumpkins, squash and gourds	434.298	434.298	17806.2	3.277
2009	202	South Africa	394	Pumpkins, squash and gourds	1.37293	127.682	216.923	2.449
2009	174	Portugal	394	Pumpkins, squash and gourds	5.02811	201.125	538.008	2.74
2009	137	Mauritius	394	Pumpkins, squash and gourds	0.0727378	0.290951	19.421	NA
2009	223	Turkey	394	Pumpkins, squash and gourds	2.13619	91.8561	305.475	1.801
2009	54	Denmark	394	Pumpkins, squash and gourds	0.436905	0	26.2143	7.856
2009	119	Latvia	394	Pumpkins, squash and gourds	0.165587	0	30.6336	8.345
2009	84	Greece	394	Pumpkins, squash and gourds	0.651326	44.2902	55.3627	4.259
2009	106	Italy	394	Pumpkins, squash and gourds	24.9806	424.671	2323.2	2.273
2009	143	Morocco	394	Pumpkins, squash and gourds	55.9421	391.595	4866.97	0.939
2009	41	China	394	Pumpkins, squash and gourds	0.212267	0.212267	42.2411	1.508
2009	97	Hungary	394	Pumpkins, squash and gourds	10.9129	43.6516	1385.94	4.007
2009	216	Thailand	394	Pumpkins, squash and gourds	0.0234756	0.140853	6.50273	3.613
2009	199	Slovak Republic	394	Pumpkins, squash and gourds	0.0364602	1.16673	8.75044	3.987
2009	156	New Zealand	394	Pumpkins, squash and gourds	0.0441758	0.618461	6.89142	58.852
2009	68	France	394	Pumpkins, squash and gourds	8.47751	42.3876	559.516	5.064
2009	59	Egypt	394	Pumpkins, squash and gourds	0.0300901	5.53659	1.8355	1.681
2009	100	India	394	Pumpkins, squash and gourds	0.0241309	0.120654	8.49407	0.881
2009	167	Czech Republic	397	Cucumbers and gherkins	2.39517	40.7179	617.954	3.932
2009	58	Ecuador	397	Cucumbers and gherkins	0.632129	53.0989	176.996	2.575
2009	210	Sweden	397	Cucumbers and gherkins	213.398	426.796	6188.54	20.223
2009	174	Portugal	397	Cucumbers and gherkins	4.76412	257.262	457.355	2.74
2009	143	Morocco	397	Cucumbers and gherkins	6.83226	423.6	266.458	0.939
2009	203	Spain	397	Cucumbers and gherkins	6191.9	198141	198141	2.701
2009	114	Kenya	397	Cucumbers and gherkins	0.0132665	0.530658	4.48406	1.018
2009	183	Romania	397	Cucumbers and gherkins	3.83042	57.4563	731.61	4.002
2009	3	Albania	397	Cucumbers and gherkins	0.0166596	1.29945	1.44938	4.4
2009	59	Egypt	397	Cucumbers and gherkins	1.86534	380.53	115.651	1.681
2009	84	Greece	397	Cucumbers and gherkins	90.1418	2163.4	2343.69	4.259
2009	11	Austria	397	Cucumbers and gherkins	21.4063	235.469	963.282	2.873
2009	106	Italy	397	Cucumbers and gherkins	11.5006	391.02	1230.56	2.273
2009	229	United Kingdom	397	Cucumbers and gherkins	1.09948	0	6.59691	5.868
2009	199	Slovak Republic	397	Cucumbers and gherkins	0.673605	45.8051	187.262	3.987
2009	198	Slovenia	397	Cucumbers and gherkins	0.173105	0.34621	29.7741	4.224
2009	80	Bosnia and Herzegovina	397	Cucumbers and gherkins	0.165333	2.976	76.2186	4.4
2009	112	Jordan	397	Cucumbers and gherkins	2.84014	113.605	45.4422	0.108
2009	154	NA	397	Cucumbers and gherkins	4.20311	NA	NA	NA
2009	255	Belgium	397	Cucumbers and gherkins	32.4079	32.4079	583.342	2.037
2009	105	Israel	397	Cucumbers and gherkins	0.340905	12.9544	6.8181	0.486
2009	223	Turkey	397	Cucumbers and gherkins	64.7286	3560.07	4919.37	1.801
2009	97	Hungary	397	Cucumbers and gherkins	9.30148	176.728	995.259	4.007
2009	27	Bulgaria	397	Cucumbers and gherkins	19.972	539.243	3475.12	4.006
2009	126	Lithuania	397	Cucumbers and gherkins	1.4129	2.82579	534.075	8.15
2009	54	Denmark	397	Cucumbers and gherkins	2.09674	0	25.1609	7.856
2009	211	Switzerland	397	Cucumbers and gherkins	0.165422	0	5.62434	1.642
2009	230	Ukraine	397	Cucumbers and gherkins	0.164969	3.46435	49.6556	4.3
2009	68	France	397	Cucumbers and gherkins	14.0034	70.0168	336.08	5.064
2009	121	Lebanon	397	Cucumbers and gherkins	0.0721177	5.26459	2.09141	0.544
2009	102	Iran	397	Cucumbers and gherkins	0.0210002	NA	NA	0.976
2009	150	Netherlands	397	Cucumbers and gherkins	3445.07	0	13780.3	3.277
2009	119	Latvia	397	Cucumbers and gherkins	0.95017	0.95017	370.566	8.345
2009	212	Syria	397	Cucumbers and gherkins	0.220954	54.7965	22.0954	0.976
2009	272	Serbia	397	Cucumbers and gherkins	0.341489	NA	NA	4.37
2009	134	Malta	397	Cucumbers and gherkins	0.39592	0	0	NA
2009	79	Germany	397	Cucumbers and gherkins	1407.67	7038.36	85868	3.061
2009	173	Poland	397	Cucumbers and gherkins	11.9843	11.9843	2468.78	3.103
2009	216	Thailand	397	Cucumbers and gherkins	0.0160397	0.0801987	7.12165	3.613
2009	63	Estonia	397	Cucumbers and gherkins	32.1935	0	3122.77	8.345
2009	84	Greece	399	Eggplants (aubergines)	0.523255	85.8139	36.1046	4.259
2009	27	Bulgaria	399	Eggplants (aubergines)	0.058139	1.97673	8.54643	4.006
2009	11	Austria	399	Eggplants (aubergines)	0.155565	0.155565	17.1122	2.873
2009	223	Turkey	399	Eggplants (aubergines)	2.81645	214.05	230.949	1.801
2009	143	Morocco	399	Eggplants (aubergines)	0.0407835	0.774887	5.09794	0.939
2009	68	France	399	Eggplants (aubergines)	0.760351	19.0088	60.8281	5.064
2009	222	Tunisia	399	Eggplants (aubergines)	0.0180049	0.0900245	2.39465	0.869
2009	255	Belgium	399	Eggplants (aubergines)	8.49503	8.49503	543.682	2.037
2009	165	Pakistan	399	Eggplants (aubergines)	0.0123507	2.02552	0.938653	0.594
2009	100	India	399	Eggplants (aubergines)	0.177405	3.5481	51.8022	0.881
2009	56	Dominican Republic	399	Eggplants (aubergines)	0.691693	22.1342	477.96	1.03
2009	32	Cameroon	399	Eggplants (aubergines)	0.0638251	0.319125	71.4203	4.848
2009	203	Spain	399	Eggplants (aubergines)	311.377	33940.1	15568.9	2.701
2009	97	Hungary	399	Eggplants (aubergines)	0.0142539	0.128285	2.59422	4.007
2009	150	Netherlands	399	Eggplants (aubergines)	383.133	0	2681.93	3.277
2009	112	Jordan	399	Eggplants (aubergines)	0.0606613	5.52018	4.30695	0.108
2009	106	Italy	399	Eggplants (aubergines)	4.05613	186.582	425.893	2.273
2009	174	Portugal	399	Eggplants (aubergines)	0.0468994	5.90932	4.83064	2.74
2009	105	Israel	399	Eggplants (aubergines)	0.0861766	5.5153	1.29265	0.486
2009	216	Thailand	399	Eggplants (aubergines)	3.53442	130.773	2778.05	3.613
2009	225	United Arab Emirates	399	Eggplants (aubergines)	0.0408944	4.21212	1.75846	0.37
2009	81	Ghana	399	Eggplants (aubergines)	0.284152	1.70491	259.715	2.981
2009	59	Egypt	399	Eggplants (aubergines)	0.56487	163.248	21.4651	1.681
2009	299	NA	401	Chillies and peppers, green	0.218464	4.58775	13.1079	NA
2009	105	Israel	401	Chillies and peppers, green	1147.6	11476	58527.4	0.486
2009	68	France	401	Chillies and peppers, green	4.41758	123.692	379.912	5.064
2009	50	Cyprus	401	Chillies and peppers, green	0.0870968	0.870968	6.27097	NA
2009	56	Dominican Republic	401	Chillies and peppers, green	1.64557	21.3924	936.329	1.03
2009	49	Cuba	401	Chillies and peppers, green	0.119704	7.54136	41.5373	2.817
2009	223	Turkey	401	Chillies and peppers, green	36.6477	3371.59	3701.42	1.801
2009	183	Romania	401	Chillies and peppers, green	0.0110696	0.343156	3.06627	4.002
2009	212	Syria	401	Chillies and peppers, green	0.0881629	2.29224	10.5795	0.976
2009	131	Malaysia	401	Chillies and peppers, green	0.0104369	0	0	25.815
2009	222	Tunisia	401	Chillies and peppers, green	0.0134127	0.0938887	2.10579	0.869
2009	81	Ghana	401	Chillies and peppers, green	0.719117	43.147	366.03	2.981
2009	216	Thailand	401	Chillies and peppers, green	4.01326	300.995	642.122	3.613
2009	97	Hungary	401	Chillies and peppers, green	68.9206	3032.51	11096.2	4.007
2009	114	Kenya	401	Chillies and peppers, green	3.82142	332.463	2399.85	1.018
2009	89	Guatemala	401	Chillies and peppers, green	0.15795	12.7939	21.4812	4.459
2009	48	Costa Rica	401	Chillies and peppers, green	0.388837	0	0	4.51
2009	181	Zimbabwe	401	Chillies and peppers, green	4.42837	0	0	1.66
2009	109	Jamaica	401	Chillies and peppers, green	0.0163753	0.0982518	6.18987	1.94
2009	84	Greece	401	Chillies and peppers, green	26.1315	26.1315	1254.31	4.259
2009	95	Honduras	401	Chillies and peppers, green	0.780936	28.8946	413.115	4.51
2009	154	NA	401	Chillies and peppers, green	5.62153	NA	NA	NA
2009	59	Egypt	401	Chillies and peppers, green	31.9079	5200.99	2616.45	1.681
2009	104	Ireland	401	Chillies and peppers, green	0.0170143	0	0	19.74
2009	150	Netherlands	401	Chillies and peppers, green	6326.67	0	69593.4	3.277
2009	167	Czech Republic	401	Chillies and peppers, green	0.5287	12.1601	98.867	3.932
2009	166	Panama	401	Chillies and peppers, green	0.103295	1.54942	26.7534	4.505
2009	230	Ukraine	401	Chillies and peppers, green	4.32595	160.06	1596.28	4.3
2009	231	United States	401	Chillies and peppers, green	0.792218	76.8451	75.2607	22
2009	143	Morocco	401	Chillies and peppers, green	166.892	2503.38	13017.6	0.939
2009	112	Jordan	401	Chillies and peppers, green	2.29893	80.4624	188.512	0.108
2009	106	Italy	401	Chillies and peppers, green	85.6763	4455.17	9767.1	2.273
2009	27	Bulgaria	401	Chillies and peppers, green	2.60619	140.734	625.486	4.006
2009	11	Austria	401	Chillies and peppers, green	15.2369	487.58	1097.05	2.873
2009	272	Serbia	401	Chillies and peppers, green	3.06485	NA	NA	4.37
2009	80	Bosnia and Herzegovina	401	Chillies and peppers, green	0.16462	3.62164	66.0126	4.4
2009	100	India	401	Chillies and peppers, green	0.62707	42.6407	113.5	0.881
2009	138	Mexico	401	Chillies and peppers, green	0.950378	77.931	122.599	4.236
2009	174	Portugal	401	Chillies and peppers, green	0.687722	0.687722	241.39	2.74
2009	41	China	401	Chillies and peppers, green	3.40285	13.6114	731.613	1.508
2009	3	Albania	401	Chillies and peppers, green	0.018619	3.05352	2.69976	4.4
2009	229	United Kingdom	401	Chillies and peppers, green	4.91847	4.91847	63.9401	5.868
2009	98	Croatia	401	Chillies and peppers, green	0.495498	3.46849	215.542	4.398
2009	199	Slovak Republic	401	Chillies and peppers, green	1.80187	172.979	421.636	3.987
2009	184	Rwanda	401	Chillies and peppers, green	5.57397	0	0	0.362
2009	273	Montenegro	401	Chillies and peppers, green	0.063184	NA	NA	4.4
2009	198	Slovenia	401	Chillies and peppers, green	9.52808	85.7527	1286.29	4.224
2009	202	South Africa	401	Chillies and peppers, green	1.89395	0	0	2.449
2009	203	Spain	401	Chillies and peppers, green	4060.49	12181.5	158359	2.701
2009	255	Belgium	401	Chillies and peppers, green	100.552	301.656	7843.07	2.037
2009	170	Peru	401	Chillies and peppers, green	0.433372	109.21	178.549	7.61
2009	79	Germany	401	Chillies and peppers, green	8.89948	0	0	3.061
2009	58	Ecuador	401	Chillies and peppers, green	0.0137847	1.58524	7.23697	2.575
2009	33	Canada	401	Chillies and peppers, green	0.0365236	0	5.80725	110.909
2009	223	Turkey	402	Onions, shallots, green	0.243244	34.7839	45.4867	1.801
2009	162	Norway	402	Onions, shallots, green	0.021646	0.0649381	2.03473	55.393
2009	68	France	402	Onions, shallots, green	14.8809	178.57	1101.18	5.064
2009	216	Thailand	402	Onions, shallots, green	0.0964071	0	0	3.613
2009	229	United Kingdom	402	Onions, shallots, green	0.155303	2.95076	48.2993	5.868
2009	156	New Zealand	402	Onions, shallots, green	64.2549	1028.08	4048.06	58.852
2009	41	China	402	Onions, shallots, green	0.0606182	0.424328	10.5476	1.508
2009	79	Germany	402	Onions, shallots, green	4.80651	0	0	3.061
2009	4	Algeria	402	Onions, shallots, green	0.0285225	0	0	0.85
2009	150	Netherlands	402	Onions, shallots, green	75.1751	601.401	4811.21	3.277
2009	143	Morocco	402	Onions, shallots, green	1.16812	70.0875	101.627	0.939
2009	203	Spain	402	Onions, shallots, green	0.978974	112.582	75.381	2.701
2009	222	Tunisia	402	Onions, shallots, green	0.031964	0.479461	1.88588	0.869
2009	68	France	403	Onions, dry	154.35	5710.94	14045.8	5.064
2009	104	Ireland	403	Onions, dry	0.019687	0.019687	1.59465	19.74
2009	79	Germany	403	Onions, dry	960.009	25920.2	85440.8	3.061
2009	230	Ukraine	403	Onions, dry	0.284347	12.2269	87.8633	4.3
2009	106	Italy	403	Onions, dry	31.8301	2164.45	4201.57	2.273
2009	173	Poland	403	Onions, dry	122.981	614.906	18447.2	3.103
2009	229	United Kingdom	403	Onions, dry	6.69782	60.2804	488.941	5.868
2009	114	Kenya	403	Onions, dry	0.050107	2.75589	18.9405	1.018
2009	101	Indonesia	403	Onions, dry	0.0243949	0.414713	23.5898	16.287
2009	183	Romania	403	Onions, dry	0.0275273	1.37637	8.75368	4.002
2009	97	Hungary	403	Onions, dry	0.659275	33.623	83.0686	4.007
2009	129	Madagascar	403	Onions, dry	1.62446	63.3539	1397.04	5.758
2009	59	Egypt	403	Onions, dry	45.4487	10498.6	1727.05	1.681
2009	154	NA	403	Onions, dry	0.372738	NA	NA	NA
2009	9	Argentina	403	Onions, dry	27.9716	3048.91	4223.71	13.678
2009	203	Spain	403	Onions, dry	294.571	9720.84	17968.8	2.701
2009	167	Czech Republic	403	Onions, dry	0.050503	2.07062	11.4137	3.932
2009	223	Turkey	403	Onions, dry	0.828579	72.9149	106.887	1.801
2009	174	Portugal	403	Onions, dry	0.805839	13.6993	112.818	2.74
2009	54	Denmark	403	Onions, dry	44.6434	714.295	4241.12	7.856
2009	89	Guatemala	403	Onions, dry	0.512741	26.1498	108.188	4.459
2009	28	Myanmar	403	Onions, dry	0.014683	1.39488	3.59733	9.429
2009	170	Peru	403	Onions, dry	7.8587	1013.77	1453.86	7.61
2009	143	Morocco	403	Onions, dry	2.96678	326.346	433.15	0.939
2009	41	China	403	Onions, dry	0.37637	3.01096	82.8014	1.508
2009	202	South Africa	403	Onions, dry	21.6817	5008.48	4986.79	2.449
2009	33	Canada	403	Onions, dry	0.99981	0	85.9836	110.909
2009	21	Brazil	403	Onions, dry	0.0180551	0.722204	7.27621	16.749
2009	216	Thailand	403	Onions, dry	0.0403007	6.64962	9.10797	3.613
2009	150	Netherlands	403	Onions, dry	5158.9	25794.5	350805	3.277
2009	210	Sweden	403	Onions, dry	54.1604	1570.65	4224.51	20.223
2009	272	Serbia	403	Onions, dry	0.0560184	NA	NA	4.37
2009	231	United States	403	Onions, dry	140.111	10368.2	7425.9	22
2009	84	Greece	403	Onions, dry	0.0784093	1.88182	7.6057	4.259
2009	105	Israel	403	Onions, dry	0.0108317	0.74739	1.25648	0.486
2009	195	Senegal	403	Onions, dry	0.142391	21.3586	5.98041	1.544
2009	222	Tunisia	403	Onions, dry	0.0271829	2.09308	5.13757	0.869
2009	198	Slovenia	403	Onions, dry	0.0529533	1.6945	10.4847	4.224
2009	255	Belgium	403	Onions, dry	30.0612	240.489	3336.79	2.037
2009	10	Australia	403	Onions, dry	54.6549	8307.55	3880.5	53.268
2009	138	Mexico	403	Onions, dry	12.1119	1526.1	872.058	4.236
2009	11	Austria	403	Onions, dry	2.6443	126.926	208.9	2.873
2009	44	Colombia	403	Onions, dry	0.0188697	0.58496	3.41541	9.648
2009	199	Slovak Republic	403	Onions, dry	0.0236256	4.27624	7.22944	3.987
2009	40	Chile	403	Onions, dry	16.2431	357.348	1120.77	21.914
2009	134	Malta	403	Onions, dry	1.61736	95.424	294.359	NA
2009	100	India	403	Onions, dry	9.65372	1351.52	1496.33	0.881
2009	272	Serbia	406	Garlic	0.0164073	NA	NA	4.37
2009	126	Lithuania	406	Garlic	2.36623	30.761	965.421	8.15
2009	138	Mexico	406	Garlic	7.30257	3468.72	1248.74	4.236
2009	183	Romania	406	Garlic	7.19401	654.655	4071.81	4.002
2009	89	Guatemala	406	Garlic	0.0171194	2.70486	11.8124	4.459
2009	181	Zimbabwe	406	Garlic	0.103683	0	0	1.66
2009	63	Estonia	406	Garlic	5.55048	138.762	5900.16	8.345
2009	21	Brazil	406	Garlic	0.0618997	7.36606	60.3522	16.749
2009	102	Iran	406	Garlic	0.0269201	NA	NA	0.976
2009	100	India	406	Garlic	0.0173401	6.41582	6.38114	0.881
2009	11	Austria	406	Garlic	0.0234554	0	4.33925	2.873
2009	143	Morocco	406	Garlic	0.0606114	24.9719	29.2753	0.939
2009	97	Hungary	406	Garlic	0.847455	133.898	320.338	4.007
2009	40	Chile	406	Garlic	2.49989	2387.4	657.472	21.914
2009	84	Greece	406	Garlic	4.60473	400.611	1450.49	4.259
2009	119	Latvia	406	Garlic	0.152821	1.37539	154.655	8.345
2009	9	Argentina	406	Garlic	74.2116	23228.2	26716.2	13.678
2009	41	China	406	Garlic	569.805	6267.86	174360	1.508
2009	80	Bosnia and Herzegovina	406	Garlic	0.392986	0.785971	222.037	4.4
2009	68	France	406	Garlic	9.16217	82.4595	2473.78	5.064
2009	59	Egypt	406	Garlic	13.2045	3789.7	435.75	1.681
2009	165	Pakistan	406	Garlic	0.372976	207.375	38.0436	0.594
2009	106	Italy	406	Garlic	7.79641	109.15	1988.09	2.273
2009	223	Turkey	406	Garlic	0.0596113	15.9758	22.4734	1.801
2009	27	Bulgaria	406	Garlic	0.380532	83.717	302.903	4.006
2009	203	Spain	406	Garlic	240.353	45186.4	76192	2.701
2009	170	Peru	406	Garlic	0.087242	40.4803	46.7617	7.61
2009	231	United States	406	Garlic	0.455975	84.8113	52.8931	22
2009	174	Portugal	406	Garlic	0.174913	12.7687	100.225	2.74
2009	223	Turkey	407	Leeks, other alliaceous vegetables	11.0811	NA	NA	1.801
2009	119	Latvia	407	Leeks, other alliaceous vegetables	0.0207175	NA	NA	8.345
2009	41	China	407	Leeks, other alliaceous vegetables	262.119	NA	NA	1.508
2009	150	Netherlands	407	Leeks, other alliaceous vegetables	1074.7	NA	NA	3.277
2009	202	South Africa	407	Leeks, other alliaceous vegetables	0.261021	NA	NA	2.449
2009	143	Morocco	407	Leeks, other alliaceous vegetables	4.98245	NA	NA	0.939
2009	173	Poland	407	Leeks, other alliaceous vegetables	1.42999	NA	NA	3.103
2009	198	Slovenia	407	Leeks, other alliaceous vegetables	0.0573807	NA	NA	4.224
2009	154	NA	407	Leeks, other alliaceous vegetables	0.118915	NA	NA	NA
2009	138	Mexico	407	Leeks, other alliaceous vegetables	0.0155789	NA	NA	4.236
2009	255	Belgium	407	Leeks, other alliaceous vegetables	314.893	NA	NA	2.037
2009	210	Sweden	407	Leeks, other alliaceous vegetables	31.5227	NA	NA	20.223
2009	79	Germany	407	Leeks, other alliaceous vegetables	8.20283	NA	NA	3.061
2009	229	United Kingdom	407	Leeks, other alliaceous vegetables	0.0883414	NA	NA	5.868
2009	114	Kenya	407	Leeks, other alliaceous vegetables	0.189799	NA	NA	1.018
2009	170	Peru	407	Leeks, other alliaceous vegetables	0.0122962	NA	NA	7.61
2009	101	Indonesia	407	Leeks, other alliaceous vegetables	0.152944	NA	NA	16.287
2009	11	Austria	407	Leeks, other alliaceous vegetables	1.29363	NA	NA	2.873
2009	68	France	407	Leeks, other alliaceous vegetables	84.7283	NA	NA	5.064
2009	203	Spain	407	Leeks, other alliaceous vegetables	11.9327	NA	NA	2.701
2009	238	Ethiopia	407	Leeks, other alliaceous vegetables	0.0773661	NA	NA	0.815
2009	106	Italy	407	Leeks, other alliaceous vegetables	3.45039	NA	NA	2.273
2009	54	Denmark	407	Leeks, other alliaceous vegetables	15.7649	NA	NA	7.856
2009	183	Romania	407	Leeks, other alliaceous vegetables	0.0788508	NA	NA	4.002
2009	126	Lithuania	407	Leeks, other alliaceous vegetables	0.0572812	NA	NA	8.15
2009	215	Tanzania	414	Beans, green	0.199284	NA	NA	2.006
2009	207	Suriname	414	Beans, green	0.0450341	0	6.12463	121.744
2009	225	United Arab Emirates	414	Beans, green	0.0407741	12.3953	4.93366	0.37
2009	138	Mexico	414	Beans, green	0.0135525	0.96223	3.08998	4.236
2009	231	United States	414	Beans, green	0.017731	2.37595	5.74483	22
2009	255	Belgium	414	Beans, green	6.09683	30.4842	859.653	2.037
2009	173	Poland	414	Beans, green	0.379774	0	41.3954	3.103
2009	68	France	414	Beans, green	4.43917	97.6617	776.855	5.064
2009	238	Ethiopia	414	Beans, green	0.195463	NA	NA	0.815
2009	216	Thailand	414	Beans, green	0.0521789	1.46101	35.6382	3.613
2009	229	United Kingdom	414	Beans, green	0.321831	1.93099	53.7458	5.868
2009	165	Pakistan	414	Beans, green	0.0109726	1.19602	0.548632	0.594
2009	202	South Africa	414	Beans, green	0.0452352	11.3088	15.0633	2.449
2009	129	Madagascar	414	Beans, green	0.0159843	0.0639374	14.6097	5.758
2009	143	Morocco	414	Beans, green	18.9244	397.412	1381.48	0.939
2009	11	Austria	414	Beans, green	0.177284	1.0637	32.6202	2.873
2009	195	Senegal	414	Beans, green	2.89165	127.232	514.713	1.544
2009	212	Syria	414	Beans, green	0.184033	71.5887	10.1218	0.976
2009	59	Egypt	414	Beans, green	3.68202	975.735	195.147	1.681
2009	181	Zimbabwe	414	Beans, green	0.102034	0	0	1.66
2009	84	Greece	414	Beans, green	0.11221	14.6995	13.353	4.259
2009	97	Hungary	414	Beans, green	0.0127848	0.166202	3.11948	4.007
2009	203	Spain	414	Beans, green	3.29613	290.059	336.205	2.701
2009	233	Burkina Faso	414	Beans, green	0.297955	0.297955	74.4888	0.973
2009	27	Bulgaria	414	Beans, green	0.0184256	0.7186	9.3418	4.006
2009	223	Turkey	414	Beans, green	0.265782	21.2626	47.8408	1.801
2009	89	Guatemala	414	Beans, green	0.0783669	0.156734	26.2529	4.459
2009	112	Jordan	414	Beans, green	0.445449	13.8089	51.672	0.108
2009	79	Germany	414	Beans, green	3.35704	3.35704	681.478	3.061
2009	150	Netherlands	414	Beans, green	45	360	7110	3.277
2009	206	NA	414	Beans, green	0.0311133	0	0	NA
2009	114	Kenya	414	Beans, green	6.5871	46.1097	2845.63	1.018
2009	106	Italy	414	Beans, green	2.42759	121.379	553.49	2.273
2009	183	Romania	414	Beans, green	0.0308981	0.556166	13.1935	4.002
2009	79	Germany	417	Peas, green	91.005	182.01	24207.3	3.061
2009	146	Moldova	417	Peas, green	0.0148034	9.81469	14.5518	4.089
2009	59	Egypt	417	Peas, green	0.878338	411.941	65.8754	1.681
2009	215	Tanzania	417	Peas, green	0.557857	NA	NA	2.006
2009	238	Ethiopia	417	Peas, green	0.0670194	NA	NA	0.815
2009	54	Denmark	417	Peas, green	3.57633	10.729	1587.89	7.856
2009	181	Zimbabwe	417	Peas, green	1.60267	0	0	1.66
2009	199	Slovak Republic	417	Peas, green	0.0683683	17.9809	64.6081	3.987
2009	231	United States	417	Peas, green	0.0554268	6.15238	13.8013	22
2009	170	Peru	417	Peas, green	0.800852	249.866	645.487	7.61
2009	33	Canada	417	Peas, green	0.0878186	1.14164	58.8384	110.909
2009	11	Austria	417	Peas, green	0.10357	1.76069	46.2958	2.873
2009	203	Spain	417	Peas, green	0.137614	42.2476	34.8164	2.701
2009	255	Belgium	417	Peas, green	5.73123	57.3123	1266.6	2.037
2009	229	United Kingdom	417	Peas, green	1.58881	14.2993	325.707	5.868
2009	89	Guatemala	417	Peas, green	3.16443	9.49329	1670.82	4.459
2009	41	China	417	Peas, green	0.154809	2.01252	59.4466	1.508
2009	63	Estonia	417	Peas, green	7.62898	15.258	11207	8.345
2009	68	France	417	Peas, green	7.43722	178.493	1219.7	5.064
2009	173	Poland	417	Peas, green	0.0771062	0.0771062	41.9458	3.103
2009	97	Hungary	417	Peas, green	4.69285	93.8571	1464.17	4.007
2009	174	Portugal	417	Peas, green	0.0152938	2.4776	4.05286	2.74
2009	230	Ukraine	417	Peas, green	0.0301786	1.08643	31.4763	4.3
2009	167	Czech Republic	417	Peas, green	0.272563	3.27076	179.619	3.932
2009	210	Sweden	417	Peas, green	49.8564	299.139	22136.3	20.223
2009	143	Morocco	417	Peas, green	0.324613	23.6968	111.018	0.939
2009	150	Netherlands	417	Peas, green	45.7414	548.897	7684.55	3.277
2009	223	Turkey	417	Peas, green	0.0115169	1.64691	3.33989	1.801
2009	106	Italy	417	Peas, green	30.9082	2967.19	11837.8	2.273
2009	129	Madagascar	417	Peas, green	0.0317852	0.826416	132.322	5.758
2009	126	Lithuania	417	Peas, green	0.0928517	0.0928517	14.5777	8.15
2009	119	Latvia	417	Peas, green	0.0299576	0.0299576	28.1003	8.345
2009	183	Romania	417	Peas, green	6.70581	214.586	4445.95	4.002
2009	202	South Africa	417	Peas, green	0.0596257	26.3546	29.634	2.449
2009	114	Kenya	417	Peas, green	6.6134	105.814	3531.56	1.018
2009	84	Greece	426	Carrots and turnips	0.914102	101.465	63.9872	4.259
2009	212	Syria	426	Carrots and turnips	0.0622936	16.0094	5.04578	0.976
2009	126	Lithuania	426	Carrots and turnips	0.128189	0	11.4088	8.15
2009	211	Switzerland	426	Carrots and turnips	2.01369	0	90.6162	1.642
2009	174	Portugal	426	Carrots and turnips	17.984	1276.86	1546.62	2.74
2009	230	Ukraine	426	Carrots and turnips	0.0514244	0.102849	6.89086	4.3
2009	59	Egypt	426	Carrots and turnips	0.10448	28.4185	4.49262	1.681
2009	68	France	426	Carrots and turnips	189.823	4365.94	13857.1	5.064
2009	173	Poland	426	Carrots and turnips	177.732	0	9775.25	3.103
2009	167	Czech Republic	426	Carrots and turnips	0.321816	6.43632	45.376	3.932
2009	106	Italy	426	Carrots and turnips	1349	43168	95779.1	2.273
2009	112	Jordan	426	Carrots and turnips	0.0455954	11.3077	2.64453	0.108
2009	41	China	426	Carrots and turnips	3.69459	11.0838	532.02	1.508
2009	105	Israel	426	Carrots and turnips	163.485	12097.9	4087.11	0.486
2009	150	Netherlands	426	Carrots and turnips	4939.07	14817.2	281527	3.277
2009	79	Germany	426	Carrots and turnips	280.669	4210.03	18524.1	3.061
2009	183	Romania	426	Carrots and turnips	0.0343721	0	3.57469	4.002
2009	97	Hungary	426	Carrots and turnips	4.35871	26.1523	309.468	4.007
2009	33	Canada	426	Carrots and turnips	0.468023	0	25.7413	110.909
2009	27	Bulgaria	426	Carrots and turnips	0.0735683	0.220705	10.5938	4.006
2009	223	Turkey	426	Carrots and turnips	1.71304	11.9913	239.826	1.801
2009	143	Morocco	426	Carrots and turnips	4.42494	893.837	349.57	0.939
2009	11	Austria	426	Carrots and turnips	2.65411	84.9316	175.172	2.873
2009	54	Denmark	426	Carrots and turnips	74.5154	596.123	4545.44	7.856
2009	198	Slovenia	426	Carrots and turnips	0.252412	0.252412	23.9792	4.224
2009	138	Mexico	426	Carrots and turnips	0.348577	17.0803	20.2175	4.236
2009	57	Belarus	426	Carrots and turnips	0.0157859	0	1.38916	5.092
2009	229	United Kingdom	426	Carrots and turnips	14.2826	0	385.63	5.868
2009	48	Costa Rica	426	Carrots and turnips	0.240766	0	0	4.51
2009	104	Ireland	426	Carrots and turnips	0.925305	0.925305	72.1738	19.74
2009	63	Estonia	426	Carrots and turnips	0.886249	0	59.3787	8.345
2009	231	United States	426	Carrots and turnips	9.38425	187.685	609.976	22
2009	10	Australia	426	Carrots and turnips	1.28165	202.5	110.222	53.268
2009	255	Belgium	426	Carrots and turnips	98.7166	296.15	5429.41	2.037
2009	199	Slovak Republic	426	Carrots and turnips	0.0896407	1.34461	10.8465	3.987
2009	203	Spain	426	Carrots and turnips	748.311	68096.3	41905.4	2.701
2009	210	Sweden	426	Carrots and turnips	64.0111	0	1344.23	20.223
2009	256	Luxembourg	426	Carrots and turnips	0.0760306	1.67267	11.1005	1.954
2009	202	South Africa	426	Carrots and turnips	0.606419	55.1842	77.6217	2.449
2009	104	Ireland	44	Barley	1111.92	0	319121	19.74
2009	234	Uruguay	44	Barley	11.5365	0	21204	14.962
2009	230	Ukraine	44	Barley	100.813	1915.45	141542	4.3
2009	143	Morocco	44	Barley	0.088351	0	326.192	0.939
2009	210	Sweden	44	Barley	8317.61	0	4.46655e+06	20.223
2009	211	Switzerland	44	Barley	14.2928	0	5388.4	1.642
2009	138	Mexico	44	Barley	41.2512	35641.1	42818.8	4.236
2009	198	Slovenia	44	Barley	7.68985	0	7428.4	4.224
2009	162	Norway	44	Barley	40.5169	0	13735.2	55.393
2009	117	South Korea	44	Barley	0.0166774	NA	NA	1.14
2009	27	Bulgaria	44	Barley	58.0252	0	45085.6	4.006
2009	216	Thailand	44	Barley	0.679537	0	1391.69	3.613
2009	41	China	44	Barley	6.68592	187.206	3717.37	1.508
2009	63	Estonia	44	Barley	3387.83	0	5.19354e+06	8.345
2009	1	Armenia	44	Barley	0.0619742	21.2571	119.858	1.896
2009	231	United States	44	Barley	136.741	30219.7	126622	22
2009	105	Israel	44	Barley	0.0530299	0	160.84	0.486
2009	121	Lebanon	44	Barley	0.0397741	0	76.3662	0.544
2009	97	Hungary	44	Barley	143.062	143.062	84549.6	4.007
2009	102	Iran	44	Barley	0.0780219	NA	NA	0.976
2009	50	Cyprus	44	Barley	13.3438	427.002	21643.7	NA
2009	173	Poland	44	Barley	3254.29	0	3.38771e+06	3.103
2009	106	Italy	44	Barley	80.7815	0	58162.7	2.273
2009	272	Serbia	44	Barley	1.05585	NA	NA	4.37
2009	202	South Africa	44	Barley	0.421206	90.138	515.977	2.449
2009	9	Argentina	44	Barley	20.8749	208.749	30185.1	13.678
2009	223	Turkey	44	Barley	19.1309	325.225	27433.7	1.801
2009	174	Portugal	44	Barley	6.51958	0	16644.5	2.74
2009	100	India	44	Barley	0.374008	292.1	466.014	0.881
2009	113	Kyrgyz Republic	44	Barley	0.0169409	0.271055	12.5193	1.352
2009	33	Canada	44	Barley	125.569	1004.55	111630	110.909
2009	146	Moldova	44	Barley	30.4996	152.498	31811	4.089
2009	98	Croatia	44	Barley	3.02066	0	1890.93	4.398
2009	84	Greece	44	Barley	17.9762	0	18857	4.259
2009	203	Spain	44	Barley	967.392	81260.9	970294	2.701
2009	68	France	44	Barley	4797.44	19189.8	2.55224e+06	5.064
2009	119	Latvia	44	Barley	190.867	0	294889	8.345
2009	57	Belarus	44	Barley	122.824	368.473	170849	5.092
2009	150	Netherlands	44	Barley	417.364	0	151503	3.277
2009	156	New Zealand	44	Barley	69.3339	0	45344.3	58.852
2009	59	Egypt	44	Barley	0.0679924	115.247	42.0873	1.681
2009	154	NA	44	Barley	0.2044	NA	NA	NA
2009	21	Brazil	44	Barley	2.1826	0	4083.65	16.749
2009	79	Germany	44	Barley	12227.3	0	6.11367e+06	3.061
2009	126	Lithuania	44	Barley	1349.24	0	1.75941e+06	8.15
2009	199	Slovak Republic	44	Barley	171.141	1026.85	173709	3.987
2009	194	Saudi Arabia	44	Barley	0.118661	94.9286	23.0202	0.479
2009	54	Denmark	44	Barley	14661.5	0	6.46574e+06	7.856
2009	52	Azerbaijan	44	Barley	0.418854	187.228	459.483	1.916
2009	110	Japan	44	Barley	0.0935931	0	46.1414	3.555
2009	167	Czech Republic	44	Barley	1634.3	0	1.07374e+06	3.932
2009	10	Australia	44	Barley	71.5995	0	117352	53.268
2009	183	Romania	44	Barley	52.1357	0	40300.9	4.002
2009	4	Algeria	44	Barley	0.0158494	0	45.3136	0.85
2009	11	Austria	44	Barley	387.915	0	155166	2.873
2009	40	Chile	44	Barley	0.258263	54.4934	169.42	21.914
2009	80	Bosnia and Herzegovina	44	Barley	0.0594369	0	45.9447	4.4
2009	222	Tunisia	44	Barley	0.327864	24.5898	1167.52	0.869
2009	229	United Kingdom	44	Barley	1325.31	0	447954	5.868
2009	108	Kazakhstan	44	Barley	7.82831	1268.19	22193.2	11.614
2009	256	Luxembourg	44	Barley	39.5018	0	12838.1	1.954
2009	185	Russia	44	Barley	4936.55	256700	1.08851e+07	12.681
2009	255	Belgium	44	Barley	325.074	0	77692.7	2.037
2009	183	Romania	446	Maize, green	11.5461	0	0	4.002
2009	105	Israel	446	Maize, green	6.56137	0	0	0.486
2009	156	New Zealand	446	Maize, green	1.83094	320.415	503.509	58.852
2009	220	Trinidad and Tobago	446	Maize, green	0.0140374	0	0	15.602
2009	202	South Africa	446	Maize, green	8.54427	2734.17	3127.2	2.449
2009	41	China	446	Maize, green	273.42	3281.04	154482	1.508
2009	199	Slovak Republic	446	Maize, green	130.824	37154.1	75354.9	3.987
2009	60	El Salvador	446	Maize, green	0.0173502	1.89117	5.48266	4.51
2009	272	Serbia	446	Maize, green	34.5258	NA	NA	4.37
2009	216	Thailand	446	Maize, green	248.767	11692.1	168913	3.613
2009	27	Bulgaria	446	Maize, green	0.354647	0	0	4.006
2009	10	Australia	446	Maize, green	0.118918	50.1835	26.0431	53.268
2009	97	Hungary	446	Maize, green	1541.06	124826	372937	4.007
2009	98	Croatia	446	Maize, green	0.011642	0	0	4.398
2009	138	Mexico	446	Maize, green	13.0413	1173.71	5333.87	4.236
2009	181	Zimbabwe	446	Maize, green	0.0670908	12.6131	170.008	1.66
2009	101	Indonesia	446	Maize, green	0.21757	35.0288	339.41	16.287
2009	68	France	446	Maize, green	1360.82	85731.8	229979	5.064
2009	40	Chile	446	Maize, green	3.77345	1158.45	388.665	21.914
2009	11	Austria	446	Maize, green	4.8866	9.77319	1045.73	2.873
2009	33	Canada	446	Maize, green	65.3494	588.144	28230.9	110.909
2009	173	Poland	446	Maize, green	24.5176	0	9292.18	3.103
2009	231	United States	446	Maize, green	702.143	162897	138322	22
2009	170	Peru	446	Maize, green	19.554	3637.04	7606.49	7.61
2009	202	South Africa	449	Mushrooms and truffles	0.234844	NA	NA	2.449
2009	255	Belgium	449	Mushrooms and truffles	91.8517	NA	NA	2.037
2009	272	Serbia	449	Mushrooms and truffles	0.750434	NA	NA	4.37
2009	143	Morocco	449	Mushrooms and truffles	0.280357	NA	NA	0.939
2009	79	Germany	449	Mushrooms and truffles	64.6694	NA	NA	3.061
2009	199	Slovak Republic	449	Mushrooms and truffles	0.0658615	NA	NA	3.987
2009	231	United States	449	Mushrooms and truffles	1.10084	NA	NA	22
2009	101	Indonesia	449	Mushrooms and truffles	15.152	NA	NA	16.287
2009	183	Romania	449	Mushrooms and truffles	1.33648	NA	NA	4.002
2009	129	Madagascar	449	Mushrooms and truffles	0.0863298	NA	NA	5.758
2009	119	Latvia	449	Mushrooms and truffles	14.4791	NA	NA	8.345
2009	216	Thailand	449	Mushrooms and truffles	10.4208	NA	NA	3.613
2009	84	Greece	449	Mushrooms and truffles	0.494439	NA	NA	4.259
2009	150	Netherlands	449	Mushrooms and truffles	3063.4	NA	NA	3.277
2009	237	Vietnam	449	Mushrooms and truffles	0.30897	NA	NA	3.809
2009	198	Slovenia	449	Mushrooms and truffles	0.0352567	NA	NA	4.224
2009	27	Bulgaria	449	Mushrooms and truffles	1.90715	NA	NA	4.006
[truncated: 1,898 more rows]

## Sheet: 2008
Year	CountryCode	CountryName	ProductCode	ProductName	Imports	BlueWaterImports	GreenWaterImports	GBScarcity
2008	33	Canada	101	Canary seed	0.943806	1.88761	4720.92	110.909
2008	97	Hungary	101	Canary seed	0.0472032	0.0472032	209.865	4.007
2008	54	Denmark	103	Grain, mixed	0.0430083	0	0	7.856
2008	256	Luxembourg	103	Grain, mixed	3.48449	0	2003.58	1.954
2008	68	France	103	Grain, mixed	43.9451	4877.91	41967.6	5.064
2008	79	Germany	103	Grain, mixed	25.8772	129.386	23781.2	3.061
2008	33	Canada	103	Grain, mixed	0.0296954	0.682993	39.7027	110.909
2008	229	United Kingdom	103	Grain, mixed	14.7328	338.854	12021.9	5.868
2008	255	Belgium	103	Grain, mixed	1.69578	42.3946	1424.46	2.037
2008	210	Sweden	103	Grain, mixed	0.0799082	0.719174	86.2209	20.223
2008	203	Spain	103	Grain, mixed	1.50924	3124.12	2813.22	2.701
2008	126	Lithuania	103	Grain, mixed	4.53299	45.3299	10185.6	8.15
2008	223	Turkey	103	Grain, mixed	0.155672	159.253	343.413	1.801
2008	63	Estonia	103	Grain, mixed	0.546911	1.09382	1176.41	8.345
2008	119	Latvia	103	Grain, mixed	426.843	426.843	760634	8.345
2008	211	Switzerland	103	Grain, mixed	0.0237549	0.0712646	19.0989	1.642
2008	173	Poland	103	Grain, mixed	0.098245	0.098245	168.588	3.103
2008	167	Czech Republic	103	Grain, mixed	0.502098	17.5734	1158.34	3.932
2008	11	Austria	103	Grain, mixed	0.114746	4.13087	128.631	2.873
2008	126	Lithuania	108	Cereals, nes	17.9835	71.9339	34330.4	8.15
2008	27	Bulgaria	108	Cereals, nes	0.42609	39.6264	847.92	4.006
2008	173	Poland	108	Cereals, nes	4305.95	0	5.30493e+06	3.103
2008	167	Czech Republic	108	Cereals, nes	131.557	1052.46	118139	3.932
2008	84	Greece	108	Cereals, nes	1.46813	0	0	4.259
2008	57	Belarus	108	Cereals, nes	136.473	136.473	294236	5.092
2008	202	South Africa	108	Cereals, nes	0.165475	212.966	248.874	2.449
2008	104	Ireland	108	Cereals, nes	65.2315	0	0	19.74
2008	138	Mexico	108	Cereals, nes	0.066244	0	0	4.236
2008	230	Ukraine	108	Cereals, nes	0.152747	5.4989	295.871	4.3
2008	198	Slovenia	108	Cereals, nes	11.3085	56.5427	10302.1	4.224
2008	97	Hungary	108	Cereals, nes	133.998	8173.89	281530	4.007
2008	41	China	108	Cereals, nes	0.255887	4.60596	317.556	1.508
2008	9	Argentina	108	Cereals, nes	8.14661	1295.31	14501	13.678
2008	183	Romania	108	Cereals, nes	0.672105	22.8516	892.555	4.002
2008	106	Italy	108	Cereals, nes	11.9791	1102.08	7546.85	2.273
2008	272	Serbia	108	Cereals, nes	0.636212	NA	NA	4.37
2008	185	Russia	108	Cereals, nes	0.338086	37.1895	1655.61	12.681
2008	170	Peru	108	Cereals, nes	0.0701716	82.592	134.308	7.61
2008	216	Thailand	108	Cereals, nes	42.8054	2183.08	92759.4	3.613
2008	199	Slovak Republic	108	Cereals, nes	1.54662	123.729	2494.69	3.987
2008	211	Switzerland	108	Cereals, nes	4.22103	0	0	1.642
2008	256	Luxembourg	108	Cereals, nes	52.9271	0	21382.6	1.954
2008	11	Austria	108	Cereals, nes	8949.21	8949.21	1.79879e+06	2.873
2008	222	Tunisia	108	Cereals, nes	0.736051	1969.67	1403.65	0.869
2008	154	NA	116	Potatoes	0.0720835	NA	NA	NA
2008	98	Croatia	116	Potatoes	0.181275	0.725101	77.9483	4.398
2008	234	Uruguay	116	Potatoes	2.76747	110.699	642.052	14.962
2008	97	Hungary	116	Potatoes	6.81186	54.4949	1096.71	4.007
2008	121	Lebanon	116	Potatoes	0.112556	33.7669	2.70135	0.544
2008	104	Ireland	116	Potatoes	8.76448	8.76448	858.919	19.74
2008	41	China	116	Potatoes	1.33837	9.36862	287.75	1.508
2008	105	Israel	116	Potatoes	170.787	17591.1	7514.64	0.486
2008	89	Guatemala	116	Potatoes	0.0107621	0	1.71117	4.459
2008	202	South Africa	116	Potatoes	0.64103	43.59	57.6927	2.449
2008	40	Chile	116	Potatoes	0.588149	61.7557	52.3453	21.914
2008	50	Cyprus	116	Potatoes	589.376	33594.5	39488.2	NA
2008	52	Azerbaijan	116	Potatoes	0.058715	19.4934	6.34122	1.916
2008	119	Latvia	116	Potatoes	356.069	0	78335.1	8.345
2008	11	Austria	116	Potatoes	123.658	1854.87	14097	2.873
2008	223	Turkey	116	Potatoes	2.13457	162.228	121.671	1.801
2008	143	Morocco	116	Potatoes	68.9853	2207.53	9244.02	0.939
2008	231	United States	116	Potatoes	381.991	33997.2	18717.5	22
2008	29	Burundi	116	Potatoes	0.0223961	0	28.7789	0.42
2008	230	Ukraine	116	Potatoes	2.07577	8.30309	693.308	4.3
2008	112	Jordan	116	Potatoes	0.475683	67.547	12.3678	0.108
2008	68	France	116	Potatoes	2183.69	34939.1	172512	5.064
2008	10	Australia	116	Potatoes	2.96003	293.043	150.962	53.268
2008	194	Saudi Arabia	116	Potatoes	0.0593412	15.7254	0.830776	0.479
2008	57	Belarus	116	Potatoes	2.78517	2.78517	612.738	5.092
2008	222	Tunisia	116	Potatoes	5.28657	644.961	602.669	0.869
2008	174	Portugal	116	Potatoes	22.4074	4369.45	4615.93	2.74
2008	185	Russia	116	Potatoes	20.7342	41.4685	6178.8	12.681
2008	126	Lithuania	116	Potatoes	232.753	0	49110.9	8.15
2008	84	Greece	116	Potatoes	19.6529	1886.68	1690.15	4.259
2008	80	Bosnia and Herzegovina	116	Potatoes	0.2278	1.8224	106.383	4.4
2008	44	Colombia	116	Potatoes	0.0418344	0	10.2076	9.648
2008	117	South Korea	116	Potatoes	0.143752	NA	NA	1.14
2008	27	Bulgaria	116	Potatoes	1.27649	17.8709	374.012	4.006
2008	183	Romania	116	Potatoes	8.18696	49.1217	2177.73	4.002
2008	110	Japan	116	Potatoes	0.0239701	0.0479402	2.61274	3.555
2008	211	Switzerland	116	Potatoes	29.197	0	2861.3	1.642
2008	150	Netherlands	116	Potatoes	24780.8	74342.3	1.88334e+06	3.277
2008	162	Norway	116	Potatoes	51.3759	770.639	6524.74	55.393
2008	212	Syria	116	Potatoes	0.0403681	5.4497	1.61473	0.976
2008	102	Iran	116	Potatoes	0.0654405	NA	NA	0.976
2008	3	Albania	116	Potatoes	0.0554855	3.4401	8.10088	4.4
2008	216	Thailand	116	Potatoes	0.0215949	0	8.22766	3.613
2008	19	Bolivia	116	Potatoes	0.0149354	3.36046	12.3814	11.75
2008	156	New Zealand	116	Potatoes	27.2247	0	2177.98	58.852
2008	59	Egypt	116	Potatoes	63.2659	18283.9	1328.58	1.681
2008	9	Argentina	116	Potatoes	0.336279	17.1502	48.7604	13.678
2008	173	Poland	116	Potatoes	2832.04	2832.04	543751	3.103
2008	54	Denmark	116	Potatoes	3907.9	62526.4	297000	7.856
2008	124	Libya	116	Potatoes	0.162823	21.4926	10.095	1.143
2008	106	Italy	116	Potatoes	352.339	16207.6	45451.7	2.273
2008	63	Estonia	116	Potatoes	219.791	0	43518.7	8.345
2008	203	Spain	116	Potatoes	707.127	54448.7	63641.4	2.701
2008	256	Luxembourg	116	Potatoes	7.9772	0	941.309	1.954
2008	272	Serbia	116	Potatoes	3.25358	NA	NA	4.37
2008	167	Czech Republic	116	Potatoes	20.9939	41.9878	3065.11	3.932
2008	237	Vietnam	116	Potatoes	0.0186781	0	9.00282	3.809
2008	138	Mexico	116	Potatoes	0.082675	9.2596	11.4091	4.236
2008	165	Pakistan	116	Potatoes	0.0276092	3.5892	1.46329	0.594
2008	170	Peru	116	Potatoes	0.148964	24.7279	14.8964	7.61
2008	210	Sweden	116	Potatoes	4600.16	41401.4	450815	20.223
2008	100	India	116	Potatoes	0.558857	20.1188	123.507	0.881
2008	229	United Kingdom	116	Potatoes	104.432	1357.62	6892.53	5.868
2008	255	Belgium	116	Potatoes	4110.42	0	328833	2.037
2008	33	Canada	116	Potatoes	63.3131	0	8673.89	110.909
2008	79	Germany	116	Potatoes	9926.09	79408.8	833792	3.061
2008	198	Slovenia	116	Potatoes	6.66237	13.3247	1365.79	4.224
2008	199	Slovak Republic	116	Potatoes	1.58481	19.0177	385.109	3.987
2008	134	Malta	116	Potatoes	5.75885	691.062	380.084	NA
2008	105	Israel	122	Sweet potatoes	1060.08	199294	56184	0.486
2008	131	Malaysia	122	Sweet potatoes	0.0307892	0.0615783	14.0399	25.815
2008	170	Peru	122	Sweet potatoes	2.15389	101.233	460.932	7.61
2008	10	Australia	122	Sweet potatoes	0.261686	8.11226	63.5897	53.268
2008	95	Honduras	122	Sweet potatoes	101.17	404.68	73044.8	4.51
2008	159	Nigeria	122	Sweet potatoes	0.0222569	0.0222569	28.6446	2.328
2008	237	Vietnam	122	Sweet potatoes	3.78128	3.78128	2593.96	3.809
2008	203	Spain	122	Sweet potatoes	11.9413	1886.73	2244.97	2.701
2008	9	Argentina	122	Sweet potatoes	0.0879697	3.51879	34.6601	13.678
2008	129	Madagascar	122	Sweet potatoes	0.0985323	0.0985323	113.608	5.758
2008	32	Cameroon	122	Sweet potatoes	0.60699	1.21398	535.972	4.848
2008	234	Uruguay	122	Sweet potatoes	8.91158	151.497	5017.22	14.962
2008	84	Greece	122	Sweet potatoes	0.0668027	7.81592	8.21673	4.259
2008	41	China	122	Sweet potatoes	157.441	629.764	38100.7	1.508
2008	251	Zambia	122	Sweet potatoes	0.269989	0.539977	88.0163	5.161
2008	48	Costa Rica	122	Sweet potatoes	0.630898	0	0	4.51
2008	59	Egypt	122	Sweet potatoes	44.2914	5403.55	2746.07	1.681
2008	214	Taiwan	122	Sweet potatoes	0.0156136	NA	NA	2
2008	58	Ecuador	122	Sweet potatoes	2.24843	618.317	3458.08	2.575
2008	202	South Africa	122	Sweet potatoes	83.4256	58231.1	99443.3	2.449
2008	195	Senegal	122	Sweet potatoes	0.267263	2.9399	107.974	1.544
2008	21	Brazil	122	Sweet potatoes	170.324	1192.27	72728.3	16.749
2008	156	New Zealand	122	Sweet potatoes	0.33908	10.1724	83.7527	58.852
2008	38	Sri Lanka	122	Sweet potatoes	0.0587646	13.8684	37.4331	2.1
2008	109	Jamaica	122	Sweet potatoes	1.37175	4.11525	397.808	1.94
2008	89	Guatemala	122	Sweet potatoes	0.040857	0	0	4.459
2008	56	Dominican Republic	122	Sweet potatoes	2.40278	31.2362	2124.06	1.03
2008	169	Paraguay	122	Sweet potatoes	0.593663	0	562.199	15.566
2008	106	Italy	122	Sweet potatoes	3.3995	135.98	965.457	2.273
2008	117	South Korea	122	Sweet potatoes	0.136992	NA	NA	1.14
2008	231	United States	122	Sweet potatoes	303.023	17272.3	63634.9	22
2008	144	Mozambique	122	Sweet potatoes	0.157298	0.786491	126.625	3.451
2008	29	Burundi	122	Sweet potatoes	0.0381603	0	24.8042	0.42
2008	174	Portugal	122	Sweet potatoes	22.3868	4163.95	9581.56	2.74
2008	100	India	122	Sweet potatoes	0.240628	2.88754	141.249	0.881
2008	81	Ghana	122	Sweet potatoes	2.12932	2.12932	5365.89	2.981
2008	101	Indonesia	122	Sweet potatoes	0.0318166	0.540883	17.9446	16.287
2008	207	Suriname	122	Sweet potatoes	3.84379	0	1203.11	121.744
2008	226	Uganda	122	Sweet potatoes	0.479247	0	380.522	1.578
2008	75	Gambia	125	Cassava	0.0171514	0	35.7091	2.186
2008	38	Sri Lanka	125	Cassava	0.11065	0	87.4138	2.1
2008	237	Vietnam	125	Cassava	29.4274	0	16597.1	3.809
2008	28	Myanmar	125	Cassava	0.035779	0	25.9755	9.429
2008	216	Thailand	125	Cassava	2389.01	0	1.03922e+06	3.613
2008	66	Fiji	125	Cassava	0.013446	NA	NA	NA
2008	195	Senegal	125	Cassava	0.018729	0.0374581	14.1591	1.544
2008	53	Benin	125	Cassava	0.0723937	0	30.2606	2.331
2008	157	Nicaragua	125	Cassava	1.75695	0	1252.7	4.51
2008	171	Philippines	125	Cassava	0.0813348	0	72.388	3.939
2008	226	Uganda	125	Cassava	0.033621	0	15.4656	1.578
2008	166	Panama	125	Cassava	0.130956	0	78.5733	4.505
2008	101	Indonesia	125	Cassava	0.599212	0	251.669	16.287
2008	120	Lao	125	Cassava	0.0116895	NA	NA	8.865
2008	32	Cameroon	125	Cassava	1.01397	0	642.857	4.848
2008	169	Paraguay	125	Cassava	6.37251	0	3402.92	15.566
2008	207	Suriname	125	Cassava	0.206427	0	66.0566	121.744
2008	21	Brazil	125	Cassava	1005.62	1005.62	435434	16.749
2008	236	Venezuela	125	Cassava	0.0207885	NA	NA	17.1
2008	44	Colombia	125	Cassava	0.0930973	0	55.7653	9.648
2008	114	Kenya	125	Cassava	0.0103962	0	4.48078	1.018
2008	217	Togo	125	Cassava	0.628662	0	467.724	1.598
2008	95	Honduras	125	Cassava	1.45085	0	2264.78	4.51
2008	107	Cote d'Ivoire	125	Cassava	0.654448	NA	NA	2.937
2008	159	Nigeria	125	Cassava	0.0372809	0	19.3488	2.328
2008	100	India	125	Cassava	0.214942	0	55.4551	0.881
2008	58	Ecuador	125	Cassava	4.74908	0	3576.06	2.575
2008	131	Malaysia	125	Cassava	0.0338042	0	25.1165	25.815
2008	9	Argentina	125	Cassava	4.5624	0	11132.3	13.678
2008	48	Costa Rica	125	Cassava	74.2156	0	38740.6	4.51
2008	41	China	125	Cassava	2.72757	0	902.825	1.508
2008	81	Ghana	125	Cassava	27.6339	0	14922.3	2.981
2008	115	Cambodia	125	Cassava	24.1301	0	15298.5	9.505
2008	21	Brazil	137	Yams	4.21932	29.5353	1919.79	16.749
2008	63	Estonia	149	Roots and tubers, nes	8.16915	0	653.532	8.345
2008	110	Japan	149	Roots and tubers, nes	0.0739601	0.0739601	12.0555	3.555
2008	48	Costa Rica	149	Roots and tubers, nes	9.27737	27.8321	3154.3	4.51
2008	171	Philippines	149	Roots and tubers, nes	0.0219622	0.0439244	13.0455	3.939
2008	109	Jamaica	149	Roots and tubers, nes	0.325768	0.977304	53.1002	1.94
2008	59	Egypt	149	Roots and tubers, nes	0.0248941	15.7829	2.63878	1.681
2008	66	Fiji	149	Roots and tubers, nes	4.40958	NA	NA	NA
2008	157	Nicaragua	149	Roots and tubers, nes	0.415266	0.830532	286.118	4.51
2008	189	St. Lucia	149	Roots and tubers, nes	0.0184119	0	0.276178	NA
2008	217	Togo	149	Roots and tubers, nes	0.690681	0	296.302	1.598
2008	215	Tanzania	149	Roots and tubers, nes	0.229218	NA	NA	2.006
2008	198	Slovenia	149	Roots and tubers, nes	10.8052	0	0	4.224
2008	107	Cote d'Ivoire	149	Roots and tubers, nes	1.54208	NA	NA	2.937
2008	250	Congo, Dem. Rep.	149	Roots and tubers, nes	0.0148027	NA	NA	7.345
2008	32	Cameroon	149	Roots and tubers, nes	0.846178	0.846178	467.937	4.848
2008	81	Ghana	149	Roots and tubers, nes	3.59475	3.59475	1596.07	2.981
2008	170	Peru	149	Roots and tubers, nes	0.335573	44.9668	147.652	7.61
2008	91	Guyana	149	Roots and tubers, nes	0.0202906	0	6.51328	127.073
2008	58	Ecuador	149	Roots and tubers, nes	0.443176	154.225	346.12	2.575
2008	95	Honduras	149	Roots and tubers, nes	3.67423	36.7423	1484.39	4.51
2008	216	Thailand	149	Roots and tubers, nes	3.37521	33.7521	874.18	3.613
2008	236	Venezuela	149	Roots and tubers, nes	0.0495722	NA	NA	17.1
2008	114	Kenya	149	Roots and tubers, nes	0.0133781	0.0802688	3.89304	1.018
2008	131	Malaysia	149	Roots and tubers, nes	0.0681857	0.818228	41.4569	25.815
2008	165	Pakistan	149	Roots and tubers, nes	0.464331	29.7172	13.4656	0.594
2008	138	Mexico	149	Roots and tubers, nes	0.0962201	2.50172	8.75603	4.236
2008	130	Malawi	149	Roots and tubers, nes	0.0235712	0	0	1.342
2008	207	Suriname	149	Roots and tubers, nes	0.349055	0	138.575	121.744
2008	41	China	149	Roots and tubers, nes	9.60285	57.6171	1709.31	1.508
2008	166	Panama	149	Roots and tubers, nes	0.506759	0	67.399	4.505
2008	203	Spain	149	Roots and tubers, nes	3.49537	279.629	283.125	2.701
2008	101	Indonesia	149	Roots and tubers, nes	0.469292	16.8945	244.032	16.287
2008	44	Colombia	149	Roots and tubers, nes	1.57738	14.1964	391.189	9.648
2008	86	Grenada	149	Roots and tubers, nes	0.0140326	0.0701631	6.28661	NA
2008	194	Saudi Arabia	15	Wheat	1.6674	1822.47	396.841	0.479
2008	28	Myanmar	15	Wheat	0.284899	202.278	557.548	9.429
2008	113	Kyrgyz Republic	15	Wheat	2.497	1563.12	3728.02	1.352
2008	216	Thailand	15	Wheat	0.122288	0	510.432	3.613
2008	199	Slovak Republic	15	Wheat	331.878	1327.51	309310	3.987
[truncated: 3,717 more rows]

[truncated: 22 more sheets: 2007, 2006, 2005, 2004, 2003, 2002, 2001, 2000, 1999, 1998, 1997, 1996, 1995, 1994, 1993, 1992, 1991, 1990, 1989, 1988 …]
